# Supplementary material for: Connecting environmental exposure and neurodegeneration using cheminformatics and high resolution mass spectrometry: potential and challenges
Source: Royal Society of Chemistry journal article supplement (doi:10.1039/c9em00068b), 2019-01-01
Supplement: c9em00068b1.xlsx [file c9em00068b1.xlsx]

## Sheet: Overview
Overview
How to use: double-click on article count to see articles
Chemical	chemuid	LinkName	CAS RN	DSSToxID	dsstoxid	PMID Ct	Seizures	Nervous System Diseases	Peripheral Nervous System Diseases	Brain Diseases	Muscular Diseases	Basal Ganglia Diseases	Parkinson Disease, Secondary	Coma	Hallucinations	Tremor	Memory Disorders	Central Nervous System Diseases	Delirium	Cerebral Hemorrhage	Paresthesia	Dystonia	Myoclonus	Ataxia	Epilepsy	Hearing Loss	Paralysis	Confusion	Status Epilepticus	Sleep Wake Disorders	Hyperalgesia	Epilepsy, Tonic-Clonic	Sleep Initiation and Maintenance Disorders	Hearing Disorders	Stroke	Blindness	Hearing Loss, Sensorineural	Polyneuropathies	Movement Disorders	Syncope	Hepatic Encephalopathy	Brain Edema	Hypotension, Orthostatic	Parkinsonian Disorders	Inappropriate ADH Syndrome	Deafness	Intracranial Hemorrhages	Amnesia	Neuromuscular Diseases
Cisplatin	D002945	Cisplatin	15663-27-1	DTXSID4024983	DTXSID4024983	1032	20	47	140	13	0	4	1	1	0	1	2	4	0	0	18	1	0	1	1	231	3	1	2	1	15	2	0	77	5	14	106	7	1	0	0	1	2	0	17	29	0	1	2
Ethanol	D000431	Ethanol	64-17-5	DTXSID9020584	DTXSID9020584	768	100	23	11	18	26	1	3	20	6	17	54	2	6	4	2	2	2	44	12	3	2	5	1	10	5	3	1	2	6	3	1	1	3	3	4	5	3	1	0	1	0	14	1
Lead	D007854	Lead	7439-92-1	DTXSID2024161	DTXSID2024161	740	28	107	68	102	4	2	2	1	3	4	19	30	2	6	2	0	1	6	2	4	8	2	0	0	0	2	1	4	0	6	4	13	2	0	0	14	0	1	0	1	0	0	12
Lithium	D008094	Lithium	7439-93-2	DTXSID5036761	DTXSID5036761	689	30	50	9	22	5	36	13	25	6	93	12	15	23	0	1	3	14	16	10	1	3	22	15	6	0	5	1	0	0	0	0	1	15	2	0	0	1	1	1	0	0	6	11
Valproic Acid	D014635	Valproic Acid	76584-70-8	DTXSID70227388	DTXSID70227388	666	32	10	3	65	6	10	18	45	5	18	4	2	10	2	0	1	3	8	8	3	0	12	10	5	0	1	3	0	0	0	2	0	5	0	30	14	1	14	6	0	3	0	0
1-Methyl-4-phenyl-1,2,3,6-tetrahydropyridine	D015632	1-Methyl-4-phenyl-1,2,3,6-tetrahydropyridine	28289-54-5	DTXSID8040933	DTXSID8040933	638	1	24	0	11	0	6	289	0	0	5	0	1	0	0	0	4	0	1	3	0	0	0	1	1	0	0	0	0	0	0	0	0	3	0	0	0	0	33	0	0	0	0	1
Vincristine	D014750	Vincristine	2068-78-2	DTXSID8044331	DTXSID8044331	567	17	59	125	15	5	1	1	5	3	2	1	8	0	0	25	0	0	2	3	0	17	1	0	0	21	5	0	0	0	4	4	22	4	0	1	0	5	0	14	2	0	0	7
Phenytoin	D010672	Phenytoin	57-41-0	DTXSID8020541	DTXSID8020541	560	37	24	25	16	9	3	1	9	3	8	4	6	3	2	1	4	7	45	7	0	2	3	9	0	0	3	0	1	0	1	0	3	10	1	4	1	0	3	2	0	0	0	3
Haloperidol	D006220	Haloperidol	52-86-8	DTXSID4034150	DTXSID4034150	555	6	6	1	10	6	153	51	4	4	11	1	0	10	0	0	52	5	2	3	0	0	1	0	1	0	3	1	0	1	0	0	0	22	0	0	0	2	9	4	0	0	1	2
Cocaine	D003042	Cocaine	50-36-2	DTXSID2038443	DTXSID2038443	530	151	16	0	8	0	2	3	3	8	6	12	11	11	30	0	10	0	1	4	0	2	1	10	7	0	9	0	0	15	1	1	1	0	2	2	5	1	0	0	0	0	5	1
Aspirin	D001241	Aspirin	50-78-2	DTXSID5020108	DTXSID5020108	489	8	3	0	3	2	2	0	9	4	1	0	5	0	80	0	0	1	1	0	14	0	7	1	1	0	1	0	8	29	0	4	0	0	5	5	4	0	0	0	11	41	0	1
Paclitaxel	D017239	Paclitaxel	33069-62-4	DTXSID9023413	DTXSID9023413	485	4	43	217	9	14	0	0	0	0	0	1	2	0	0	13	0	0	4	0	0	0	1	0	1	53	1	0	1	0	0	3	7	0	0	3	0	1	0	1	0	0	0	4
Aluminum	D000535	Aluminum	7429-90-5	DTXSID3040273	DTXSID3040273	477	13	41	1	105	4	0	0	1	0	1	13	12	0	0	0	0	4	1	2	0	1	1	2	0	0	1	0	0	0	0	0	1	0	0	0	1	0	0	0	1	0	0	3
Lidocaine	D008012	Lidocaine	6108-05-0	DTXSID80209953	DTXSID80209953	464	150	26	15	3	2	0	0	8	4	6	2	10	3	0	7	0	2	4	6	0	8	3	2	1	5	16	0	0	0	13	0	0	0	7	0	0	1	0	1	0	0	0	0
Methotrexate	D008727	Methotrexate	59-05-2	DTXSID4020822	DTXSID4020822	451	17	25	1	79	4	0	1	5	0	1	9	18	1	1	0	0	0	3	2	0	6	3	3	0	0	3	0	1	5	1	0	0	0	0	1	13	0	0	1	0	2	0	0
Mercury	D008628	Mercury	7439-97-6	DTXSID1024172	DTXSID1024172	450	6	79	22	23	2	3	5	2	2	38	7	25	1	0	1	0	4	6	2	2	2	1	0	3	1	1	4	1	2	2	1	10	7	0	0	0	1	0	0	1	0	1	5
Kainic Acid	D007608	Kainic Acid	487-79-6	DTXSID7040526	DTXSID7040526	441	205	21	0	16	0	0	0	0	0	2	13	1	0	0	0	0	1	0	43	0	4	0	47	1	1	5	0	0	0	0	2	0	0	0	0	1	0	1	0	1	0	8	3
Risperidone	D018967	Risperidone	106266-06-2	DTXSID8045193	DTXSID8045193	408	4	0	0	0	0	135	11	1	9	3	1	1	10	0	1	27	0	1	0	0	0	5	0	5	0	1	7	0	12	0	0	0	0	1	0	1	5	3	2	0	0	0	1
Carbamazepine	D002220	Carbamazepine	85756-57-6	DTXSID00235052	DTXSID00235052	403	29	21	4	9	1	3	4	28	7	5	5	3	2	0	0	10	8	19	9	0	0	6	10	5	0	4	0	6	0	0	1	0	4	5	2	0	0	0	22	0	0	0	0
Warfarin	D014859	Warfarin	81-81-2	DTXSID5023742	DTXSID5023742	392	0	1	2	1	6	0	0	1	0	0	0	1	0	136	0	0	0	0	0	0	1	2	0	0	0	0	0	0	37	3	0	0	0	0	0	0	0	0	0	1	105	0	0
Clozapine	D003024	Clozapine	5786-21-0	DTXSID5022855	DTXSID5022855	364	64	1	0	1	1	55	12	7	5	6	1	5	15	0	0	16	16	0	13	0	1	6	1	7	0	15	3	0	0	0	0	0	2	6	2	0	5	1	0	0	0	1	1
Carbon Monoxide	D002248	Carbon Monoxide	630-08-0	DTXSID5027273	DTXSID5027273	352	5	29	3	59	7	8	17	14	0	2	10	11	1	2	0	0	1	1	3	2	2	4	1	0	0	0	0	2	0	2	4	2	1	2	0	7	0	3	0	4	0	15	1
Manganese	D008345	Manganese	7439-96-5	DTXSID2024169	DTXSID2024169	328	3	62	4	16	1	18	66	0	0	7	10	9	0	0	1	1	2	2	1	1	3	0	0	1	0	0	0	0	0	0	0	3	9	0	2	2	0	26	0	1	0	0	2
oxaliplatin	C030110	oxaliplatin	61825-94-3	DTXSID0036760	DTXSID0036760	327	0	11	148	4	0	0	0	1	0	0	2	1	0	1	20	0	0	1	0	5	2	0	0	0	42	0	0	0	0	0	0	6	0	0	0	0	0	0	0	0	1	0	1
Ethambutol	D004977	Ethambutol	74-55-5	DTXSID8023006	DTXSID8023006	318	2	3	13	1	0	0	0	0	0	0	1	1	0	0	2	0	0	0	2	0	0	0	0	0	0	0	0	1	0	11	0	1	0	0	1	0	0	0	0	3	0	0	0
Methanol	D000432	Methanol	67-56-1	DTXSID2021731	DTXSID2021731	318	6	8	0	14	0	10	12	17	0	4	3	4	0	11	0	2	0	1	0	0	1	1	0	0	0	0	0	1	0	41	0	1	2	0	0	11	0	2	0	0	3	0	1
Morphine	D009020	Morphine	6211-15-0	DTXSID1048914	DTXSID1048914	302	17	0	1	1	0	1	0	2	11	5	13	2	9	1	0	1	21	2	2	0	3	4	3	5	54	4	0	0	1	0	1	0	3	0	1	0	3	0	0	0	0	6	0
Isoniazid	D007538	Isoniazid	149-17-7	DTXSID3020758	DTXSID3020758	301	77	8	28	10	1	0	1	19	4	0	3	6	2	1	4	0	4	2	5	1	0	3	15	0	0	7	0	0	0	1	0	10	0	0	13	3	0	0	0	0	0	0	0
N-Methyl-3,4-methylenedioxyamphetamine	D018817	N-Methyl-3,4-methylenedioxyamphetamine	64057-70-1	DTXSID5048893	DTXSID5048893	298	28	19	0	11	0	2	9	5	8	5	70	4	1	5	0	2	1	0	1	0	0	1	1	6	0	3	1	0	4	0	1	0	0	1	2	14	1	7	10	0	1	4	0
Succinylcholine	D013390	Succinylcholine	306-40-1	DTXSID7048455	DTXSID7048455	293	2	2	0	1	78	0	0	0	0	0	0	0	0	0	0	0	0	0	0	0	20	0	0	0	0	0	0	0	0	0	0	1	2	0	0	0	0	0	0	0	0	0	5
Amiodarone	D000638	Amiodarone	19774-82-4	DTXSID7037185	DTXSID7037185	291	1	20	37	2	7	3	5	4	0	10	0	1	5	0	5	0	1	12	0	0	0	0	0	2	0	0	1	0	2	6	0	7	2	5	3	0	2	2	8	0	0	0	8
Fluoxetine	D005473	Fluoxetine	59333-67-4	DTXSID7020635	DTXSID7020635	269	21	4	0	2	1	24	10	3	9	12	4	1	10	1	3	15	9	3	1	1	0	3	2	6	0	7	17	0	0	0	0	0	1	4	0	0	6	0	24	0	0	2	0
Clioquinol	D007464	Clioquinol	130-26-7	DTXSID7022837	DTXSID7022837	268	0	18	12	4	0	0	0	0	0	0	1	3	0	0	6	0	0	5	1	0	2	1	0	0	0	0	0	0	0	3	0	3	0	0	0	0	0	0	0	0	0	4	4
Bupivacaine	D002045	Bupivacaine	14252-80-3	DTXSID0030877	DTXSID0030877	262	88	10	7	1	19	0	1	2	0	1	0	7	1	0	3	0	6	0	0	1	10	2	0	0	1	6	0	0	1	1	1	0	0	0	0	0	1	0	0	0	0	0	1
Ketamine	D007649	Ketamine	1867-66-9	DTXSID4040137	DTXSID4040137	250	24	3	2	3	1	0	0	2	82	5	25	1	14	0	0	1	1	6	2	0	0	2	0	5	6	1	0	0	0	1	0	0	1	0	0	1	0	0	0	0	0	6	0
olanzapine	C076029	olanzapine	132539-06-1	DTXSID9023388	DTXSID9023388	250	9	2	0	0	0	74	7	7	6	5	2	1	24	0	1	12	1	0	0	0	0	0	2	7	0	0	2	0	4	0	1	0	0	0	0	0	1	4	1	0	1	1	0
Thalidomide	D013792	Thalidomide	50-35-1	DTXSID9022524	DTXSID9022524	250	0	23	96	3	0	0	0	0	1	5	1	3	0	0	9	0	0	0	2	1	2	0	0	2	0	0	2	0	2	0	0	17	0	1	1	0	0	0	0	4	0	0	0
Arsenic	D001151	Arsenic	7440-38-2	DTXSID4023886	DTXSID4023886	249	2	38	60	14	3	0	0	1	1	0	7	7	1	1	9	0	0	2	0	2	1	1	0	0	0	0	1	4	3	2	1	12	1	0	1	0	0	0	0	2	0	0	0
Propofol	D015742	Propofol	2078-54-8	DTXSID6023523	DTXSID6023523	247	49	2	0	0	3	2	0	5	11	2	12	2	17	0	2	10	16	2	12	0	0	3	3	3	0	11	0	0	0	0	0	0	0	0	3	0	0	0	0	0	0	11	0
Tacrolimus	D016559	Tacrolimus	104987-11-3	DTXSID5046354	DTXSID5046354	247	14	19	6	22	0	0	0	5	0	13	0	1	1	1	2	0	0	1	2	1	0	4	3	1	2	3	5	0	0	3	0	6	0	0	0	10	0	1	4	1	1	0	0
Chloroquine	D002738	Chloroquine	54-05-7	DTXSID2040446	DTXSID2040446	239	16	8	10	3	34	5	1	4	3	0	0	2	1	0	1	1	1	0	3	2	0	0	2	0	0	4	1	2	0	5	3	2	5	3	0	1	0	0	0	3	0	1	21
Fentanyl	D005283	Fentanyl	990-73-8	DTXSID80243933	DTXSID80243933	236	22	0	0	3	1	1	0	11	3	3	0	0	18	0	0	2	10	1	1	0	1	4	1	2	21	6	0	0	0	0	0	0	0	0	0	0	0	0	1	0	1	3	0
Lithium Carbonate	D016651	Lithium Carbonate	554-13-2	DTXSID1023784	DTXSID1023784	230	5	13	6	10	2	14	7	5	1	13	4	4	8	0	0	1	6	7	1	1	0	7	1	1	0	1	2	0	0	0	0	1	1	2	0	0	1	3	0	0	0	1	4
Metoclopramide	D008787	Metoclopramide	2576-84-3	DTXSID20180434	DTXSID20180434	229	3	7	0	1	5	47	37	0	0	5	0	1	1	1	0	59	7	0	0	0	0	0	0	0	0	0	1	1	0	0	0	0	5	1	0	0	0	0	0	0	0	0	0
Diazepam	D003975	Diazepam	439-14-5	DTXSID4020406	DTXSID4020406	228	33	3	1	1	2	1	2	19	5	4	8	0	3	1	1	5	2	9	1	0	0	0	2	4	0	3	3	0	0	0	0	0	4	3	1	0	3	1	1	0	0	25	0
Theophylline	D013806	Theophylline	58-55-9	DTXSID5021336	DTXSID5021336	225	113	13	0	6	1	0	0	3	0	13	1	4	0	1	0	0	0	0	9	0	0	1	12	4	0	8	1	0	0	0	1	0	1	0	0	0	1	0	3	1	0	1	0
Pentylenetetrazole	D010433	Pentylenetetrazole	54-95-5	DTXSID7041091	DTXSID7041091	222	163	0	0	0	0	0	0	0	0	0	0	0	0	0	0	0	2	0	32	0	0	0	5	0	0	2	0	0	0	0	0	0	0	1	0	0	0	0	0	0	0	1	0
Bismuth	D001729	Bismuth	7440-69-9	DTXSID3052484	DTXSID3052484	220	5	3	0	84	0	0	0	1	6	7	5	1	4	0	2	0	50	4	3	0	0	11	0	0	0	0	2	2	0	0	0	0	5	0	0	1	0	0	0	0	0	0	0
Metrizamide	D008793	Metrizamide	31112-62-6	DTXSID1023310	DTXSID1023310	218	37	5	0	14	0	1	0	2	1	0	1	5	3	1	2	0	3	0	10	0	5	8	6	0	0	6	0	0	0	0	1	0	8	0	0	1	0	0	1	0	0	0	1
Metronidazole	D008795	Metronidazole	69198-10-3	DTXSID70219228	DTXSID70219228	218	11	11	28	36	0	1	0	2	3	1	0	5	0	1	7	1	0	4	1	0	1	7	0	0	0	0	0	0	0	0	2	4	2	0	0	4	0	0	0	3	0	0	2
Methamphetamine	D008694	Methamphetamine	537-46-2	DTXSID8037128	DTXSID8037128	216	19	13	1	7	0	1	7	1	20	0	26	2	4	10	2	0	0	0	0	0	0	1	0	1	0	4	0	0	5	2	0	0	2	0	0	6	0	4	0	0	2	0	0
Pilocarpine	D010862	Pilocarpine	54-71-7	DTXSID2041096	DTXSID2041096	212	55	0	1	1	0	0	0	0	1	2	0	0	0	0	0	0	0	0	30	0	0	1	72	0	0	0	0	0	0	1	0	0	0	0	0	0	0	0	0	0	0	0	0
Chlorpromazine	D002746	Chlorpromazine	580-48-3	DTXSID6041765	DTXSID6041765	210	10	5	0	2	8	41	17	7	0	10	0	1	2	1	0	9	0	0	0	0	1	2	1	1	0	4	2	0	0	2	0	0	12	3	0	0	11	2	1	0	0	0	0
Caffeine	D002110	Caffeine	58-08-2	DTXSID0020232	DTXSID0020232	207	29	5	0	2	1	0	3	3	4	9	5	1	4	2	3	1	2	2	4	0	2	0	1	20	2	6	24	0	2	0	0	0	0	1	0	1	0	0	0	0	1	0	1
Amitriptyline	D000639	Amitriptyline	17086-03-2	DTXSID60168958	DTXSID60168958	204	28	3	6	2	1	3	2	20	6	5	1	3	14	1	4	2	6	1	4	0	1	5	3	3	0	4	2	1	1	0	0	1	0	8	0	0	3	0	7	0	0	1	0
Fluorouracil	D005472	Fluorouracil	51-21-8	DTXSID2020634	DTXSID2020634	198	7	16	7	26	1	0	1	3	0	1	0	4	0	0	16	2	0	7	0	0	1	3	0	0	0	0	0	0	2	1	0	0	0	0	0	3	0	0	2	1	0	0	1
Toluene	D014050	Toluene	108-88-3	DTXSID7021360	DTXSID7021360	195	6	17	8	5	2	0	1	3	1	4	8	11	1	0	0	0	1	2	0	17	5	1	1	1	0	2	0	8	0	0	2	0	1	0	0	0	0	0	0	0	0	1	2
Cytarabine	D003561	Cytarabine	69-74-9	DTXSID5024891	DTXSID5024891	190	2	14	10	16	0	1	3	1	0	2	2	12	0	0	2	0	0	4	0	0	3	1	0	0	0	1	0	1	2	1	0	1	0	1	0	0	1	0	0	0	0	0	0
Fluphenazine	D005476	Fluphenazine	69-23-8	DTXSID2023068	DTXSID2023068	190	5	2	0	2	1	51	30	4	0	3	0	0	2	0	0	8	0	0	0	0	0	0	1	5	0	0	1	0	0	0	0	0	39	0	0	0	0	1	3	0	0	0	1
Nitrous Oxide	D009609	Nitrous Oxide	10024-97-2	DTXSID8021066	DTXSID8021066	190	9	22	15	3	0	1	0	0	6	1	4	2	2	0	9	1	1	1	1	0	3	1	0	0	0	0	0	2	1	4	0	5	2	0	0	0	0	0	0	2	1	1	1
Heroin	D003932	Heroin	1502-95-0	DTXSID2048909	DTXSID2048909	189	3	3	7	17	6	1	1	10	1	0	2	0	0	3	0	1	4	2	1	0	6	1	0	0	3	0	0	0	2	1	1	1	0	1	1	2	0	0	0	2	0	0	1
Heparin	D006493	Heparin	9005-49-6	DTXSID20872761	DTXSID20872761	184	0	0	4	0	20	0	0	0	0	0	0	0	0	68	0	0	0	0	0	0	2	0	0	0	0	0	0	0	4	0	0	0	0	0	0	0	1	0	1	0	17	0	0
Scopolamine Hydrobromide	D012601	Scopolamine Hydrobromide	114-49-8	DTXSID0032029	DTXSID0032029	182	4	1	0	0	0	0	0	5	19	0	61	1	8	0	1	0	0	1	0	0	0	8	0	0	1	0	1	0	0	0	0	0	0	0	0	0	0	0	0	0	0	29	0
Disulfiram	D004221	Disulfiram	97-77-8	DTXSID1021322	DTXSID1021322	181	13	5	40	9	0	2	3	3	0	0	1	1	7	3	2	4	3	0	2	0	2	0	0	0	0	0	0	0	1	0	0	11	0	0	7	1	0	0	0	0	0	0	1
Acetaminophen	D000082	Acetaminophen	103-90-2	DTXSID2020006	DTXSID2020006	179	4	0	0	2	1	0	0	19	3	1	0	1	1	5	0	0	2	1	1	4	1	3	1	0	3	1	0	1	3	1	3	0	0	0	70	7	0	0	0	1	0	0	0
Bupropion	D016642	Bupropion	34911-55-2	DTXSID7022706	DTXSID7022706	176	73	1	0	0	0	1	2	4	14	2	0	0	10	0	0	4	0	1	4	0	0	2	4	2	0	15	8	0	1	0	0	0	0	2	0	1	5	1	0	0	0	0	0
Dexamethasone	D003907	Dexamethasone	50-02-2	DTXSID3020384	DTXSID3020384	176	2	5	5	3	16	1	0	2	1	0	12	1	1	3	4	0	0	0	0	2	1	1	1	4	0	0	4	0	0	1	0	0	1	0	1	3	1	0	0	1	1	1	1
Baclofen	D001418	Baclofen	1134-47-0	DTXSID5022641	DTXSID5022641	167	18	2	1	8	0	0	1	28	6	2	4	2	9	1	0	2	3	1	6	0	1	5	7	1	1	4	0	0	0	0	0	0	2	0	1	0	0	0	0	0	0	2	0
Soman	D012999	Soman	96-64-0	DTXSID2031906	DTXSID2031906	166	100	7	1	8	0	0	0	0	0	5	1	1	0	0	0	0	0	0	6	0	1	0	18	0	0	1	0	0	0	0	0	0	1	0	0	2	0	0	0	0	0	0	0
Quinine	D011803	Quinine	130-89-2	DTXSID7044213	DTXSID7044213	163	4	1	1	0	0	0	0	2	0	0	0	1	0	1	0	1	0	0	0	8	1	1	0	0	0	0	0	10	0	53	6	0	0	1	0	0	0	0	0	7	0	0	2
Streptomycin	D013307	Streptomycin	3810-74-0	DTXSID9026053	DTXSID9026053	158	0	3	0	0	0	0	0	0	1	0	0	0	0	0	0	0	0	2	0	10	0	0	0	2	0	0	0	54	0	0	8	0	0	0	0	0	0	0	0	30	0	0	1
Aripiprazole	D000068180	Aripiprazole	129722-12-9	DTXSID3046083	DTXSID3046083	150	3	0	0	0	0	33	5	2	2	2	0	0	0	0	0	27	0	0	0	0	0	1	0	1	0	0	10	0	0	0	0	0	0	0	0	0	2	9	2	0	0	0	0
Bortezomib	D000069286	Bortezomib	179324-69-7	DTXSID3040980	DTXSID3040980	150	0	2	102	0	1	0	0	0	0	0	0	0	0	0	2	0	0	0	0	0	0	1	0	0	10	0	1	0	0	0	1	5	0	0	0	0	0	0	1	0	0	0	0
Quetiapine Fumarate	D000069348	Quetiapine Fumarate	111974-72-2	DTXSID3044201	DTXSID3044201	150	11	0	0	0	1	30	3	8	3	1	0	2	5	1	0	7	4	1	0	0	0	1	1	3	0	1	3	0	1	0	0	0	0	1	0	0	5	4	3	0	0	0	0
Carbon Disulfide	D002246	Carbon Disulfide	75-15-0	DTXSID6023947	DTXSID6023947	149	0	36	21	7	0	1	2	0	0	3	1	8	0	0	1	0	0	0	0	0	1	0	0	0	0	0	0	4	0	0	1	14	2	0	0	0	0	1	0	0	0	0	4
Methylprednisolone	D008775	Methylprednisolone	83-43-2	DTXSID7023300	DTXSID7023300	148	10	2	0	1	19	0	0	0	4	1	4	2	1	0	1	0	0	0	0	0	4	0	0	1	0	0	2	0	0	9	0	1	0	0	0	2	0	0	0	0	1	0	1
Simvastatin	D019821	Simvastatin	79902-63-9	DTXSID0023581	DTXSID0023581	144	0	0	3	0	77	0	0	0	0	0	7	0	0	0	0	0	0	0	0	0	0	0	0	5	0	0	0	0	0	0	0	2	0	0	0	0	0	0	0	0	1	1	0
Methylphenidate	D008774	Methylphenidate	113-45-1	DTXSID5023299	DTXSID5023299	143	11	1	0	0	0	0	0	0	16	1	3	0	1	0	0	6	0	3	2	0	0	0	1	8	0	2	22	0	2	0	0	0	3	1	0	0	0	0	0	0	0	0	0
Imipramine	D007099	Imipramine	50-49-7	DTXSID1043881	DTXSID1043881	139	21	0	0	0	0	2	1	10	8	9	1	2	4	0	0	1	3	0	6	0	0	4	0	3	0	6	6	0	0	0	0	1	0	1	1	1	13	0	7	0	0	0	0
Fructose	D005632	Fructose	57-48-7	DTXSID5023081	DTXSID5023081	138	3	5	0	5	0	1	0	3	9	2	7	2	0	0	21	0	4	1	1	0	0	4	2	3	0	1	1	0	0	2	0	0	0	0	2	0	0	0	0	0	0	0	0
Nicotine	D009538	Nicotine	25162-00-9	DTXSID0046351	DTXSID0046351	138	33	4	0	2	0	0	1	0	2	12	6	1	3	0	0	0	0	1	0	0	1	1	0	8	3	0	7	0	1	2	1	0	0	0	0	0	0	0	0	0	0	1	1
Colchicine	D003078	Colchicine	75520-89-7	DTXSID60226466	DTXSID60226466	136	3	6	8	4	40	0	0	2	0	0	4	0	0	0	0	0	0	1	2	0	3	0	0	0	0	0	0	0	0	1	0	1	0	0	0	0	0	0	0	0	0	0	28
Propranolol	D011433	Propranolol	318-98-9	DTXSID3021198	DTXSID3021198	135	7	0	0	1	3	2	2	2	19	5	5	5	6	0	2	1	1	2	1	0	0	6	0	9	0	1	3	0	2	0	0	0	0	7	6	0	2	0	0	0	0	1	0
Sildenafil Citrate	D000068677	Sildenafil Citrate	171599-83-0	DTXSID4046076	DTXSID4046076	133	7	0	0	0	0	0	0	1	0	0	0	2	0	8	0	0	0	0	0	3	0	0	0	0	0	1	0	1	5	4	4	0	0	1	0	0	2	0	0	0	0	1	0
lamotrigine	C047781	lamotrigine	84057-84-1	DTXSID2023195	DTXSID2023195	132	15	2	0	1	1	1	0	2	7	4	1	0	4	0	0	2	5	3	2	0	0	2	4	3	0	3	6	0	0	0	0	0	0	0	2	0	0	0	1	0	0	0	0
sevoflurane	C009250	sevoflurane	28523-86-6	DTXSID8046614	DTXSID8046614	131	28	1	0	1	0	0	0	0	1	0	20	1	25	0	0	1	1	0	22	0	0	0	0	1	0	5	0	0	0	0	0	0	0	0	0	0	0	0	0	0	0	2	0
Carboplatin	D016190	Carboplatin	41575-94-4	DTXSID3046742	DTXSID3046742	130	1	6	18	0	2	0	0	2	0	0	0	0	0	1	2	0	0	1	0	31	0	0	0	0	0	0	0	9	1	2	15	0	0	0	0	1	0	0	1	4	0	0	0
Phenobarbital	D010634	Phenobarbital	57-30-7	DTXSID0021123	DTXSID0021123	130	13	6	1	3	5	0	0	19	0	0	0	0	0	2	0	1	0	5	0	0	1	1	2	2	0	0	0	0	0	0	0	0	0	0	3	0	0	0	0	0	0	0	0
Citalopram	D015283	Citalopram	128196-01-0	DTXSID8048440	DTXSID8048440	129	17	1	0	0	0	4	2	2	7	3	0	1	4	0	3	3	4	0	0	0	0	9	1	3	0	1	9	0	2	0	0	0	0	2	0	0	3	3	21	0	0	0	0
Kanamycin	D007612	Kanamycin	8063-07-8	DTXSID2041171	DTXSID2041171	129	3	1	0	0	0	0	0	0	0	0	0	0	0	0	0	0	0	0	0	18	2	0	0	0	0	0	0	36	0	0	19	0	0	0	0	0	0	0	0	33	0	0	1
Sertraline	D020280	Sertraline	79559-97-0	DTXSID1040243	DTXSID1040243	129	8	2	0	1	0	4	7	3	5	7	0	1	2	0	2	7	5	0	1	0	0	1	0	1	0	1	8	0	0	0	0	0	0	0	0	0	1	2	19	0	0	0	1
topiramate	C052342	topiramate	97240-79-4	DTXSID8023688	DTXSID8023688	129	3	5	0	5	0	1	0	3	9	2	5	2	0	0	21	0	4	1	1	0	0	4	2	3	0	1	1	0	0	2	0	0	0	0	1	0	0	0	0	0	0	0	0
zolpidem	C049109	zolpidem	82626-48-0	DTXSID7045946	DTXSID7045946	128	6	0	0	0	0	0	1	6	19	0	3	3	7	0	0	1	0	6	2	0	0	3	0	6	0	2	6	0	1	0	0	0	0	0	1	0	0	0	0	0	0	8	0
Paroxetine	D017374	Paroxetine	72471-80-8	DTXSID70222772	DTXSID70222772	126	4	3	0	0	0	5	2	3	8	7	0	3	8	0	2	2	2	3	1	0	0	3	0	2	0	2	8	0	1	0	0	0	0	0	1	0	2	0	17	0	0	0	0
Phenylpropanolamine	D010665	Phenylpropanolamine	154-41-6	DTXSID2025896	DTXSID2025896	126	6	4	0	0	1	0	0	0	6	0	2	2	0	38	0	2	0	0	1	0	0	1	0	2	0	2	0	0	20	0	0	0	0	0	0	0	1	0	1	0	5	0	0
Oxidopamine	D016627	Oxidopamine	636-00-0	DTXSID30212972	DTXSID30212972	122	2	2	1	2	0	0	43	0	0	2	0	0	0	0	0	0	0	0	0	0	0	0	0	0	0	0	0	0	0	0	0	0	1	0	0	0	0	44	0	0	0	0	0
Midazolam	D008874	Midazolam	59467-70-8	DTXSID5023320	DTXSID5023320	120	6	7	0	0	1	2	0	6	9	0	3	1	11	0	0	2	6	2	2	0	0	3	1	0	0	1	0	0	0	0	0	0	0	1	1	0	0	0	0	0	0	16	0
Cimetidine	D002927	Cimetidine	51481-61-9	DTXSID4020329	DTXSID4020329	119	4	7	3	6	1	1	1	3	4	1	0	7	9	0	1	2	0	0	1	0	0	39	0	1	0	1	1	0	0	0	0	0	0	0	1	0	1	0	0	0	0	0	2
Methadone	D008691	Methadone	1095-90-5	DTXSID2020501	DTXSID2020501	119	3	4	1	2	0	1	0	5	4	3	1	1	2	1	0	0	2	0	0	0	0	1	0	7	6	0	2	0	0	1	3	0	2	4	0	1	0	0	0	0	0	0	0
Ibuprofen	D007052	Ibuprofen	31121-93-4	DTXSID4040501	DTXSID4040501	116	3	2	0	0	1	0	0	5	0	0	0	4	1	1	0	0	0	0	1	2	0	0	1	0	0	1	0	0	1	0	0	0	0	1	1	1	0	0	0	0	1	0	0
Venlafaxine Hydrochloride	D000069470	Venlafaxine Hydrochloride	99300-78-4	DTXSID8047397	DTXSID8047397	114	20	1	0	1	0	2	1	5	6	4	2	4	4	0	2	1	4	1	0	0	0	2	0	4	0	1	4	0	1	0	0	0	0	0	0	0	2	0	8	0	0	0	1
Sodium Oxybate	D012978	Sodium Oxybate	502-85-2	DTXSID3048940	DTXSID3048940	112	19	0	0	0	0	0	0	32	4	5	0	2	11	0	0	0	0	0	2	0	0	1	0	2	0	2	4	0	0	0	0	0	0	1	0	0	0	0	0	0	0	0	0
Ciprofloxacin	D002939	Ciprofloxacin	86393-32-0	DTXSID00273974	DTXSID00273974	111	18	2	3	1	7	1	0	1	5	3	0	2	8	0	1	1	7	0	3	0	0	3	3	2	0	3	0	1	0	2	0	0	0	2	0	0	0	0	1	1	1	0	0
Sulpiride	D013469	Sulpiride	15676-16-1	DTXSID1042574	DTXSID1042574	110	1	0	0	1	0	17	7	1	0	7	0	0	0	0	0	13	0	0	0	0	0	0	0	0	0	0	1	0	0	0	0	0	0	1	0	0	1	4	0	0	0	0	0
Acyclovir	D000212	Acyclovir	59277-89-3	DTXSID1022556	DTXSID1022556	109	2	18	0	12	0	1	0	13	9	5	0	4	3	0	2	0	5	2	0	0	0	9	3	0	0	1	0	0	0	0	1	0	0	0	0	0	0	0	0	0	0	0	0
Perhexiline	D010480	Perhexiline	6621-47-2	DTXSID7023439	DTXSID7023439	109	0	10	33	2	3	1	3	0	0	1	0	0	0	0	5	0	0	1	0	0	1	0	0	0	0	0	0	0	0	0	0	5	2	0	1	0	0	0	0	0	0	0	4
Amantadine	D000547	Amantadine	768-94-5	DTXSID8022117	DTXSID8022117	108	4	1	2	1	1	6	7	1	16	2	2	3	7	0	1	0	6	2	0	0	0	3	1	4	0	0	6	0	0	1	0	0	7	0	0	0	0	1	1	0	0	0	0
Atorvastatin Calcium	D000069059	Atorvastatin Calcium	134523-03-8	DTXSID6044303	DTXSID6044303	108	0	0	0	0	39	0	0	0	0	0	2	0	0	3	0	0	0	1	0	1	0	0	0	0	0	0	0	0	5	0	0	2	0	0	0	0	0	0	0	0	1	1	0
Bromocriptine	D001971	Bromocriptine	25614-03-3	DTXSID1022687	DTXSID1022687	108	8	2	0	0	0	2	0	0	10	0	0	0	0	3	0	4	4	0	0	0	0	3	2	2	0	1	0	0	1	1	1	0	2	3	0	0	8	0	0	0	0	0	0
Oxygen	D010100	Oxygen	7782-44-7	DTXSID2037681	DTXSID2037681	108	65	1	0	3	0	0	0	0	0	3	0	11	0	0	0	0	1	0	5	0	2	0	0	0	0	1	0	0	1	1	0	0	0	0	0	0	0	0	0	1	0	0	0
Prednisone	D011241	Prednisone	53-03-2	DTXSID4021185	DTXSID4021185	108	6	2	1	5	16	0	0	4	1	0	5	0	3	0	2	0	0	3	0	0	0	1	0	0	0	0	3	0	0	0	0	1	0	0	0	0	0	0	0	0	0	1	1
Clonidine	D003000	Clonidine	4205-90-7	DTXSID6022846	DTXSID6022846	107	8	1	0	0	1	0	0	9	7	0	1	2	5	0	1	0	0	0	1	0	0	0	1	7	2	0	2	0	0	0	0	0	0	4	0	0	6	0	1	0	0	1	0
Ifosfamide	D007069	Ifosfamide	3778-73-2	DTXSID7020760	DTXSID7020760	107	3	7	3	53	0	2	0	3	3	0	0	6	1	0	0	0	1	0	1	1	0	4	4	2	0	1	0	1	0	0	1	0	0	0	1	0	0	0	2	0	0	0	0
Zidovudine	D015215	Zidovudine	30516-87-1	DTXSID8020127	DTXSID8020127	107	1	3	6	1	37	0	0	1	0	0	0	2	0	0	1	0	0	1	1	1	0	0	0	0	0	1	0	0	0	0	0	0	0	0	1	0	1	0	0	0	0	0	1
Trichloroethylene	D014241	Trichloroethylene	79-01-6	DTXSID0021383	DTXSID0021383	106	0	11	3	6	2	0	5	5	1	2	0	2	2	0	0	0	0	0	0	1	1	0	0	1	0	0	0	3	0	0	1	4	0	0	0	2	0	0	0	0	0	1	2
Iothalamic Acid	D007483	Iothalamic Acid	2276-90-6	DTXSID5023164	DTXSID5023164	105	21	4	0	1	2	0	0	0	0	0	0	1	0	1	0	0	5	0	3	0	0	1	0	0	0	3	0	0	0	0	0	0	0	2	0	0	0	0	0	0	0	0	0
Pyridoxine	D011736	Pyridoxine	65-23-6	DTXSID4023541	DTXSID4023541	105	11	20	29	0	0	0	0	2	0	0	0	3	0	0	2	0	1	6	5	0	2	0	1	0	0	0	0	0	0	0	0	2	1	0	0	0	0	0	0	0	0	0	2
Amphetamine	D000661	Amphetamine	60-13-9	DTXSID4020082	DTXSID4020082	102	10	1	0	0	0	1	0	3	7	4	1	0	0	12	1	1	0	1	1	0	1	1	0	1	0	0	3	0	2	0	0	0	5	0	0	0	0	1	0	0	0	0	0
Deoxycytidine	D003841	Deoxycytidine	951-77-9	DTXSID70883620	DTXSID70883620	102	1	7	15	2	4	0	0	1	0	0	0	3	0	0	20	1	0	0	1	0	0	1	0	0	0	1	3	0	1	1	0	1	0	0	1	2	0	0	0	0	0	0	1
Isoflurane	D007530	Isoflurane	26675-46-7	DTXSID3020752	DTXSID3020752	101	10	4	1	0	0	0	0	0	1	0	23	0	7	0	0	0	1	0	3	0	0	0	0	1	0	1	0	0	0	1	0	0	0	0	1	3	0	0	0	0	0	5	0
Neomycin	D009355	Neomycin	55298-68-5	DTXSID80203810	DTXSID80203810	101	1	0	0	1	0	0	0	0	0	0	0	0	0	0	0	0	0	0	0	6	3	1	0	0	0	0	0	22	0	0	16	0	0	0	0	0	0	0	0	46	0	0	2
Pirenzepine	D010890	Pirenzepine	28797-61-7	DTXSID7023487	DTXSID7023487	100	6	1	0	0	0	41	4	2	1	3	0	1	1	0	0	6	0	0	0	0	0	0	1	3	0	0	0	0	0	0	0	0	0	0	0	0	1	1	0	0	0	1	0
Furosemide	D005665	Furosemide	41733-55-5	DTXSID90194528	DTXSID90194528	98	1	0	0	0	0	0	0	0	0	0	0	0	0	1	3	0	0	0	0	9	3	0	0	0	0	0	0	22	0	0	11	0	0	2	3	0	1	0	0	16	0	0	1
Iohexol	D007472	Iohexol	66108-95-0	DTXSID6023157	DTXSID6023157	98	8	0	1	3	0	0	0	1	0	0	0	3	0	2	10	0	1	0	3	0	3	1	3	0	0	1	0	0	0	4	1	0	0	0	0	5	0	0	0	0	0	1	0
Deferoxamine	D003676	Deferoxamine	70-51-9	DTXSID7022887	DTXSID7022887	97	1	2	0	3	0	0	0	0	1	0	1	0	0	0	0	0	0	0	0	6	0	0	0	0	0	1	0	4	0	2	24	0	0	0	0	0	0	0	0	3	0	0	0
Indomethacin	D007213	Indomethacin	74252-25-8	DTXSID00225256	DTXSID00225256	97	3	2	1	1	0	0	0	0	3	0	0	8	1	13	0	0	0	2	0	1	2	0	0	1	0	0	0	0	0	0	1	0	0	0	1	1	0	0	0	0	6	0	0
Ethylnitrosourea	D005038	Ethylnitrosourea	759-73-9	DTXSID8020593	DTXSID8020593	96	0	2	0	2	0	0	0	0	0	0	1	0	0	0	0	0	0	0	0	2	0	0	0	0	0	0	0	0	0	0	0	0	0	0	0	1	0	0	0	0	0	0	0
Thallium	D013793	Thallium	7440-28-0	DTXSID2036035	DTXSID2036035	96	2	8	17	2	0	0	0	2	0	0	0	2	0	1	8	0	0	2	0	0	3	0	0	0	1	0	1	0	0	0	0	16	0	0	0	1	0	0	0	0	0	0	0
Atropine	D001285	Atropine	51-55-8	DTXSID4020113	DTXSID4020113	94	11	2	0	2	0	0	0	15	10	1	2	3	9	0	0	0	0	1	0	0	3	0	0	0	0	0	0	0	0	2	0	0	0	0	0	0	0	0	0	0	0	2	0
Phencyclidine	D010622	Phencyclidine	2981-31-9	DTXSID70183950	DTXSID70183950	94	12	2	0	0	1	0	0	8	5	0	6	0	3	2	0	2	0	8	1	0	0	1	0	0	0	0	0	0	0	1	0	0	1	0	1	1	0	0	0	0	0	2	0
Ammonia	D000641	Ammonia	7664-41-7	DTXSID0023872	DTXSID0023872	93	11	5	2	6	0	0	0	9	0	1	0	1	0	0	0	0	0	0	0	0	1	0	0	0	0	0	0	0	0	1	0	0	0	0	6	11	0	0	0	0	0	0	0
Hydroxychloroquine	D006886	Hydroxychloroquine	747-36-4	DTXSID1047811	DTXSID1047811	93	1	0	1	0	13	0	0	1	0	0	0	0	1	0	1	0	0	1	0	1	0	0	0	0	0	0	0	1	0	3	3	0	0	0	1	0	0	0	0	1	0	0	1
Lorazepam	D008140	Lorazepam	846-49-1	DTXSID7023225	DTXSID7023225	93	11	0	0	0	0	1	0	9	5	0	4	0	7	0	0	0	1	1	1	0	0	1	4	3	0	1	3	0	0	0	0	0	0	0	0	0	0	0	1	0	0	15	0
remifentanil	C071741	remifentanil	132539-07-2	DTXSID50157614	DTXSID50157614	93	4	0	0	0	0	0	0	0	0	0	0	0	1	0	0	0	0	0	2	0	0	0	0	1	60	5	0	0	0	0	0	0	0	0	0	0	0	0	0	0	0	0	0
ropivacaine	C037663	ropivacaine	84057-95-4	DTXSID4040187	DTXSID4040187	93	32	2	1	1	4	0	0	0	1	0	0	7	0	0	2	0	0	0	0	0	0	1	0	0	3	10	0	0	0	0	0	3	0	0	0	0	0	0	0	0	0	0	0
Sarin	D012524	Sarin	107-44-8	DTXSID0042371	DTXSID0042371	92	18	12	0	3	1	0	0	1	0	5	1	5	0	0	0	0	0	2	0	0	0	0	0	0	0	0	2	0	0	0	0	0	0	0	0	0	0	0	0	0	0	0	1
n-hexane	C026385	n-hexane	27581-27-7	DTXSID10583879	DTXSID10583879	91	0	12	27	0	0	0	1	0	0	0	0	6	0	0	1	0	0	2	0	0	2	0	0	0	0	0	0	0	0	0	0	21	0	0	0	0	0	1	0	0	0	0	5
Meperidine	D008614	Meperidine	57-42-1	DTXSID9023253	DTXSID9023253	90	25	3	0	2	4	0	3	0	4	2	0	7	3	0	0	2	4	0	0	0	0	1	0	1	0	5	0	0	0	1	0	0	0	0	0	1	0	0	0	0	0	0	0
Paraquat	D010269	Paraquat	4685-14-7	DTXSID3034799	DTXSID3034799	90	4	2	1	1	2	0	34	0	0	0	0	0	0	1	0	0	0	1	2	1	0	0	0	0	0	0	0	0	0	0	1	0	0	0	0	0	0	17	0	0	0	0	0
Penicillin G	D010400	Penicillin G	75333-20-9	DTXSID50226293	DTXSID50226293	90	28	0	0	7	2	0	0	2	4	0	0	1	0	0	1	0	6	0	9	0	1	0	3	0	0	2	0	1	0	1	0	0	2	1	0	0	0	0	0	1	0	0	0
Doxorubicin	D004317	Doxorubicin	23214-92-8	DTXSID8021480	DTXSID8021480	89	3	4	9	6	3	0	1	1	0	0	4	3	0	0	25	1	0	1	0	1	1	0	0	1	1	1	0	1	0	0	0	0	0	1	1	1	0	0	0	0	0	0	1
Erythromycin	D004917	Erythromycin	114-07-8	DTXSID4022991	DTXSID4022991	89	2	0	1	0	0	1	0	0	2	2	0	1	0	0	1	0	0	2	0	11	0	0	0	0	0	0	0	12	0	0	17	0	0	1	0	0	0	0	1	6	0	0	0
Mianserin	D008803	Mianserin	24219-97-4	DTXSID6023317	DTXSID6023317	89	6	0	0	0	1	2	0	2	2	1	0	0	7	0	1	3	1	0	6	0	0	2	2	3	0	3	4	0	0	0	1	0	0	2	0	0	0	0	2	0	0	0	0
Ephedrine	D004809	Ephedrine	50-98-6	DTXSID1045825	DTXSID1045825	87	6	3	0	0	2	1	1	0	12	3	0	2	0	5	0	0	4	2	0	0	0	0	0	2	0	1	3	0	7	0	0	0	0	0	0	0	1	0	0	0	2	0	0
Nitrofurantoin	D009582	Nitrofurantoin	54-87-5	DTXSID80202308	DTXSID80202308	87	1	6	22	0	1	0	0	0	1	0	0	0	0	0	7	0	0	0	0	0	3	0	0	0	0	0	0	1	0	0	0	27	0	0	2	0	0	0	0	0	0	0	0
Prednisolone	D011239	Prednisolone	50-24-8	DTXSID9021184	DTXSID9021184	87	1	0	0	2	14	0	0	1	0	1	0	0	1	0	0	0	0	0	0	0	1	0	0	0	0	1	1	0	0	2	0	0	0	0	0	1	0	0	0	0	0	0	1
Mefloquine	D015767	Mefloquine	53230-10-7	DTXSID4037168	DTXSID4037168	86	13	14	0	3	0	0	0	0	8	0	1	5	2	0	1	0	1	0	1	1	0	2	0	3	0	5	5	0	0	0	0	2	0	0	0	0	0	0	0	0	0	1	0
Pentazocine	D010423	Pentazocine	359-83-1	DTXSID7023433	DTXSID7023433	85	7	0	0	0	16	0	0	3	21	2	0	1	1	1	1	0	0	1	0	0	0	0	1	0	1	2	0	0	0	0	0	0	0	0	0	0	0	0	0	0	0	2	2
Vinblastine	D014747	Vinblastine	18556-44-0	DTXSID7047853	DTXSID7047853	85	1	19	20	1	2	0	0	1	0	0	0	1	0	0	10	0	0	0	0	0	0	0	0	0	0	0	0	0	1	0	1	0	1	0	0	0	0	0	8	0	0	0	2
Dabigatran	D000069604	Dabigatran	211914-51-1	DTXSID50175419	DTXSID50175419	84	0	0	0	0	0	0	0	1	0	0	0	0	0	22	0	0	0	0	0	0	0	0	0	0	0	0	0	0	11	0	0	0	0	0	0	0	0	0	0	0	39	0	0
docetaxel	C067311	docetaxel	114977-28-5	DTXSID0040464	DTXSID0040464	84	0	17	27	2	2	0	0	0	0	0	0	0	0	0	6	0	0	1	0	0	0	0	0	0	2	0	1	0	0	0	0	3	0	0	1	0	0	0	1	0	0	0	1
Lysergic Acid Diethylamide	D008238	Lysergic Acid Diethylamide	50-37-3	DTXSID1023231	DTXSID1023231	84	1	0	0	1	0	0	0	2	31	1	0	0	2	0	0	0	0	0	0	0	0	0	1	0	0	3	0	0	0	0	0	0	0	0	0	0	0	0	0	1	0	2	0
Rotenone	D012402	Rotenone	83-79-4	DTXSID6021248	DTXSID6021248	84	0	0	1	0	0	1	29	1	0	2	0	0	0	0	0	0	0	0	0	0	0	0	0	1	0	0	0	0	0	0	0	0	0	0	0	0	0	27	0	0	0	0	0
Ticlopidine	D013988	Ticlopidine	53885-35-1	DTXSID80202141	DTXSID80202141	84	0	2	2	1	2	0	0	0	1	0	0	0	0	19	0	0	0	1	0	0	0	0	0	0	0	0	0	0	17	1	0	0	0	1	0	0	0	0	0	0	12	0	0
Acrylamide	D020106	Acrylamide	79-06-1	DTXSID5020027	DTXSID5020027	83	0	29	21	2	0	0	0	0	0	0	0	1	0	0	1	0	0	4	0	0	2	0	0	0	0	0	0	0	0	0	0	1	0	0	0	0	0	0	0	0	0	0	0
Cuprizone	D003471	Cuprizone	370-81-0	DTXSID30861909	DTXSID30861909	83	0	0	1	5	0	0	0	0	0	0	0	1	0	0	0	0	0	0	0	0	0	0	0	0	0	0	0	0	0	0	0	0	0	0	0	1	0	0	0	0	0	0	0
Digoxin	D004077	Digoxin	20830-75-5	DTXSID5022934	DTXSID5022934	83	1	2	0	2	0	0	0	1	4	0	1	2	6	0	0	0	1	1	2	0	1	4	0	0	0	1	0	0	1	1	0	0	0	1	0	0	1	0	0	0	0	0	0
Clomipramine	D002997	Clomipramine	303-49-1	DTXSID6022844	DTXSID6022844	82	8	1	0	0	1	3	0	1	4	6	1	2	4	0	0	2	7	0	0	0	0	2	4	3	0	1	3	0	0	1	0	0	0	0	0	0	10	0	4	0	0	0	0
Ethylene Glycol	D019855	Ethylene Glycol	107-21-1	DTXSID8020597	DTXSID8020597	82	4	3	0	3	0	1	1	14	0	0	0	3	1	1	0	0	0	1	0	0	2	2	0	0	0	0	0	0	1	1	2	0	0	0	0	4	0	0	0	0	0	0	0
Lindane	D001556	Lindane	58-89-9	DTXSID2020686	DTXSID2020686	82	49	8	0	1	1	0	0	0	2	3	0	4	0	0	0	0	0	0	1	0	0	0	0	0	0	2	0	0	0	0	0	1	1	0	0	0	0	0	0	0	0	0	0
Linezolid	D000069349	Linezolid	165800-03-3	DTXSID5046489	DTXSID5046489	82	0	2	22	2	0	0	0	0	2	1	0	0	1	0	0	0	0	0	0	0	0	1	1	0	0	0	0	0	0	1	0	2	0	0	0	0	0	0	1	0	0	0	0
domoic acid	C012301	domoic acid	14277-97-5	DTXSID20274180	DTXSID20274180	80	21	13	0	4	0	0	0	0	0	2	5	1	0	0	0	0	1	0	7	0	2	0	4	1	0	0	0	0	0	0	0	0	0	0	0	0	0	0	0	0	0	8	2
Triazolam	D014229	Triazolam	28911-01-5	DTXSID6046763	DTXSID6046763	80	5	0	0	0	0	0	0	4	5	0	6	1	7	0	0	0	0	4	0	0	0	4	1	3	0	0	11	0	0	0	0	0	0	0	0	0	0	0	0	0	0	20	0
efavirenz	C098320	efavirenz	154598-52-4	DTXSID9046029	DTXSID9046029	79	2	9	0	1	0	0	0	0	2	0	0	26	0	0	0	0	0	2	0	0	0	0	1	10	0	0	9	0	0	0	0	0	0	0	0	0	0	0	0	0	0	0	0
Etomidate	D005045	Etomidate	33125-97-2	DTXSID5023033	DTXSID5023033	79	6	0	0	0	0	0	0	0	0	1	1	0	0	0	0	1	56	0	3	0	0	0	0	0	0	3	0	0	0	0	0	0	0	0	0	0	0	0	0	0	0	0	0
Chloramphenicol	D002701	Chloramphenicol	56-75-7	DTXSID7020265	DTXSID7020265	78	1	3	1	0	1	0	0	0	0	0	0	2	1	2	1	0	0	1	0	1	1	0	0	1	0	0	0	2	0	1	2	1	1	0	0	2	0	0	0	6	0	0	0
clopidogrel	C055162	clopidogrel	744256-69-7	DTXSID30225441	DTXSID30225441	78	0	1	2	0	0	0	0	0	1	0	0	0	0	19	0	0	0	0	0	0	0	0	0	0	0	0	0	0	17	1	0	0	0	1	0	0	0	0	0	0	12	0	0
Hexachlorophene	D006582	Hexachlorophene	70-30-4	DTXSID6020690	DTXSID6020690	78	3	6	2	23	0	0	0	1	0	1	0	10	0	0	0	0	0	0	0	0	9	0	0	0	0	0	0	0	0	2	0	0	1	0	0	8	0	0	0	0	0	0	0
Nitroglycerin	D005996	Nitroglycerin	55-63-0	DTXSID1021407	DTXSID1021407	78	0	0	1	0	0	0	0	0	0	1	0	0	0	1	1	0	0	0	0	0	1	0	0	0	5	0	1	0	0	0	0	0	0	4	0	3	7	0	0	0	0	0	0
Amikacin	D000583	Amikacin	37517-28-5	DTXSID3022586	DTXSID3022586	77	0	0	0	0	0	0	0	0	0	0	0	0	0	0	0	0	0	0	0	29	0	0	0	0	0	0	0	26	0	0	8	0	0	0	0	0	0	0	0	1	0	0	0
Trimethoprim, Sulfamethoxazole Drug Combination	D015662	Trimethoprim, Sulfamethoxazole Drug Combination	8064-90-2	DTXSID0032233	DTXSID0032233	77	3	1	1	0	0	0	0	1	4	7	0	0	2	0	0	0	3	2	0	0	0	0	0	0	0	0	0	0	0	0	0	0	0	0	2	0	1	0	0	0	0	0	0
Capsaicin	D002211	Capsaicin	404-86-4	DTXSID9020241	DTXSID9020241	76	0	4	1	0	0	0	0	0	0	0	0	0	0	0	4	0	0	0	0	0	0	0	0	0	42	0	0	0	0	0	0	0	0	0	0	0	0	0	0	0	0	0	0
Diphenhydramine	D004155	Diphenhydramine	88637-37-0	DTXSID80237211	DTXSID80237211	76	14	3	1	0	0	2	0	5	13	0	0	1	7	0	0	5	1	0	0	0	1	0	4	0	0	0	1	0	0	0	0	0	0	0	1	1	0	0	0	0	0	2	0
Isoflurophate	D007531	Isoflurophate	55-91-4	DTXSID1040667	DTXSID1040667	76	10	13	9	3	1	0	0	0	0	2	3	2	0	0	0	0	0	7	1	0	2	0	4	0	0	0	0	0	0	0	0	0	1	0	0	0	0	0	0	0	0	0	1
Thioridazine	D013881	Thioridazine	50-52-2	DTXSID6023656	DTXSID6023656	75	0	1	0	2	0	5	9	5	0	1	1	1	2	0	0	4	1	1	0	0	0	1	0	2	0	1	1	0	0	1	0	0	1	0	0	2	1	0	2	0	0	0	0
ziprasidone	C092292	ziprasidone	138982-67-9	DTXSID00160855	DTXSID00160855	74	1	0	0	0	0	13	3	1	2	0	0	1	1	0	0	17	0	0	0	0	0	0	0	0	0	0	2	0	1	0	0	0	0	0	0	0	1	3	0	0	0	0	0
Tramadol	D014147	Tramadol	27203-92-5	DTXSID90858931	DTXSID90858931	73	34	0	0	0	0	0	0	0	5	2	1	1	2	0	0	0	2	0	6	0	0	1	1	1	2	1	1	0	0	0	0	0	0	0	0	0	0	0	0	0	0	0	0
3-nitropropionic acid	C015392	3-nitropropionic acid	504-88-1	DTXSID1020982	DTXSID1020982	72	2	2	1	5	0	2	1	0	0	0	2	1	0	0	0	2	0	0	0	0	0	0	0	0	0	0	0	0	0	0	0	0	0	0	0	0	0	0	0	0	0	0	0
Dronabinol	D013759	Dronabinol	1972-08-3	DTXSID6021327	DTXSID6021327	72	6	1	0	1	0	0	0	1	3	1	20	1	0	0	0	0	0	2	0	0	0	1	0	2	1	1	0	0	0	0	0	0	0	0	0	0	1	0	0	0	0	2	0
Tamoxifen	D013629	Tamoxifen	54965-24-1	DTXSID8021301	DTXSID8021301	72	2	1	0	1	0	0	0	1	0	0	7	1	0	2	1	0	0	0	0	0	0	0	0	2	1	0	4	0	11	0	0	0	0	2	0	0	0	0	0	0	0	0	0
Minocycline	D008911	Minocycline	13614-98-7	DTXSID8044545	DTXSID8044545	70	0	0	2	0	2	0	0	0	0	0	0	2	0	0	1	0	0	1	0	0	1	0	0	0	1	0	0	0	0	0	0	0	0	0	1	0	0	1	0	0	0	0	0
Fluvoxamine	D016666	Fluvoxamine	89035-92-7	DTXSID60237496	DTXSID60237496	69	8	0	0	0	0	4	1	2	2	3	0	1	1	0	1	5	3	1	1	0	0	2	2	1	0	2	7	0	0	0	0	0	0	1	0	0	1	0	6	0	0	1	1
Ofloxacin	D015242	Ofloxacin	100986-86-5	DTXSID1058715	DTXSID1058715	69	17	1	0	1	4	0	0	0	3	0	0	5	6	0	0	0	0	0	1	1	0	4	2	2	0	0	4	1	0	0	0	0	0	2	1	0	0	0	0	0	0	0	0
Copper	D003300	Copper	7440-50-8	DTXSID2023985	DTXSID2023985	68	1	6	2	6	3	0	2	1	1	0	5	1	0	0	0	1	0	1	0	0	1	0	0	0	0	0	0	0	0	1	0	0	0	0	2	1	0	2	0	0	0	0	0
Halothane	D006221	Halothane	151-67-7	DTXSID4025371	DTXSID4025371	68	5	2	0	4	4	0	0	4	1	1	2	0	2	0	0	0	0	0	1	0	1	0	0	1	1	0	0	1	0	0	0	1	2	0	11	0	0	0	0	0	0	1	0
Zinc	D015032	Zinc	7440-66-6	DTXSID7035012	DTXSID7035012	68	4	3	5	1	1	0	0	1	1	0	1	1	0	0	6	0	0	0	0	0	1	0	0	0	0	0	0	0	1	0	0	3	0	0	0	0	0	0	0	0	0	0	1
Chlorpyrifos	D004390	Chlorpyrifos	2921-88-2	DTXSID4020458	DTXSID4020458	67	3	13	10	1	0	0	0	1	0	1	7	2	0	0	0	0	1	0	0	0	3	0	0	0	0	0	0	0	0	0	0	1	0	0	0	0	0	1	0	0	0	0	2
Lovastatin	D008148	Lovastatin	75330-75-5	DTXSID5020784	DTXSID5020784	67	0	1	3	0	31	0	0	0	0	0	1	0	0	0	0	0	0	0	0	0	0	0	0	7	0	0	1	0	0	0	0	0	0	0	0	0	1	1	0	0	0	0	0
Phenelzine	D010624	Phenelzine	51-71-8	DTXSID2041094	DTXSID2041094	67	2	0	1	0	0	0	2	2	4	1	0	3	6	2	2	1	5	1	0	0	0	1	0	4	0	3	2	0	0	0	0	0	1	2	1	1	6	0	1	0	0	0	1
Prochlorperazine	D011346	Prochlorperazine	84-02-6	DTXSID1049015	DTXSID1049015	67	1	2	0	0	4	10	9	0	0	1	0	0	0	0	0	16	0	0	0	0	0	0	0	0	0	0	0	0	0	0	0	0	5	0	1	0	0	0	0	0	0	0	0
Cadmium	D002104	Cadmium	7440-43-9	DTXSID1023940	DTXSID1023940	66	0	11	1	2	0	0	0	0	0	0	3	2	0	1	0	0	0	0	0	1	0	0	0	0	0	0	0	1	1	0	0	2	0	0	0	1	0	0	0	0	0	0	0
Cyclophosphamide	D003520	Cyclophosphamide	60030-72-0	DTXSID00208761	DTXSID00208761	66	6	4	2	3	1	0	0	0	0	0	4	0	0	4	1	0	0	0	0	0	0	0	0	1	0	0	0	0	0	0	0	1	0	0	0	0	0	0	8	1	0	0	1
Procaine	D011343	Procaine	59-46-1	DTXSID7045021	DTXSID7045021	66	12	6	6	0	0	0	1	0	1	0	0	0	0	0	0	0	0	1	0	0	7	0	0	0	0	2	0	0	0	2	0	0	0	1	0	1	0	0	0	0	0	1	0
Styrene	D020058	Styrene	100-42-5	DTXSID2021284	DTXSID2021284	65	0	10	3	0	0	0	0	0	1	0	1	3	0	0	0	0	0	0	0	13	0	0	0	0	0	0	0	1	0	0	2	0	0	0	0	0	1	0	0	2	0	0	0
Trazodone	D014196	Trazodone	19794-93-5	DTXSID5045043	DTXSID5045043	64	8	1	0	0	0	1	2	3	4	3	0	1	3	0	1	3	4	1	0	0	0	1	0	3	0	2	3	0	1	0	0	0	1	3	0	1	2	1	0	0	0	1	0
Amoxapine	D000657	Amoxapine	14028-44-5	DTXSID7022598	DTXSID7022598	63	19	2	0	1	1	8	6	6	1	0	0	2	0	0	0	3	0	0	0	0	0	0	3	0	0	1	0	0	0	0	0	0	0	1	0	0	0	0	0	0	0	0	0
Capecitabine	D000069287	Capecitabine	154361-50-9	DTXSID3046451	DTXSID3046451	63	0	1	13	2	1	0	0	1	0	0	0	1	0	0	18	2	0	0	1	0	1	0	0	0	0	0	0	0	1	0	0	1	0	0	0	2	0	0	0	0	0	0	1
Hydrogen Sulfide	D006862	Hydrogen Sulfide	13465-07-1	DTXSID10158844	DTXSID10158844	63	2	9	2	6	0	0	0	5	0	0	1	2	0	1	0	0	0	0	0	0	0	0	0	0	3	0	0	0	1	0	0	1	0	0	0	2	0	0	0	0	0	0	0
Iopamidol	D007479	Iopamidol	60166-93-0	DTXSID1023158	DTXSID1023158	63	12	2	0	0	1	0	0	0	0	0	0	1	0	0	0	0	0	0	2	1	1	0	1	0	0	1	0	0	0	0	1	0	0	0	0	0	0	0	0	1	0	1	0
Ethacrynic Acid	D004976	Ethacrynic Acid	6500-81-8	DTXSID10215320	DTXSID10215320	62	0	0	0	0	0	0	0	0	1	0	0	0	0	0	0	0	0	0	0	2	0	0	1	0	0	0	0	18	0	0	3	0	0	0	2	0	0	0	0	25	0	0	0
Piracetam	D010889	Piracetam	7491-74-9	DTXSID5044491	DTXSID5044491	62	4	0	0	2	0	1	1	0	1	1	0	1	2	0	0	0	1	0	2	0	0	1	1	6	0	1	3	0	0	0	0	1	0	0	0	0	0	1	1	0	0	0	0
tri-o-cresyl phosphate	C025541	tri-o-cresyl phosphate	78-30-8	DTXSID6032192	DTXSID6032192	62	0	26	10	0	0	0	0	0	0	0	0	2	0	0	0	0	0	13	0	0	6	0	0	0	0	0	0	0	0	0	0	0	0	0	0	0	0	0	0	0	0	0	1
Urea	D014508	Urea	57-13-6	DTXSID4021426	DTXSID4021426	62	9	3	3	1	1	1	0	1	0	2	0	1	0	0	0	0	1	3	0	0	3	0	0	0	0	0	0	0	1	0	0	0	0	0	2	1	0	0	0	0	0	0	0
Ergotamine	D004878	Ergotamine	113-15-5	DTXSID9043774	DTXSID9043774	61	2	0	2	1	2	0	0	1	0	0	0	0	1	1	4	2	0	0	0	0	0	0	0	0	0	0	0	0	0	1	0	0	0	0	0	0	0	0	0	0	0	0	0
Maprotiline	D008376	Maprotiline	58902-67-3	DTXSID30207646	DTXSID30207646	61	19	0	0	0	0	0	0	3	3	1	0	1	2	0	0	0	1	0	4	0	0	1	2	1	0	11	0	0	0	0	0	0	0	0	0	0	1	0	0	0	0	0	0
Omeprazole	D009853	Omeprazole	73590-58-6	DTXSID6021080	DTXSID6021080	61	1	1	1	1	2	0	0	0	1	0	0	0	1	0	3	0	1	1	0	0	0	1	0	0	0	0	0	0	1	6	0	0	0	2	2	0	1	0	0	4	0	1	0
Penicillin G Procaine	D010402	Penicillin G Procaine	6130-64-9	DTXSID40210207	DTXSID40210207	61	7	1	0	0	1	0	0	0	16	0	0	1	0	0	1	0	0	0	0	0	0	1	0	0	0	2	0	5	0	0	0	0	0	1	0	1	0	0	0	0	0	0	0
Strychnine	D013331	Strychnine	57-24-9	DTXSID6023600	DTXSID6023600	61	36	0	0	0	1	0	0	0	0	0	0	0	1	0	0	0	1	1	0	0	2	0	0	0	0	3	0	0	0	0	0	0	0	0	0	0	0	0	0	0	0	0	1
sultopride	C012052	sultopride	71675-85-9	DTXSID5042613	DTXSID5042613	61	1	0	0	0	0	10	1	1	0	2	0	0	0	0	0	8	0	0	0	0	0	0	0	0	0	0	1	0	0	0	0	0	0	0	0	0	0	0	0	0	0	0	0
Clonazepam	D002998	Clonazepam	1622-61-3	DTXSID1022845	DTXSID1022845	60	7	2	0	1	0	1	2	2	1	1	0	0	0	0	1	0	0	8	7	0	0	1	2	2	0	3	1	0	0	0	0	0	2	1	0	0	0	0	0	0	0	0	0
cefepime	C043266	cefepime	123171-59-5	DTXSID7045603	DTXSID7045603	59	5	2	0	9	0	0	0	1	2	1	0	0	3	0	0	0	6	0	2	0	0	5	12	0	0	1	0	0	1	0	0	0	0	0	0	0	0	0	0	0	0	0	0
Ribavirin	D012254	Ribavirin	36791-04-5	DTXSID8023557	DTXSID8023557	59	1	1	0	1	1	0	1	1	0	0	0	0	0	1	0	0	0	0	0	1	0	0	0	0	0	0	1	2	0	0	3	0	0	0	1	0	0	0	0	0	0	0	0
Tobramycin	D014031	Tobramycin	32986-56-4	DTXSID8023680	DTXSID8023680	59	1	0	0	0	0	0	0	0	0	0	0	0	2	0	0	0	0	1	0	10	1	0	0	0	0	0	0	21	0	0	5	0	0	0	0	0	0	0	0	5	0	0	0
Vecuronium Bromide	D014673	Vecuronium Bromide	86029-43-8	DTXSID1044146	DTXSID1044146	59	0	1	1	0	8	0	0	0	0	0	0	0	0	0	0	0	0	0	0	0	21	0	0	0	0	0	0	0	0	0	0	1	0	0	0	0	0	0	0	0	0	0	3
Flunarizine	D005444	Flunarizine	30484-77-6	DTXSID80184554	DTXSID80184554	57	0	0	0	1	0	13	21	0	1	5	0	0	0	0	0	1	0	0	0	0	0	0	0	0	0	0	2	0	0	0	0	0	3	0	0	0	0	3	0	0	0	0	0
Verapamil	D014700	Verapamil	52-53-9	DTXSID9041152	DTXSID9041152	57	8	5	0	0	1	0	1	4	0	0	0	1	1	0	0	2	3	1	0	0	0	2	0	0	0	0	0	1	0	1	0	0	0	2	0	0	2	0	0	0	0	0	0
Dapsone	D003622	Dapsone	80-08-0	DTXSID4020371	DTXSID4020371	56	0	2	20	0	0	0	0	1	1	0	0	0	0	0	1	0	0	0	0	0	0	0	0	0	0	0	1	0	0	0	0	3	1	1	0	0	0	0	0	0	0	0	5
donepezil	C076946	donepezil	120014-06-4	DTXSID8048317	DTXSID8048317	56	2	0	0	1	0	5	0	0	2	2	1	0	1	0	0	3	1	0	0	0	1	2	0	6	0	0	4	0	0	0	0	0	0	8	0	0	0	2	0	0	0	0	0
etiracetam	C026098	etiracetam	33996-58-6	DTXSID5046510	DTXSID5046510	56	4	0	0	1	0	0	1	0	1	1	0	1	2	0	0	0	1	0	2	0	0	0	1	4	0	1	3	0	0	0	0	1	0	0	0	0	0	1	1	0	0	0	0
Quinolinic Acid	D017378	Quinolinic Acid	87314-99-6	DTXSID20236283	DTXSID20236283	56	15	6	0	5	0	0	0	0	0	0	3	0	0	0	0	0	0	1	1	0	0	0	1	0	0	0	0	0	0	0	2	0	1	0	0	0	0	0	0	0	0	0	0
Albuterol	D000420	Albuterol	18559-94-9	DTXSID5021255	DTXSID5021255	55	1	0	0	0	5	0	0	0	1	34	0	0	0	0	0	0	1	0	0	0	0	1	0	0	0	0	0	0	1	0	0	0	0	1	0	0	1	0	0	0	0	0	0
Dizocilpine Maleate	D016291	Dizocilpine Maleate	77086-21-6	DTXSID3048447	DTXSID3048447	55	3	2	0	3	0	0	1	0	0	0	9	1	0	0	0	1	0	6	2	0	0	0	0	0	0	0	0	0	0	0	0	0	1	0	0	0	0	0	0	0	0	7	0
mirtazapine	C035133	mirtazapine	61337-67-5	DTXSID0023325	DTXSID0023325	55	2	0	0	0	1	1	0	1	2	1	0	0	2	0	1	3	0	0	1	0	0	1	2	2	0	0	3	0	0	0	0	0	0	1	0	0	0	0	2	0	0	0	0
Nalidixic Acid	D009268	Nalidixic Acid	389-08-2	DTXSID3020912	DTXSID3020912	55	11	1	0	1	1	0	0	1	1	0	0	2	0	0	0	0	0	0	0	0	1	1	0	0	0	0	0	1	0	0	0	0	0	0	0	0	0	0	0	1	0	0	0
Water	D014867	Water	7732-18-5	DTXSID6026296	DTXSID6026296	55	13	0	1	2	0	0	0	3	0	0	0	0	0	0	0	0	0	0	0	0	0	0	0	0	0	5	0	0	0	0	0	0	0	0	0	15	0	0	8	0	0	0	0
Clarithromycin	D017291	Clarithromycin	81103-11-9	DTXSID3022829	DTXSID3022829	54	0	1	0	0	1	0	0	0	9	0	0	2	7	0	1	0	0	0	0	0	0	2	1	1	0	0	2	0	1	0	2	0	0	1	1	0	0	0	0	0	1	0	1
Dextropropoxyphene	D011431	Dextropropoxyphene	1639-60-7	DTXSID6048913	DTXSID6048913	54	15	1	0	1	2	0	0	6	2	1	0	2	1	0	0	0	0	2	1	0	0	0	0	0	0	0	1	1	0	0	0	0	0	0	0	1	0	0	0	1	0	0	0
Ranitidine	D011899	Ranitidine	71130-06-8	DTXSID0052835	DTXSID0052835	54	5	2	0	0	0	0	0	0	3	0	1	4	3	0	0	3	0	0	0	0	0	17	0	0	0	0	1	0	0	0	0	0	0	0	1	0	0	0	0	0	0	0	0
Trifluoperazine	D014268	Trifluoperazine	117-89-5	DTXSID1046928	DTXSID1046928	54	1	0	0	0	0	7	9	1	0	1	0	0	1	0	0	4	0	0	0	0	1	0	0	0	0	0	2	0	0	0	0	0	10	1	0	0	1	0	2	0	0	1	0
1-Naphthylamine	D015057	1-Naphthylamine	134-32-7	DTXSID7020920	DTXSID7020920	53	2	2	0	1	0	3	4	1	2	3	0	1	1	0	1	4	2	0	0	0	0	0	0	0	0	0	2	0	0	0	0	0	0	0	0	0	1	0	12	0	0	0	1
2,5-hexanedione	C011269	2,5-hexanedione	110-13-4	DTXSID8030138	DTXSID8030138	53	1	13	19	1	0	0	0	0	0	0	1	1	0	0	0	0	0	4	0	0	2	0	0	0	0	0	0	0	0	0	0	1	0	0	0	1	0	0	0	0	0	0	1
Diethylstilbestrol	D004054	Diethylstilbestrol	56-53-1	DTXSID3020465	DTXSID3020465	53	0	1	0	0	0	0	0	0	0	0	1	0	0	0	0	0	0	0	0	0	0	0	0	0	0	0	0	0	0	0	0	0	0	0	0	0	0	0	0	1	0	0	0
Imipenem	D015378	Imipenem	64221-86-9	DTXSID2023143	DTXSID2023143	53	32	0	0	2	0	0	0	0	0	2	0	3	0	0	0	0	3	0	3	0	0	1	1	0	0	0	0	0	0	0	0	0	0	0	0	0	0	0	0	0	0	0	0
Ivermectin	D007559	Ivermectin	70288-86-7	DTXSID7040235	DTXSID7040235	53	4	6	1	3	0	0	0	6	0	1	0	8	0	0	0	0	1	4	1	0	1	1	0	0	0	0	0	0	0	5	0	1	0	0	0	0	5	0	0	0	0	0	0
Perphenazine	D010546	Perphenazine	58-39-9	DTXSID1023441	DTXSID1023441	53	0	1	0	0	2	13	4	0	1	0	0	0	2	0	0	4	0	0	1	0	1	0	0	1	0	0	1	0	0	0	0	0	7	1	0	0	1	0	0	0	0	0	1
Epinephrine	D004837	Epinephrine	97289-42-4	DTXSID80242845	DTXSID80242845	52	8	1	1	0	1	0	0	0	0	3	0	0	0	4	0	0	0	0	1	0	1	0	0	0	2	1	0	0	2	3	1	0	0	2	0	0	0	0	0	0	0	0	0
Levamisole	D007978	Levamisole	16595-80-5	DTXSID7047518	DTXSID7047518	52	3	4	0	4	3	0	0	1	0	0	0	0	0	0	0	0	0	1	0	0	1	1	0	0	0	0	0	0	0	0	0	0	0	0	0	0	0	0	1	0	0	0	0
Levofloxacin	D064704	Levofloxacin	100986-85-4	DTXSID0041060	DTXSID0041060	52	10	0	1	0	3	0	0	1	2	0	0	3	6	0	1	0	0	0	0	0	1	4	1	0	0	0	1	0	0	0	0	0	0	2	1	0	0	0	0	0	0	1	0
Trichlorfon	D014236	Trichlorfon	52-68-6	DTXSID0021389	DTXSID0021389	52	2	7	6	2	1	0	0	0	0	3	0	2	0	0	0	0	0	1	0	0	3	0	0	0	0	0	0	0	0	0	0	5	3	0	0	0	0	0	0	0	0	0	1
Formaldehyde	D005557	Formaldehyde	NOCAS_47796	DTXSID5047796	DTXSID5047796	51	0	2	0	2	0	0	0	0	0	0	1	1	0	0	7	0	0	0	0	0	0	0	0	2	8	0	0	0	1	1	0	0	0	1	0	0	0	0	0	0	0	0	0
Misonidazole	D008920	Misonidazole	13551-87-6	DTXSID80864420	DTXSID80864420	51	2	16	21	2	0	0	0	0	0	0	0	2	0	0	1	0	0	0	1	3	0	0	0	0	0	0	0	0	0	0	1	0	0	0	0	0	0	0	0	1	0	0	1
Sodium Chloride	D012965	Sodium Chloride	7647-14-5	DTXSID3021271	DTXSID3021271	51	6	0	0	3	0	0	0	2	0	0	1	2	1	2	0	0	1	0	0	1	1	0	0	0	2	0	0	0	0	0	0	0	0	0	0	7	0	1	0	0	0	0	0
Streptozocin	D013311	Streptozocin	18883-66-4	DTXSID2021282	DTXSID2021282	51	0	1	0	0	0	0	0	0	0	0	10	0	0	0	0	0	0	0	1	0	0	0	0	0	4	0	0	0	0	0	0	0	0	0	0	0	0	0	0	0	0	0	0
tiagabine	C059205	tiagabine	115103-54-3	DTXSID5023663	DTXSID5023663	51	3	2	0	0	0	2	0	0	1	0	0	0	1	0	0	1	0	0	0	0	0	1	26	0	0	1	0	0	0	0	0	0	0	0	0	0	0	0	0	0	0	0	0
Aminophylline	D000628	Aminophylline	63907-40-4	DTXSID90213602	DTXSID90213602	50	23	1	0	3	0	0	0	0	0	1	0	0	0	0	0	1	0	0	3	0	0	0	4	1	0	5	0	0	0	0	0	0	0	0	0	0	0	0	0	0	0	0	0
Quinidine	D011802	Quinidine	56-54-2	DTXSID4023549	DTXSID4023549	50	2	0	0	0	1	0	0	1	1	0	1	1	2	1	0	0	0	0	0	0	0	1	0	0	0	0	1	0	0	0	0	0	0	29	0	0	3	0	0	0	0	0	0
Sumatriptan	D018170	Sumatriptan	103628-46-2	DTXSID4023628	DTXSID4023628	50	1	0	0	0	0	1	0	0	0	0	0	2	0	0	2	4	1	0	0	0	0	0	0	0	1	0	0	0	1	0	0	0	0	0	0	0	0	0	0	0	1	0	0
Tranexamic Acid	D014148	Tranexamic Acid	1197-18-8	DTXSID3045350	DTXSID3045350	50	25	1	0	0	0	0	0	0	0	0	0	0	0	0	0	0	2	0	1	0	0	0	1	0	1	0	0	0	3	0	0	0	0	0	0	0	0	0	0	0	0	0	0
Alprazolam	D000525	Alprazolam	28981-97-7	DTXSID4022577	DTXSID4022577	49	9	2	1	0	0	0	0	4	1	0	2	0	5	0	0	1	1	3	0	0	0	1	1	0	0	1	2	0	0	0	0	0	0	0	0	0	0	0	0	0	0	3	0
Iophendylate	D007481	Iophendylate	99-79-6	DTXSID2052869	DTXSID2052869	49	1	0	0	0	0	0	0	0	0	0	0	0	0	0	0	0	0	0	0	0	0	0	0	0	0	2	0	0	0	1	0	0	0	0	0	0	0	0	0	0	0	0	0
Tetracycline	D013752	Tetracycline	60-54-8	DTXSID7023645	DTXSID7023645	49	1	0	0	4	1	0	0	0	0	0	0	0	0	0	1	0	0	0	0	0	0	0	0	0	0	0	0	0	0	0	0	0	0	0	1	0	0	0	0	0	0	0	0
Nortriptyline	D009661	Nortriptyline	894-71-3	DTXSID2045109	DTXSID2045109	48	3	0	2	0	0	2	1	1	0	2	0	0	3	0	0	0	1	0	0	0	0	1	0	3	0	1	2	1	0	0	0	0	0	3	1	0	11	0	1	0	0	0	0
Rifampin	D012293	Rifampin	13292-46-1	DTXSID6021244	DTXSID6021244	48	6	1	1	1	3	0	0	1	0	0	0	0	0	3	2	0	0	0	0	0	0	0	0	0	1	0	0	1	0	0	0	0	0	0	10	0	0	0	0	0	0	0	0
Triamcinolone Acetonide	D014222	Triamcinolone Acetonide	76-25-5	DTXSID6021371	DTXSID6021371	48	0	0	0	0	7	0	0	0	1	0	0	0	0	0	0	0	0	0	0	0	0	0	0	0	0	0	0	0	0	3	0	0	0	0	0	0	0	0	0	1	0	0	0
Vidarabine	D014740	Vidarabine	5536-17-4	DTXSID80873976	DTXSID80873976	48	0	6	4	3	0	0	0	1	0	4	0	1	0	1	0	0	1	0	0	0	1	0	0	1	0	0	0	0	0	1	0	0	0	0	0	3	0	0	1	1	0	0	0
Carbidopa	D002230	Carbidopa	28860-95-9	DTXSID4022735	DTXSID4022735	47	1	1	3	1	1	0	6	0	5	1	1	0	0	0	0	3	1	0	1	0	0	3	0	0	0	0	0	0	0	0	0	3	3	0	0	0	2	1	0	0	0	0	0
DDT	D003634	DDT	50-29-3	DTXSID4020375	DTXSID4020375	47	10	1	1	2	0	0	0	0	0	15	0	4	0	0	0	0	5	0	1	0	1	0	0	0	0	1	0	0	0	0	0	1	1	0	0	0	0	0	0	0	0	0	0
Droperidol	D004329	Droperidol	548-73-2	DTXSID6022973	DTXSID6022973	47	2	1	0	0	0	17	0	1	0	0	0	0	0	0	0	9	0	0	1	0	1	1	0	0	0	0	0	0	0	0	0	0	1	0	0	0	0	0	0	0	0	1	0
Iothalamate Meglumine	D007482	Iothalamate Meglumine	519-25-5	DTXSID90199856	DTXSID90199856	47	13	0	0	3	0	0	0	0	1	2	0	0	0	0	2	0	1	0	3	0	2	0	1	0	0	0	0	0	0	1	0	0	0	0	0	0	0	0	0	0	0	1	0
Mepivacaine	D008619	Mepivacaine	96-88-8	DTXSID9023259	DTXSID9023259	47	14	5	2	0	0	0	0	0	0	0	0	1	0	0	0	0	0	1	0	0	0	2	0	0	0	1	0	0	0	1	0	0	0	1	0	0	0	0	0	0	0	0	1
Sulfasalazine	D012460	Sulfasalazine	599-79-1	DTXSID0021256	DTXSID0021256	47	6	2	2	3	1	0	0	1	0	0	0	1	0	0	0	0	0	0	0	0	0	0	0	1	0	0	0	0	0	0	0	1	0	0	4	0	0	0	0	1	0	0	0
Ethylene Oxide	D005027	Ethylene Oxide	75-21-8	DTXSID0020600	DTXSID0020600	46	0	11	12	2	1	0	1	0	0	0	0	1	1	0	0	0	0	0	0	0	1	0	0	0	0	0	0	0	0	0	0	0	0	0	0	0	0	0	0	0	0	0	1
methyl bromide	C005218	methyl bromide	74-83-9	DTXSID8020832	DTXSID8020832	46	4	6	6	3	0	0	0	0	0	0	1	2	0	0	1	0	6	1	1	0	0	1	1	1	0	1	0	0	0	0	0	0	0	0	0	0	0	0	0	0	0	0	0
Paliperidone Palmitate	D000068882	Paliperidone Palmitate	199739-10-1	DTXSID70870217	DTXSID70870217	46	2	1	0	0	0	3	0	0	0	2	0	0	3	0	0	5	0	0	0	0	0	0	0	0	0	0	4	0	0	0	0	0	0	0	0	0	1	2	0	0	0	0	0
rofecoxib	C116926	rofecoxib	162011-90-7	DTXSID2023567	DTXSID2023567	46	0	0	0	0	0	0	0	0	1	0	0	0	2	0	1	0	0	0	0	0	0	0	0	0	0	0	0	0	23	0	0	0	0	0	0	0	0	0	0	0	0	0	0
Trihexyphenidyl	D014282	Trihexyphenidyl	52-49-3	DTXSID8045802	DTXSID8045802	46	0	0	0	1	0	4	0	0	10	0	6	0	2	0	0	1	0	0	0	0	0	5	0	1	0	0	0	0	0	1	0	0	4	0	0	0	1	0	0	0	0	0	0
Acetazolamide	D000086	Acetazolamide	1424-27-7	DTXSID00162031	DTXSID00162031	45	1	0	0	0	0	0	0	1	1	0	1	0	1	0	9	0	0	1	0	0	1	3	0	0	1	0	0	0	0	0	0	0	0	0	2	0	0	0	0	0	0	0	0
Dextroamphetamine	D003913	Dextroamphetamine	51-63-8	DTXSID2057865	DTXSID2057865	45	5	0	0	0	0	0	0	0	1	1	1	0	0	1	0	0	1	0	0	0	0	0	0	0	0	0	18	0	0	0	0	0	2	0	0	0	0	0	0	0	0	0	0
oxcarbazepine	C036006	oxcarbazepine	28721-07-5	DTXSID0045703	DTXSID0045703	45	4	1	0	1	0	2	1	3	0	0	1	0	0	0	0	0	1	1	2	0	0	1	3	0	0	0	0	0	0	0	0	0	0	1	0	0	0	0	1	0	0	0	0
Pancuronium	D010197	Pancuronium	16974-53-1	DTXSID7048405	DTXSID7048405	45	0	1	0	0	6	0	0	0	0	0	0	0	0	0	0	0	0	0	0	0	12	0	0	0	0	0	0	0	0	0	1	0	0	0	0	0	0	0	0	0	0	0	4
Rivaroxaban	D000069552	Rivaroxaban	366789-02-8	DTXSID3057723	DTXSID3057723	45	0	0	0	0	1	0	0	0	0	0	0	0	0	16	0	0	0	0	0	0	0	0	0	0	0	0	0	0	1	0	0	0	0	0	0	0	0	0	0	0	16	0	0
Trimethoprim	D014295	Trimethoprim	738-70-5	DTXSID3023712	DTXSID3023712	45	1	0	0	0	0	0	0	0	1	2	0	2	2	0	0	0	1	2	0	0	0	0	0	0	0	0	0	0	0	0	0	0	0	0	1	0	0	0	0	0	0	0	0
trimethyltin	C046488	trimethyltin	1631-73-8	DTXSID6035102	DTXSID6035102	45	8	3	0	3	0	0	0	0	1	4	5	1	0	0	0	0	0	1	0	2	0	1	0	0	0	0	0	0	0	0	0	0	0	0	0	0	0	0	0	0	0	0	0
1-Methyl-4-phenylpyridinium	D015655	1-Methyl-4-phenylpyridinium	39794-99-5	DTXSID8041826	DTXSID8041826	44	0	4	0	2	0	1	22	0	0	0	0	1	0	0	0	0	0	0	0	0	0	0	0	0	0	0	0	0	0	0	0	0	1	0	0	0	0	6	0	0	0	0	0
Clomiphene	D002996	Clomiphene	14158-65-7	DTXSID40747361	DTXSID40747361	44	1	0	0	0	0	0	0	0	1	0	0	0	1	0	0	0	0	0	0	0	0	0	0	1	0	0	0	0	0	0	0	0	1	0	0	0	0	0	0	0	0	0	0
Endosulfan	D004726	Endosulfan	115-29-7	DTXSID1020560	DTXSID1020560	44	13	2	0	1	1	1	0	2	0	3	0	1	0	0	0	0	0	0	2	0	0	0	4	0	0	3	0	0	0	1	0	0	0	0	0	1	0	0	0	0	0	0	0
Flunitrazepam	D005445	Flunitrazepam	1622-62-4	DTXSID7023065	DTXSID7023065	44	1	0	0	0	0	0	0	9	0	0	2	1	0	0	0	0	0	1	0	0	0	5	2	1	0	1	0	0	0	0	0	0	0	0	0	0	0	0	0	0	0	6	0
Galactose	D005690	Galactose	59-23-4	DTXSID0023088	DTXSID0023088	44	2	0	4	1	0	0	0	0	0	0	16	0	0	0	0	0	0	0	0	1	0	0	0	0	0	0	0	0	0	0	0	0	0	0	0	0	0	0	0	0	0	0	0
Iron	D007501	Iron	7439-89-6	DTXSID5043710	DTXSID5043710	44	2	1	0	1	1	1	4	0	0	1	5	2	0	0	0	0	0	0	3	0	0	0	0	0	0	0	0	0	1	0	0	0	0	0	1	0	0	1	0	0	0	0	0
Magnesium Sulfate	D008278	Magnesium Sulfate	10034-99-8	DTXSID5040544	DTXSID5040544	44	1	0	0	0	2	0	0	0	0	0	0	2	1	7	1	0	0	0	0	0	4	0	0	0	2	0	0	0	0	0	0	0	0	0	0	0	0	0	0	0	0	0	6
Nifedipine	D009543	Nifedipine	60299-11-8	DTXSID90209045	DTXSID90209045	44	2	4	0	0	0	1	0	0	0	0	0	0	0	0	1	1	2	0	0	0	1	2	0	1	0	0	0	0	0	2	0	0	0	2	0	0	5	0	0	0	0	0	2
Thiopental	D013874	Thiopental	71-73-8	DTXSID1021744	DTXSID1021744	44	1	1	0	0	2	0	0	11	0	2	1	0	2	0	0	1	2	1	0	0	3	0	1	0	1	0	0	0	0	0	0	0	0	0	0	0	0	0	0	0	0	3	0
4-Aminopyridine	D015761	4-Aminopyridine	504-24-5	DTXSID0023870	DTXSID0023870	43	25	0	0	0	0	0	0	0	0	0	1	0	0	1	2	1	0	0	4	0	0	1	3	0	0	1	0	0	0	0	0	0	0	0	0	0	0	0	0	0	0	0	0
Heparin, Low-Molecular-Weight	D006495	Heparin, Low-Molecular-Weight	9005-49-6	DTXSID20872761	DTXSID20872761	43	0	0	0	0	5	0	0	0	0	0	0	0	0	11	0	0	0	0	0	0	0	0	0	0	0	0	0	0	2	0	0	0	0	1	0	0	0	0	0	0	6	0	0
Zalcitabine	D016047	Zalcitabine	7481-89-2	DTXSID0023747	DTXSID0023747	43	0	2	22	0	0	0	0	0	0	0	0	0	0	0	0	0	0	0	0	0	0	0	0	0	4	0	0	0	0	0	2	1	0	0	0	0	0	0	0	1	0	0	0
Buprenorphine	D002047	Buprenorphine	53152-21-9	DTXSID2048905	DTXSID2048905	42	1	0	0	1	0	0	0	1	2	0	0	0	1	0	0	0	0	1	0	0	0	2	0	0	4	0	1	0	1	0	0	0	0	0	0	0	0	0	0	0	1	0	0
Crack Cocaine	D016578	Crack Cocaine	50-36-2	DTXSID2038443	DTXSID2038443	42	3	0	0	1	0	0	0	0	1	0	2	1	0	3	0	1	0	1	0	0	0	0	1	0	0	0	0	0	2	0	0	0	0	0	0	0	0	0	0	0	0	0	0
Stavudine	D018119	Stavudine	3056-17-5	DTXSID1023819	DTXSID1023819	42	0	1	30	0	0	0	0	0	0	0	0	0	0	0	0	0	0	0	0	0	0	0	0	0	2	0	0	1	0	0	0	1	0	0	0	0	0	0	0	0	0	0	2
Chlordecone	D007631	Chlordecone	143-50-0	DTXSID1020770	DTXSID1020770	41	3	10	2	0	0	0	0	0	0	19	0	1	0	0	0	0	0	1	0	0	0	0	0	0	0	0	0	0	0	0	0	0	0	0	0	0	0	0	0	0	0	0	0
Diatrizoate	D003973	Diatrizoate	737-31-5	DTXSID7022912	DTXSID7022912	41	11	2	0	1	1	0	1	0	0	0	0	3	0	1	1	0	2	0	1	0	1	0	0	0	0	1	0	0	0	0	0	0	0	1	0	3	0	0	0	0	0	0	0
Ondansetron	D017294	Ondansetron	99614-58-1	DTXSID60244165	DTXSID60244165	41	5	0	0	1	0	13	0	0	0	2	0	0	0	0	0	5	1	1	0	0	0	0	0	1	0	2	0	0	0	1	0	0	0	0	0	0	0	0	0	0	0	0	0
Pentobarbital	D010424	Pentobarbital	57-33-0	DTXSID9021712	DTXSID9021712	41	8	0	0	1	0	0	1	12	0	3	1	1	0	0	0	0	0	0	0	0	0	0	0	0	1	0	0	0	0	0	0	0	0	0	0	1	0	0	1	0	0	1	0
Picrotoxin	D010852	Picrotoxin	124-87-8	DTXSID7045605	DTXSID7045605	41	24	0	0	0	0	1	0	0	0	0	2	0	0	0	0	0	0	1	5	0	0	0	0	0	0	2	0	0	0	0	0	0	1	0	0	0	0	0	0	0	0	0	0
Pimozide	D010868	Pimozide	2062-78-4	DTXSID8023474	DTXSID8023474	41	0	0	0	0	1	13	4	0	0	5	0	0	0	0	0	3	0	0	1	0	0	0	0	0	0	1	1	0	0	0	0	0	4	0	0	0	0	0	0	0	0	0	0
pramipexole	C061333	pramipexole	191217-81-9	DTXSID1044227	DTXSID1044227	41	0	1	1	0	0	1	2	0	3	1	1	0	1	0	0	1	0	0	0	0	0	1	0	6	0	0	0	0	0	0	0	0	0	0	0	0	2	0	0	0	0	0	0
Prazosin	D011224	Prazosin	19237-84-4	DTXSID50172822	DTXSID50172822	41	0	0	0	0	0	0	0	0	2	1	0	0	0	0	0	0	0	0	0	0	0	0	0	1	0	0	0	0	0	0	0	0	1	3	0	0	28	0	0	0	0	0	0
Carbon Tetrachloride	D002251	Carbon Tetrachloride	56-23-5	DTXSID8020250	DTXSID8020250	40	1	2	0	5	1	0	1	1	0	0	0	0	0	0	0	0	0	1	0	0	3	0	0	0	0	0	0	0	0	0	0	1	2	0	10	0	0	0	0	1	0	0	0
Codeine	D003061	Codeine	14168-11-7	DTXSID10161797	DTXSID10161797	40	9	2	0	0	0	0	0	2	1	0	0	1	1	0	0	1	0	0	0	0	0	1	0	1	1	0	0	0	0	0	1	0	0	0	0	0	0	0	0	1	0	0	0
Dichlorvos	D004006	Dichlorvos	62-73-7	DTXSID5020449	DTXSID5020449	40	3	5	2	1	0	2	1	0	0	3	1	2	0	0	0	0	0	3	0	0	1	0	0	0	0	0	0	0	0	0	0	4	0	0	0	2	0	0	0	0	0	0	0
Prilocaine	D011318	Prilocaine	721-50-6	DTXSID7031955	DTXSID7031955	40	8	2	2	0	0	0	0	4	0	1	0	2	0	0	3	0	1	0	0	0	0	0	0	0	0	1	0	0	0	0	1	0	0	1	0	0	0	0	0	0	0	0	0
Terbutaline	D013726	Terbutaline	23031-32-5	DTXSID3045437	DTXSID3045437	40	1	0	0	0	0	0	0	0	0	32	0	0	0	0	0	0	0	0	0	0	1	0	0	0	0	0	0	0	0	0	0	0	0	0	0	1	0	0	0	0	0	0	0
Voriconazole	D065819	Voriconazole	137234-62-9	DTXSID5046485	DTXSID5046485	40	0	2	5	1	0	0	0	0	11	0	0	1	0	0	0	0	0	0	0	0	0	0	0	0	0	0	2	0	0	0	0	0	0	0	0	0	0	0	0	0	0	0	1
Clofibrate	D002994	Clofibrate	637-07-0	DTXSID3020336	DTXSID3020336	39	0	1	1	0	28	0	0	0	0	0	0	0	0	0	0	0	0	0	0	0	0	0	0	0	0	0	0	0	0	0	0	0	0	0	0	0	0	0	0	0	0	0	2
DEET	D003671	DEET	134-62-3	DTXSID2021995	DTXSID2021995	39	9	8	0	5	1	0	0	2	2	1	0	3	0	0	0	0	1	3	0	0	0	0	0	0	0	1	0	0	0	0	0	0	1	0	0	0	0	0	0	0	0	0	0
Diclofenac	D004008	Diclofenac	15307-81-0	DTXSID30165212	DTXSID30165212	39	2	2	0	0	1	0	0	1	0	0	0	0	1	0	0	0	2	1	0	0	0	1	0	0	1	1	0	0	0	0	0	0	0	0	1	0	0	0	1	0	0	1	0
Folic Acid	D005492	Folic Acid	59-30-3	DTXSID0022519	DTXSID0022519	39	8	5	1	0	0	0	0	0	0	0	2	1	0	0	0	0	0	0	5	0	0	0	1	1	0	2	1	0	1	0	0	0	0	0	0	0	0	0	0	0	0	0	0
gemcitabine	C056507	gemcitabine	95058-81-4	DTXSID3040487	DTXSID3040487	39	1	4	2	1	3	0	0	0	0	0	0	1	0	0	2	0	0	0	0	0	0	1	0	0	0	1	0	0	0	1	0	0	0	0	1	0	0	0	0	0	0	0	0
Methaqualone	D008702	Methaqualone	72-44-6	DTXSID7023279	DTXSID7023279	39	4	2	4	0	0	0	0	6	0	1	0	0	1	0	3	0	2	0	0	0	2	0	0	0	0	0	0	0	0	0	0	2	3	0	0	0	0	0	0	0	0	0	0
Norethindrone	D009640	Norethindrone	68-22-4	DTXSID9023380	DTXSID9023380	39	1	0	0	0	0	0	0	1	1	0	0	1	0	2	1	0	0	0	0	0	0	0	0	1	0	0	0	0	0	0	1	0	0	0	0	0	0	0	0	0	0	0	0
Triamcinolone	D014221	Triamcinolone	124-94-7	DTXSID1040742	DTXSID1040742	39	0	1	0	0	12	0	0	0	0	0	0	0	0	0	2	0	0	0	0	0	1	0	0	0	0	0	0	1	1	0	0	0	0	0	0	0	0	0	0	0	0	0	1
Vinyl Chloride	D014752	Vinyl Chloride	75-01-4	DTXSID8021434	DTXSID8021434	39	0	9	1	0	2	0	0	0	0	0	0	1	0	0	1	0	0	0	0	0	0	0	0	2	0	0	2	0	0	0	0	1	0	0	0	0	0	0	0	0	0	0	0
Aluminum Hydroxide	D000536	Aluminum Hydroxide	21645-51-2	DTXSID2036405	DTXSID2036405	38	1	0	0	14	2	0	0	1	0	0	0	0	0	0	0	0	0	0	2	0	0	0	0	0	0	2	0	0	0	0	0	0	0	0	0	0	0	0	0	0	0	0	0
Amphotericin B	D000666	Amphotericin B	1397-89-3	DTXSID9022601	DTXSID9022601	38	2	0	1	6	2	0	3	0	0	1	1	0	2	0	0	0	1	0	0	0	2	1	0	0	0	0	0	0	0	1	0	0	0	0	0	0	0	0	0	0	0	0	0
Camphor	D002164	Camphor	76-22-2	DTXSID5030955	DTXSID5030955	38	19	0	0	1	0	0	0	0	0	0	0	0	1	0	0	0	0	0	3	0	0	0	6	0	0	6	0	0	0	0	0	0	0	0	1	0	0	0	0	0	0	0	0
Cinnarizine	D002936	Cinnarizine	298-57-7	DTXSID3022821	DTXSID3022821	38	2	0	0	1	0	7	18	1	0	2	0	0	0	0	0	1	0	0	0	0	0	0	0	0	0	0	0	0	0	0	0	0	1	0	0	0	0	4	0	0	0	0	0
Cobalt	D003035	Cobalt	7440-48-4	DTXSID1031040	DTXSID1031040	38	4	0	2	0	1	0	1	0	0	1	2	0	0	0	0	0	0	0	2	4	0	0	0	0	0	0	0	1	0	0	0	0	0	0	0	1	0	0	0	1	0	0	0
Diltiazem	D004110	Diltiazem	33286-22-5	DTXSID8040147	DTXSID8040147	38	1	6	0	1	2	0	4	0	1	0	0	0	1	1	0	0	3	1	1	0	0	0	0	1	0	1	0	0	0	0	0	0	0	2	0	0	2	0	0	0	0	0	0
Enflurane	D004737	Enflurane	13838-16-9	DTXSID1020562	DTXSID1020562	38	25	0	0	0	1	1	0	0	0	1	0	0	0	0	0	0	1	0	2	0	0	0	1	0	0	2	0	0	0	0	0	0	0	0	0	0	0	0	0	0	0	0	0
Oxycodone	D010098	Oxycodone	76-42-6	DTXSID5023407	DTXSID5023407	38	1	0	1	2	0	0	0	2	2	1	1	2	4	0	0	0	1	0	0	0	0	0	0	0	0	0	0	0	0	0	0	0	0	0	0	0	0	0	0	0	0	0	0
Pravastatin	D017035	Pravastatin	NOCAS_110050	DTXSID80110050	DTXSID80110050	38	0	0	2	0	14	0	0	0	0	0	1	0	0	0	1	0	0	0	0	0	0	0	0	2	0	0	0	0	0	0	0	0	0	0	0	0	1	0	0	0	0	0	0
3,4-Methylenedioxyamphetamine	D015104	3,4-Methylenedioxyamphetamine	6292-91-7	DTXSID1049017	DTXSID1049017	37	4	18	0	3	0	0	0	1	3	0	0	0	0	1	0	0	0	0	0	0	0	1	0	0	0	0	0	0	0	0	0	0	0	0	0	0	0	0	0	0	0	0	0
Betamethasone	D001623	Betamethasone	378-44-9	DTXSID3022667	DTXSID3022667	37	1	0	0	1	5	0	0	0	0	0	2	0	0	0	0	0	0	0	1	0	0	0	1	0	0	0	0	0	0	1	0	0	0	0	0	0	1	0	1	0	0	0	0
Busulfan	D002066	Busulfan	55-98-1	DTXSID3020910	DTXSID3020910	37	22	1	0	0	1	0	0	0	0	0	0	0	0	1	1	0	1	0	2	0	0	0	0	1	0	1	0	0	0	0	0	0	0	0	0	0	0	0	0	0	0	0	0
Duloxetine Hydrochloride	D000068736	Duloxetine Hydrochloride	136434-34-9	DTXSID9046443	DTXSID9046443	37	1	0	2	0	0	0	0	1	2	0	0	1	2	0	1	0	0	0	0	0	0	1	1	1	0	1	3	0	0	0	0	0	0	0	0	0	0	0	5	0	0	0	0
Flumazenil	D005442	Flumazenil	78755-81-4	DTXSID2023064	DTXSID2023064	37	23	0	0	0	0	0	0	2	0	3	0	0	1	0	0	0	0	0	0	0	0	0	3	0	0	1	0	0	0	0	0	0	0	0	0	0	0	0	0	0	0	2	0
Gold	D006046	Gold	7440-57-5	DTXSID3064697	DTXSID3064697	37	2	3	4	2	1	0	0	0	0	0	0	0	0	0	1	0	1	0	0	0	0	0	0	0	0	0	0	0	0	1	0	1	0	1	0	0	0	0	0	0	0	0	0
Hydroxyurea	D006918	Hydroxyurea	127-07-1	DTXSID6025438	DTXSID6025438	37	0	1	3	0	0	0	0	0	0	0	0	1	0	1	0	0	0	0	0	0	0	0	0	1	1	0	0	0	0	0	0	0	0	0	0	0	0	0	0	0	0	0	0
Physostigmine	D010830	Physostigmine	57-47-6	DTXSID3023471	DTXSID3023471	37	9	0	0	0	0	0	0	3	0	5	2	0	3	0	0	0	1	0	0	0	1	1	1	0	0	0	0	0	0	0	0	0	0	0	0	0	0	0	0	0	0	2	0
Sodium Salicylate	D012980	Sodium Salicylate	54-21-7	DTXSID5021708	DTXSID5021708	37	0	0	0	0	0	0	0	0	0	0	0	0	0	0	0	0	0	0	0	6	0	0	0	1	0	0	0	2	0	0	1	0	0	0	0	0	0	0	0	3	0	0	0
Tranylcypromine	D014191	Tranylcypromine	155-09-9	DTXSID2023694	DTXSID2023694	37	3	0	0	0	0	0	0	2	1	1	0	1	7	3	0	1	0	0	0	0	0	1	0	0	0	0	2	0	0	0	0	1	1	2	0	0	2	0	0	0	0	0	0
4-Butyrolactone	D015107	4-Butyrolactone	96-48-0	DTXSID6020224	DTXSID6020224	36	4	0	0	0	0	0	0	9	3	1	0	0	5	0	0	0	1	0	1	0	0	1	0	0	0	0	2	0	0	0	0	0	0	0	0	0	0	0	0	0	0	0	0
Azathioprine	D001379	Azathioprine	446-86-6	DTXSID4020119	DTXSID4020119	36	0	3	0	3	3	0	0	0	0	1	0	1	0	0	0	0	0	0	0	0	0	0	0	0	0	0	0	0	0	0	0	1	0	0	1	0	0	0	0	0	0	0	0
Imatinib Mesylate	D000068877	Imatinib Mesylate	220127-57-1	DTXSID9040502	DTXSID9040502	36	0	0	2	0	3	0	0	0	0	0	0	1	0	0	0	0	0	0	0	0	0	0	0	0	0	0	0	0	0	0	2	0	0	0	0	1	0	0	1	0	1	0	0
Malathion	D008294	Malathion	121-75-5	DTXSID4020791	DTXSID4020791	36	4	6	1	1	3	0	0	4	0	0	0	0	0	1	0	0	0	0	0	0	3	0	0	0	0	0	0	0	0	0	0	0	0	0	0	0	0	0	0	1	0	0	1
Naloxone	D009270	Naloxone	69133-14-8	DTXSID20219197	DTXSID20219197	36	11	0	0	0	0	1	0	3	1	1	1	0	0	0	0	0	0	0	0	0	0	1	0	0	5	0	0	0	0	0	0	0	0	0	0	0	0	0	0	0	0	0	0
Parathion	D010278	Parathion	56-38-2	DTXSID7021100	DTXSID7021100	36	2	3	2	1	1	0	0	1	0	2	0	0	0	1	0	0	0	3	0	0	2	0	0	0	0	0	0	0	0	0	0	2	0	0	0	2	0	0	0	0	0	0	3
Potassium Cyanide	D011190	Potassium Cyanide	151-50-8	DTXSID0024268	DTXSID0024268	36	8	0	1	5	1	1	4	4	0	2	0	1	0	0	0	3	0	0	0	0	0	0	0	0	0	0	0	0	0	0	0	0	0	0	0	0	0	0	0	0	0	0	0
Rosuvastatin Calcium	D000068718	Rosuvastatin Calcium	147098-20-2	DTXSID9045928	DTXSID9045928	36	0	0	0	0	27	0	0	0	0	0	1	0	0	0	0	0	0	0	0	0	0	0	0	0	0	0	0	0	0	0	0	0	0	0	0	0	0	0	0	0	0	0	0
Selenium	D012643	Selenium	7782-49-2	DTXSID9021261	DTXSID9021261	36	2	3	0	0	0	0	0	0	0	0	0	1	0	0	0	0	0	2	0	0	8	0	0	0	0	0	0	0	1	1	0	0	1	0	0	1	0	0	0	0	0	0	2
Tellurium	D013691	Tellurium	13494-80-9	DTXSID9032119	DTXSID9032119	36	0	2	8	2	0	0	0	0	0	0	0	1	0	0	0	0	0	0	0	0	0	0	0	0	0	0	0	0	0	0	0	0	0	0	0	0	0	0	0	0	0	0	0
Atracurium	D001279	Atracurium	64228-79-1	DTXSID9043726	DTXSID9043726	35	2	1	0	0	0	0	0	0	0	0	0	0	0	0	0	0	0	0	0	0	13	0	1	0	0	1	0	0	0	0	0	1	0	0	0	0	0	0	0	0	0	0	2
Dextromethorphan	D003915	Dextromethorphan	125-71-3	DTXSID3022908	DTXSID3022908	35	4	3	0	0	0	0	0	1	3	1	1	1	2	0	0	3	2	4	0	0	0	0	0	1	1	0	1	0	0	0	0	0	1	0	0	0	0	0	0	0	0	0	0
Diatrizoate Meglumine	D003974	Diatrizoate Meglumine	131-49-7	DTXSID20897171	DTXSID20897171	35	5	2	0	1	1	0	1	1	0	0	0	0	0	0	4	0	4	0	0	0	1	0	1	0	0	0	0	0	0	1	0	0	0	0	0	1	0	0	0	0	0	0	0
Reserpine	D012110	Reserpine	50-55-5	DTXSID7021237	DTXSID7021237	35	0	0	0	0	0	2	6	0	0	1	2	1	0	0	0	0	0	0	0	0	0	0	0	1	1	0	1	0	0	0	0	0	4	0	0	0	1	2	0	0	0	0	0
Alfentanil	D015760	Alfentanil	70879-28-6	DTXSID50221107	DTXSID50221107	34	5	0	0	0	0	0	0	0	0	0	0	0	0	0	0	2	0	0	1	0	0	0	0	0	2	0	0	0	0	0	0	0	0	0	0	0	0	0	0	0	0	0	0
Benzene	D001554	Benzene	71-43-2	DTXSID3039242	DTXSID3039242	34	2	5	0	3	0	0	0	1	0	0	1	3	0	0	0	0	0	1	0	0	0	0	0	0	0	1	0	0	0	0	0	2	0	0	0	0	0	0	0	0	0	0	0
Desipramine	D003891	Desipramine	50-47-5	DTXSID6022896	DTXSID6022896	34	4	0	1	0	0	0	0	0	1	3	1	0	3	0	0	0	1	0	0	0	0	0	0	0	1	2	0	0	0	0	0	0	0	0	0	0	7	0	3	0	0	0	0
Gold Sodium Thiomalate	D006052	Gold Sodium Thiomalate	33796-26-8	DTXSID80329685	DTXSID80329685	34	0	5	2	1	1	0	1	0	0	1	0	0	1	0	1	0	0	0	0	0	0	0	0	0	0	0	0	0	0	0	0	1	0	1	0	0	0	0	0	0	0	0	1
Propafenone	D011405	Propafenone	54063-53-5	DTXSID9045184	DTXSID9045184	34	11	0	0	1	0	0	0	1	1	0	0	0	1	0	1	0	4	1	0	0	0	0	0	0	0	1	0	0	0	0	0	0	0	4	0	0	0	0	2	0	0	1	0
terbinafine	C041359	terbinafine	78628-80-5	DTXSID90229223	DTXSID90229223	34	0	0	0	0	0	0	0	0	0	0	0	0	0	0	0	0	0	0	0	1	0	0	0	0	0	0	0	0	0	0	0	0	0	0	1	0	0	0	0	0	0	0	0
Tetrachloroethylene	D013750	Tetrachloroethylene	127-18-4	DTXSID2021319	DTXSID2021319	34	1	8	2	2	0	0	0	3	0	0	0	4	0	0	0	0	0	0	0	0	0	0	0	0	0	0	0	0	0	1	0	1	0	0	0	0	0	0	0	0	0	0	0
Thiethylperazine	D013847	Thiethylperazine	52239-63-1	DTXSID1045586	DTXSID1045586	34	1	1	0	0	1	5	2	0	0	0	0	0	0	0	0	8	0	0	0	0	0	0	0	0	0	0	0	0	0	0	0	0	6	0	0	0	0	0	0	0	0	0	1
Timolol	D013999	Timolol	91524-16-2	DTXSID70238611	DTXSID70238611	34	1	0	0	0	0	0	0	0	2	0	0	4	0	0	0	0	0	0	0	0	0	0	0	0	0	0	0	0	0	1	0	0	0	6	0	0	0	0	0	0	0	0	0
bisphenol A	C006780	bisphenol A	80-05-7	DTXSID7020182	DTXSID7020182	33	0	3	0	1	0	0	0	0	0	1	10	1	0	0	0	0	0	0	0	0	0	0	0	1	1	0	0	0	0	0	0	0	0	0	0	0	0	0	0	0	0	0	0
Carmustine	D002330	Carmustine	154-93-8	DTXSID8022743	DTXSID8022743	33	0	1	1	6	0	0	0	0	0	0	0	2	0	1	2	0	0	0	1	0	0	0	0	0	0	0	0	0	0	2	0	0	0	0	0	2	0	0	0	0	0	0	0
Chloralose	D002698	Chloralose	15879-93-3	DTXSID4020088	DTXSID4020088	33	4	0	0	0	0	0	0	10	0	0	0	0	0	0	0	0	9	0	3	0	0	0	0	0	0	1	0	0	0	0	0	0	0	0	0	0	0	0	0	0	0	0	0
Fenfluramine	D005277	Fenfluramine	37577-24-5	DTXSID60191009	DTXSID60191009	33	5	4	0	1	2	0	0	2	1	1	2	1	1	1	0	0	0	0	0	0	0	0	0	1	0	0	1	0	0	0	0	0	2	1	0	0	0	0	0	0	0	0	0
Glucose	D005947	Glucose	50-99-7	DTXSID7022910	DTXSID7022910	33	3	1	0	2	0	0	0	3	0	0	1	1	0	1	1	0	0	0	0	0	1	0	0	0	1	2	0	0	0	0	0	0	0	0	0	2	0	0	0	0	0	0	0
Leptophos	D010773	Leptophos	21609-90-5	DTXSID3040279	DTXSID3040279	33	0	15	0	0	0	0	0	0	0	0	0	0	0	0	0	0	0	11	0	0	4	0	0	0	0	0	0	0	0	0	0	0	0	0	0	0	0	0	0	0	0	0	1
Methylazoxymethanol Acetate	D008746	Methylazoxymethanol Acetate	592-62-1	DTXSID1025568	DTXSID1025568	33	2	0	0	4	0	0	0	0	0	0	2	1	0	0	0	0	0	0	0	0	0	0	0	0	0	0	0	0	0	0	0	0	0	0	0	0	0	0	0	0	0	0	0
Sirolimus	D020123	Sirolimus	53123-88-9	DTXSID5023582	DTXSID5023582	33	1	3	0	1	2	0	0	0	0	0	0	0	0	0	0	0	0	0	0	1	0	0	4	0	0	0	0	0	1	0	0	1	0	0	0	0	0	0	0	1	0	0	0
aluminum chloride	C010845	aluminum chloride	7446-70-0	DTXSID6029674	DTXSID6029674	32	0	1	0	5	0	0	0	0	0	0	10	0	0	0	0	0	0	1	0	0	0	0	0	0	0	0	0	0	0	0	0	0	0	0	0	0	0	0	0	0	0	0	1
Hydrogen Peroxide	D006861	Hydrogen Peroxide	7722-84-1	DTXSID2020715	DTXSID2020715	32	2	1	0	1	0	0	0	0	0	0	1	0	0	0	0	0	0	0	0	0	0	1	0	0	0	0	0	0	2	0	0	0	0	1	0	0	0	0	0	0	0	0	0
Loxapine	D008152	Loxapine	54810-23-0	DTXSID70203304	DTXSID70203304	32	1	0	0	0	1	11	2	0	0	0	0	0	1	0	0	2	1	0	0	0	0	0	0	1	0	1	1	0	0	0	0	0	1	0	0	0	2	0	0	0	0	0	0
sunitinib	C473478	sunitinib	557795-19-4	DTXSID1041134	DTXSID1041134	32	2	1	1	2	0	0	0	4	0	0	0	0	0	0	2	0	0	0	0	0	0	0	0	0	0	1	0	0	0	0	0	0	0	0	0	1	0	0	0	0	0	0	0
2,4-Dichlorophenoxyacetic Acid	D015084	2,4-Dichlorophenoxyacetic Acid	2307-55-3	DTXSID2058336	DTXSID2058336	31	0	6	4	1	0	0	0	1	0	0	0	1	0	0	0	0	0	2	0	0	0	0	0	0	0	0	0	0	0	0	0	0	0	0	0	0	0	0	0	0	0	0	3
Almitrine	D015765	Almitrine	27469-53-0	DTXSID4057899	DTXSID4057899	31	0	0	22	0	0	0	0	0	0	0	0	0	0	0	3	0	0	1	0	0	0	0	0	0	0	0	0	0	0	0	0	0	1	0	0	0	0	0	0	0	0	0	1
Carticaine	D002355	Carticaine	23964-58-1	DTXSID7048536	DTXSID7048536	31	1	0	1	0	0	0	0	0	0	0	0	0	0	0	17	0	0	0	0	0	0	0	0	0	0	0	0	0	0	0	0	0	0	0	0	0	0	0	0	0	0	0	0
Celecoxib	D000068579	Celecoxib	169590-42-5	DTXSID0022777	DTXSID0022777	31	1	1	0	0	0	0	0	0	1	0	0	0	1	1	0	0	0	0	0	1	0	0	0	0	0	0	0	0	12	0	0	0	0	0	0	0	0	0	0	0	0	0	0
Didanosine	D016049	Didanosine	69655-05-6	DTXSID6022927	DTXSID6022927	31	0	1	25	0	0	0	0	0	0	0	0	0	0	0	0	0	0	0	0	1	0	0	0	0	0	0	0	0	0	0	0	0	0	0	1	0	0	0	0	1	0	0	0
Dieldrin	D004026	Dieldrin	60-57-1	DTXSID9020453	DTXSID9020453	31	12	3	0	1	0	0	3	0	0	2	0	1	0	0	0	0	0	0	0	0	0	0	0	0	0	0	0	0	0	1	0	0	0	0	0	1	0	1	0	0	0	0	0
Enoxaparin	D017984	Enoxaparin	679809-58-6	DTXSID0045969	DTXSID0045969	31	0	1	0	0	4	0	0	0	0	0	0	0	0	7	0	0	0	0	0	0	1	0	0	0	0	0	0	0	1	0	0	0	0	0	0	0	0	0	0	0	8	0	0
Maneb	D008344	Maneb	12427-38-2	DTXSID9020794	DTXSID9020794	31	2	1	0	1	0	0	10	1	0	0	0	1	0	0	0	0	0	0	0	0	0	0	0	0	0	1	0	0	0	0	0	0	1	0	0	0	0	6	0	0	0	0	0
Sufentanil	D017409	Sufentanil	60561-17-3	DTXSID5048928	DTXSID5048928	31	5	0	0	0	2	0	0	1	0	0	0	0	1	0	0	0	2	0	0	0	0	0	0	1	2	0	0	0	0	0	0	0	0	0	0	0	0	0	0	0	0	0	0
3,3'-iminodipropionitrile	C008110	3,3'-iminodipropionitrile	16688-98-5	DTXSID50333956	DTXSID50333956	30	1	7	2	0	0	0	0	0	0	0	2	1	0	0	0	0	0	0	0	1	0	0	0	0	0	0	0	1	0	0	0	0	1	0	0	0	0	0	0	0	0	0	0
Acetaldehyde	D000079	Acetaldehyde	75-07-0	DTXSID5039224	DTXSID5039224	30	11	2	0	1	2	0	0	1	0	2	1	0	0	0	0	0	0	2	0	0	0	0	1	0	0	0	0	0	0	2	0	0	1	0	0	0	0	0	0	0	0	0	2
Danazol	D003613	Danazol	17230-88-5	DTXSID2022880	DTXSID2022880	30	0	0	0	1	1	0	0	0	0	0	0	0	0	0	0	0	0	0	0	1	0	0	0	0	0	0	1	0	0	0	1	0	0	0	0	0	0	0	0	0	0	0	0
Dimethyl Sulfoxide	D004121	Dimethyl Sulfoxide	67-68-5	DTXSID2021735	DTXSID2021735	30	1	0	3	2	0	0	0	0	0	0	0	0	0	0	2	0	0	0	0	0	1	1	0	0	0	0	0	0	2	0	0	0	0	0	0	1	0	0	0	0	1	0	0
Flecainide	D005424	Flecainide	54143-56-5	DTXSID8020626	DTXSID8020626	30	2	0	3	0	0	0	0	0	2	0	0	0	1	0	0	1	3	0	0	0	1	2	0	0	0	0	0	0	0	0	0	0	0	4	0	0	0	0	0	0	0	0	1
Hyaluronic Acid	D006820	Hyaluronic Acid	9067-32-7	DTXSID30238233	DTXSID30238233	30	0	1	0	0	0	0	0	0	0	0	0	0	0	1	0	0	0	0	0	0	0	0	0	0	0	0	0	0	0	14	0	0	0	0	0	0	0	0	0	0	0	0	0
Hydrochlorothiazide	D006852	Hydrochlorothiazide	58-93-5	DTXSID2020713	DTXSID2020713	30	1	1	0	1	2	0	0	1	0	0	0	0	0	0	1	0	0	1	0	0	1	1	0	1	0	3	0	0	0	0	0	0	0	0	0	0	4	0	4	0	0	0	0
Promethazine	D011398	Promethazine	58-33-3	DTXSID3021192	DTXSID3021192	30	3	0	0	0	1	2	0	1	5	1	0	1	5	0	0	3	1	1	1	0	0	0	0	0	0	0	0	0	0	0	0	0	0	0	0	0	0	0	0	0	0	0	0
Tadalafil	D000068581	Tadalafil	171596-29-5	DTXSID9046786	DTXSID9046786	30	0	0	0	0	1	0	0	0	0	0	0	0	0	2	0	0	0	0	0	1	0	0	0	0	0	0	0	1	3	1	1	0	0	0	0	0	0	0	0	0	0	0	0
apixaban	C522181	apixaban	503612-47-3	DTXSID80436500	DTXSID80436500	29	0	0	0	0	0	0	0	0	0	0	0	0	0	10	0	0	0	0	0	0	0	0	0	0	0	0	0	0	4	0	0	0	0	0	0	0	0	0	0	0	6	0	0
Carbon Dioxide	D002245	Carbon Dioxide	124-38-9	DTXSID4027028	DTXSID4027028	29	3	3	0	0	0	1	0	5	0	0	0	0	0	1	0	0	0	1	1	0	1	1	0	0	0	0	0	0	0	0	0	0	0	0	0	0	0	0	0	0	0	1	0
Domperidone	D004294	Domperidone	57808-66-9	DTXSID1045116	DTXSID1045116	29	0	0	0	0	0	11	1	0	0	0	0	0	0	0	0	7	0	0	0	0	0	0	0	0	0	1	0	0	0	0	0	0	0	0	0	0	0	0	0	0	0	0	0
Doxepin	D004316	Doxepin	1229-29-4	DTXSID8045145	DTXSID8045145	29	3	0	0	2	0	1	0	3	3	0	0	0	2	0	0	1	2	0	0	0	0	0	1	0	0	0	0	0	0	0	0	0	0	1	0	0	2	0	0	0	0	0	0
fludarabine	C024352	fludarabine	21679-14-1	DTXSID4039657	DTXSID4039657	29	0	3	1	2	0	0	0	0	0	0	0	0	0	1	0	0	0	0	0	0	1	0	0	1	0	0	0	0	0	1	0	0	0	0	0	2	0	0	0	1	0	0	0
Metoprolol	D008790	Metoprolol	56392-17-7	DTXSID9037248	DTXSID9037248	29	0	1	0	0	0	0	0	0	2	1	0	2	5	0	0	0	0	0	0	1	0	0	0	4	0	0	1	0	1	1	0	0	0	0	1	0	1	0	0	0	0	0	0
Oxazepam	D010076	Oxazepam	604-75-1	DTXSID1021087	DTXSID1021087	29	1	1	0	0	0	0	0	3	2	0	2	0	1	0	1	0	1	2	0	0	1	2	1	0	0	4	0	0	0	0	0	0	1	0	0	0	0	0	0	0	0	0	0
Ozone	D010126	Ozone	10028-15-6	DTXSID0021098	DTXSID0021098	29	2	1	0	2	0	0	0	0	0	0	2	0	0	0	0	0	0	0	1	0	0	0	0	5	0	0	1	0	5	0	0	0	0	0	0	0	0	0	0	0	0	0	0
Allopurinol	D000493	Allopurinol	315-30-0	DTXSID4022573	DTXSID4022573	28	1	0	5	0	3	1	0	0	1	0	0	0	0	0	2	0	0	0	0	0	0	0	1	0	0	0	0	0	0	0	0	0	0	0	1	0	0	0	0	0	0	0	0
cabergoline	C047047	cabergoline	81409-90-7	DTXSID6022719	DTXSID6022719	28	0	1	0	0	0	0	0	0	2	0	0	0	0	0	0	0	0	0	0	0	0	0	0	0	0	0	1	0	1	0	0	0	0	0	0	0	0	0	0	0	0	0	0
Chromium	D002857	Chromium	7440-47-3	DTXSID3031022	DTXSID3031022	28	0	1	3	1	1	0	0	0	0	0	2	0	0	0	0	0	0	0	0	1	0	0	0	0	0	0	0	0	0	0	0	0	0	0	0	0	0	0	0	0	0	0	0
Glycerol	D005990	Glycerol	56-81-5	DTXSID9020663	DTXSID9020663	28	3	5	0	0	2	1	0	0	0	0	0	0	0	0	0	0	0	0	0	0	1	0	0	0	0	0	0	0	0	0	0	0	0	0	0	2	0	0	0	1	0	0	0
Meglumine	D008536	Meglumine	6284-40-8	DTXSID0023244	DTXSID0023244	28	3	1	0	2	0	0	0	0	0	0	0	1	0	0	1	0	0	0	0	0	0	1	0	0	0	2	0	0	0	1	0	0	0	1	0	0	0	0	0	0	0	0	0
Metformin	D008687	Metformin	1115-70-4	DTXSID9037246	DTXSID9037246	28	0	0	0	6	1	0	0	3	0	0	0	0	0	0	0	1	0	0	0	0	0	0	0	0	0	0	0	0	7	1	1	0	0	0	0	0	0	1	0	0	0	0	0
Methylene Blue	D008751	Methylene Blue	61-73-4	DTXSID0023296	DTXSID0023296	28	2	2	0	2	0	0	0	1	0	0	0	2	1	0	0	1	1	0	0	0	0	5	0	0	0	0	0	0	0	0	0	0	0	0	0	0	0	0	0	0	0	0	0
monomethylpropion	C047806	monomethylpropion	5650-44-2	DTXSID30863589	DTXSID30863589	28	1	0	0	3	0	2	6	2	0	0	0	0	0	0	0	0	0	0	0	0	0	0	0	0	0	0	0	0	0	0	0	0	0	0	0	0	0	8	0	0	0	0	0
Pemoline	D010389	Pemoline	2152-34-3	DTXSID3023427	DTXSID3023427	28	1	1	0	0	0	0	0	1	1	0	0	0	0	0	0	0	0	1	0	0	0	0	0	0	0	0	2	0	0	0	0	0	3	0	2	0	0	0	0	0	0	0	0
Penicillin G Benzathine	D010401	Penicillin G Benzathine	1538-09-6	DTXSID2047804	DTXSID2047804	28	1	0	0	1	1	0	0	0	0	0	0	1	0	0	0	0	0	0	0	0	1	0	0	0	0	0	0	2	0	0	0	0	0	0	0	1	0	0	0	0	0	0	0
Primidone	D011324	Primidone	125-33-7	DTXSID7023510	DTXSID7023510	28	4	1	0	2	0	0	0	1	0	1	0	0	0	0	0	0	0	5	1	0	0	0	0	0	0	0	0	0	0	0	0	0	0	0	0	0	0	0	0	0	0	0	0
Pyridostigmine Bromide	D011729	Pyridostigmine Bromide	155-97-5	DTXSID20165786	DTXSID20165786	28	1	6	0	1	3	0	1	0	0	2	1	1	0	0	0	0	0	2	0	0	0	0	0	0	1	0	0	0	0	0	0	0	0	0	0	0	0	0	0	0	0	0	1
Sodium Hypochlorite	D012973	Sodium Hypochlorite	7681-52-9	DTXSID8021276	DTXSID8021276	28	0	0	0	1	0	0	0	0	0	0	0	0	0	0	5	0	0	0	0	0	0	0	0	0	0	0	1	0	0	1	0	0	0	0	0	0	0	0	0	0	0	0	0
Varenicline	D000068580	Varenicline	249296-44-4	DTXSID70891447	DTXSID70891447	28	3	2	0	0	0	0	0	0	1	0	1	0	0	0	1	1	0	0	1	0	0	0	0	6	0	1	3	0	2	0	0	0	0	0	0	0	1	1	0	0	0	0	0
vinorelbine	C030852	vinorelbine	71486-22-1	DTXSID8040640	DTXSID8040640	28	0	6	7	0	0	0	0	0	0	0	0	1	0	0	5	0	0	0	0	0	0	0	0	0	0	0	0	0	1	0	0	0	0	0	0	0	0	0	4	0	0	0	0
Azithromycin	D017963	Azithromycin	83905-01-5	DTXSID8030760	DTXSID8030760	27	0	0	0	0	1	0	0	0	0	0	0	0	3	0	0	0	0	0	0	3	1	0	0	0	0	0	0	1	0	0	5	0	0	0	0	0	0	0	1	1	0	0	0
Barium	D001464	Barium	7440-39-3	DTXSID8023894	DTXSID8023894	27	3	0	0	0	1	0	0	0	0	0	0	0	0	0	0	0	0	0	0	1	8	0	0	0	0	0	0	0	0	0	0	0	0	0	0	0	0	0	0	0	0	0	0
Biperiden	D001712	Biperiden	1235-82-1	DTXSID2047856	DTXSID2047856	27	1	0	0	0	0	5	1	0	2	0	1	0	4	0	0	1	0	0	0	0	0	0	0	0	0	0	0	0	0	0	0	0	0	0	0	0	0	1	0	0	0	0	0
Dihydroergotamine	D004087	Dihydroergotamine	511-12-6	DTXSID6045614	DTXSID6045614	27	1	1	0	0	0	0	0	0	0	0	0	0	0	0	0	0	0	0	0	0	0	0	0	0	0	0	0	0	1	0	0	0	0	0	0	1	0	0	0	0	0	0	0
Doxycycline	D004318	Doxycycline	24390-14-5	DTXSID4041020	DTXSID4041020	27	0	0	0	0	0	0	0	0	0	1	0	1	0	0	0	0	0	0	0	0	1	0	0	0	0	0	1	0	0	0	0	1	0	0	0	0	0	0	0	0	0	2	0
Germanium	D005857	Germanium	7440-56-4	DTXSID8052483	DTXSID8052483	27	2	4	5	1	3	0	0	0	0	0	0	1	0	1	0	0	0	2	0	1	0	0	0	0	0	0	0	0	0	0	0	0	0	0	0	0	0	0	0	0	0	0	0
Glutethimide	D005984	Glutethimide	77-21-4	DTXSID1023102	DTXSID1023102	27	4	1	1	0	0	0	0	11	1	0	0	0	0	0	0	0	1	0	0	0	0	0	0	0	0	0	0	0	0	0	0	0	0	0	0	1	0	0	0	0	0	0	0
Lithium Chloride	D018021	Lithium Chloride	7447-41-8	DTXSID2025509	DTXSID2025509	27	7	0	0	2	0	0	0	0	0	2	1	1	0	0	0	0	0	0	1	0	0	0	4	0	1	0	0	0	0	0	0	0	0	0	0	0	0	0	0	0	0	0	0
Methohexital	D008723	Methohexital	151-83-7	DTXSID1023287	DTXSID1023287	27	8	0	0	0	0	0	0	1	0	1	1	0	0	0	0	1	3	0	4	0	0	0	0	0	0	3	0	0	0	0	0	0	0	1	0	0	0	0	0	0	0	0	0
Permethrin	D026023	Permethrin	61949-76-6	DTXSID0038338	DTXSID0038338	27	7	2	2	0	0	0	1	0	0	3	0	1	0	0	2	1	0	2	0	0	0	0	0	0	0	0	0	0	0	0	0	0	0	0	0	0	0	0	0	0	0	0	2
Salicylic Acid	D020156	Salicylic Acid	69-72-7	DTXSID7026368	DTXSID7026368	27	1	1	0	0	0	0	0	0	0	0	0	0	1	1	0	0	0	0	0	0	0	2	0	0	0	0	0	1	0	0	1	0	0	0	0	1	0	0	0	1	0	0	0
Sorbitol	D013012	Sorbitol	50-70-4	DTXSID5023588	DTXSID5023588	27	1	1	0	1	1	0	0	3	0	0	0	0	0	0	1	0	2	0	0	0	0	0	0	0	0	0	0	0	0	0	0	0	0	0	1	1	0	0	0	0	0	0	0
Sulfamethoxazole	D013420	Sulfamethoxazole	723-46-6	DTXSID8026064	DTXSID8026064	27	1	0	0	0	0	0	0	0	1	2	0	0	1	0	0	0	0	2	0	0	0	0	0	0	0	0	0	0	0	0	0	0	0	0	1	0	0	0	0	0	0	0	0
zopiclone	C515050	zopiclone	43200-80-2	DTXSID4041155	DTXSID4041155	27	4	0	0	0	0	0	0	3	0	0	0	0	2	0	0	0	0	0	0	0	0	1	0	0	0	0	6	0	0	0	0	0	0	0	0	0	0	0	0	0	0	1	0
Atenolol	D001262	Atenolol	29122-68-7	DTXSID2022628	DTXSID2022628	26	0	0	0	0	0	0	0	0	2	1	1	2	1	0	0	0	0	0	1	0	0	0	0	4	0	0	1	0	0	0	0	0	0	3	0	0	1	0	0	0	0	1	0
Atomoxetine Hydrochloride	D000069445	Atomoxetine Hydrochloride	82248-59-7	DTXSID2044266	DTXSID2044266	26	8	0	0	0	0	0	0	0	1	0	0	0	0	0	0	1	0	0	0	0	0	0	0	0	0	0	1	0	2	0	0	0	0	0	0	0	1	0	1	0	0	0	0
Bicuculline	D001640	Bicuculline	485-49-4	DTXSID3042687	DTXSID3042687	26	15	0	0	0	0	0	0	0	0	0	0	0	0	0	0	0	0	0	2	0	0	0	2	0	0	0	0	0	0	0	0	0	0	0	0	0	0	0	0	0	0	0	0
Chlorambucil	D002699	Chlorambucil	305-03-3	DTXSID7020263	DTXSID7020263	26	10	1	1	0	0	0	0	0	1	0	0	1	0	0	0	0	4	0	0	0	0	0	0	0	0	0	0	0	0	0	0	0	0	0	0	0	0	0	1	0	0	0	0
Cilastatin	D015377	Cilastatin	82009-34-5	DTXSID8048238	DTXSID8048238	26	14	0	0	1	0	0	0	0	0	2	0	3	0	0	0	0	1	0	1	0	0	1	0	0	0	0	0	0	0	0	0	0	0	0	0	0	0	0	0	0	0	0	0
Dipyridamole	D004176	Dipyridamole	58-32-2	DTXSID6040668	DTXSID6040668	26	0	1	0	0	1	0	0	1	1	0	0	0	0	2	0	0	0	0	0	0	0	0	0	0	0	0	0	0	1	0	0	0	0	5	0	0	0	0	0	0	1	0	0
Gemfibrozil	D015248	Gemfibrozil	25812-30-0	DTXSID0020652	DTXSID0020652	26	0	0	0	0	14	0	0	0	0	0	0	0	0	0	0	0	0	0	0	0	0	0	0	0	0	0	0	0	0	0	0	0	0	0	0	0	0	0	0	0	0	0	0
Memantine	D008559	Memantine	19982-08-2	DTXSID5045174	DTXSID5045174	26	3	0	0	1	0	0	1	0	5	0	1	0	2	0	0	1	3	0	0	0	0	1	0	1	0	0	0	0	0	0	0	0	0	2	0	0	0	0	1	0	0	0	0
Paraoxon	D010261	Paraoxon	311-45-5	DTXSID6024046	DTXSID6024046	26	5	0	3	1	5	0	0	0	0	2	0	1	0	0	0	0	0	1	1	0	1	0	4	0	0	0	0	0	0	0	0	0	0	0	0	0	0	0	0	0	0	0	0
Ampicillin	D000667	Ampicillin	69-53-4	DTXSID4022602	DTXSID4022602	25	5	1	0	0	1	0	0	0	0	0	0	1	0	0	0	0	1	0	1	0	0	0	0	0	0	0	0	3	0	0	1	0	0	0	0	0	0	0	0	4	0	0	0
Apomorphine	D001058	Apomorphine	41372-20-7	DTXSID0048185	DTXSID0048185	25	0	0	0	0	0	0	3	0	4	1	0	0	0	0	0	1	0	0	0	0	0	0	0	1	0	0	0	0	0	0	0	0	2	0	0	0	3	2	0	0	0	0	0
Cyclopentolate	D003519	Cyclopentolate	512-15-2	DTXSID3048528	DTXSID3048528	25	1	1	0	0	0	0	0	0	4	0	0	1	1	0	0	0	0	0	1	0	0	3	0	0	0	3	0	0	0	0	0	0	0	0	0	0	0	0	0	0	0	0	0
Flupenthixol	D005475	Flupenthixol	2709-56-0	DTXSID3058749	DTXSID3058749	25	1	1	0	1	0	7	2	1	0	1	0	0	0	0	0	3	0	0	0	0	0	0	0	0	0	1	1	0	0	0	0	0	0	0	0	0	0	0	0	0	0	0	0
fluphenazine depot	C011825	fluphenazine depot	5002-47-1	DTXSID7023069	DTXSID7023069	25	0	1	0	1	0	6	2	0	0	1	0	0	0	0	0	4	0	0	0	0	0	0	0	0	0	0	0	0	0	0	0	0	2	0	0	0	0	0	0	0	0	0	0
ixabepilone	C430592	ixabepilone	219989-84-1	DTXSID70870252	DTXSID70870252	25	0	1	20	0	0	0	0	0	0	0	0	0	0	0	0	0	0	1	0	0	0	0	0	0	0	0	0	0	0	0	0	1	0	0	0	0	0	0	0	0	0	0	0
Naproxen	D009288	Naproxen	26159-34-2	DTXSID7045576	DTXSID7045576	25	2	1	2	0	0	0	1	0	0	0	0	3	0	0	0	0	0	1	0	1	0	0	0	0	0	0	0	0	1	0	2	0	0	0	1	0	0	0	0	0	0	0	0
Phenylbutazone	D010653	Phenylbutazone	50-33-9	DTXSID9021136	DTXSID9021136	25	3	3	0	0	0	0	0	1	0	0	0	0	0	2	0	0	0	0	0	0	2	0	0	0	0	0	0	0	0	0	0	0	1	1	0	1	0	0	0	0	0	0	0
Procainamide	D011342	Procainamide	51-06-9	DTXSID7023512	DTXSID7023512	25	0	1	2	0	5	0	0	0	1	1	0	0	1	0	0	0	0	0	0	0	0	0	0	0	0	0	1	0	0	0	0	0	0	0	0	0	0	0	0	0	0	0	2
1-hexylcarbamoyl-5-fluorouracil	C017367	1-hexylcarbamoyl-5-fluorouracil	61422-45-5	DTXSID2045941	DTXSID2045941	24	0	2	0	6	0	0	0	0	0	0	0	1	0	0	1	0	0	0	0	0	0	0	0	0	0	0	0	0	1	0	0	0	0	0	0	1	0	0	0	0	0	0	0
Cyclizine	D003501	Cyclizine	82-92-8	DTXSID4022864	DTXSID4022864	24	2	0	0	0	1	0	0	0	1	1	0	0	0	0	0	5	0	1	0	0	2	0	0	1	0	0	0	0	0	0	0	0	0	0	0	1	0	0	0	0	0	0	0
decamethrin	C017180	decamethrin	52820-00-5	DTXSID8041822	DTXSID8041822	24	2	2	2	0	0	0	0	0	0	5	3	0	0	0	2	0	0	1	0	0	0	0	0	0	0	0	0	0	0	0	0	0	0	0	0	0	0	0	0	0	0	0	1
Dopamine	D004298	Dopamine	51-61-6	DTXSID6022420	DTXSID6022420	24	0	1	0	1	0	1	4	0	0	0	1	0	1	0	0	0	1	0	0	0	0	1	0	0	0	0	0	0	0	0	0	0	0	0	0	2	0	1	0	0	0	0	0
Fingolimod Hydrochloride	D000068876	Fingolimod Hydrochloride	162359-56-0	DTXSID00167364	DTXSID00167364	24	0	0	0	1	0	0	0	0	0	0	1	0	0	1	0	0	0	0	0	0	0	0	0	0	0	0	0	0	0	1	0	0	0	0	0	0	0	0	0	0	0	0	0
Hydromorphone	D004091	Hydromorphone	466-99-9	DTXSID8023133	DTXSID8023133	24	2	0	0	1	0	0	0	1	0	1	0	0	1	0	0	0	5	0	0	0	0	0	1	1	3	1	0	1	0	0	0	0	0	0	0	0	0	0	0	0	0	0	0
Medroxyprogesterone Acetate	D017258	Medroxyprogesterone Acetate	71-58-9	DTXSID0025527	DTXSID0025527	24	0	0	0	0	0	0	0	0	0	0	1	0	0	0	0	0	0	0	0	0	0	0	0	0	0	0	0	0	5	0	0	0	0	0	0	0	0	0	0	0	0	0	0
methylazoxymethanol	C030667	methylazoxymethanol	590-96-5	DTXSID1035076	DTXSID1035076	24	2	0	0	4	0	0	0	0	0	0	2	1	0	0	0	0	0	0	0	0	0	0	0	0	0	0	0	0	0	0	0	0	0	0	0	0	0	0	0	0	0	0	0
Niacin	D009525	Niacin	7069-06-9	DTXSID40220962	DTXSID40220962	24	0	0	1	0	8	0	0	0	0	0	0	0	1	0	0	0	0	0	0	0	0	0	0	0	0	0	0	0	0	0	0	0	0	1	5	0	0	0	0	0	0	0	0
Silver	D012834	Silver	7440-22-4	DTXSID4024305	DTXSID4024305	24	0	1	2	1	0	0	0	1	0	0	1	1	0	0	2	0	0	0	0	1	1	0	1	0	0	0	0	0	0	1	0	0	0	0	0	2	0	0	0	0	0	0	0
Sodium Hydroxide	D012972	Sodium Hydroxide	1310-73-2	DTXSID0029634	DTXSID0029634	24	0	0	0	0	0	0	0	0	0	0	0	0	0	0	0	0	0	0	0	0	0	0	0	0	1	0	0	0	0	1	0	0	0	0	0	0	0	0	0	0	0	0	0
zonisamide	C022189	zonisamide	68291-97-4	DTXSID9046023	DTXSID9046023	24	1	0	0	0	0	0	0	0	0	1	1	1	0	0	3	0	0	1	0	0	0	1	0	2	0	0	0	0	0	0	0	0	0	0	0	0	0	0	0	0	1	0	0
Acenocoumarol	D000074	Acenocoumarol	152-72-7	DTXSID2022541	DTXSID2022541	23	0	0	0	1	1	0	0	0	0	0	0	0	0	6	0	0	0	0	0	0	0	0	0	0	0	0	0	0	1	0	0	0	0	0	0	0	0	0	0	0	2	0	0
Carrageenan	D002351	Carrageenan	9000-07-1	DTXSID3020255	DTXSID3020255	23	0	0	0	0	0	0	0	0	0	0	0	0	0	0	0	0	0	0	0	0	1	0	0	0	20	0	0	0	0	0	0	0	0	0	0	0	0	0	0	0	0	0	0
Dichloroacetic Acid	D003999	Dichloroacetic Acid	79-43-6	DTXSID2020428	DTXSID2020428	23	0	0	9	0	0	0	0	0	0	0	0	1	0	0	0	0	0	0	0	0	0	0	0	0	0	0	0	0	0	0	0	2	0	0	0	0	0	0	0	0	0	0	0
Ergonovine	D004874	Ergonovine	60-79-7	DTXSID8046323	DTXSID8046323	23	5	0	0	0	0	0	0	0	1	0	0	0	0	0	0	0	0	0	0	0	0	0	0	0	0	0	0	0	0	0	0	0	0	0	0	0	0	0	0	0	0	0	0
Isosorbide Dinitrate	D007548	Isosorbide Dinitrate	87-33-2	DTXSID0045832	DTXSID0045832	23	0	0	0	0	0	0	0	0	1	0	0	0	0	0	0	0	0	0	0	0	1	0	0	0	1	0	0	0	0	0	0	0	0	4	0	0	3	0	0	0	0	0	0
leflunomide	C045463	leflunomide	75706-12-6	DTXSID9023201	DTXSID9023201	23	0	0	10	0	0	0	0	0	0	0	0	0	0	0	0	0	0	0	0	0	0	0	0	0	0	0	0	0	0	1	0	0	0	0	0	0	0	0	0	0	0	0	0
Mannitol	D008353	Mannitol	643-01-6	DTXSID40214523	DTXSID40214523	23	2	0	0	3	0	0	0	0	0	0	0	1	0	1	1	0	0	0	0	0	0	1	0	0	0	0	0	0	0	1	0	0	0	0	0	4	0	0	0	0	0	0	0
meropenem	C059500	meropenem	96036-03-2	DTXSID7045526	DTXSID7045526	23	17	0	0	0	0	0	0	0	0	0	0	0	0	0	0	0	1	0	5	0	0	0	0	0	0	0	0	0	0	0	0	0	0	0	0	0	0	0	0	0	0	0	0
Oseltamivir	D053139	Oseltamivir	196618-13-0	DTXSID9044291	DTXSID9044291	23	1	7	0	0	0	0	0	0	4	0	1	2	5	0	0	0	0	0	0	0	0	1	0	0	0	0	1	0	0	0	0	0	0	0	0	0	0	0	0	0	0	0	0
sodium phosphate	C018279	sodium phosphate	7601-54-9	DTXSID2035223	DTXSID2035223	23	4	0	0	0	1	0	0	4	0	0	0	0	0	0	1	0	0	0	0	0	0	0	0	0	0	0	1	0	0	0	0	0	0	0	0	0	0	0	0	0	0	0	0
Suramin	D013498	Suramin	145-63-1	DTXSID1046344	DTXSID1046344	23	0	5	4	0	0	0	0	0	0	0	0	0	0	0	4	0	0	0	0	0	0	0	0	0	0	0	0	0	0	0	0	0	0	0	1	0	0	0	0	0	0	0	0
taxane	C080625	taxane	(blank)	DTXSID70936327	DTXSID70936327	23	0	2	13	0	0	0	0	0	0	0	0	0	0	0	0	0	0	0	0	0	0	0	0	0	0	0	0	0	0	0	0	0	0	0	0	0	0	0	0	0	0	0	0
Tegafur	D005641	Tegafur	37076-68-9	DTXSID8021305	DTXSID8021305	23	0	1	1	4	0	0	0	0	0	0	0	0	0	0	1	0	0	0	0	0	0	0	0	0	0	0	0	0	1	0	0	0	0	0	0	1	1	0	0	0	0	0	0
Amoxicillin	D000658	Amoxicillin	26889-93-0	DTXSID30181396	DTXSID30181396	22	1	0	0	0	0	0	0	1	4	0	0	0	0	0	1	0	0	0	1	0	0	0	0	0	0	0	0	0	0	0	0	0	0	0	0	0	0	0	0	0	0	0	0
Benztropine	D001590	Benztropine	6148-20-5	DTXSID90360822	DTXSID90360822	22	0	0	0	0	0	2	3	1	0	0	0	1	7	0	0	2	0	0	0	0	0	0	0	1	0	0	0	0	0	0	0	0	3	0	0	0	0	0	0	0	0	0	0
Buspirone	D002065	Buspirone	33386-08-2	DTXSID1037193	DTXSID1037193	22	3	0	0	0	0	0	1	0	0	0	0	0	2	0	0	6	3	0	0	0	0	0	0	2	0	1	2	0	0	0	0	0	0	0	0	0	0	0	0	0	0	0	0
chloroprocaine	C004616	chloroprocaine	133-16-4	DTXSID8022799	DTXSID8022799	22	1	6	3	0	0	0	0	0	0	0	0	0	0	0	0	0	0	0	0	0	6	0	0	0	0	1	0	0	0	0	0	0	0	0	0	0	0	0	0	0	0	0	0
Dimethoate	D004117	Dimethoate	60-51-5	DTXSID7020479	DTXSID7020479	22	0	3	1	1	0	2	0	0	0	0	0	0	0	1	0	0	0	0	0	0	0	0	0	0	0	0	0	0	0	0	0	0	0	0	0	1	0	1	0	0	0	0	1
Glyburide	D005905	Glyburide	10238-21-8	DTXSID0037237	DTXSID0037237	22	3	0	0	1	0	0	0	5	0	1	0	0	0	0	0	0	1	0	0	0	0	0	0	0	0	0	0	0	0	0	0	0	0	0	0	0	0	0	0	0	0	0	0
Itraconazole	D017964	Itraconazole	84625-61-6	DTXSID3023180	DTXSID3023180	22	1	1	2	0	0	1	0	0	1	1	0	0	1	0	1	0	0	0	0	0	1	0	0	0	0	0	0	0	0	1	0	0	0	4	0	0	0	0	2	0	0	0	0
Melarsoprol	D008549	Melarsoprol	(blank)	DTXSID90862033	DTXSID90862033	22	1	0	1	10	0	0	0	1	0	0	0	1	0	1	2	0	0	0	0	0	0	0	0	0	0	0	0	0	0	0	0	0	0	0	0	0	0	0	0	0	0	0	0
Methimazole	D008713	Methimazole	60-56-0	DTXSID4020820	DTXSID4020820	22	0	0	0	0	1	0	0	0	0	0	0	0	0	0	0	0	0	0	1	1	0	0	0	0	0	0	0	0	0	0	0	0	1	0	0	0	0	0	0	0	0	0	0
Moclobemide	D020912	Moclobemide	71320-77-9	DTXSID9040554	DTXSID9040554	22	0	1	0	0	1	0	0	1	1	2	0	3	0	0	0	0	2	0	0	0	0	1	0	0	0	1	2	0	0	0	0	0	0	0	0	0	2	0	0	0	0	0	0
modafinil	C048833	modafinil	68693-11-8	DTXSID0023329	DTXSID0023329	22	0	0	0	0	0	0	0	0	3	0	0	0	0	0	0	0	0	0	1	0	0	0	0	3	1	0	6	0	0	0	0	0	0	0	0	0	0	0	0	0	0	1	0
Nitrazepam	D009567	Nitrazepam	146-22-5	DTXSID5023372	DTXSID5023372	22	0	0	0	0	1	0	0	6	1	0	1	0	1	0	0	0	1	1	0	0	0	0	0	2	0	0	0	0	0	0	0	0	0	0	0	1	0	0	0	0	0	0	0
perhexiline maleate	C023470	perhexiline maleate	6724-53-4	DTXSID1021114	DTXSID1021114	22	0	1	8	1	2	0	1	0	0	0	0	0	0	0	2	0	0	0	0	0	1	0	0	0	0	0	0	0	0	0	0	1	0	0	0	0	0	0	0	0	0	0	1
Pyrimethamine	D011739	Pyrimethamine	58-14-0	DTXSID9021217	DTXSID9021217	22	6	0	0	0	1	1	0	0	0	0	0	1	0	0	0	0	0	1	0	0	0	0	0	0	0	1	0	0	0	2	0	0	1	0	0	0	0	0	0	1	0	0	0
Ritonavir	D019438	Ritonavir	155213-67-5	DTXSID1048627	DTXSID1048627	22	0	1	0	0	0	1	0	1	0	0	0	1	0	0	0	0	0	1	0	0	0	0	0	0	0	0	0	0	1	0	0	1	0	1	0	0	0	1	0	0	3	0	0
Sodium	D012964	Sodium	7440-23-5	DTXSID1049774	DTXSID1049774	22	2	0	0	3	1	0	0	0	0	0	0	0	0	4	0	0	0	0	0	0	1	1	0	0	0	0	0	0	0	0	0	0	0	0	0	0	0	0	0	0	0	0	0
Vindesine	D014751	Vindesine	53643-48-4	DTXSID6023739	DTXSID6023739	22	0	7	8	0	0	0	0	0	0	0	0	0	0	0	3	0	0	0	0	0	1	0	0	0	0	0	0	0	0	0	0	0	0	0	0	0	0	0	0	0	0	0	1
3,4-methylenedioxypyrovalerone	C554666	3,4-methylenedioxypyrovalerone	687603-66-3	DTXSID90897461	DTXSID90897461	21	0	0	0	0	0	0	0	0	6	0	0	0	6	0	0	0	0	0	0	0	0	1	0	0	0	0	0	0	1	0	0	0	0	0	0	0	0	0	0	0	1	0	0
Adenosine	D000241	Adenosine	58-61-7	DTXSID1022558	DTXSID1022558	21	1	0	0	0	0	1	0	0	0	0	0	0	0	0	0	0	0	0	0	0	0	0	0	0	3	0	0	0	3	0	0	0	0	6	0	0	0	0	0	0	1	0	0
buflomedil	C010651	buflomedil	55837-25-7	DTXSID5022697	DTXSID5022697	21	6	1	0	1	0	0	0	2	0	0	0	0	0	0	0	0	6	1	0	0	0	0	1	0	0	1	0	0	0	0	0	0	0	0	0	0	0	0	0	0	0	0	0
Camptothecin	D002166	Camptothecin	7689-03-4	DTXSID0030956	DTXSID0030956	21	1	0	3	0	0	0	0	0	0	0	0	0	0	0	0	0	0	1	0	0	0	0	0	0	0	0	0	0	0	0	0	0	0	0	0	0	0	0	0	0	0	0	0
cerivastatin	C086276	cerivastatin	145599-86-6	DTXSID9022786	DTXSID9022786	21	0	0	0	0	15	0	0	0	0	0	0	0	0	0	0	0	0	0	0	0	0	0	0	0	0	0	0	0	0	0	0	0	0	0	0	0	0	0	0	0	0	0	0
Chlorhexidine	D002710	Chlorhexidine	3697-42-5	DTXSID7047144	DTXSID7047144	21	1	1	0	0	0	0	0	0	0	0	0	0	0	0	0	0	0	0	0	1	1	0	0	0	0	0	0	2	0	0	1	0	0	0	0	0	0	0	0	3	0	0	0
cyclonite	C009160	cyclonite	121-82-4	DTXSID9024142	DTXSID9024142	21	12	0	0	0	0	0	0	1	0	1	0	0	0	0	0	0	0	0	0	0	0	1	0	0	0	2	0	0	0	0	0	0	0	0	0	0	0	0	0	0	0	0	1
Cyproterone Acetate	D017373	Cyproterone Acetate	427-51-0	DTXSID5020366	DTXSID5020366	21	0	0	0	0	0	0	0	0	0	0	1	0	0	0	0	0	0	0	0	0	0	0	0	0	0	0	0	0	1	0	0	0	0	0	5	0	0	0	0	0	0	0	0
Digitoxin	D004074	Digitoxin	71-63-6	DTXSID0022933	DTXSID0022933	21	4	0	0	0	1	0	0	0	3	1	0	0	3	0	0	0	0	0	0	0	1	0	0	0	0	0	0	0	0	0	0	0	0	2	0	0	0	0	0	0	0	0	0
Etoposide	D005047	Etoposide	33419-42-0	DTXSID5023035	DTXSID5023035	21	1	4	1	0	0	0	0	0	0	0	0	0	0	0	2	1	0	0	0	1	0	0	0	1	0	0	0	0	1	0	0	0	0	1	0	1	0	0	0	0	0	0	0
Galantamine	D005702	Galantamine	357-70-0	DTXSID2045606	DTXSID2045606	21	0	0	0	0	0	1	0	0	0	3	0	0	1	0	0	2	1	0	0	0	0	0	0	5	0	0	1	0	0	0	0	0	0	2	0	0	1	1	0	0	0	0	0
Ganciclovir	D015774	Ganciclovir	82410-32-0	DTXSID8041032	DTXSID8041032	21	3	0	1	2	0	0	0	0	1	0	0	2	0	0	1	0	0	1	0	1	0	1	0	0	0	0	1	0	0	1	1	0	0	1	0	0	0	0	0	0	0	0	0
Guanethidine	D006145	Guanethidine	60-02-6	DTXSID7046966	DTXSID7046966	21	1	2	0	0	0	0	0	0	0	0	0	0	0	0	1	0	0	0	0	0	0	0	0	0	0	0	0	0	0	0	0	0	0	2	0	0	9	0	0	0	0	0	0
Iodoquinol	D004103	Iodoquinol	83-73-8	DTXSID6023155	DTXSID6023155	21	1	1	0	0	0	0	0	0	0	0	0	0	0	0	0	0	0	0	0	0	0	0	0	0	0	0	0	0	0	4	0	0	0	0	0	0	0	0	0	0	0	0	0
Methotrimeprazine	D008728	Methotrimeprazine	60-99-1	DTXSID1023289	DTXSID1023289	21	2	0	0	0	0	1	0	2	0	0	0	0	0	0	0	1	0	0	0	0	0	0	0	0	0	1	1	0	0	0	0	0	1	0	0	0	1	0	1	0	0	0	0
Monensin	D008985	Monensin	17090-79-8	DTXSID4048561	DTXSID4048561	21	0	0	0	1	14	0	1	0	0	1	0	0	0	0	0	0	0	1	0	0	2	0	0	0	0	0	0	0	0	0	0	1	0	0	0	0	0	0	0	0	0	0	0
Naltrexone	D009271	Naltrexone	16590-41-3	DTXSID4046313	DTXSID4046313	21	1	3	0	0	0	0	1	1	1	0	0	0	1	0	0	0	0	0	0	0	0	1	0	1	0	0	2	0	0	0	0	0	0	0	0	0	0	2	0	0	0	0	0
Pefloxacin	D015366	Pefloxacin	70458-92-3	DTXSID3048493	DTXSID3048493	21	3	1	1	2	3	0	0	0	0	0	0	1	0	0	0	0	1	0	2	0	0	1	0	0	0	1	0	0	0	0	0	0	0	0	0	0	0	0	0	0	0	0	0
Sulindac	D013467	Sulindac	38194-50-2	DTXSID4023624	DTXSID4023624	21	0	0	3	1	0	0	0	0	1	0	0	1	1	0	2	0	0	0	0	0	0	0	0	0	0	0	0	0	0	0	0	0	0	0	0	0	0	0	0	0	0	1	0
Thimerosal	D013849	Thimerosal	54-64-8	DTXSID3025540	DTXSID3025540	21	0	6	0	1	0	0	0	0	0	0	0	0	0	0	0	0	0	0	0	0	0	0	0	0	0	0	0	0	0	0	0	0	0	0	0	0	0	0	0	0	0	0	0
1-methyl-4-(2'-methylphenyl)-1,2,3,6-tetrahydropyridine	C048977	1-methyl-4-(2'-methylphenyl)-1,2,3,6-tetrahydropyridine	102417-86-7	DTXSID70877241	DTXSID70877241	20	0	7	0	1	0	0	5	0	0	0	0	0	0	0	0	0	0	0	0	0	0	0	0	0	0	0	0	0	0	0	0	0	0	0	0	0	0	2	0	0	0	0	0
Bromine	D001966	Bromine	7726-95-6	DTXSID1035238	DTXSID1035238	20	0	0	1	1	1	0	0	0	2	0	1	0	0	0	0	0	0	1	0	0	0	0	0	0	0	0	0	1	0	0	1	0	0	0	0	0	0	0	0	4	0	0	0
Cefazolin	D002437	Cefazolin	25953-19-9	DTXSID2022753	DTXSID2022753	20	9	1	1	3	0	0	0	0	0	0	0	1	1	0	0	0	0	0	0	0	0	0	3	0	0	0	0	0	0	0	0	0	0	0	0	0	0	0	0	0	0	0	0
Ceftazidime	D002442	Ceftazidime	78439-06-2	DTXSID0045599	DTXSID0045599	20	1	1	0	4	0	0	0	0	2	0	0	0	0	0	0	0	3	0	1	0	0	1	3	0	0	0	0	0	0	0	0	0	0	0	0	0	1	0	0	0	0	0	1
Chlormethiazole	D002719	Chlormethiazole	533-45-9	DTXSID6022842	DTXSID6022842	20	0	0	0	0	0	0	1	7	2	0	0	0	2	0	0	0	0	0	0	0	0	0	1	2	0	0	0	0	0	0	0	0	0	0	0	0	0	0	0	0	0	0	0
ertapenem	C446479	ertapenem	153832-46-3	DTXSID50165456	DTXSID50165456	20	8	0	1	0	0	0	0	0	3	0	0	2	3	0	0	0	0	0	0	0	0	0	0	0	0	0	0	0	1	0	0	0	0	0	0	0	0	0	0	0	0	0	0
Griseofulvin	D006118	Griseofulvin	126-07-8	DTXSID8020674	DTXSID8020674	20	0	0	1	0	1	0	0	0	1	0	0	0	2	0	1	0	0	1	1	0	0	0	0	0	0	0	0	1	0	0	0	0	0	0	0	0	0	0	0	0	0	0	0
Harmaline	D006246	Harmaline	304-21-2	DTXSID8041038	DTXSID8041038	20	1	0	0	0	0	0	0	0	0	13	0	0	0	0	0	0	0	1	0	0	0	0	0	0	0	0	0	0	0	0	0	0	0	0	0	0	0	1	0	0	0	1	0
Harmine	D006247	Harmine	442-51-3	DTXSID30196066	DTXSID30196066	20	1	0	1	0	0	0	3	0	0	4	1	0	0	0	0	0	0	0	0	0	0	0	0	0	0	0	0	0	0	0	0	0	0	0	0	0	0	1	0	0	0	2	0
Ipratropium	D009241	Ipratropium	60205-81-4	DTXSID9048437	DTXSID9048437	20	0	0	0	0	0	0	0	0	0	3	0	0	0	0	0	0	0	0	0	0	0	1	0	0	0	0	0	0	3	0	0	0	0	0	0	0	0	0	0	0	0	0	0
Methylene Chloride	D008752	Methylene Chloride	75-09-2	DTXSID0020868	DTXSID0020868	20	0	3	0	1	0	0	0	0	0	0	0	2	1	0	0	0	0	0	0	0	0	1	0	0	0	0	0	0	0	0	0	0	0	0	0	1	0	0	0	0	0	0	0
Methylnitrosourea	D008770	Methylnitrosourea	684-93-5	DTXSID4021006	DTXSID4021006	20	0	1	0	3	0	0	0	0	0	0	0	0	0	0	0	0	0	0	0	0	0	0	0	0	0	0	0	0	0	0	0	0	0	0	0	0	0	0	0	0	0	0	0
Norfloxacin	D009643	Norfloxacin	70458-96-7	DTXSID7037680	DTXSID7037680	20	7	3	0	0	2	0	0	0	2	0	0	0	0	0	0	0	0	0	2	0	0	0	0	0	0	0	0	0	0	0	0	0	0	1	0	0	0	0	0	0	0	0	0
Orphenadrine	D009966	Orphenadrine	83-98-7	DTXSID3023396	DTXSID3023396	20	4	0	0	0	0	1	1	1	1	0	0	0	4	0	0	1	0	1	1	0	0	0	1	0	1	1	1	0	0	0	0	0	0	0	0	0	0	0	0	0	0	0	0
oxybutynin	C005419	oxybutynin	1508-65-2	DTXSID3045356	DTXSID3045356	20	1	4	0	0	0	0	0	0	2	0	2	0	2	0	1	0	0	0	0	0	0	4	0	1	0	0	0	0	0	1	0	0	0	0	0	0	0	0	0	0	0	0	0
Pergolide	D010479	Pergolide	66104-22-1	DTXSID2023438	DTXSID2023438	20	0	0	0	0	0	0	0	0	4	1	0	0	0	0	0	1	0	0	0	0	0	2	0	2	0	0	1	0	0	0	0	0	0	0	0	0	2	0	0	0	0	0	0
Potassium Chloride	D011189	Potassium Chloride	7447-40-7	DTXSID5021178	DTXSID5021178	20	1	0	0	1	0	0	0	0	0	0	0	0	0	0	1	1	0	0	0	0	1	0	0	0	0	0	0	0	0	0	0	0	0	0	0	1	0	0	0	0	0	0	0
Rivastigmine	D000068836	Rivastigmine	123441-03-2	DTXSID7023564	DTXSID7023564	20	0	0	1	0	0	0	0	0	1	7	0	0	0	0	0	1	0	0	0	0	0	1	0	0	0	0	0	0	0	0	0	0	0	3	0	0	0	0	0	0	0	0	0
rocuronium	C061870	rocuronium	143558-00-3	DTXSID6048339	DTXSID6048339	20	0	0	0	0	0	0	0	0	0	0	0	0	0	0	0	0	0	0	0	0	8	0	0	0	0	0	0	0	1	0	0	0	0	0	0	0	0	0	0	0	0	0	1
telbivudine	C487779	telbivudine	3424-98-4	DTXSID30187813	DTXSID30187813	20	0	0	3	0	12	0	0	0	0	0	0	0	0	0	0	0	0	0	0	0	0	0	0	0	0	0	0	0	0	0	0	1	0	0	0	0	0	0	0	0	0	0	0
Tetrabenazine	D013747	Tetrabenazine	58-46-8	DTXSID0042614	DTXSID0042614	20	0	1	0	0	0	0	8	0	0	1	0	0	0	0	0	3	0	0	0	0	0	0	0	1	0	0	1	0	0	0	0	0	0	0	0	0	1	1	0	0	0	0	0
Thymidine	D013936	Thymidine	50-89-5	DTXSID5023661	DTXSID5023661	20	0	1	1	0	9	0	0	0	0	0	0	0	0	0	0	0	0	1	0	0	0	0	0	0	0	0	0	0	0	0	0	1	0	0	0	0	0	0	0	0	0	0	0
Tin	D014001	Tin	7440-31-5	DTXSID1049801	DTXSID1049801	20	0	2	0	3	0	0	0	0	0	0	0	0	0	1	0	0	0	1	0	0	2	0	0	0	0	0	0	0	0	0	0	0	0	0	0	8	0	0	0	0	0	0	0
Acrylonitrile	D000181	Acrylonitrile	107-13-1	DTXSID5020029	DTXSID5020029	19	3	1	0	0	0	0	0	0	0	1	0	2	0	0	1	0	0	0	0	0	0	0	0	0	0	0	0	0	0	0	0	0	0	0	0	0	0	1	0	0	0	0	0
Chloral Hydrate	D002697	Chloral Hydrate	302-17-0	DTXSID7020261	DTXSID7020261	19	2	0	0	0	0	0	0	2	1	1	0	1	1	2	0	0	0	0	0	0	0	0	0	0	0	0	0	0	0	0	0	0	0	0	0	0	0	0	0	0	0	0	0
Chlorpropamide	D002747	Chlorpropamide	94-20-2	DTXSID9020322	DTXSID9020322	19	2	0	0	0	0	0	0	4	0	0	0	1	0	0	0	0	0	0	0	0	0	1	0	0	0	0	0	0	0	0	0	0	0	0	0	0	0	0	5	0	0	0	0
Dihydrostreptomycin Sulfate	D004096	Dihydrostreptomycin Sulfate	5490-27-7	DTXSID6045824	DTXSID6045824	19	0	0	0	0	0	0	0	0	0	0	0	0	0	0	0	0	0	0	0	1	1	0	0	0	0	0	0	9	0	0	0	0	0	0	0	0	0	0	0	3	0	0	0
Ezetimibe	D000069438	Ezetimibe	163222-33-1	DTXSID1044223	DTXSID1044223	19	0	0	0	0	16	0	0	0	0	0	0	0	0	0	0	0	0	0	0	0	0	0	0	0	0	0	0	0	0	0	0	0	0	0	0	0	0	0	0	0	0	0	0
Gallamine Triethiodide	D005703	Gallamine Triethiodide	153-76-4	DTXSID60165184	DTXSID60165184	19	3	0	0	0	0	0	0	0	0	0	0	0	0	0	0	0	1	0	0	0	6	0	0	0	0	0	0	0	0	0	0	0	0	0	0	0	0	0	0	0	0	0	0
Magnesium	D008274	Magnesium	7439-95-4	DTXSID0049658	DTXSID0049658	19	1	1	1	0	1	0	0	3	0	0	0	0	0	1	0	0	0	0	1	0	3	0	0	0	0	0	0	0	0	0	0	0	0	0	0	0	0	0	0	0	0	0	2
Mechlorethamine	D008466	Mechlorethamine	55-86-7	DTXSID8025757	DTXSID8025757	19	1	0	0	2	0	0	0	1	0	0	0	2	0	0	1	0	0	0	0	0	0	0	0	0	0	0	0	1	0	0	0	0	0	0	0	1	0	0	0	3	0	0	0
methamidophos	C014655	methamidophos	10265-92-6	DTXSID6024177	DTXSID6024177	19	0	2	8	0	1	0	0	1	0	3	0	1	0	0	0	0	0	1	0	0	0	0	0	0	0	0	0	0	0	0	0	0	0	0	0	0	0	0	0	0	0	0	0
Methyl n-Butyl Ketone	D008742	Methyl n-Butyl Ketone	591-78-6	DTXSID0022068	DTXSID0022068	19	0	8	5	1	0	0	0	0	0	0	0	0	0	0	0	0	0	3	0	0	1	0	0	0	0	0	0	0	0	0	0	0	0	0	0	0	0	0	0	0	0	1	0
nefazodone	C051752	nefazodone	83366-66-9	DTXSID2023357	DTXSID2023357	19	1	1	0	0	0	0	1	1	0	0	0	0	0	0	2	1	0	0	0	0	0	1	0	1	0	0	0	0	0	0	0	0	0	0	0	0	0	0	0	0	0	0	0
Niacinamide	D009536	Niacinamide	98-92-0	DTXSID2020929	DTXSID2020929	19	1	0	0	0	0	0	2	0	0	0	0	0	0	1	0	0	0	0	0	0	1	0	0	0	0	0	0	0	0	0	0	0	1	1	1	2	0	0	0	0	0	0	0
Phenprocoumon	D010644	Phenprocoumon	435-97-2	DTXSID5023459	DTXSID5023459	19	0	0	0	1	2	0	0	0	0	0	0	0	0	5	0	0	0	0	0	0	0	0	0	0	0	0	0	0	0	0	0	0	0	0	0	0	0	0	0	0	2	0	0
Phenylephrine	D010656	Phenylephrine	61-76-7	DTXSID3021142	DTXSID3021142	19	1	0	0	0	0	0	0	1	1	0	0	0	0	1	0	1	0	0	0	0	0	0	0	0	0	1	0	0	1	1	0	0	0	3	0	0	0	0	0	0	1	0	0
Pindolol	D010869	Pindolol	13523-86-9	DTXSID8023476	DTXSID8023476	19	0	0	0	0	1	0	1	1	2	3	0	0	0	0	0	0	0	0	0	0	0	0	0	3	0	0	0	0	0	0	0	0	0	1	0	0	0	0	0	0	0	0	0
Piroxicam	D010894	Piroxicam	36322-90-4	DTXSID5021170	DTXSID5021170	19	1	0	1	0	0	0	0	0	1	1	0	4	0	0	1	0	0	1	0	0	0	1	0	0	0	0	0	0	0	0	1	0	0	0	0	0	1	0	0	1	0	0	0
Praziquantel	D011223	Praziquantel	55268-74-1	DTXSID9021182	DTXSID9021182	19	3	2	0	0	0	0	0	0	0	0	0	1	0	0	0	0	0	0	1	0	0	0	0	0	0	2	0	0	0	0	0	0	0	0	0	0	0	0	0	0	0	0	0
Selegiline	D012642	Selegiline	4528-52-3	DTXSID20196459	DTXSID20196459	19	1	1	0	0	0	1	1	1	4	0	0	1	0	0	0	0	1	1	0	0	0	0	0	0	0	0	2	0	0	0	0	0	0	0	0	0	2	0	0	0	0	0	0
Thioacetamide	D013853	Thioacetamide	62-55-5	DTXSID9021340	DTXSID9021340	19	0	0	0	2	0	0	0	0	0	0	0	0	0	0	0	0	0	0	0	0	0	0	0	0	0	0	0	0	0	0	0	0	0	0	17	0	0	0	0	0	0	0	0
Vidarabine Phosphate	D001084	Vidarabine Phosphate	(blank)	DTXSID401009318	DTXSID401009318	19	0	4	3	3	1	0	0	1	0	0	0	2	0	0	1	0	0	0	0	0	0	0	0	0	0	0	0	0	0	2	0	0	0	0	0	0	0	0	0	0	0	0	0
zaleplon	C085665	zaleplon	151319-34-5	DTXSID5023748	DTXSID5023748	19	0	0	0	0	0	0	0	2	3	0	0	0	0	0	0	0	0	1	0	0	0	0	0	1	0	0	1	0	0	0	0	0	0	0	0	0	0	0	0	0	0	2	0
aluminum sulfate	C041524	aluminum sulfate	10043-67-1	DTXSID9039234	DTXSID9039234	18	1	2	0	5	0	0	0	0	0	0	2	0	1	0	0	0	0	0	0	0	0	0	0	0	0	0	0	0	0	0	0	0	0	0	0	0	0	0	0	0	0	0	0
Amlodipine	D017311	Amlodipine	88150-42-9	DTXSID7022596	DTXSID7022596	18	0	1	1	0	1	0	1	0	0	0	0	0	1	0	0	0	1	0	0	0	0	0	0	0	0	0	0	0	0	0	0	0	0	2	0	0	2	1	0	0	0	0	2
arsenic trioxide	C006632	arsenic trioxide	1327-53-3	DTXSID0020103	DTXSID0020103	18	0	2	4	3	0	0	0	0	0	0	0	0	0	2	1	0	0	0	0	0	0	0	0	0	0	0	0	0	0	1	0	0	0	0	0	0	0	0	0	0	0	0	1
Brimonidine Tartrate	D000068438	Brimonidine Tartrate	(blank)	DTXSID70911371	DTXSID70911371	18	0	1	0	0	0	0	0	1	5	0	0	2	1	0	0	0	0	0	0	0	0	0	0	0	0	0	0	0	0	0	0	0	0	1	0	0	0	0	0	0	0	0	0
Clopenthixol	D003006	Clopenthixol	53772-83-1	DTXSID3048233	DTXSID3048233	18	0	1	0	0	0	4	1	0	2	0	0	0	0	0	0	3	1	0	0	0	0	0	0	0	0	0	0	0	0	0	0	0	0	0	0	0	0	1	0	0	0	0	0
cyclobenzaprine	C004704	cyclobenzaprine	303-53-7	DTXSID0046933	DTXSID0046933	18	1	0	0	0	0	0	0	1	1	0	0	0	4	0	0	0	1	0	0	0	0	0	0	0	0	0	0	0	0	0	0	0	0	2	0	0	0	0	0	0	0	0	0
cypermethrin	C017160	cypermethrin	65732-07-2	DTXSID8058247	DTXSID8058247	18	4	1	2	0	0	0	1	0	0	0	0	0	0	0	2	0	0	0	0	0	0	0	0	0	0	0	0	0	0	0	0	0	0	0	0	0	0	0	0	0	0	0	2
Cyproheptadine	D003533	Cyproheptadine	129-03-3	DTXSID8022872	DTXSID8022872	18	2	0	0	0	0	1	0	1	5	0	0	2	2	0	0	0	0	1	0	0	0	1	0	0	0	0	0	0	0	0	0	0	0	0	0	0	0	0	0	0	0	0	0
Dexmedetomidine	D020927	Dexmedetomidine	113775-47-6	DTXSID10873388	DTXSID10873388	18	0	0	0	0	0	0	0	1	0	0	3	0	7	0	1	0	0	0	1	0	0	0	0	0	1	0	0	0	0	0	0	0	0	0	0	0	0	0	0	0	0	0	0
Gadolinium DTPA	D019786	Gadolinium DTPA	86050-77-3	DTXSID70235367	DTXSID70235367	18	5	0	0	1	0	0	0	1	0	0	0	2	0	1	2	0	1	0	0	0	0	0	0	0	0	0	0	0	0	0	0	0	0	0	0	1	0	0	0	0	0	0	0
methylmercuric chloride	C004925	methylmercuric chloride	54173-04-5	DTXSID20202524	DTXSID20202524	18	1	3	2	1	0	0	0	0	0	0	0	0	0	0	0	0	0	2	0	0	0	0	0	0	0	0	0	0	0	0	1	0	1	0	0	0	0	0	0	0	0	0	0
Mycophenolic Acid	D009173	Mycophenolic Acid	24280-93-1	DTXSID4041070	DTXSID4041070	18	0	1	0	0	3	0	0	0	0	0	0	0	0	0	0	0	0	0	0	0	0	0	0	0	0	1	0	0	0	0	0	0	0	0	0	0	0	0	0	0	0	0	0
Netilmicin	D009428	Netilmicin	56391-56-1	DTXSID1048542	DTXSID1048542	18	1	0	0	0	0	0	0	0	0	0	0	0	0	0	0	0	0	0	0	4	0	0	0	0	0	0	0	10	0	0	1	0	0	0	0	0	0	0	0	0	0	0	0
Okadaic Acid	D019319	Okadaic Acid	78111-17-8	DTXSID60880002	DTXSID60880002	18	0	1	0	0	0	0	0	0	0	0	6	0	0	0	0	0	0	0	1	0	0	0	0	0	0	0	0	0	0	0	0	0	0	0	0	0	0	0	0	0	0	0	0
Oxyquinoline	D015125	Oxyquinoline	148-24-3	DTXSID5020730	DTXSID5020730	18	0	3	0	0	0	0	0	0	0	0	0	0	0	0	1	0	0	0	0	0	0	0	0	0	0	0	0	0	0	0	0	0	0	0	0	0	0	0	0	0	0	0	0
Prenylamine	D011299	Prenylamine	390-64-7	DTXSID0048555	DTXSID0048555	18	0	0	0	0	0	1	1	0	0	0	0	0	0	0	0	0	0	0	0	0	0	0	0	0	0	0	0	0	0	0	0	0	0	14	0	0	0	0	0	0	0	0	0
Propylthiouracil	D011441	Propylthiouracil	51-52-5	DTXSID5021209	DTXSID5021209	18	0	1	1	0	0	0	0	0	0	0	0	1	0	0	0	0	0	0	0	0	0	1	0	0	0	0	0	0	1	0	2	0	0	0	1	0	0	0	0	1	0	0	0
sibutramine	C058254	sibutramine	106650-56-0	DTXSID1023578	DTXSID1023578	18	1	0	0	0	0	0	0	1	0	1	1	0	1	0	0	0	0	0	0	0	0	0	0	0	0	0	3	0	3	0	0	0	0	1	0	0	0	0	0	0	0	1	0
Tacrine	D013619	Tacrine	321-64-2	DTXSID1037272	DTXSID1037272	18	3	0	0	0	1	0	4	0	0	4	0	0	1	0	0	0	0	0	0	0	0	0	0	0	0	0	0	0	0	0	0	0	0	0	0	0	1	0	0	0	0	1	0
1,1,1-trichloroethane	C024566	1,1,1-trichloroethane	71-55-6	DTXSID0021381	DTXSID0021381	17	1	1	4	2	0	0	0	1	0	0	0	0	0	0	2	0	0	0	0	0	0	0	0	0	0	0	0	0	0	0	0	0	0	0	0	1	0	0	0	0	0	0	0
Amobarbital	D000654	Amobarbital	64-43-7	DTXSID40213975	DTXSID40213975	17	1	0	0	0	0	0	0	1	0	0	6	0	0	0	0	0	0	1	0	0	0	1	0	0	0	0	0	0	0	0	0	0	0	0	0	0	0	0	0	0	0	0	0
Carbimazole	D002231	Carbimazole	22232-54-8	DTXSID9022736	DTXSID9022736	17	0	0	0	0	0	0	0	0	0	0	0	0	0	0	0	0	0	0	0	0	0	0	0	0	0	0	0	0	0	0	1	0	0	1	1	0	0	0	0	1	0	0	0
Cetirizine	D017332	Cetirizine	83881-52-1	DTXSID2044268	DTXSID2044268	17	0	0	0	0	0	0	0	0	0	0	1	1	0	0	0	5	0	1	0	0	0	0	0	0	0	0	2	0	0	0	0	0	0	0	0	0	0	0	0	0	0	0	0
Chlordiazepoxide	D002707	Chlordiazepoxide	58-25-3	DTXSID4046022	DTXSID4046022	17	4	0	0	0	0	0	0	2	1	0	1	0	0	0	0	0	1	2	0	0	0	0	0	0	0	1	0	0	0	0	0	0	0	0	0	0	0	0	0	0	0	1	0
Choline	D002794	Choline	67-48-1	DTXSID4020325	DTXSID4020325	17	0	1	0	0	0	0	0	0	0	1	3	0	0	0	0	0	0	0	0	1	0	0	0	0	0	1	0	0	0	0	0	0	0	0	0	0	0	0	0	0	0	1	0
EMLA	C036626	EMLA	101362-25-8	DTXSID60893697	DTXSID60893697	17	3	0	0	0	0	0	0	4	0	1	0	1	0	0	0	0	0	0	0	0	0	0	0	0	0	1	0	0	0	0	0	0	0	0	0	0	0	0	0	0	0	0	0
Ethosuximide	D005013	Ethosuximide	77-67-8	DTXSID7023019	DTXSID7023019	17	2	1	0	2	0	0	2	0	0	1	0	0	0	0	0	0	0	1	2	0	0	0	0	0	0	1	0	0	0	0	0	0	1	0	0	0	0	0	0	0	0	0	0
Floxuridine	D005467	Floxuridine	50-91-9	DTXSID3023057	DTXSID3023057	17	0	2	2	4	0	0	0	0	0	1	0	1	0	0	1	0	0	0	0	0	0	0	0	0	0	0	0	0	0	0	0	0	0	0	0	0	0	0	0	0	0	0	0
Flurothyl	D005481	Flurothyl	333-36-8	DTXSID5046516	DTXSID5046516	17	14	0	0	0	0	0	0	0	0	0	0	0	0	0	0	0	0	0	0	0	0	0	2	0	0	0	0	0	0	0	0	0	0	0	0	0	0	0	0	0	0	1	0
Iodine	D007455	Iodine	7553-56-2	DTXSID7034672	DTXSID7034672	17	1	4	0	0	0	0	0	0	0	0	0	0	0	0	0	0	0	0	0	1	0	0	0	0	0	0	0	0	0	2	0	0	0	0	0	0	0	0	0	1	0	0	0
irinotecan	C051890	irinotecan	86639-52-3	DTXSID4040399	DTXSID4040399	17	0	0	3	0	0	0	0	0	0	0	0	0	0	0	0	0	0	1	0	0	0	0	0	0	0	0	0	0	0	0	0	0	0	0	0	0	0	0	0	0	0	0	0
Labetalol	D007741	Labetalol	36894-69-6	DTXSID2023191	DTXSID2023191	17	0	1	0	0	1	0	0	0	0	1	0	0	0	0	3	0	0	0	0	0	0	0	0	0	0	0	0	0	0	0	0	0	0	0	0	0	6	0	0	0	0	0	1
lacosamide	C403507	lacosamide	175481-36-4	DTXSID1057666	DTXSID1057666	17	0	2	0	0	0	0	0	1	1	0	0	0	0	0	0	0	0	2	0	0	0	0	1	0	0	0	0	0	1	0	0	0	0	0	0	0	0	0	0	0	0	0	0
Meprobamate	D008620	Meprobamate	57-53-4	DTXSID3023261	DTXSID3023261	17	2	0	0	0	1	0	0	6	2	0	0	0	1	0	0	0	0	1	0	0	0	0	0	0	0	0	0	0	0	0	0	0	0	0	0	0	0	0	0	0	0	0	0
Mercaptopurine	D015122	Mercaptopurine	6112-76-1	DTXSID9025538	DTXSID9025538	17	1	0	0	0	2	0	0	0	0	0	0	0	0	0	2	0	0	0	0	0	1	0	0	0	0	0	0	0	0	0	0	0	0	0	1	0	0	0	0	0	0	0	0
Methyl Parathion	D008743	Methyl Parathion	298-00-0	DTXSID1020855	DTXSID1020855	17	2	0	0	0	0	1	0	0	0	1	2	1	0	0	0	0	0	0	0	0	1	0	0	0	0	0	0	0	0	0	0	0	0	0	0	0	0	0	0	0	0	0	1
Nitric Oxide	D009569	Nitric Oxide	10102-43-9	DTXSID1020938	DTXSID1020938	17	0	3	0	0	0	0	1	0	0	0	0	2	0	1	0	0	0	0	0	0	0	0	0	0	0	0	0	0	1	0	0	0	0	0	0	0	0	0	0	0	1	0	0
Ouabain	D010042	Ouabain	630-60-4	DTXSID0043765	DTXSID0043765	17	3	0	0	2	0	0	0	0	0	0	0	0	0	0	0	0	0	0	0	0	1	0	0	0	0	0	0	0	0	0	0	0	0	0	0	1	0	0	0	0	0	0	0
ropinirole	C046649	ropinirole	91374-21-9	DTXSID8045195	DTXSID8045195	17	0	1	0	0	0	0	1	0	3	0	1	0	0	0	0	1	0	0	0	0	0	0	0	2	0	0	0	0	0	0	0	0	0	1	0	0	1	1	0	0	1	0	0
Thorium Dioxide	D013911	Thorium Dioxide	1314-20-1	DTXSID0051657	DTXSID0051657	17	0	0	2	1	0	0	0	0	0	0	0	0	0	0	0	0	0	0	0	0	0	0	0	0	0	0	0	0	0	0	0	0	0	0	0	0	0	0	0	0	0	0	0
6-Aminonicotinamide	D015120	6-Aminonicotinamide	329-89-5	DTXSID5051446	DTXSID5051446	16	0	0	1	0	0	0	1	0	0	0	0	2	0	0	0	0	0	0	0	0	0	0	0	0	0	0	0	0	0	0	0	0	0	0	0	2	0	0	0	0	0	0	0
Diazinon	D003976	Diazinon	333-41-5	DTXSID9020407	DTXSID9020407	16	2	1	0	0	1	0	0	1	0	0	0	0	0	0	0	0	0	1	0	0	1	0	0	0	0	0	0	0	0	0	0	0	0	0	0	0	0	0	0	0	0	0	0
Disopyramide	D004206	Disopyramide	3737-09-5	DTXSID1045536	DTXSID1045536	16	2	0	2	1	0	0	0	1	0	0	0	0	0	0	1	0	0	0	0	0	1	1	0	0	0	1	0	0	0	0	0	0	0	5	0	0	0	0	0	0	0	0	0
Dothiepin	D004308	Dothiepin	897-15-4	DTXSID7047778	DTXSID7047778	16	4	0	0	0	0	1	0	0	1	0	0	0	1	0	0	0	0	0	0	0	0	1	0	0	0	0	0	0	0	0	0	0	0	0	0	0	0	0	2	0	0	0	0
Ethylenethiourea	D005031	Ethylenethiourea	96-45-7	DTXSID5020601	DTXSID5020601	16	0	0	0	0	0	0	0	0	0	0	0	0	0	0	0	0	0	1	0	0	1	0	0	0	0	0	0	0	0	0	0	0	0	0	0	0	0	0	0	0	0	0	0
Finasteride	D018120	Finasteride	98319-26-7	DTXSID3020625	DTXSID3020625	16	0	0	0	0	1	0	0	0	0	0	0	0	0	0	0	0	0	0	0	0	0	0	0	2	0	0	0	0	1	0	1	0	0	0	0	0	0	0	0	0	0	0	1
Fluorescein	D019793	Fluorescein	6417-85-2	DTXSID9064348	DTXSID9064348	16	4	0	0	0	0	0	0	0	0	0	0	0	0	0	1	0	0	0	0	0	1	0	1	0	0	2	0	0	0	0	0	0	0	0	0	0	0	0	0	0	0	0	0
iocarmate meglumine	C025504	iocarmate meglumine	(blank)	DTXSID101009319	DTXSID101009319	16	1	0	0	1	0	0	0	0	0	0	0	0	0	0	0	0	0	0	0	0	0	1	0	0	0	2	0	0	0	0	0	0	0	0	0	0	0	0	0	0	0	0	0
iopromide	C038192	iopromide	73334-07-3	DTXSID0023163	DTXSID0023163	16	0	0	0	0	0	0	0	0	0	0	0	1	0	0	0	0	0	0	0	0	0	0	0	0	0	0	0	0	0	1	0	0	0	0	0	3	0	0	0	0	0	0	0
Kaolin	D007616	Kaolin	1332-58-7	DTXSID6049640	DTXSID6049640	16	0	0	0	2	0	0	0	0	0	0	0	0	0	0	0	0	0	0	0	0	0	0	0	0	0	0	0	0	0	0	0	0	0	0	0	0	0	0	0	0	0	0	0
Nitroprusside	D009599	Nitroprusside	14402-89-2	DTXSID2036794	DTXSID2036794	16	1	0	0	1	0	0	0	1	0	1	0	0	1	0	0	0	0	0	0	0	0	0	0	0	0	1	0	0	0	1	0	0	0	1	0	1	0	0	0	0	0	0	0
Papaverine	D010208	Papaverine	58-74-2	DTXSID4023418	DTXSID4023418	16	1	0	0	0	0	0	0	1	0	0	0	0	0	1	0	0	0	0	0	0	0	0	0	0	0	0	0	0	0	2	1	0	0	0	0	0	0	0	0	0	0	0	0
Sphingosine	D013110	Sphingosine	(blank)	DTXSID90861763	DTXSID90861763	16	0	0	0	1	0	0	0	0	0	0	0	0	0	1	0	0	0	0	0	0	1	0	0	0	1	0	0	0	0	1	0	0	0	0	0	0	0	0	0	0	0	0	0
Sulfur	D013455	Sulfur	7704-34-9	DTXSID9034941	DTXSID9034941	16	1	0	1	1	0	0	0	0	0	0	0	1	0	0	0	0	0	0	0	0	0	0	0	0	0	0	0	0	0	0	0	0	0	0	0	0	0	0	0	0	0	0	0
tamsulosin	C088482	tamsulosin	106463-17-6	DTXSID2046628	DTXSID2046628	16	0	0	0	0	0	0	0	0	0	0	0	0	0	0	0	0	0	0	0	0	0	0	0	0	0	0	0	0	0	0	0	0	0	0	0	0	8	0	0	0	0	0	0
Terfenadine	D016593	Terfenadine	50679-08-8	DTXSID2023642	DTXSID2023642	16	1	0	0	1	0	0	0	1	0	1	0	3	0	0	0	0	0	0	0	0	0	0	0	0	0	2	0	0	0	0	0	0	0	6	0	0	0	0	0	0	0	0	0
Tyramine	D014439	Tyramine	51-67-2	DTXSID2043874	DTXSID2043874	16	0	0	1	0	0	0	0	1	0	0	0	0	0	2	0	0	0	0	0	0	0	0	0	0	0	0	0	0	0	0	0	0	0	0	1	0	0	0	0	0	0	0	0
1-Propanol	D000433	1-Propanol	71-23-8	DTXSID2021739	DTXSID2021739	15	0	0	0	2	1	0	0	7	0	0	0	0	0	0	0	0	0	0	0	0	0	0	0	0	0	0	0	0	0	1	0	0	0	0	0	0	0	0	0	0	0	0	0
4-dichlorobenzene	C018511	4-dichlorobenzene	106-46-7	DTXSID1020431	DTXSID1020431	15	0	1	0	1	0	0	0	0	0	0	0	0	0	0	0	0	0	0	0	0	0	0	0	0	0	0	0	0	0	0	0	0	0	0	0	0	0	0	0	0	0	0	1
Adenine	D000225	Adenine	73-24-5	DTXSID6022557	DTXSID6022557	15	0	1	1	0	2	0	0	0	0	0	1	1	0	0	0	0	0	0	0	0	0	0	0	0	0	0	4	0	0	0	0	0	0	0	0	0	0	0	0	0	0	0	0
Aminopyrine	D000632	Aminopyrine	58-15-1	DTXSID7020504	DTXSID7020504	15	4	1	0	0	0	0	0	1	1	0	0	0	0	0	0	0	0	0	0	0	2	0	0	0	0	0	0	0	0	0	0	0	0	0	1	0	0	0	0	0	0	0	0
Arabinofuranosyluracil	D001086	Arabinofuranosyluracil	3083-77-0	DTXSID80184832	DTXSID80184832	15	0	1	1	0	9	0	0	0	0	0	0	1	0	0	0	0	0	0	0	0	0	0	0	0	0	0	0	0	0	0	0	0	0	0	0	0	0	0	0	0	0	0	0
Benperidol	D001544	Benperidol	2062-84-2	DTXSID7045364	DTXSID7045364	15	0	0	0	0	2	1	0	0	0	4	0	0	0	0	0	0	0	1	0	0	0	0	0	0	0	0	0	0	0	0	0	0	1	0	0	0	0	0	0	0	0	1	0
Bromisovalum	D001968	Bromisovalum	496-67-3	DTXSID2040656	DTXSID2040656	15	0	0	1	0	0	0	0	0	0	0	0	0	0	0	0	1	1	1	0	0	0	0	0	0	0	0	0	0	0	0	0	0	0	0	0	0	0	0	0	0	0	0	0
Carbaryl	D012721	Carbaryl	63-25-2	DTXSID9020247	DTXSID9020247	15	3	5	1	0	1	0	0	1	0	0	0	0	0	0	0	0	0	0	0	0	0	1	0	0	0	0	0	0	0	0	0	0	0	0	0	0	0	0	0	0	0	0	0
Chlorthalidone	D002752	Chlorthalidone	77-36-1	DTXSID4022812	DTXSID4022812	15	0	0	0	0	3	1	1	2	0	0	0	0	0	0	0	0	0	0	0	0	0	0	0	1	0	0	0	0	0	0	0	0	0	0	1	1	2	0	0	0	0	0	0
clebopride	C014417	clebopride	57645-39-3	DTXSID10206339	DTXSID10206339	15	0	0	0	0	0	2	4	0	0	0	0	0	0	0	0	2	0	0	0	0	0	0	0	0	0	0	0	0	0	0	0	0	0	0	0	0	0	1	0	0	0	0	0
Dacarbazine	D003606	Dacarbazine	4342-03-4	DTXSID0020369	DTXSID0020369	15	0	2	1	2	0	0	0	0	0	0	0	0	0	0	1	0	0	0	1	0	0	0	0	0	0	0	0	0	0	0	0	0	0	0	1	0	0	0	0	0	0	0	0
Dichlorodiphenyl Dichloroethylene	D003633	Dichlorodiphenyl Dichloroethylene	72-55-9	DTXSID9020374	DTXSID9020374	15	1	0	0	0	0	0	0	0	0	3	0	0	0	0	0	0	0	0	0	0	0	0	0	0	0	0	0	0	0	0	0	0	0	0	0	0	0	0	0	0	0	0	0
haloperidol decanoate	C033563	haloperidol decanoate	74050-97-8	DTXSID50224951	DTXSID50224951	15	0	1	0	0	0	2	3	0	0	0	0	0	0	0	0	0	1	0	0	0	0	0	0	0	0	0	0	0	0	0	0	0	0	0	0	0	0	1	0	0	0	0	0
HhAntag691	C538724	HhAntag691	879085-55-9	DTXSID40236689	DTXSID40236689	15	0	0	0	0	1	0	0	0	0	0	0	0	0	0	0	0	0	0	0	0	0	0	0	0	0	0	0	0	0	0	0	0	0	0	0	0	0	0	0	0	0	0	0
Hydrocodone	D006853	Hydrocodone	143-71-5	DTXSID40162277	DTXSID40162277	15	1	0	0	0	0	0	0	2	1	0	0	0	0	0	0	0	1	0	0	0	0	0	0	0	1	0	0	0	0	0	3	0	0	0	1	0	0	0	0	0	0	0	0
lead acetate	C008261	lead acetate	15347-57-6	DTXSID10274073	DTXSID10274073	15	1	1	0	0	0	0	0	0	0	0	4	0	0	0	0	0	0	0	0	1	0	0	0	0	0	0	0	0	0	0	0	0	0	0	0	1	0	0	0	0	0	0	0
lenalidomide	C467567	lenalidomide	191732-72-6	DTXSID8046664	DTXSID8046664	15	0	1	7	0	0	0	0	0	0	1	1	0	0	0	0	0	0	0	0	0	0	0	0	0	0	0	1	0	1	0	0	1	0	0	0	0	0	0	0	0	0	0	0
methylprednisolone acetate	C000873	methylprednisolone acetate	13209-52-4	DTXSID70628391	DTXSID70628391	15	1	1	0	0	1	0	0	0	0	0	0	0	1	0	1	0	0	0	0	0	0	0	0	0	0	0	0	0	0	0	0	0	0	0	0	0	0	0	0	0	0	0	0
Nomifensine	D009627	Nomifensine	24526-64-5	DTXSID0023377	DTXSID0023377	15	4	0	0	0	0	1	0	0	0	2	0	0	0	0	0	0	0	0	2	0	0	0	0	3	0	0	0	0	0	0	0	0	0	0	0	0	0	0	0	0	0	0	0
Norgestrel	D009644	Norgestrel	797-63-7	DTXSID3036496	DTXSID3036496	15	0	0	0	0	0	0	0	0	0	0	0	0	0	0	0	0	0	0	0	0	0	0	0	0	0	0	0	0	1	0	0	0	0	0	0	0	0	0	0	0	0	0	0
Phenylphosphonothioic Acid, 2-Ethyl 2-(4-Nitrophenyl) Ester	D004849	Phenylphosphonothioic Acid, 2-Ethyl 2-(4-Nitrophenyl) Ester	2104-64-5	DTXSID7022174	DTXSID7022174	15	0	7	0	0	0	0	0	0	0	0	0	0	0	0	0	0	0	6	0	0	1	0	0	0	0	0	0	0	0	0	0	0	0	0	0	0	0	0	0	0	0	0	0
Piperacillin	D010878	Piperacillin	61477-96-1	DTXSID2023482	DTXSID2023482	15	3	1	0	1	0	0	0	0	3	0	0	0	1	0	0	0	1	0	0	0	0	2	0	0	0	0	0	1	0	0	0	0	0	0	0	0	0	0	0	0	0	0	0
Piribedil	D010891	Piribedil	78213-63-5	DTXSID20228860	DTXSID20228860	15	0	0	1	1	0	0	2	0	2	0	0	0	0	0	0	0	0	0	0	0	0	1	0	4	0	0	0	0	0	0	0	0	2	0	0	0	0	0	0	0	0	0	0
Pyrazinamide	D011718	Pyrazinamide	98-96-4	DTXSID9021215	DTXSID9021215	15	2	0	0	0	2	0	0	0	0	0	0	0	0	0	1	0	0	0	0	0	0	0	0	0	0	0	0	0	0	0	0	0	0	0	2	0	0	0	0	0	0	0	0
Spironolactone	D013148	Spironolactone	52-01-7	DTXSID6034186	DTXSID6034186	15	1	0	0	0	0	0	0	1	0	0	0	0	0	0	0	0	0	0	1	0	6	0	0	0	0	0	0	0	0	0	0	1	0	1	2	0	0	0	0	0	0	0	0
Trimetazidine	D014292	Trimetazidine	5011-34-7	DTXSID2048531	DTXSID2048531	15	0	0	0	0	0	1	5	0	1	1	0	0	0	0	0	0	0	0	0	0	0	0	0	0	0	0	0	0	0	0	0	0	0	0	0	0	0	2	0	0	0	0	0
Tubocurarine	D014403	Tubocurarine	57-95-4	DTXSID0048393	DTXSID0048393	15	0	0	0	0	0	0	0	0	1	0	0	0	0	0	0	0	0	0	0	0	10	0	0	0	0	0	0	0	0	0	0	0	0	0	0	0	0	0	0	0	0	0	0
Vardenafil Dihydrochloride	D000069058	Vardenafil Dihydrochloride	(blank)	DTXSID90945153	DTXSID90945153	15	0	0	0	0	0	0	0	0	0	0	0	0	0	2	0	0	0	0	1	1	0	0	0	0	0	1	0	0	0	0	0	0	0	0	0	0	0	0	0	0	0	0	0
1,4-butanediol	C039681	1,4-butanediol	110-63-4	DTXSID2024666	DTXSID2024666	14	7	0	0	0	0	0	0	4	0	0	0	0	0	0	0	0	0	1	0	0	0	0	0	0	0	0	0	0	0	0	0	0	0	0	0	0	0	0	0	0	0	0	0
alpha-Amino-3-hydroxy-5-methyl-4-isoxazolepropionic Acid	D018350	alpha-Amino-3-hydroxy-5-methyl-4-isoxazolepropionic Acid	(blank)	DTXSID20868301	DTXSID20868301	14	2	0	0	1	0	0	0	0	0	0	0	0	0	0	0	0	0	0	1	0	2	0	0	0	2	0	0	0	0	0	1	0	0	0	0	0	0	0	0	0	0	0	0
Amygdalin	D000678	Amygdalin	29883-15-6	DTXSID00897159	DTXSID00897159	14	1	0	2	1	1	0	1	1	0	0	0	1	0	0	0	0	0	0	0	0	0	0	0	0	0	0	0	1	0	0	0	0	0	0	0	0	0	0	0	0	0	0	2
artesunate	C039726	artesunate	82864-68-4	DTXSID70232038	DTXSID70232038	14	0	2	0	1	0	1	0	0	0	0	0	2	0	0	0	0	0	1	0	1	0	0	0	0	0	0	0	0	0	0	0	0	0	0	0	0	0	0	0	0	0	0	0
Benserazide	D001545	Benserazide	14919-77-8	DTXSID0045412	DTXSID0045412	14	0	0	0	0	0	0	1	0	1	0	0	0	0	0	0	0	0	0	0	0	0	2	0	0	0	0	0	0	0	0	0	0	3	0	0	0	0	0	0	0	0	0	0
Benzo(a)pyrene	D001564	Benzo(a)pyrene	50-32-8	DTXSID2020139	DTXSID2020139	14	0	4	0	0	0	0	0	0	0	0	1	0	0	0	0	0	0	0	0	0	0	0	0	0	0	0	0	0	0	0	0	0	0	0	0	0	0	0	0	0	0	0	0
Budesonide	D019819	Budesonide	51333-22-3	DTXSID8020202	DTXSID8020202	14	0	0	0	0	0	0	1	0	1	0	0	0	1	0	0	0	0	0	0	0	0	0	0	1	0	0	0	0	0	0	0	0	0	0	0	0	0	0	0	0	0	0	0
Chlorpheniramine	D002744	Chlorpheniramine	1405-56-7	DTXSID90161417	DTXSID90161417	14	3	0	0	0	0	0	0	0	2	0	2	2	0	0	0	1	0	1	0	0	0	0	0	0	0	0	0	0	0	0	0	0	0	0	0	0	0	0	0	0	0	0	0
cilastatin, imipenem drug combination	C044650	cilastatin, imipenem drug combination	92309-29-0	DTXSID90872430	DTXSID90872430	14	8	0	0	1	0	0	0	0	0	1	0	1	0	0	0	0	0	0	0	0	0	0	0	0	0	0	0	0	0	0	0	0	0	0	0	0	0	0	0	0	0	0	0
Cisapride	D020117	Cisapride	81098-60-4	DTXSID3022825	DTXSID3022825	14	1	1	0	0	0	1	1	0	0	1	0	0	0	0	0	3	0	0	0	0	0	0	0	0	0	0	0	0	0	0	0	0	0	4	0	0	0	0	0	0	0	0	0
Clevudine	C034935	Clevudine	163252-36-6	DTXSID2057659	DTXSID2057659	14	0	1	0	0	9	0	0	0	0	0	0	1	0	0	0	0	0	0	0	0	0	0	0	0	0	0	0	0	0	0	0	0	0	0	0	0	0	0	0	0	0	0	0
Clindamycin	D002981	Clindamycin	21462-39-5	DTXSID4045428	DTXSID4045428	14	0	0	0	0	0	0	0	0	0	0	0	0	0	0	1	0	0	0	0	0	2	0	0	0	0	0	0	3	0	0	0	0	0	0	0	0	0	0	0	0	0	0	0
Diazoxide	D003981	Diazoxide	364-98-7	DTXSID7022914	DTXSID7022914	14	0	0	0	0	0	3	2	3	0	0	0	0	0	0	0	0	0	1	1	0	0	0	0	0	0	0	0	0	0	1	0	0	1	0	0	0	0	0	0	0	0	0	0
doxifluridine	C025034	doxifluridine	3094-09-5	DTXSID2022967	DTXSID2022967	14	0	2	1	2	0	0	0	0	0	1	0	1	0	0	1	0	0	0	0	0	0	0	0	0	0	0	0	0	0	0	0	0	0	0	0	0	0	0	0	0	0	0	0
eribulin	C490954	eribulin	(blank)	DTXSID101009321	DTXSID101009321	14	0	0	11	0	0	0	0	0	0	0	0	0	0	0	0	0	0	0	0	0	0	0	0	0	0	0	0	0	0	0	0	1	0	0	0	0	0	0	0	0	0	0	0
erythromycin lactobionate	C010948	erythromycin lactobionate	(blank)	DTXSID801009322	DTXSID801009322	14	0	0	0	0	0	0	0	0	0	0	0	0	0	0	0	0	0	0	0	2	0	0	0	0	0	0	0	1	0	0	4	0	0	0	0	0	0	0	0	1	0	0	0
Ethidium	D004996	Ethidium	3546-21-2	DTXSID9048487	DTXSID9048487	14	0	0	0	1	0	0	0	0	0	0	0	0	0	0	0	0	0	0	0	0	0	0	0	0	0	0	0	0	0	0	0	0	0	0	0	0	0	0	0	0	0	0	0
Famotidine	D015738	Famotidine	76824-35-6	DTXSID5023039	DTXSID5023039	14	1	1	0	1	0	0	0	0	0	0	0	1	3	0	0	0	0	0	1	0	0	2	0	0	0	0	0	0	0	0	0	0	0	0	0	0	0	0	0	0	0	0	0
felbamate	C047360	felbamate	25451-15-4	DTXSID9023041	DTXSID9023041	14	5	0	0	0	0	0	0	0	0	0	0	0	0	0	0	0	0	1	0	0	0	0	1	2	0	0	2	0	0	0	0	0	0	0	0	0	0	0	0	0	0	0	0
Flurazepam	D005479	Flurazepam	36105-20-1	DTXSID40189686	DTXSID40189686	14	1	0	0	0	0	0	0	0	0	0	0	0	0	0	0	0	0	1	0	0	0	1	0	1	0	0	1	0	0	0	0	0	0	0	0	0	0	0	0	0	0	1	0
Gadolinium	D005682	Gadolinium	7440-54-2	DTXSID5037234	DTXSID5037234	14	2	0	0	5	0	0	0	0	0	0	0	0	0	0	2	0	0	0	0	0	0	0	0	0	0	0	0	0	0	0	0	0	0	0	0	0	0	1	0	0	0	0	0
Hydroxyzine	D006919	Hydroxyzine	2192-20-3	DTXSID2040737	DTXSID2040737	14	2	0	0	0	0	1	0	0	1	0	0	0	0	0	0	0	0	0	0	0	0	1	0	1	0	1	1	0	0	0	0	0	0	1	0	0	0	0	0	0	0	1	0
Lamivudine	D019259	Lamivudine	134678-17-4	DTXSID7023194	DTXSID7023194	14	0	0	4	0	1	1	0	0	0	0	0	0	0	0	0	1	0	0	0	0	0	0	0	0	0	0	1	1	0	0	0	0	0	0	1	0	0	0	0	0	0	0	0
Levonorgestrel	D016912	Levonorgestrel	797-63-7	DTXSID3036496	DTXSID3036496	14	0	0	1	0	0	0	0	0	0	0	0	0	0	0	0	0	0	0	0	0	0	0	0	0	0	0	0	0	0	0	0	0	0	0	0	0	0	0	0	0	0	0	0
liposomal doxorubicin	C506643	liposomal doxorubicin	23214-92-8	DTXSID8021480	DTXSID8021480	14	0	0	0	0	0	0	0	0	0	0	0	0	0	0	14	0	0	0	0	0	0	0	0	0	0	0	0	0	0	0	0	0	0	0	0	0	0	0	0	0	0	0	0
Methane	D008697	Methane	74-82-8	DTXSID8025545	DTXSID8025545	14	0	1	2	2	0	0	1	0	0	0	0	0	0	0	0	0	0	0	0	0	0	0	1	0	0	2	0	0	0	0	0	0	0	0	0	0	0	0	0	0	0	0	0
methylethyl ketone	C005222	methylethyl ketone	78-93-3	DTXSID3021516	DTXSID3021516	14	0	5	1	0	0	0	0	0	0	3	1	0	0	0	0	0	1	1	0	0	1	0	0	0	0	0	0	0	0	0	0	1	0	0	0	0	0	0	0	0	0	0	0
Mexiletine	D008801	Mexiletine	31828-71-4	DTXSID8048446	DTXSID8048446	14	1	2	0	0	0	0	0	0	1	4	0	2	0	0	0	0	0	1	0	0	0	0	1	0	0	0	0	0	0	0	0	0	0	0	0	0	0	0	0	0	0	0	0
mivacurium	C049430	mivacurium	106861-44-3	DTXSID5046649	DTXSID5046649	14	0	0	0	0	1	0	0	0	0	0	0	0	0	0	0	0	0	0	0	0	11	0	0	0	0	0	0	0	0	0	0	0	0	0	0	0	0	0	0	0	0	0	0
nelarabine	C104457	nelarabine	121032-29-9	DTXSID6046842	DTXSID6046842	14	1	0	2	0	0	0	0	0	0	0	0	0	0	0	2	0	0	0	0	0	0	0	0	0	0	0	0	0	0	0	0	0	0	0	0	0	0	0	0	0	0	0	0
normeperidine	C002752	normeperidine	77-17-8	DTXSID50227806	DTXSID50227806	14	5	0	0	0	0	0	0	0	0	1	0	1	0	0	0	0	1	0	0	0	0	0	0	0	0	3	0	0	0	0	0	0	0	0	0	1	0	0	0	0	0	0	0
Potassium	D011188	Potassium	7440-09-7	DTXSID9049748	DTXSID9049748	14	1	1	0	0	0	0	0	2	0	0	0	0	0	0	0	0	0	0	3	1	1	1	0	0	0	0	0	0	0	0	0	0	0	0	0	0	0	0	0	0	0	0	0
Practolol	D011217	Practolol	6673-35-4	DTXSID0021179	DTXSID0021179	14	0	0	0	0	1	0	0	0	0	1	0	0	0	0	0	0	0	0	0	0	0	0	0	0	0	0	1	4	0	1	0	0	0	0	0	0	0	0	0	2	0	0	0
Raloxifene Hydrochloride	D020849	Raloxifene Hydrochloride	82640-04-8	DTXSID1034181	DTXSID1034181	14	0	0	0	0	0	0	0	0	0	0	0	0	0	0	0	0	0	0	0	0	0	0	0	0	0	0	0	0	10	0	0	0	0	0	0	0	0	0	0	0	0	0	0
Tetracaine	D013748	Tetracaine	94-24-6	DTXSID1043883	DTXSID1043883	14	4	0	0	0	0	0	0	1	0	0	0	0	0	0	0	0	0	0	0	0	0	0	0	0	0	1	0	0	0	0	0	0	0	0	0	0	0	0	0	0	0	0	0
Thiourea	D013890	Thiourea	62-56-6	DTXSID9021348	DTXSID9021348	14	0	1	0	0	0	0	0	0	0	0	0	0	0	0	0	0	0	0	0	0	3	0	0	0	0	0	0	0	0	0	0	0	1	0	0	0	0	0	0	0	0	0	4
Vitamin B 6	D025101	Vitamin B 6	65-23-6	DTXSID4023541	DTXSID4023541	14	0	0	3	0	0	0	0	0	0	0	0	0	0	0	1	0	0	1	0	0	0	0	0	0	0	0	0	0	1	0	0	3	0	0	0	0	0	0	0	0	0	0	0
Vitamin E	D014810	Vitamin E	1406-18-4	DTXSID9051458	DTXSID9051458	14	0	1	1	0	3	0	0	0	0	0	0	1	0	4	0	0	0	0	0	0	0	0	0	0	0	0	0	0	2	0	0	0	0	0	0	0	0	0	0	0	1	0	0
Xylazine	D014991	Xylazine	23076-35-9	DTXSID6040248	DTXSID6040248	14	2	0	0	1	1	0	0	2	0	0	0	0	0	0	0	0	0	1	0	0	1	0	0	0	0	0	0	0	0	0	0	0	0	1	0	0	1	0	0	0	0	0	0
amitraz	C014983	amitraz	33089-61-1	DTXSID5023871	DTXSID5023871	13	0	1	0	0	0	0	0	5	0	0	0	3	0	0	0	0	0	0	0	0	0	0	0	0	0	0	0	0	0	0	0	0	0	0	0	1	0	0	0	0	0	0	0
Amodiaquine	D000655	Amodiaquine	69-44-3	DTXSID20219036	DTXSID20219036	13	0	1	0	0	1	4	0	0	0	1	0	0	1	0	0	0	0	0	0	0	0	0	0	0	0	0	0	0	0	0	0	0	2	0	0	0	0	0	0	0	0	0	1
Amyl Nitrite	D000680	Amyl Nitrite	8017-89-8	DTXSID4022606	DTXSID4022606	13	1	0	0	0	0	0	0	1	0	0	0	0	0	0	0	0	0	1	0	0	0	0	1	0	0	0	0	0	0	3	0	0	0	1	0	0	0	0	0	0	0	0	0
artemisinine	C031327	artemisinine	63968-64-9	DTXSID2040652	DTXSID2040652	13	0	1	0	3	0	0	0	0	0	2	0	2	0	0	0	0	0	1	0	1	0	0	0	0	0	0	0	0	0	0	0	0	0	0	0	0	0	0	0	0	0	0	0
Beclomethasone	D001507	Beclomethasone	5534-09-8	DTXSID3048730	DTXSID3048730	13	0	0	0	1	2	0	0	0	0	0	0	0	0	0	0	0	0	0	0	0	0	0	0	0	0	0	0	0	0	0	0	0	0	0	0	0	0	0	0	0	0	0	0
Calcium Hydroxide	D002126	Calcium Hydroxide	1305-62-0	DTXSID7034410	DTXSID7034410	13	1	0	0	0	0	0	0	0	0	0	0	0	0	0	1	0	0	0	0	0	0	0	0	0	0	0	0	0	0	1	0	0	0	0	0	0	0	0	0	0	0	0	0
Chlordan	D002706	Chlordan	57-74-9	DTXSID7020267	DTXSID7020267	13	6	1	1	0	0	0	0	0	0	1	0	0	0	0	0	0	0	0	0	0	0	0	0	0	0	1	0	0	0	0	0	0	0	0	0	0	0	0	0	0	0	0	0
Chlorprothixene	D002749	Chlorprothixene	113-59-7	DTXSID4022810	DTXSID4022810	13	1	0	1	0	0	1	0	1	1	0	0	2	0	0	0	0	0	0	0	0	0	0	0	0	0	0	0	0	0	0	0	1	0	0	0	0	1	0	0	0	0	0	0
Clofibric Acid	D002995	Clofibric Acid	882-09-7	DTXSID1040661	DTXSID1040661	13	0	0	0	0	9	0	0	0	0	0	0	0	0	0	0	0	0	0	0	0	0	0	0	0	0	0	0	0	0	0	0	0	0	1	0	0	0	0	0	0	0	0	0
Emetine	D004640	Emetine	483-18-1	DTXSID5022980	DTXSID5022980	13	0	0	0	0	7	0	0	0	1	0	0	0	0	0	0	0	0	0	0	0	0	0	0	0	0	0	0	0	0	0	0	0	1	0	0	0	0	0	0	0	0	0	3
ethylene dichloride	C024565	ethylene dichloride	107-06-2	DTXSID6020438	DTXSID6020438	13	1	0	0	4	0	0	0	0	0	0	0	1	0	0	0	0	0	0	0	0	0	0	0	0	0	0	0	0	0	0	0	0	0	0	0	5	0	0	0	0	0	0	0
Fenofibrate	D011345	Fenofibrate	49562-28-9	DTXSID2029874	DTXSID2029874	13	0	1	0	0	9	0	0	0	0	0	0	0	0	0	0	0	0	0	0	0	0	0	0	0	0	0	0	0	0	0	0	0	0	0	0	0	0	0	0	0	0	0	0
Fenthion	D005284	Fenthion	55-38-9	DTXSID8020620	DTXSID8020620	13	0	3	1	1	1	0	0	0	0	1	0	0	0	0	0	1	0	0	0	0	2	0	0	0	0	0	0	0	0	0	0	0	0	0	0	0	0	0	0	0	0	0	1
fenvalerate	C017690	fenvalerate	66267-77-4	DTXSID3058450	DTXSID3058450	13	2	0	1	0	0	0	0	0	0	1	0	0	0	0	6	0	0	0	0	0	1	0	0	0	0	0	0	0	0	0	0	0	0	0	0	0	0	0	0	0	0	0	0
Fluconazole	D015725	Fluconazole	86386-73-4	DTXSID3020627	DTXSID3020627	13	2	0	0	0	0	0	0	1	0	1	0	0	2	0	1	0	0	0	0	0	0	0	0	0	0	0	0	0	0	0	0	0	0	2	1	0	0	0	0	0	0	0	0
fluvastatin	C065180	fluvastatin	93957-55-2	DTXSID3044758	DTXSID3044758	13	1	0	0	0	7	0	0	0	0	0	0	0	0	0	0	0	0	0	0	0	0	0	0	0	0	0	0	0	0	0	0	0	0	0	0	0	0	0	0	0	0	0	0
Foscarnet	D017245	Foscarnet	4428-95-9	DTXSID0048478	DTXSID0048478	13	4	0	0	0	0	0	0	0	0	0	0	0	0	0	1	1	0	0	0	0	0	0	0	0	0	1	0	0	0	0	0	1	0	0	0	0	0	0	0	0	0	0	0
Loratadine	D017336	Loratadine	79794-75-5	DTXSID2023224	DTXSID2023224	13	0	0	0	0	0	0	0	0	0	1	1	1	0	0	0	0	0	2	1	0	0	0	0	3	0	1	1	0	0	0	0	0	0	0	0	0	0	0	0	0	0	0	0
manganese chloride	C025340	manganese chloride	7773-01-5	DTXSID9040681	DTXSID9040681	13	0	0	0	0	0	0	5	0	0	0	0	0	0	0	0	0	0	1	0	0	0	0	0	0	0	0	0	0	0	0	0	0	0	0	0	2	0	2	0	0	0	0	0
Medroxyprogesterone	D008525	Medroxyprogesterone	520-85-4	DTXSID0036508	DTXSID0036508	13	0	0	0	0	0	0	0	0	0	1	0	0	0	0	0	0	0	0	0	0	0	0	0	0	0	0	0	0	0	0	0	0	0	0	0	0	0	0	0	0	0	0	0
Mefenamic Acid	D008528	Mefenamic Acid	61-68-7	DTXSID5023243	DTXSID5023243	13	6	0	0	0	0	1	0	1	0	0	0	0	0	0	0	0	0	0	1	0	0	1	0	0	0	2	0	0	0	0	0	0	0	0	0	0	0	0	0	0	0	0	0
Mesna	D015080	Mesna	3375-50-6	DTXSID8023264	DTXSID8023264	13	1	0	0	10	0	0	0	0	0	0	0	0	0	0	0	0	0	0	1	0	0	0	0	0	0	1	0	0	0	0	0	0	0	0	0	0	0	0	0	0	0	0	0
Naphazoline	D009278	Naphazoline	550-99-2	DTXSID7045788	DTXSID7045788	13	0	0	0	0	0	0	0	1	0	0	0	1	0	1	0	0	0	0	0	0	0	0	0	1	0	0	0	0	3	0	0	0	0	0	0	0	0	0	0	0	0	0	0
Norethynodrel	D009641	Norethynodrel	68-23-5	DTXSID3021069	DTXSID3021069	13	0	0	0	0	0	0	0	0	1	0	0	0	0	0	1	0	0	0	1	0	0	0	0	0	0	0	0	0	0	0	0	1	0	0	0	0	0	0	0	0	0	0	0
pamidronate	C019248	pamidronate	40391-99-9	DTXSID4023414	DTXSID4023414	13	0	0	0	0	1	0	0	1	1	0	0	0	0	0	0	0	0	0	0	0	0	0	0	0	0	0	0	1	0	0	0	0	0	0	0	0	0	0	0	0	0	0	0
Phentermine	D010645	Phentermine	122-09-8	DTXSID9023461	DTXSID9023461	13	0	0	0	0	0	0	0	0	0	0	1	0	1	1	0	0	0	0	0	0	0	0	0	0	0	0	0	0	0	0	0	0	0	0	0	0	0	0	0	0	0	0	0
Phenylmethylsulfonyl Fluoride	D010664	Phenylmethylsulfonyl Fluoride	329-98-6	DTXSID6059819	DTXSID6059819	13	0	5	3	1	0	0	0	0	0	0	0	0	0	0	0	0	0	3	0	0	0	0	0	0	0	0	0	0	0	0	0	0	0	0	0	0	0	0	0	0	0	0	0
Pseudoephedrine	D054199	Pseudoephedrine	90-82-4	DTXSID0023537	DTXSID0023537	13	1	0	0	0	0	0	0	0	6	1	0	0	0	0	0	0	2	0	0	0	0	0	0	0	0	0	0	0	1	0	0	0	0	0	0	0	0	0	0	0	0	0	0
rosiglitazone	C089730	rosiglitazone	155141-29-0	DTXSID2023569	DTXSID2023569	13	0	0	0	0	2	0	0	0	0	0	0	0	0	0	0	0	0	0	0	0	0	0	0	0	0	0	0	0	7	0	0	0	0	0	0	0	0	0	0	0	0	0	0
sertindole	C066304	sertindole	106516-24-9	DTXSID6048967	DTXSID6048967	13	1	1	0	1	0	5	0	0	0	0	0	0	0	0	0	1	0	0	0	0	0	0	1	0	0	0	0	0	0	0	0	0	0	1	0	0	0	0	0	0	0	0	0
Silicon Dioxide	D012822	Silicon Dioxide	14464-46-1	DTXSID5041801	DTXSID5041801	13	0	0	0	0	0	0	0	1	0	0	0	0	0	0	0	0	0	0	0	0	0	0	0	0	0	0	0	0	0	0	0	0	0	0	0	1	0	1	0	0	0	0	0
Sotalol	D013015	Sotalol	3930-20-9	DTXSID0023589	DTXSID0023589	13	0	0	0	0	2	0	0	0	1	0	0	0	0	0	0	0	0	0	1	0	0	0	0	0	0	0	0	0	0	0	0	0	0	4	0	0	0	0	0	0	0	0	0
Thiothixene	D013888	Thiothixene	5591-45-7	DTXSID6023658	DTXSID6023658	13	0	0	0	0	0	4	2	0	0	0	0	0	0	0	0	2	0	0	0	0	0	0	0	1	0	0	0	0	0	0	0	0	1	0	0	0	0	0	0	0	0	0	0
triphenyl phosphite	C013318	triphenyl phosphite	101-02-0	DTXSID0026252	DTXSID0026252	13	0	8	0	0	0	0	0	0	0	1	0	2	0	0	0	0	0	2	0	0	0	0	0	0	0	0	0	0	0	0	0	0	0	0	0	0	0	0	0	0	0	0	0
veralipride	C027429	veralipride	66644-81-3	DTXSID6046268	DTXSID6046268	13	0	0	0	0	0	2	4	0	0	0	0	0	0	0	0	1	0	0	0	0	0	0	0	0	0	0	0	0	0	0	0	0	0	0	0	0	0	3	0	0	0	0	0
zoledronic acid	C088658	zoledronic acid	118072-93-8	DTXSID0042668	DTXSID0042668	13	1	0	0	0	0	0	0	0	0	0	0	0	0	0	0	0	0	0	0	0	0	0	0	0	0	0	0	0	0	0	0	0	0	0	0	0	0	0	0	0	0	0	0
Acrolein	D000171	Acrolein	107-02-8	DTXSID5020023	DTXSID5020023	12	0	1	0	0	0	0	0	0	0	0	0	0	0	0	0	0	0	0	0	0	0	0	0	0	1	0	0	0	0	0	0	0	0	0	0	0	0	0	0	0	0	0	0
Arachidonic Acid	D016718	Arachidonic Acid	506-32-1	DTXSID4040420	DTXSID4040420	12	0	0	0	0	0	0	0	0	0	0	0	0	0	0	0	0	0	0	0	0	0	0	0	0	0	0	0	0	0	0	0	0	0	0	0	3	0	0	0	0	0	0	0
artemether	C032942	artemether	71963-77-4	DTXSID7040651	DTXSID7040651	12	0	3	0	2	0	0	0	0	0	1	0	2	0	0	0	0	0	0	0	2	0	0	0	0	0	0	0	0	0	0	1	0	0	0	0	0	0	0	0	0	0	0	0
Barbital	D001462	Barbital	57-44-3	DTXSID5022643	DTXSID5022643	12	9	0	0	0	0	0	0	0	0	0	0	0	0	0	0	0	0	0	0	0	0	0	0	0	0	0	0	0	0	0	0	0	0	0	0	0	0	0	0	0	0	0	0
butalbital	C004470	butalbital	77-26-9	DTXSID6022711	DTXSID6022711	12	1	0	0	0	0	0	0	0	1	0	0	0	1	0	0	0	0	1	1	0	0	0	0	0	0	0	0	0	0	0	0	0	0	0	0	0	0	0	0	0	0	0	0
Cadmium Chloride	D019256	Cadmium Chloride	10108-64-2	DTXSID6020226	DTXSID6020226	12	0	2	0	0	0	0	0	0	0	0	1	0	0	0	0	0	0	0	0	0	0	0	0	0	0	0	0	0	0	0	0	0	0	0	0	0	0	0	0	0	0	0	0
Cladribine	D017338	Cladribine	4291-63-8	DTXSID8022828	DTXSID8022828	12	1	0	2	0	0	0	0	0	0	0	0	0	0	0	0	0	0	0	0	0	0	0	0	0	0	0	0	0	0	1	0	0	0	0	0	0	0	0	0	0	0	0	0
Clenbuterol	D002976	Clenbuterol	37148-27-9	DTXSID7022833	DTXSID7022833	12	0	1	0	0	2	0	0	0	0	6	0	0	0	0	0	0	0	0	0	0	0	0	0	0	0	0	0	0	0	0	0	0	0	0	0	0	0	0	0	0	0	0	1
closantel	C023342	closantel	57808-65-8	DTXSID6040662	DTXSID6040662	12	0	0	0	0	0	0	0	0	0	0	0	0	0	0	0	0	0	0	0	0	0	0	0	0	0	0	0	0	0	5	0	0	0	0	0	0	0	0	0	1	0	0	0
diethylene glycol	C013484	diethylene glycol	111-46-6	DTXSID8020462	DTXSID8020462	12	0	3	1	0	0	0	0	0	0	0	0	0	0	0	0	0	0	0	0	0	1	0	0	0	0	0	0	0	0	0	0	0	0	0	0	0	0	0	0	0	0	0	0
Dimethyl Fumarate	D000069462	Dimethyl Fumarate	624-49-7	DTXSID4060787	DTXSID4060787	12	0	0	0	0	0	0	0	0	0	0	0	0	0	0	0	0	0	0	0	0	0	0	0	0	0	0	0	0	0	1	0	0	0	0	0	0	0	0	0	0	0	0	0
Dobutamine	D004280	Dobutamine	61661-06-1	DTXSID90210671	DTXSID90210671	12	1	0	0	2	0	0	0	0	0	1	0	0	0	0	1	0	3	0	0	0	0	0	0	0	0	0	0	0	0	0	0	0	0	1	0	0	0	0	0	0	0	0	0
Erlotinib Hydrochloride	D000069347	Erlotinib Hydrochloride	183319-69-9	DTXSID10171412	DTXSID10171412	12	1	0	0	0	0	0	0	0	0	0	0	1	0	0	0	0	0	0	0	0	0	1	0	0	0	0	0	0	1	0	1	0	0	0	0	0	0	0	0	0	0	0	0
ethylcholine aziridinium	C044894	ethylcholine aziridinium	63918-38-7	DTXSID20213695	DTXSID20213695	12	0	1	0	0	0	0	0	0	0	0	3	0	0	0	0	0	0	0	0	0	0	0	0	0	0	0	0	0	0	0	0	0	0	0	0	0	0	0	0	0	0	1	0
Fenoterol	D005280	Fenoterol	1944-12-3	DTXSID5045419	DTXSID5045419	12	0	0	0	0	1	0	0	0	0	10	0	1	0	0	0	0	0	0	0	0	0	0	0	0	0	0	0	0	0	0	0	0	0	0	0	0	0	0	0	0	0	0	0
fludarabine phosphate	C042382	fludarabine phosphate	75607-67-9	DTXSID2023060	DTXSID2023060	12	0	2	0	3	0	0	0	1	0	0	0	2	0	0	0	0	0	0	0	0	0	0	0	0	0	0	0	0	0	2	0	0	0	0	0	0	0	0	0	0	0	0	0
Fluspirilene	D005484	Fluspirilene	1841-19-6	DTXSID7045152	DTXSID7045152	12	0	0	0	0	1	2	3	0	0	1	0	0	0	0	0	3	0	0	0	0	0	0	0	1	0	0	0	0	0	0	0	0	0	0	0	0	0	0	0	0	0	0	0
Fluticasone	D000068298	Fluticasone	90566-53-3	DTXSID0044022	DTXSID0044022	12	1	0	0	0	0	0	0	0	0	0	0	0	0	0	0	0	0	0	0	0	0	0	0	1	0	0	0	0	1	0	0	0	0	0	0	0	0	0	0	0	0	0	0
Gallic Acid	D005707	Gallic Acid	149-91-7	DTXSID0020650	DTXSID0020650	12	0	0	0	3	0	0	1	0	1	1	1	0	0	1	0	0	1	0	0	0	0	0	0	0	0	0	0	0	0	0	0	0	1	0	0	0	0	0	0	0	0	0	0
Guanfacine	D016316	Guanfacine	29110-47-2	DTXSID9046944	DTXSID9046944	12	1	0	0	0	0	0	0	0	3	0	0	0	1	0	0	0	0	0	0	0	0	0	0	0	0	2	0	0	0	0	0	0	0	0	0	0	1	0	0	0	0	0	0
Hydrofluoric Acid	D006858	Hydrofluoric Acid	7664-39-3	DTXSID1049641	DTXSID1049641	12	0	0	0	0	0	0	0	0	0	0	0	0	0	0	0	0	0	0	0	0	0	0	0	0	0	0	0	0	0	0	0	0	0	0	0	0	0	0	0	0	0	0	0
ioversol	C054871	ioversol	87771-40-2	DTXSID2045521	DTXSID2045521	12	1	3	0	0	0	0	0	0	0	1	0	0	0	0	0	0	0	0	0	0	0	0	0	0	0	0	0	0	0	2	0	0	0	0	0	1	0	0	0	0	0	0	0
Ketoconazole	D007654	Ketoconazole	65277-42-1	DTXSID7029879	DTXSID7029879	12	2	0	0	1	0	0	0	0	2	0	0	0	0	0	0	0	0	0	0	0	1	1	0	0	0	0	0	0	0	0	0	0	0	0	0	0	0	0	0	0	0	0	0
Ketoprofen	D007660	Ketoprofen	22071-15-4	DTXSID6020771	DTXSID6020771	12	0	0	0	0	0	0	0	2	0	0	0	1	1	1	0	1	0	1	0	0	0	0	0	0	0	1	0	0	0	0	0	0	0	0	1	0	0	0	0	0	0	0	0
Lisuride	D008090	Lisuride	140387-89-9	DTXSID30274075	DTXSID30274075	12	0	0	0	0	0	0	0	0	3	1	0	0	0	1	0	0	0	0	0	0	0	0	0	1	0	0	1	0	0	0	0	0	1	0	0	0	0	0	0	0	0	0	0
Losartan	D019808	Losartan	124750-99-8	DTXSID3044209	DTXSID3044209	12	0	0	0	0	2	0	0	0	0	0	1	0	0	0	0	0	0	0	0	0	0	0	0	0	0	0	0	0	0	0	0	0	0	1	0	0	1	0	0	0	0	0	0
Methylergonovine	D008755	Methylergonovine	113-42-8	DTXSID1023283	DTXSID1023283	12	0	0	0	1	0	0	0	0	0	0	0	0	0	0	0	0	1	0	1	0	0	0	1	0	0	0	0	0	0	0	0	0	0	0	0	0	0	0	0	0	0	0	0
Midodrine	D008879	Midodrine	3092-17-9	DTXSID1047493	DTXSID1047493	12	0	0	0	0	0	0	0	0	0	0	0	0	0	1	3	2	0	0	0	0	0	0	0	0	0	0	0	0	0	0	0	0	0	0	0	0	2	0	0	0	0	0	0
Neostigmine	D009388	Neostigmine	51-60-5	DTXSID40199003	DTXSID40199003	12	0	0	0	0	3	0	0	0	0	1	0	0	0	0	0	0	0	0	0	0	1	0	0	0	0	0	0	0	0	0	0	0	0	0	0	0	0	0	0	0	0	0	1
Nickel	D009532	Nickel	7440-02-0	DTXSID2020925	DTXSID2020925	12	1	1	1	0	3	0	0	0	0	0	0	0	0	0	0	0	0	0	1	0	0	0	0	0	0	0	0	0	0	0	0	0	0	0	0	1	0	0	0	0	0	0	0
Pentetic Acid	D004369	Pentetic Acid	67-43-6	DTXSID2023434	DTXSID2023434	12	3	0	0	0	0	0	0	0	0	0	0	2	0	0	2	0	0	0	0	0	0	0	0	0	0	0	0	0	0	0	0	0	0	0	0	0	0	0	0	0	0	0	0
piperazine	C034930	piperazine	3597-26-0	DTXSID50189516	DTXSID50189516	12	3	1	0	1	0	0	0	0	0	0	0	0	0	0	0	0	3	0	0	0	0	1	0	0	0	0	0	0	0	0	0	0	0	0	0	0	0	0	0	0	0	0	0
Pregnanolone	D011280	Pregnanolone	128-20-1	DTXSID1046342	DTXSID1046342	12	6	0	0	0	0	0	0	0	0	0	2	0	0	0	0	0	0	0	0	0	0	0	0	0	0	1	0	0	0	0	0	0	0	0	0	0	0	0	0	0	0	0	0
sorafenib	C471405	sorafenib	284461-73-0	DTXSID7041128	DTXSID7041128	12	1	0	0	0	0	0	0	0	0	0	0	0	0	0	1	0	0	0	0	0	0	0	0	0	0	0	0	0	0	0	0	0	0	0	2	1	0	0	0	0	0	0	0
Sucrose	D013395	Sucrose	57-50-1	DTXSID2021288	DTXSID2021288	12	0	0	0	0	0	0	0	0	0	0	0	0	0	0	0	0	0	0	0	0	0	0	0	0	0	0	0	0	0	0	0	0	0	0	0	0	0	0	0	0	0	0	0
tetramethylenedisulfotetramine	C010349	tetramethylenedisulfotetramine	80-12-6	DTXSID8040307	DTXSID8040307	12	5	0	0	0	0	0	0	0	0	0	0	0	0	0	0	0	0	0	1	0	0	0	3	0	0	3	0	0	0	0	0	0	0	0	0	0	0	0	0	0	0	0	0
Tiapamil Hydrochloride	D013976	Tiapamil Hydrochloride	57010-31-8	DTXSID10205620	DTXSID10205620	12	0	0	0	0	0	2	3	0	0	0	0	0	0	0	0	1	0	0	1	0	0	0	0	0	0	0	0	0	0	0	0	0	0	0	0	0	0	1	0	0	0	0	0
Acetone	D000096	Acetone	67-64-1	DTXSID8021482	DTXSID8021482	11	2	1	0	0	0	0	0	2	0	1	0	0	0	0	0	0	0	0	0	0	0	0	0	0	0	0	0	0	0	0	0	0	0	0	0	1	0	0	0	0	0	0	0
Ajmaline	D000404	Ajmaline	4360-12-7	DTXSID6045537	DTXSID6045537	11	2	1	0	0	0	0	0	1	0	0	0	0	0	0	0	0	1	1	0	0	1	1	0	0	0	0	0	0	0	0	0	0	0	0	0	0	0	0	0	0	0	0	0
Albendazole	D015766	Albendazole	54965-21-8	DTXSID0022563	DTXSID0022563	11	2	0	0	1	0	0	0	0	0	0	0	0	0	0	0	2	0	0	0	0	0	0	0	0	0	0	0	0	0	0	0	0	0	0	0	1	1	0	0	0	0	0	0
Alendronate	D019386	Alendronate	66376-36-1	DTXSID5022568	DTXSID5022568	11	1	0	0	0	0	0	0	0	1	0	0	0	0	0	0	0	0	0	0	0	0	0	0	0	0	0	0	0	0	0	0	0	0	1	0	0	0	0	0	0	0	0	0
Bezafibrate	D001629	Bezafibrate	41859-67-0	DTXSID3029869	DTXSID3029869	11	0	0	1	0	4	0	0	0	0	0	0	0	0	0	1	0	0	0	0	0	0	0	0	0	0	0	0	0	0	0	0	0	0	0	0	0	0	0	0	0	0	0	1
bismuth subsalicylate	C015715	bismuth subsalicylate	14882-18-9	DTXSID6024622	DTXSID6024622	11	0	0	0	2	0	0	0	0	0	1	1	0	1	0	0	0	1	1	0	0	0	1	0	0	0	0	0	0	0	0	0	0	0	0	0	0	0	0	0	0	0	0	0
Carbachol	D002217	Carbachol	462-58-8	DTXSID0048397	DTXSID0048397	11	4	0	0	1	0	0	0	1	0	0	0	0	0	0	0	0	0	0	1	0	0	0	0	0	0	0	0	0	0	0	0	0	0	0	0	0	0	0	0	0	0	0	0
cathinone	C023665	cathinone	71031-15-7	DTXSID0050427	DTXSID0050427	11	2	1	0	0	0	0	0	0	1	0	0	0	3	0	0	0	0	0	0	0	0	0	0	0	0	0	0	0	0	0	0	0	0	0	0	0	0	0	0	0	0	0	0
Ceftriaxone	D002443	Ceftriaxone	73384-59-5	DTXSID0022773	DTXSID0022773	11	0	0	0	2	0	0	0	0	0	0	0	0	0	1	0	0	0	0	0	0	0	0	1	0	0	1	0	1	0	0	0	0	0	0	0	0	0	0	0	0	0	0	0
Chlorine	D002713	Chlorine	7782-50-5	DTXSID1020273	DTXSID1020273	11	1	0	0	1	0	0	0	0	0	0	1	1	0	0	0	0	0	0	0	0	0	0	0	0	0	0	0	0	0	0	0	0	0	1	0	0	0	0	0	0	0	0	0
Clorazepate Dipotassium	D003009	Clorazepate Dipotassium	(blank)	DTXSID20972578	DTXSID20972578	11	1	0	0	0	0	0	0	1	0	0	0	0	0	0	0	0	0	1	0	0	0	1	0	1	0	0	0	0	0	0	0	0	0	0	0	0	0	0	0	0	0	3	0
Dimenhydrinate	D004111	Dimenhydrinate	523-87-5	DTXSID9025087	DTXSID9025087	11	0	0	0	0	0	0	0	0	1	0	0	0	0	1	0	0	0	0	1	0	0	0	2	0	0	2	0	0	0	0	0	0	0	0	0	0	0	0	0	0	0	0	0
Ditiocarb	D004050	Ditiocarb	147-84-2	DTXSID3045017	DTXSID3045017	11	2	1	0	0	0	0	1	0	0	0	0	0	0	0	0	0	0	0	0	0	0	0	0	0	0	0	0	0	0	0	0	0	0	0	0	0	0	2	0	0	0	0	0
Endrin	D004732	Endrin	72-20-8	DTXSID6020561	DTXSID6020561	11	7	0	0	0	1	0	0	0	0	0	0	0	0	0	0	0	0	0	1	0	0	0	0	0	0	0	0	0	0	0	0	0	0	0	0	0	0	0	0	0	0	0	1
Enoxacin	D015365	Enoxacin	74011-58-8	DTXSID5022984	DTXSID5022984	11	9	0	0	1	0	0	0	0	0	0	0	0	0	0	0	0	0	0	0	0	0	0	0	0	0	0	0	0	0	0	0	0	0	0	0	0	0	0	0	0	0	0	0
enrofloxacin	C052904	enrofloxacin	93106-60-6	DTXSID1045619	DTXSID1045619	11	1	0	0	0	0	0	0	0	0	0	0	0	0	0	0	0	0	0	0	0	0	0	0	0	0	0	0	0	0	10	0	0	0	0	0	0	0	0	0	0	0	0	0
Etanidazole	D017341	Etanidazole	22668-01-5	DTXSID8045434	DTXSID8045434	11	0	3	8	0	0	0	0	0	0	0	0	0	0	0	0	0	0	0	0	0	0	0	0	0	0	0	0	0	0	0	0	0	0	0	0	0	0	0	0	0	0	0	0
Ethchlorvynol	D004984	Ethchlorvynol	113-18-8	DTXSID2023010	DTXSID2023010	11	0	1	0	0	0	0	0	4	1	0	0	0	0	0	0	0	0	0	0	0	0	0	0	0	0	0	0	0	0	0	0	0	0	0	0	0	0	0	0	0	0	0	0
Ethyl Chloride	D005018	Ethyl Chloride	75-00-3	DTXSID1020302	DTXSID1020302	11	0	1	0	0	0	0	0	0	3	1	0	0	0	0	0	0	0	3	0	0	0	1	0	0	0	0	0	0	0	0	0	0	0	0	0	0	0	0	0	0	0	0	0
Fluorine	D005461	Fluorine	7782-41-4	DTXSID3024106	DTXSID3024106	11	2	1	0	0	0	0	0	0	0	0	0	0	0	0	1	0	0	0	0	0	0	0	0	1	0	0	0	0	0	0	0	0	2	0	0	0	0	0	0	0	0	0	1
Helium	D006371	Helium	7440-59-7	DTXSID7036402	DTXSID7036402	11	2	0	0	1	0	0	0	0	0	5	0	0	0	0	0	0	0	0	0	0	0	0	0	0	0	0	0	0	0	0	0	0	0	0	0	0	0	0	0	0	0	0	0
Hydrogen Cyanide	D006856	Hydrogen Cyanide	3017-23-0	DTXSID80184251	DTXSID80184251	11	1	1	0	2	0	1	0	1	0	0	0	1	0	0	0	0	0	0	0	0	0	0	0	0	0	0	0	1	0	0	0	0	0	0	0	0	0	0	0	0	0	0	0
Methomyl	D008724	Methomyl	16752-77-5	DTXSID1022267	DTXSID1022267	11	3	0	1	0	0	0	0	0	0	0	0	0	0	0	0	0	0	0	0	0	0	0	1	0	0	1	0	0	0	0	0	0	0	0	0	0	0	0	0	0	0	0	0
mipafox	C005238	mipafox	371-86-8	DTXSID5042160	DTXSID5042160	11	0	5	1	0	0	0	0	0	0	0	0	0	0	0	0	0	0	2	0	0	0	0	0	0	0	0	0	0	0	0	0	0	1	0	0	0	0	0	0	0	0	0	0
Molindone	D008972	Molindone	7416-34-4	DTXSID9023332	DTXSID9023332	11	0	0	0	0	0	5	1	0	0	0	0	0	0	0	0	2	0	0	0	0	0	0	0	0	0	0	0	0	0	0	0	0	1	0	0	0	0	0	1	0	0	0	0
Norepinephrine	D009638	Norepinephrine	636-88-4	DTXSID80212982	DTXSID80212982	11	1	0	0	0	0	0	0	0	0	0	0	0	0	1	0	0	0	0	0	0	0	0	0	0	0	0	0	0	0	1	0	0	0	0	0	0	0	0	0	0	1	0	0
Poly I-C	D011070	Poly I-C	(blank)	DTXSID90947819	DTXSID90947819	11	1	2	0	1	0	0	0	0	0	0	1	0	0	0	0	0	0	0	0	0	0	0	1	0	0	0	0	0	0	0	0	0	0	0	0	0	0	1	0	0	0	0	0
Polymethyl Methacrylate	D019904	Polymethyl Methacrylate	9011-14-7	DTXSID1042152	DTXSID1042152	11	0	0	0	0	0	0	0	0	0	0	0	0	0	0	0	0	0	0	0	0	0	0	0	0	0	0	0	0	0	4	0	0	0	0	0	0	0	0	0	0	0	0	0
Potassium Permanganate	D011196	Potassium Permanganate	7722-64-7	DTXSID2034839	DTXSID2034839	11	0	0	0	1	0	1	2	0	0	0	0	0	0	0	0	0	0	0	0	0	0	0	0	0	0	0	0	0	0	0	0	1	0	0	0	0	0	2	0	0	0	0	0
Raltegravir Potassium	D000068898	Raltegravir Potassium	(blank)	DTXSID501007339	DTXSID501007339	11	0	0	0	0	1	0	0	0	0	0	0	0	0	0	0	0	0	0	0	0	0	0	0	0	0	0	3	0	0	0	0	0	0	0	0	0	0	0	0	0	0	0	0
rasagiline	C031967	rasagiline	136236-51-6	DTXSID3041112	DTXSID3041112	11	0	0	0	0	0	0	0	0	2	0	0	0	0	0	0	2	1	0	0	0	0	2	0	1	0	0	0	0	0	0	0	0	0	0	0	0	1	0	0	0	0	0	0
Ritodrine	D012312	Ritodrine	26652-09-5	DTXSID7048534	DTXSID7048534	11	0	0	0	0	0	0	0	0	0	3	0	1	0	1	0	0	0	0	0	0	0	0	0	0	0	0	0	0	0	0	0	0	0	0	0	0	0	0	0	0	0	0	0
sodium arsenate	C009277	sodium arsenate	13464-42-1	DTXSID0058306	DTXSID0058306	11	0	0	0	0	0	0	0	0	0	0	0	0	0	0	0	0	0	0	0	0	0	0	0	0	0	0	0	0	0	0	0	1	0	0	0	0	0	0	0	0	0	0	0
sodium arsenite	C017947	sodium arsenite	13768-07-5	DTXSID30160267	DTXSID30160267	11	0	0	1	0	0	0	0	1	0	0	0	0	0	0	0	0	0	0	0	0	0	0	0	0	0	0	0	0	0	0	0	0	0	0	0	0	0	0	0	0	0	0	0
Tetraethyl Lead	D013756	Tetraethyl Lead	78-00-2	DTXSID7023801	DTXSID7023801	11	1	2	0	3	0	0	0	0	0	0	1	0	0	0	0	0	0	0	0	0	0	0	0	0	0	0	0	0	0	0	0	0	0	0	0	1	0	0	0	0	0	0	0
Titanium	D014025	Titanium	7440-32-6	DTXSID3047764	DTXSID3047764	11	0	3	0	1	0	0	0	0	0	0	1	0	0	0	2	0	0	0	0	0	0	0	0	0	1	0	0	0	0	0	0	0	0	0	0	0	0	1	0	0	0	0	0
Tolterodine Tartrate	D000068737	Tolterodine Tartrate	(blank)	DTXSID80924972	DTXSID80924972	11	0	1	0	0	0	0	0	0	4	0	3	0	1	0	0	0	0	0	0	0	0	0	0	0	0	0	0	0	0	0	0	0	0	0	0	0	0	0	1	0	0	0	0
Trimeprazine	D014291	Trimeprazine	84-96-8	DTXSID9023708	DTXSID9023708	11	1	0	0	0	0	0	0	2	0	0	0	0	0	0	0	0	0	0	0	0	0	1	0	0	0	1	0	0	0	0	0	0	2	0	0	1	0	0	0	0	0	0	0
Viloxazine	D014745	Viloxazine	46817-91-8	DTXSID6057900	DTXSID6057900	11	3	0	0	1	0	0	0	0	0	0	0	0	0	0	0	0	0	0	0	0	0	0	1	0	0	1	0	0	0	0	0	0	0	0	0	0	0	0	1	0	0	0	0
1-pentyl-3-(1-naphthoyl)indole	C552597	1-pentyl-3-(1-naphthoyl)indole	209414-07-3	DTXSID10175117	DTXSID10175117	10	4	0	0	0	0	0	0	0	0	0	0	0	0	0	0	0	0	0	0	0	0	0	0	0	0	1	0	0	2	0	0	0	0	0	0	0	0	0	0	0	0	0	0
4-hydroxybutyric acid	C111420	4-hydroxybutyric acid	591-81-1	DTXSID2074740	DTXSID2074740	10	1	0	0	0	0	0	0	2	1	0	0	0	0	0	0	0	0	0	0	0	0	0	0	0	0	0	0	0	0	0	0	0	0	0	0	0	0	0	0	0	0	0	0
abacavir	C106538	abacavir	136470-78-5	DTXSID4046444	DTXSID4046444	10	0	1	0	0	0	0	0	0	1	0	0	0	0	0	0	0	0	0	0	0	0	0	0	2	0	0	0	0	1	0	0	0	0	0	0	0	0	0	0	0	0	0	0
Aprindine	D001073	Aprindine	33237-74-0	DTXSID5046726	DTXSID5046726	10	1	1	0	0	0	1	1	0	0	1	0	1	0	0	0	0	0	0	0	0	0	0	0	0	0	0	0	0	0	0	0	0	0	1	0	0	0	0	0	0	0	0	0
Asenapine	C522667	Asenapine	65576-45-6	DTXSID8049048	DTXSID8049048	10	0	0	0	0	0	2	0	0	0	0	0	0	0	0	0	2	0	0	0	0	0	0	0	0	0	0	1	0	0	0	0	0	0	0	0	0	0	1	0	0	0	0	0
Astemizole	D016589	Astemizole	68844-77-9	DTXSID9020110	DTXSID9020110	10	1	0	0	1	0	0	0	0	0	0	0	1	0	0	2	0	0	0	0	0	0	0	0	1	0	0	0	0	0	0	0	0	0	1	0	0	0	0	0	0	0	0	0
beta-thujone	C005790	beta-thujone	471-15-8	DTXSID7057575	DTXSID7057575	10	4	0	0	0	0	0	0	0	3	0	0	0	0	0	0	0	0	0	2	0	0	0	0	1	0	0	0	0	0	0	0	0	0	0	0	0	0	0	0	0	0	0	0
Bromazepam	D001960	Bromazepam	1812-30-2	DTXSID40171081	DTXSID40171081	10	0	0	0	0	0	0	1	4	0	0	0	1	1	0	0	1	0	0	0	0	0	0	0	0	0	0	0	0	0	0	0	0	0	0	0	0	0	0	0	0	0	0	0
butane	C046888	butane	106-97-8	DTXSID7024665	DTXSID7024665	10	0	0	0	1	0	0	0	1	0	0	0	0	0	0	0	0	1	0	0	0	0	0	0	0	0	0	0	0	0	0	0	0	0	0	0	0	0	0	0	0	0	0	0
Carbofuran	D002235	Carbofuran	1563-66-2	DTXSID9020249	DTXSID9020249	10	1	1	1	0	0	0	0	1	0	0	2	0	0	0	1	0	0	0	0	0	0	0	0	0	0	0	0	0	0	1	0	0	0	0	0	0	0	0	0	0	0	0	0
Cefotaxime	D002439	Cefotaxime	64485-93-4	DTXSID4046991	DTXSID4046991	10	3	0	0	2	1	0	0	0	0	0	0	0	0	1	0	0	0	0	0	0	0	1	1	0	0	0	0	0	0	0	0	0	0	0	0	0	0	0	0	0	0	0	0
Dantrolene	D003620	Dantrolene	14663-23-1	DTXSID4044585	DTXSID4044585	10	2	0	0	0	2	1	0	0	1	1	0	0	0	0	0	0	0	0	1	0	0	0	0	0	0	0	0	0	0	0	0	0	0	0	0	0	0	0	0	0	0	0	0
diethyltoluamide, ethanol, glycerin, terpineol, water drug combination	C032866	diethyltoluamide, ethanol, glycerin, terpineol, water drug combination	(blank)	DTXSID501009323	DTXSID501009323	10	3	1	0	2	0	0	0	0	0	1	0	0	0	0	0	0	1	1	0	0	0	0	0	0	0	0	0	0	0	0	0	0	1	0	0	0	0	0	0	0	0	0	0
Dimercaprol	D004112	Dimercaprol	59-52-9	DTXSID5040461	DTXSID5040461	10	1	1	0	0	0	0	0	0	0	0	0	0	0	0	0	0	2	0	0	0	0	0	0	0	0	1	0	0	0	0	0	0	0	0	0	0	0	0	0	0	0	0	0
Ethionamide	D005000	Ethionamide	536-33-4	DTXSID0020577	DTXSID0020577	10	1	1	0	1	0	0	0	1	0	0	0	0	0	0	0	0	0	0	0	0	1	0	0	0	0	0	0	0	0	0	0	0	0	0	0	0	0	0	1	0	0	0	0
fenbufen	C010725	fenbufen	36330-85-5	DTXSID9023043	DTXSID9023043	10	7	0	0	0	1	0	0	0	0	0	0	0	0	0	0	0	0	0	0	0	0	0	0	0	0	0	0	0	0	0	0	0	0	0	0	0	0	0	0	0	0	0	0
hydroquinone	C031927	hydroquinone	123-31-9	DTXSID7020716	DTXSID7020716	10	3	0	0	0	0	0	0	0	0	3	0	0	0	0	1	0	0	1	0	0	0	0	1	0	0	0	0	0	0	0	0	0	0	0	0	0	0	0	0	0	0	0	0
Indocyanine Green	D007208	Indocyanine Green	3599-32-4	DTXSID2023145	DTXSID2023145	10	0	0	0	0	0	0	0	0	0	0	0	0	0	0	0	0	0	0	0	0	0	0	0	0	0	0	0	0	0	0	0	0	0	1	0	0	0	0	0	0	0	0	0
malonic acid	C030290	malonic acid	926-71-6	DTXSID5061293	DTXSID5061293	10	0	0	0	2	0	0	0	0	0	0	0	0	0	0	0	0	0	0	0	0	0	0	0	0	0	0	0	0	0	0	0	0	0	0	0	0	0	0	0	0	0	0	0
metaldehyde	C002935	metaldehyde	37273-91-9	DTXSID80109343	DTXSID80109343	10	5	0	0	0	0	0	0	0	0	1	1	0	0	0	0	0	0	1	0	0	0	0	1	0	0	0	0	0	0	0	0	0	0	0	0	0	0	0	0	0	0	0	0
Methylmalonic Acid	D008764	Methylmalonic Acid	516-05-2	DTXSID00199549	DTXSID00199549	10	8	0	0	0	0	0	0	0	0	0	1	0	0	0	0	0	0	0	0	0	0	0	0	0	0	0	0	0	0	0	0	0	0	0	0	0	0	0	0	0	0	0	0
Mitomycin	D016685	Mitomycin	50-07-7	DTXSID2020898	DTXSID2020898	10	0	0	0	0	0	0	0	0	0	0	0	0	0	0	0	0	0	0	0	0	0	0	0	0	0	0	0	0	0	0	0	0	0	0	0	0	0	0	0	0	1	0	0
Muzolimine	D009156	Muzolimine	(blank)	DTXSID50866476	DTXSID50866476	10	0	1	2	0	0	0	0	0	0	0	0	1	0	0	0	0	0	0	0	0	0	0	0	0	0	0	0	0	0	0	0	0	0	0	0	0	0	0	0	0	0	0	2
Oxymetazoline	D010109	Oxymetazoline	2315-02-8	DTXSID80177729	DTXSID80177729	10	1	0	0	0	0	0	0	0	2	0	0	0	0	0	0	0	0	0	0	0	0	0	0	0	0	0	1	0	0	0	1	0	0	2	0	0	0	0	0	0	0	0	0
Pentoxifylline	D010431	Pentoxifylline	6493-05-6	DTXSID7023437	DTXSID7023437	10	0	1	0	0	0	0	1	0	2	2	0	1	0	0	0	0	0	0	0	0	0	0	0	0	0	0	0	0	0	0	0	0	1	0	0	0	0	1	0	0	0	0	0
Phenol	D019800	Phenol	108-95-2	DTXSID5021124	DTXSID5021124	10	0	0	0	0	0	1	0	0	0	0	0	0	0	0	1	0	0	0	0	0	0	0	0	0	0	0	0	0	0	1	0	0	0	0	0	0	0	0	0	0	0	0	1
Psilocybin	D011562	Psilocybin	520-52-5	DTXSID0048898	DTXSID0048898	10	0	0	0	0	0	0	0	0	7	0	0	0	1	0	0	0	0	0	0	0	0	0	0	0	0	0	0	0	0	0	0	0	0	0	0	0	0	0	0	0	0	0	0
pyriminil	C012598	pyriminil	53558-25-1	DTXSID1042360	DTXSID1042360	10	0	1	2	0	0	0	0	0	0	0	0	0	0	0	0	0	0	0	0	0	0	0	0	0	0	0	0	0	0	0	0	0	0	0	0	0	4	0	0	0	0	0	0
reboxetine	C074679	reboxetine	71620-89-8	DTXSID1048257	DTXSID1048257	10	0	0	0	0	0	0	0	0	0	0	0	0	0	0	0	0	0	0	0	0	0	0	0	2	0	0	4	0	0	0	0	0	0	0	0	0	0	0	2	0	0	0	0
Sodium Bicarbonate	D017693	Sodium Bicarbonate	144-55-8	DTXSID9021269	DTXSID9021269	10	0	0	1	1	0	0	0	0	0	0	0	0	0	2	1	0	2	0	0	0	0	0	0	0	0	0	0	0	0	0	0	0	0	0	0	0	0	0	0	0	0	0	0
tabun	C009374	tabun	77-81-6	DTXSID80861631	DTXSID80861631	10	4	3	1	0	0	0	0	0	0	1	0	0	0	0	0	0	0	0	0	0	0	0	0	0	0	0	0	0	0	0	0	0	0	0	0	0	0	0	0	0	0	0	0
temozolomide	C047246	temozolomide	85622-93-1	DTXSID5043714	DTXSID5043714	10	0	2	0	0	0	0	0	0	0	0	0	0	0	0	1	0	0	0	1	0	0	0	0	0	0	0	0	0	0	0	0	0	0	0	1	0	0	0	0	0	0	0	0
Tocainide	D016677	Tocainide	41708-72-9	DTXSID9040766	DTXSID9040766	10	4	1	0	1	0	0	0	0	0	0	0	2	0	0	0	0	0	0	0	0	0	1	0	0	0	0	0	0	0	0	0	0	0	1	0	0	0	0	0	0	0	0	0
Tolmetin	D014046	Tolmetin	26171-23-3	DTXSID2043951	DTXSID2043951	10	1	2	0	0	0	0	0	0	0	0	0	0	0	0	0	0	0	1	0	0	0	0	0	0	0	0	0	0	0	0	2	0	0	0	0	0	0	0	0	0	0	0	0
triethyllead	C010360	triethyllead	5224-23-7	DTXSID20200282	DTXSID20200282	10	0	2	0	3	0	0	0	0	0	1	0	1	0	0	0	0	0	0	0	0	0	0	0	0	0	0	0	0	0	0	0	0	0	0	0	1	0	0	0	0	0	0	0
Vitamin B 12	D014805	Vitamin B 12	68-19-9	DTXSID7044346	DTXSID7044346	10	0	1	0	0	0	0	0	1	0	1	0	0	0	0	0	0	1	0	0	0	1	0	0	0	0	0	0	0	0	0	0	1	0	0	1	0	0	0	0	1	0	0	0
Vitamin D	D014807	Vitamin D	1406-16-2	DTXSID1026295	DTXSID1026295	10	1	0	0	1	1	0	0	0	0	0	0	1	0	0	0	0	0	0	0	0	0	0	0	0	0	0	0	0	1	0	0	0	0	0	0	0	0	0	0	0	0	0	0
Zimeldine	D015031	Zimeldine	56775-88-3	DTXSID6048462	DTXSID6048462	10	0	1	1	0	1	1	0	0	0	0	0	0	0	0	0	0	0	0	0	0	0	0	0	1	0	1	1	0	0	0	0	0	0	0	0	0	0	0	0	0	0	0	0
zotepine	C022172	zotepine	26615-21-4	DTXSID9023756	DTXSID9023756	10	2	0	0	0	1	3	0	0	1	0	0	0	1	0	0	0	0	0	0	0	0	0	0	1	0	0	0	0	0	0	0	0	0	0	0	0	0	0	0	0	0	0	0
2,4,5-Trichlorophenoxyacetic Acid	D015085	2,4,5-Trichlorophenoxyacetic Acid	93-76-5	DTXSID5021388	DTXSID5021388	9	0	2	2	0	0	0	0	0	0	0	0	0	0	0	0	0	0	0	0	0	0	0	0	0	0	0	0	0	0	0	0	0	0	0	0	0	0	0	0	0	0	0	1
2,4-dithiobiuret	C007540	2,4-dithiobiuret	541-53-7	DTXSID2034968	DTXSID2034968	9	0	1	0	0	0	0	0	0	0	0	0	0	0	0	0	0	0	0	0	0	3	0	0	0	0	0	0	0	0	0	0	0	0	0	0	0	0	0	0	0	0	0	4
2-chloropropionic acid	C021974	2-chloropropionic acid	598-78-7	DTXSID0021545	DTXSID0021545	9	0	1	0	0	0	0	0	0	0	0	0	0	0	0	0	0	0	0	0	0	0	0	0	0	0	0	0	0	0	0	0	0	0	0	0	3	0	0	0	0	0	0	0
2-Propanol	D019840	2-Propanol	67-63-0	DTXSID7020762	DTXSID7020762	9	0	1	1	0	0	0	0	1	0	0	0	0	0	0	0	0	0	0	0	0	0	1	0	0	0	0	0	0	0	0	0	0	0	1	0	0	0	0	0	0	0	0	0
3-dinitrobenzene	C017906	3-dinitrobenzene	99-65-0	DTXSID9024065	DTXSID9024065	9	0	2	0	3	0	0	0	0	0	2	0	0	0	0	0	0	0	2	0	0	0	0	0	0	0	0	0	0	0	0	0	0	0	0	0	0	0	0	0	0	0	0	0
5,7-Dihydroxytryptamine	D015116	5,7-Dihydroxytryptamine	31363-74-3	DTXSID00185285	DTXSID00185285	9	1	1	0	1	0	0	0	0	0	0	0	0	0	0	0	0	0	1	1	0	0	0	1	0	0	0	0	0	0	0	0	0	0	0	0	0	0	0	0	0	0	0	0
Aconitine	D000157	Aconitine	302-27-2	DTXSID4046319	DTXSID4046319	9	1	0	1	0	0	0	0	0	0	0	0	0	0	0	0	0	0	0	0	0	0	0	0	0	1	0	0	0	0	0	0	0	0	0	0	0	0	0	0	0	0	0	0
aluminum phosphide	C001864	aluminum phosphide	20859-73-8	DTXSID1023867	DTXSID1023867	9	0	0	1	0	0	1	0	0	0	0	0	0	0	1	0	0	0	0	0	0	0	0	0	0	0	0	0	0	1	0	0	0	0	0	1	0	0	0	0	0	0	0	1
aniline	C023650	aniline	18960-62-8	DTXSID80584015	DTXSID80584015	9	0	1	1	0	3	0	0	0	0	0	0	0	0	0	0	0	0	0	0	0	0	0	0	0	0	0	0	0	0	0	0	0	0	0	0	0	0	0	0	0	0	0	0
Antipyrine	D000983	Antipyrine	60-80-0	DTXSID6021117	DTXSID6021117	9	0	1	0	0	0	0	0	0	0	0	0	0	0	3	0	0	0	0	0	0	0	0	0	0	0	0	0	0	0	0	0	0	0	0	0	0	0	0	0	0	0	0	0
artemotil	C055141	artemotil	82534-75-6	DTXSID50231827	DTXSID50231827	9	0	3	0	4	0	0	0	0	0	0	0	2	0	0	0	0	0	0	0	0	0	0	0	0	0	0	0	0	0	0	0	0	0	0	0	0	0	0	0	0	0	0	0
Aurothioglucose	D006051	Aurothioglucose	12192-57-3	DTXSID5046013	DTXSID5046013	9	2	0	2	1	1	0	0	0	0	0	0	0	0	0	0	0	0	0	0	0	0	0	0	0	0	0	0	0	0	1	0	0	0	0	0	0	0	0	0	0	0	0	0
Azacitidine	D001374	Azacitidine	320-67-2	DTXSID9020116	DTXSID9020116	9	0	0	0	1	2	0	0	0	0	0	0	0	0	0	0	0	0	0	0	1	0	0	0	0	0	0	0	0	0	0	0	0	0	0	1	0	0	0	0	0	0	0	1
barium carbonate	C006685	barium carbonate	513-77-9	DTXSID1029623	DTXSID1029623	9	0	0	0	0	0	0	0	0	0	0	0	0	0	0	0	0	0	0	0	0	4	0	0	0	0	0	0	0	0	0	0	0	0	0	0	0	0	0	0	0	0	0	0
bromperidol	C006820	bromperidol	10457-90-6	DTXSID0022690	DTXSID0022690	9	0	0	0	0	0	2	1	0	0	2	0	0	0	0	0	2	0	0	0	0	0	0	0	0	0	0	0	0	0	0	0	0	0	0	0	0	0	0	0	0	0	0	0
Cannabidiol	D002185	Cannabidiol	(blank)	DTXSID00871959	DTXSID00871959	9	1	0	0	0	0	0	0	0	0	0	3	0	0	0	0	1	0	0	0	0	0	0	0	0	0	0	0	0	0	0	0	0	0	0	0	1	0	0	0	0	0	0	0
carbamazepine epoxide	C012227	carbamazepine epoxide	36507-30-9	DTXSID60891456	DTXSID60891456	9	0	1	0	0	0	0	0	1	0	0	0	0	0	0	0	0	1	1	0	0	0	0	0	0	0	0	0	0	0	0	0	0	0	0	0	0	0	0	0	0	0	0	0
Carisoprodol	D002328	Carisoprodol	78-44-4	DTXSID8024733	DTXSID8024733	9	0	0	0	0	0	0	0	2	1	0	0	0	0	0	0	0	1	0	0	0	0	0	0	0	0	0	1	0	0	0	0	0	0	0	0	0	0	0	0	0	0	1	0
Cephalothin	D002512	Cephalothin	153-61-7	DTXSID4022783	DTXSID4022783	9	1	1	0	0	0	0	0	0	0	1	0	0	1	0	0	0	0	0	0	0	0	0	0	0	0	0	0	0	0	0	0	0	0	0	0	0	0	0	0	0	0	0	0
Cesium	D002586	Cesium	7440-46-2	DTXSID5036767	DTXSID5036767	9	2	0	0	0	0	0	0	0	0	0	0	0	0	0	0	0	1	0	0	0	0	0	0	0	0	0	0	0	0	0	0	0	0	5	0	0	0	0	0	0	0	0	0
Chloroform	D002725	Chloroform	67-66-3	DTXSID1020306	DTXSID1020306	9	0	0	0	0	0	0	0	2	0	0	0	0	0	0	0	0	0	0	0	0	0	0	0	0	0	0	0	0	0	0	0	0	0	0	2	0	0	0	0	1	0	0	0
Chlorothiazide	D002740	Chlorothiazide	58-94-6	DTXSID0022800	DTXSID0022800	9	0	0	0	1	0	0	0	1	0	1	0	0	0	0	0	0	0	0	0	0	1	0	0	0	0	0	0	0	0	0	0	0	0	0	1	0	0	0	1	0	0	0	0
cilostazol	C045645	cilostazol	73963-72-1	DTXSID9045132	DTXSID9045132	9	0	0	0	0	0	0	0	0	0	0	0	0	0	2	0	0	0	0	0	0	0	0	0	0	0	0	0	0	2	0	0	0	0	0	0	0	0	0	0	0	2	0	0
Citric Acid	D019343	Citric Acid	77-92-9	DTXSID3020332	DTXSID3020332	9	2	1	0	2	0	0	0	1	0	0	0	0	0	0	1	0	0	0	0	0	0	0	0	0	0	0	0	0	0	0	0	0	0	0	0	0	0	0	0	0	0	0	1
clobazam	C012255	clobazam	22316-47-8	DTXSID2046759	DTXSID2046759	9	0	0	0	0	0	0	0	1	0	0	0	0	0	0	0	0	0	1	1	0	0	0	0	2	0	0	0	0	0	0	0	0	0	0	0	0	0	0	0	0	0	0	0
cobaltous chloride	C018021	cobaltous chloride	7646-79-9	DTXSID9040180	DTXSID9040180	9	1	0	0	0	0	0	0	0	0	0	0	0	0	0	0	0	0	0	1	1	0	0	0	0	0	0	0	0	0	0	0	0	0	0	0	1	0	0	0	0	0	0	0
dapoxetine	C080598	dapoxetine	119356-77-3	DTXSID0057627	DTXSID0057627	9	0	1	0	0	0	0	0	0	0	0	0	0	0	0	0	0	0	0	0	0	0	0	0	0	0	0	0	0	0	0	0	0	0	1	0	0	2	0	0	0	0	0	0
Desogestrel	D017135	Desogestrel	54024-22-5	DTXSID6022898	DTXSID6022898	9	0	0	1	0	0	0	0	0	0	0	0	0	0	1	0	0	0	0	0	0	0	0	0	0	0	0	0	0	2	0	0	0	0	0	0	0	0	0	0	0	0	0	0
dimethyl mercury	C073972	dimethyl mercury	593-74-8	DTXSID5047742	DTXSID5047742	9	0	1	0	1	0	0	0	0	0	0	1	0	0	0	0	0	0	0	0	0	0	0	0	0	0	0	0	0	0	0	1	0	0	0	0	0	0	0	0	0	0	0	0
Fenitrothion	D005278	Fenitrothion	122-14-5	DTXSID4032613	DTXSID4032613	9	0	2	0	1	0	0	0	0	0	1	0	2	0	0	0	0	0	1	0	0	0	0	0	0	0	0	0	0	0	0	0	0	0	0	0	0	0	0	0	0	0	0	0
fluoroacetic acid	C014815	fluoroacetic acid	63905-88-4	DTXSID60213553	DTXSID60213553	9	3	1	0	1	0	0	0	0	0	0	0	0	0	0	0	0	0	0	0	0	0	0	0	0	0	1	0	0	0	0	0	0	0	0	0	0	0	0	0	0	0	0	0
Fluprednisolone	D005477	Fluprednisolone	53-34-9	DTXSID5046067	DTXSID5046067	9	0	0	0	0	4	0	0	0	0	0	0	0	0	0	0	0	0	0	0	0	1	0	0	0	0	0	1	0	0	0	0	0	0	0	0	0	0	0	0	0	0	0	0
Glycyrrhetinic Acid	D006034	Glycyrrhetinic Acid	471-53-4	DTXSID9020669	DTXSID9020669	9	0	0	0	0	4	0	0	0	0	0	0	0	0	0	0	0	0	0	0	0	0	0	0	0	0	0	0	0	0	0	0	0	0	0	0	0	0	0	0	0	0	0	0
Guanine	D006147	Guanine	73-40-5	DTXSID9052476	DTXSID9052476	9	0	0	2	0	2	0	0	0	1	0	0	0	1	0	1	0	0	0	0	0	0	0	0	0	0	0	0	0	0	0	0	0	0	0	0	0	0	0	0	0	0	0	0
harman	C005010	harman	486-84-0	DTXSID80197568	DTXSID80197568	9	0	0	0	0	0	0	0	0	0	1	1	0	0	0	0	0	0	0	0	0	0	0	0	0	0	0	0	0	0	0	0	0	0	0	0	0	0	0	0	0	0	2	0
Hexachlorobenzene	D006581	Hexachlorobenzene	118-74-1	DTXSID2020682	DTXSID2020682	9	0	2	1	0	0	0	0	0	0	0	0	1	0	0	0	0	0	0	1	1	1	0	0	0	0	0	0	0	0	0	0	0	0	0	0	0	0	0	0	0	0	0	0
Indinavir	D019469	Indinavir	150378-17-9	DTXSID4043802	DTXSID4043802	9	0	1	0	0	0	1	0	0	0	0	0	0	0	0	1	0	0	0	0	0	0	0	0	0	0	0	0	0	0	0	0	0	0	0	0	0	0	0	0	0	0	0	0
Iron-Dextran Complex	D007505	Iron-Dextran Complex	9004-66-4	DTXSID1031464	DTXSID1031464	9	0	0	0	0	3	0	0	0	0	1	0	0	0	0	0	0	0	0	0	0	0	0	0	0	0	0	0	0	0	0	0	0	1	0	0	0	0	1	0	0	0	0	0
lime	C016538	lime	1305-78-8	DTXSID5029631	DTXSID5029631	9	0	0	0	0	0	0	0	0	0	0	0	0	0	0	0	0	0	0	0	0	0	0	0	0	0	0	0	0	0	0	0	0	0	0	0	0	0	0	0	0	0	0	0
Megestrol Acetate	D019290	Megestrol Acetate	51154-23-5	DTXSID30199178	DTXSID30199178	9	0	0	0	0	0	0	0	0	0	0	0	0	0	0	0	0	0	0	0	0	0	0	0	0	0	0	0	0	0	0	0	0	0	0	0	0	0	0	0	0	0	0	0
Mesalamine	D019804	Mesalamine	6291-36-7	DTXSID30212098	DTXSID30212098	9	0	0	1	0	2	0	0	0	0	0	0	0	0	0	1	0	0	0	0	0	0	0	0	0	0	0	0	0	0	0	0	1	0	1	0	0	0	0	0	0	0	0	0
Mescaline	D008635	Mescaline	54-04-6	DTXSID80202303	DTXSID80202303	9	1	0	0	0	0	0	0	0	3	0	0	0	0	0	0	0	0	1	1	0	0	0	0	0	0	0	0	0	0	0	0	0	1	0	0	0	0	0	0	0	0	0	0
Methysergide	D008784	Methysergide	361-37-5	DTXSID2023307	DTXSID2023307	9	0	0	0	0	0	0	0	0	3	0	0	0	0	0	0	0	0	0	0	0	0	0	0	0	0	0	0	0	0	0	0	0	0	0	0	0	0	0	0	0	0	0	0
montelukast	C093875	montelukast	151767-02-1	DTXSID8046450	DTXSID8046450	9	0	0	2	0	0	0	0	0	1	0	0	0	0	0	0	0	0	0	0	0	0	0	0	1	0	0	1	0	0	0	0	0	0	0	0	0	0	0	0	0	0	0	0
neem oil	C002443	neem oil	8002-65-1	DTXSID70107838	DTXSID70107838	9	2	0	0	2	0	0	0	0	0	0	0	0	0	0	0	0	0	0	0	0	0	0	1	0	0	0	0	0	0	0	0	0	0	0	0	0	0	0	0	0	0	0	0
Pentachlorophenol	D010416	Pentachlorophenol	131-52-2	DTXSID4040264	DTXSID4040264	9	0	5	2	0	0	0	0	0	0	0	0	0	0	0	0	0	0	0	0	0	0	0	0	0	0	0	1	0	0	0	0	0	0	0	0	0	0	0	0	0	0	0	0
Platinum	D010984	Platinum	7440-06-4	DTXSID9064681	DTXSID9064681	9	0	3	2	0	0	0	0	0	0	0	0	0	0	0	0	0	0	0	0	2	0	0	0	0	0	0	0	1	0	0	0	0	0	0	0	0	0	0	0	0	0	0	0
polidocanol	C008976	polidocanol	9002-92-0	DTXSID2025218	DTXSID2025218	9	0	0	0	0	0	0	0	0	0	0	0	0	0	0	0	0	0	0	0	0	0	0	0	0	0	0	0	0	0	2	0	0	0	0	0	0	0	0	0	0	0	0	0
Polyvinyl Chloride	D011143	Polyvinyl Chloride	9002-86-2	DTXSID5025940	DTXSID5025940	9	0	4	1	0	0	0	0	0	0	0	0	0	0	0	0	0	0	0	0	0	0	0	0	0	0	0	0	0	0	0	0	0	0	0	0	0	0	0	0	0	0	0	0
Povidone-Iodine	D011206	Povidone-Iodine	25655-41-8	DTXSID8035712	DTXSID8035712	9	3	0	0	0	0	0	0	0	0	0	0	0	0	0	0	0	0	0	0	1	0	0	0	0	0	0	0	0	0	0	0	0	0	0	0	0	0	0	0	1	0	0	0
rimonabant	C089032	rimonabant	158681-13-1	DTXSID20166495	DTXSID20166495	9	1	1	0	0	0	0	0	0	0	0	0	1	0	0	0	0	0	0	0	0	0	0	0	1	0	0	0	0	0	0	0	0	0	0	0	0	0	0	0	0	0	0	0
Secobarbital	D012631	Secobarbital	76-73-3	DTXSID6044145	DTXSID6044145	9	1	0	0	0	2	0	0	3	0	0	0	0	0	0	0	0	0	1	0	0	0	0	0	0	0	0	0	0	0	0	0	0	0	0	0	0	0	0	0	0	0	0	0
Silver Nitrate	D012835	Silver Nitrate	7761-88-8	DTXSID3032042	DTXSID3032042	9	0	0	0	0	0	0	0	0	0	0	0	0	0	0	0	0	0	0	0	0	0	0	0	0	1	0	0	0	0	0	0	0	0	0	0	0	0	0	0	0	0	0	0
Sodium Chloride, Dietary	D017673	Sodium Chloride, Dietary	7647-14-5	DTXSID3021271	DTXSID3021271	9	0	0	0	0	0	0	0	1	0	0	0	0	0	0	0	0	0	0	0	0	0	0	0	0	0	0	0	0	4	0	0	0	0	0	0	0	0	0	0	0	0	0	0
Squalene	D013185	Squalene	111-02-4	DTXSID0026044	DTXSID0026044	9	0	0	2	1	0	0	0	0	0	0	0	1	0	0	0	0	0	0	0	0	0	0	0	0	0	0	0	0	0	0	0	0	0	0	0	0	0	0	0	0	0	0	0
Taurine	D013654	Taurine	22890-34-2	DTXSID70177430	DTXSID70177430	9	0	0	0	0	0	0	0	0	0	0	1	0	0	0	0	0	0	1	1	0	0	0	0	0	0	0	1	1	0	0	0	0	2	0	1	0	0	0	0	0	0	0	0
Tiotropium Bromide	D000069447	Tiotropium Bromide	136310-93-5	DTXSID2044214	DTXSID2044214	9	0	0	0	0	0	0	0	0	0	0	0	0	0	0	0	0	0	0	0	0	0	0	0	0	0	0	0	0	6	0	0	0	0	0	0	0	0	0	0	0	0	0	0
Triflupromazine	D014273	Triflupromazine	146-54-3	DTXSID9023704	DTXSID9023704	9	2	0	0	0	1	2	1	0	0	0	0	0	0	0	0	0	0	0	0	0	0	0	0	0	0	0	0	0	0	0	0	0	2	0	0	0	0	0	0	0	0	0	0
Tripelennamine	D014309	Tripelennamine	494-40-6	DTXSID20197784	DTXSID20197784	9	3	0	0	0	0	0	0	0	2	0	0	1	0	1	0	0	1	0	0	0	0	0	0	0	0	0	0	0	0	0	0	0	0	0	0	0	0	0	0	0	0	0	0
Uranium	D014501	Uranium	7440-61-1	DTXSID1042522	DTXSID1042522	9	0	3	1	0	0	1	0	0	0	0	0	0	0	0	0	0	0	1	0	0	0	0	0	0	0	0	0	0	0	0	0	0	0	0	0	0	0	0	0	0	0	0	0
Xylitol	D014993	Xylitol	87-99-0	DTXSID7042514	DTXSID7042514	9	1	0	0	3	0	0	0	0	0	0	0	0	0	0	0	0	0	0	0	0	0	0	0	0	0	0	0	0	0	0	0	0	0	0	0	0	0	0	0	0	0	0	0
1,2,3,4-tetrahydroisoquinoline	C014843	1,2,3,4-tetrahydroisoquinoline	91-21-4	DTXSID6026115	DTXSID6026115	8	0	0	0	0	0	0	5	0	0	0	0	0	0	0	0	0	0	0	0	0	0	0	0	0	0	0	0	0	0	0	0	0	0	0	0	0	0	1	0	0	0	0	0
2-(3-methoxyphenyl)-2-(ethylamino)cyclohexanone	C569113	2-(3-methoxyphenyl)-2-(ethylamino)cyclohexanone	(blank)	DTXSID301009327	DTXSID301009327	8	3	0	0	0	0	0	0	0	0	0	0	0	0	0	0	0	0	0	0	0	0	1	0	0	0	0	0	0	0	0	0	0	0	0	0	0	0	0	0	0	0	0	0
Acetylene	D000114	Acetylene	74-86-2	DTXSID6026379	DTXSID6026379	8	2	0	0	0	0	0	0	1	0	0	0	0	1	0	0	0	0	0	0	0	0	0	0	0	0	0	0	0	0	1	0	1	0	0	0	0	0	0	0	0	0	0	0
Alfaxalone Alfadolone Mixture	D000530	Alfaxalone Alfadolone Mixture	(blank)	DTXSID001001405	DTXSID001001405	8	3	0	0	0	0	0	0	0	0	1	0	0	0	0	0	0	1	0	0	0	0	0	0	0	0	0	0	0	0	0	0	0	0	0	0	0	0	0	0	0	0	0	0
Altretamine	D006585	Altretamine	645-05-6	DTXSID4022579	DTXSID4022579	8	0	3	1	0	0	0	0	0	0	0	0	0	0	0	0	0	0	1	0	0	0	1	0	0	0	0	0	0	0	0	0	0	0	0	0	0	1	0	0	0	0	0	0
Aminopropionitrile	D000629	Aminopropionitrile	151-18-8	DTXSID6048418	DTXSID6048418	8	0	3	2	0	0	0	0	0	0	1	0	0	0	0	0	0	0	0	0	0	1	0	0	0	0	0	1	0	0	0	0	0	0	0	0	0	0	0	0	0	0	0	0
benzonidazole	C009999	benzonidazole	22994-85-0	DTXSID9046570	DTXSID9046570	8	0	0	1	2	0	0	0	0	0	0	0	0	0	0	0	0	0	1	0	0	0	0	0	0	0	0	0	0	0	0	0	2	0	0	0	0	0	0	0	0	0	0	0
Bethanidine	D001627	Bethanidine	114-85-2	DTXSID7048748	DTXSID7048748	8	0	0	0	0	0	0	0	0	0	0	0	0	0	0	0	0	0	0	0	0	0	0	0	0	0	0	0	0	0	0	0	0	0	0	0	0	7	0	0	0	0	0	0
bismuth subnitrate	C010804	bismuth subnitrate	1304-85-4	DTXSID40893872	DTXSID40893872	8	1	0	0	2	0	0	0	0	0	0	0	0	0	0	0	0	5	0	0	0	0	0	0	0	0	0	0	0	0	0	0	0	0	0	0	0	0	0	0	0	0	0	0
Cellulose, Oxidized	D002483	Cellulose, Oxidized	(blank)	DTXSID001009328	DTXSID001009328	8	0	0	0	1	0	0	0	0	0	0	0	0	0	0	0	0	0	0	0	0	0	0	0	0	0	0	0	0	0	0	0	0	0	0	0	0	0	0	0	0	0	0	0
Chlormadinone Acetate	D002715	Chlormadinone Acetate	302-22-7	DTXSID6020274	DTXSID6020274	8	1	0	0	0	0	0	0	0	0	0	0	0	0	0	0	0	0	0	0	0	1	0	0	1	0	0	0	0	0	0	0	0	0	0	0	0	0	0	0	0	0	0	0
Chlorodiphenyl (54% Chlorine)	D020111	Chlorodiphenyl (54% Chlorine)	11097-69-1	DTXSID5020100	DTXSID5020100	8	0	2	0	0	1	0	0	0	0	0	0	0	0	0	0	0	0	0	0	2	0	0	0	0	0	0	0	2	0	0	0	0	0	0	0	0	0	0	0	0	0	0	0
cifenline	C032151	cifenline	53267-01-9	DTXSID9022819	DTXSID9022819	8	0	0	0	0	0	0	0	1	0	0	0	0	0	0	0	1	0	0	0	0	0	0	0	0	0	0	0	0	0	0	0	0	0	1	0	0	0	0	0	0	0	0	0
crizotinib	C551994	crizotinib	(blank)	DTXSID701009329	DTXSID701009329	8	0	0	0	0	0	0	0	0	0	0	0	0	0	0	0	0	0	0	0	0	0	0	0	0	0	0	0	0	0	1	0	0	0	0	0	0	0	0	0	0	0	0	0
deferiprone	C044919	deferiprone	30652-11-0	DTXSID6040666	DTXSID6040666	8	1	2	0	0	0	0	0	0	0	0	0	0	0	0	0	0	0	0	0	1	0	0	0	0	0	0	0	0	0	0	0	0	0	0	0	0	0	0	0	0	0	0	0
desmethylmisonidazole	C009997	desmethylmisonidazole	13551-92-3	DTXSID50875669	DTXSID50875669	8	0	3	3	0	0	0	0	0	0	0	0	1	0	0	0	0	0	0	0	1	0	0	0	0	0	0	0	0	0	0	0	0	0	0	0	0	0	0	0	0	0	0	0
Desvenlafaxine Succinate	D000069468	Desvenlafaxine Succinate	(blank)	DTXSID70959511	DTXSID70959511	8	2	0	0	0	0	0	0	0	0	0	0	0	0	0	0	0	0	0	0	0	0	0	0	0	1	0	0	0	0	0	0	0	0	0	0	0	0	0	2	0	0	0	0
Dicumarol	D001728	Dicumarol	66-76-2	DTXSID8021729	DTXSID8021729	8	0	0	0	0	0	0	0	0	0	0	0	0	0	3	0	0	0	0	0	0	0	0	0	0	0	0	0	0	0	0	0	0	0	0	1	0	0	0	0	0	0	0	0
Ethynodiol Diacetate	D005040	Ethynodiol Diacetate	297-76-7	DTXSID4020614	DTXSID4020614	8	0	1	0	0	0	0	0	0	0	0	0	0	0	0	0	0	0	0	0	0	1	0	0	2	0	0	0	0	0	0	0	0	0	0	0	0	0	0	0	0	0	0	0
Etidronic Acid	D012968	Etidronic Acid	14860-53-8	DTXSID3029732	DTXSID3029732	8	0	0	0	0	0	0	0	0	1	0	1	0	0	0	0	0	0	0	0	0	0	1	0	0	0	0	0	0	0	0	1	0	0	0	0	0	0	0	0	0	0	0	0
Eugenol	D005054	Eugenol	97-53-0	DTXSID9020617	DTXSID9020617	8	1	0	0	0	0	0	1	1	0	0	0	0	0	0	2	0	0	0	0	0	0	0	0	0	0	0	0	0	0	0	0	0	0	0	0	0	0	0	0	0	0	0	0
flupirtine	C034161	flupirtine	56995-20-1	DTXSID4048436	DTXSID4048436	8	1	0	0	0	0	0	0	0	0	0	0	0	0	0	0	0	0	1	0	0	0	1	0	0	0	0	0	0	0	0	0	0	0	1	0	0	0	0	0	0	0	1	0
Framycetin	D005601	Framycetin	119-04-0	DTXSID2023359	DTXSID2023359	8	0	0	0	0	0	0	0	0	0	0	0	0	0	0	0	0	0	0	0	1	0	0	0	0	0	0	0	2	0	0	1	0	0	0	0	0	0	0	0	3	0	0	0
gatifloxacin	C078049	gatifloxacin	112811-59-3	DTXSID5045704	DTXSID5045704	8	4	0	0	0	0	0	0	0	1	0	0	0	1	0	0	0	0	0	0	0	0	0	2	0	0	0	0	0	0	0	0	0	0	0	0	0	0	0	0	0	0	0	0
Glycyrrhizic Acid	D019695	Glycyrrhizic Acid	79165-06-3	DTXSID90229561	DTXSID90229561	8	0	1	0	0	4	0	0	0	0	0	0	0	0	0	0	0	0	0	0	0	0	0	0	0	0	0	0	0	0	0	0	0	0	0	0	0	0	0	0	0	0	0	0
imiquimod	C056493	imiquimod	99011-02-6	DTXSID7041047	DTXSID7041047	8	0	0	1	0	0	0	0	0	0	0	0	0	1	0	0	0	0	0	0	0	0	0	0	0	0	0	1	0	0	0	1	0	0	0	0	0	1	0	0	0	0	0	0
iodoform	C010473	iodoform	75-47-8	DTXSID4020743	DTXSID4020743	8	0	1	0	1	0	0	0	1	1	0	0	0	0	0	0	0	0	0	0	0	0	1	0	0	0	0	0	0	0	0	0	0	0	0	0	0	0	0	0	0	0	0	0
Lanthanum	D007811	Lanthanum	7439-91-0	DTXSID0064676	DTXSID0064676	8	0	1	0	0	0	0	0	0	0	0	4	0	0	0	0	0	0	0	0	0	0	2	0	0	0	0	0	0	0	0	0	0	0	0	0	0	0	0	0	0	0	0	0
Lynestrenol	D008234	Lynestrenol	52-76-6	DTXSID4021478	DTXSID4021478	8	0	0	0	0	0	0	0	0	0	0	0	0	0	0	0	0	0	0	0	0	0	0	0	1	0	0	0	0	0	0	0	0	1	0	0	0	0	0	0	0	0	0	0
Megestrol	D008535	Megestrol	(blank)	DTXSID001009330	DTXSID001009330	8	1	0	0	0	0	0	0	0	0	0	0	0	0	1	0	0	0	0	0	0	0	0	0	0	0	0	0	0	0	0	0	0	0	0	0	0	1	0	0	0	0	0	0
mephedrone	C548233	mephedrone	1189805-46-6	DTXSID20891437	DTXSID20891437	8	0	0	0	0	0	0	0	0	0	0	2	0	1	0	0	0	0	0	0	0	0	0	0	0	0	0	0	0	0	0	0	0	0	0	0	0	0	0	0	0	0	0	0
Methandrostenolone	D008696	Methandrostenolone	72-63-9	DTXSID2023276	DTXSID2023276	8	0	0	0	0	1	0	0	0	0	0	0	0	0	1	0	0	0	0	0	0	0	0	0	0	0	0	0	0	0	0	0	0	0	0	0	0	0	0	0	0	0	0	0
methyl 6,7-dimethoxy-4-ethyl-beta-carboline-3-carboxylate	C034818	methyl 6,7-dimethoxy-4-ethyl-beta-carboline-3-carboxylate	82499-00-1	DTXSID90896999	DTXSID90896999	8	5	0	0	0	0	0	0	0	0	0	0	0	0	0	0	0	0	0	1	0	0	0	0	0	0	1	0	0	0	0	0	0	0	0	0	0	0	0	0	0	0	0	0
methyl isocyanate	C008461	methyl isocyanate	624-83-9	DTXSID1023786	DTXSID1023786	8	0	4	0	0	0	0	0	0	0	0	0	0	0	0	0	0	0	0	0	0	0	0	0	0	0	0	0	0	0	0	0	0	0	0	0	0	0	0	0	0	0	0	1
Minoxidil	D008914	Minoxidil	38304-91-5	DTXSID9040685	DTXSID9040685	8	0	0	0	0	0	0	0	0	0	0	0	0	0	0	0	0	0	0	0	0	0	0	0	0	0	0	0	0	0	0	0	0	0	1	0	0	1	0	0	0	0	0	0
Mitotane	D008939	Mitotane	53-19-0	DTXSID9020372	DTXSID9020372	8	0	1	0	0	0	0	0	0	0	1	0	2	0	0	0	0	0	0	0	0	0	0	0	0	0	0	0	0	0	0	0	0	0	0	0	0	0	0	0	0	0	0	2
Monocrotophos	D008999	Monocrotophos	6923-22-4	DTXSID9034816	DTXSID9034816	8	0	1	0	0	0	0	1	0	0	0	0	1	0	0	0	0	0	0	0	0	1	0	0	0	0	0	0	0	0	0	0	0	0	0	0	0	0	0	0	0	0	0	0
Nevirapine	D019829	Nevirapine	220988-26-1	DTXSID30176606	DTXSID30176606	8	0	0	3	0	0	0	0	0	0	0	0	1	0	0	0	0	0	0	0	0	0	0	0	0	0	0	0	1	0	0	0	0	0	0	0	0	0	0	0	0	0	0	0
Oxotremorine	D010095	Oxotremorine	70-22-4	DTXSID10220252	DTXSID10220252	8	1	0	0	0	0	0	0	0	0	6	1	0	0	0	0	0	0	0	0	0	0	0	0	0	0	0	0	0	0	0	0	0	0	0	0	0	0	0	0	0	0	0	0
Oxymetholone	D010110	Oxymetholone	434-07-1	DTXSID5023794	DTXSID5023794	8	0	1	0	0	0	0	0	0	0	0	0	0	0	0	0	0	0	0	0	0	0	1	0	0	0	0	0	0	0	0	0	0	0	0	1	0	0	0	0	0	0	0	0
Pentamidine	D010419	Pentamidine	140-64-7	DTXSID5023796	DTXSID5023796	8	0	0	1	0	0	0	0	1	0	0	0	0	0	0	0	0	0	0	0	0	0	0	0	0	0	0	0	1	0	0	0	0	0	1	0	0	0	0	0	0	0	0	0
Perazine	D010464	Perazine	84-97-9	DTXSID6048628	DTXSID6048628	8	0	1	1	0	0	1	0	0	0	0	0	0	0	0	0	1	0	0	0	0	0	0	0	0	0	0	0	0	0	0	0	0	0	0	0	0	0	0	0	0	0	0	0
phenazepam	C017928	phenazepam	51753-57-2	DTXSID00199685	DTXSID00199685	8	0	0	0	0	0	0	0	0	1	0	1	0	1	0	0	0	0	1	0	0	0	3	0	0	0	0	0	0	0	0	0	0	0	0	0	0	0	0	0	0	0	0	0
Phosphamidon	D010707	Phosphamidon	13171-21-6	DTXSID7021156	DTXSID7021156	8	0	2	0	0	0	0	0	0	0	1	1	0	0	0	0	0	0	1	0	0	0	0	0	0	0	0	0	0	0	0	0	1	0	0	0	0	0	0	0	0	0	0	0
Phosphorus	D010758	Phosphorus	7723-14-0	DTXSID1024382	DTXSID1024382	8	0	0	0	0	0	0	0	0	0	0	0	0	0	0	0	0	0	0	0	0	0	0	0	0	0	0	0	0	0	0	0	0	0	0	2	1	0	0	0	0	0	0	0
Podophyllotoxin	D011034	Podophyllotoxin	518-28-5	DTXSID3045645	DTXSID3045645	8	0	0	2	0	0	0	0	1	0	0	0	1	0	0	1	0	0	0	0	0	0	0	0	0	0	0	0	0	0	0	0	1	0	0	0	0	0	0	0	0	0	0	0
posaconazole	C101425	posaconazole	171228-49-2	DTXSID6049066	DTXSID6049066	8	0	1	3	0	0	0	0	0	1	0	0	0	0	0	0	0	0	0	0	0	0	0	0	0	0	0	0	0	0	0	0	0	0	0	0	0	0	0	0	0	0	0	0
Propylene Glycol	D019946	Propylene Glycol	57-55-6	DTXSID0021206	DTXSID0021206	8	0	1	0	0	0	0	0	2	0	0	0	1	0	0	0	0	0	0	0	0	0	0	1	0	0	0	0	0	0	0	0	0	0	0	0	0	0	0	0	0	0	0	0
quazepam	C025130	quazepam	36735-22-5	DTXSID60190193	DTXSID60190193	8	0	0	0	0	0	0	0	0	0	0	0	0	0	0	0	0	0	0	0	0	0	0	0	2	0	0	3	0	0	0	0	0	0	0	0	0	0	0	0	0	0	1	0
Remoxipride	D017330	Remoxipride	80125-14-0	DTXSID6045668	DTXSID6045668	8	0	0	0	0	0	5	1	0	0	0	0	0	0	0	0	0	0	0	0	0	0	0	0	0	0	0	0	0	0	0	0	0	1	0	0	0	0	0	0	0	0	0	0
roquefortine	C012536	roquefortine	58735-64-1	DTXSID20891816	DTXSID20891816	8	1	0	0	0	0	0	0	0	0	3	0	0	0	0	0	0	0	3	0	0	0	0	1	0	0	0	0	0	0	0	0	0	0	0	0	0	0	0	0	0	0	0	0
Sodium Fluoride	D012969	Sodium Fluoride	7681-49-4	DTXSID2020630	DTXSID2020630	8	0	0	0	0	0	0	0	0	0	0	2	0	0	0	0	0	0	0	0	1	0	0	0	0	0	0	0	0	0	0	0	0	0	0	0	0	0	0	0	0	0	0	0
Sodium Nitrite	D012977	Sodium Nitrite	7632-00-0	DTXSID0020941	DTXSID0020941	8	1	0	0	0	0	0	0	1	0	0	0	1	0	0	0	0	0	0	0	0	0	0	0	0	0	0	0	0	0	0	0	0	0	0	0	0	0	0	0	0	0	0	0
Temazepam	D013693	Temazepam	846-50-4	DTXSID8021309	DTXSID8021309	8	0	0	0	0	0	0	1	0	1	0	0	0	0	0	0	0	0	0	0	0	0	0	0	0	0	0	2	0	0	0	0	0	0	0	0	0	1	0	0	0	0	1	0
Tenofovir	D000068698	Tenofovir	147127-20-6	DTXSID9040132	DTXSID9040132	8	0	1	1	0	1	0	0	0	0	0	0	0	0	0	0	0	0	0	0	0	0	0	0	0	0	0	3	0	0	0	0	0	0	0	0	0	0	0	0	0	0	0	0
Thiotepa	D013852	Thiotepa	52-24-4	DTXSID0021339	DTXSID0021339	8	1	2	0	0	0	0	0	0	0	0	2	0	0	0	0	0	0	0	0	0	0	0	0	0	0	0	0	0	1	0	0	0	0	0	0	0	0	0	1	0	0	0	0
Thymol	D013943	Thymol	89-83-8	DTXSID6034972	DTXSID6034972	8	0	1	0	0	0	0	0	0	0	1	0	0	0	0	1	0	0	0	0	0	0	0	0	0	0	0	0	0	0	0	0	0	0	0	0	0	0	0	0	0	0	0	0
tibolone	C027385	tibolone	5630-53-5	DTXSID5023667	DTXSID5023667	8	0	0	0	0	0	0	0	0	0	0	0	0	0	0	0	0	0	0	0	0	0	0	0	0	0	0	0	0	8	0	0	0	0	0	0	0	0	0	0	0	0	0	0
Triprolidine	D014311	Triprolidine	6138-79-0	DTXSID0021410	DTXSID0021410	8	0	0	0	0	0	0	0	0	6	0	0	0	0	0	0	0	1	0	0	0	0	0	0	1	0	0	0	0	0	0	0	0	0	0	0	0	0	0	0	0	0	0	0
trovafloxacin	C080163	trovafloxacin	147059-72-1	DTXSID0041145	DTXSID0041145	8	1	1	0	0	0	0	0	0	0	1	0	0	0	0	0	0	0	0	0	0	0	1	0	0	0	1	0	0	0	0	0	1	0	0	0	0	0	0	0	0	0	0	0
Vanadium	D014639	Vanadium	7440-62-2	DTXSID2040282	DTXSID2040282	8	0	0	0	1	0	0	0	0	0	0	1	1	0	0	0	0	0	0	0	0	0	0	0	0	0	0	0	0	0	0	0	0	0	0	0	0	0	0	0	0	0	0	0
Zineb	D015038	Zineb	12122-67-7	DTXSID5021465	DTXSID5021465	8	2	0	0	1	0	0	0	0	0	0	0	0	0	0	0	0	0	0	0	0	0	0	0	0	0	0	0	0	0	0	0	0	0	0	0	0	0	1	0	0	0	0	0
2-Hydroxypropyl-beta-cyclodextrin	D000073738	2-Hydroxypropyl-beta-cyclodextrin	128446-35-5	DTXSID20894281	DTXSID20894281	7	0	0	0	0	0	0	0	0	0	0	0	0	0	0	0	0	0	1	0	2	1	0	0	0	0	0	0	0	0	0	1	0	0	0	0	0	0	0	0	0	0	0	0
2-Methyl-4-chlorophenoxyacetic Acid	D008456	2-Methyl-4-chlorophenoxyacetic Acid	94-74-6	DTXSID4024195	DTXSID4024195	7	0	1	0	0	0	0	0	1	0	0	0	1	0	0	0	0	0	0	0	0	0	0	0	0	0	0	0	0	0	0	0	0	0	0	0	0	0	0	0	0	0	0	0
3,4-methylenedioxyethamphetamine	C051800	3,4-methylenedioxyethamphetamine	74341-78-9	DTXSID0048892	DTXSID0048892	7	0	5	0	1	0	0	0	0	0	0	0	0	0	0	0	0	0	0	0	0	0	1	0	0	0	0	0	0	0	0	0	0	0	0	0	0	0	0	0	0	0	0	0
4-bromophenylacetylurea	C004506	4-bromophenylacetylurea	30241-86-2	DTXSID40184338	DTXSID40184338	7	0	1	3	0	0	0	0	0	0	0	0	0	0	0	0	0	0	1	0	0	1	0	0	0	0	0	0	0	0	0	0	0	0	0	0	1	0	0	0	0	0	0	0
Acetic Acid	D019342	Acetic Acid	64-19-7	DTXSID5024394	DTXSID5024394	7	0	0	0	0	0	1	0	0	0	1	0	0	0	0	0	0	0	0	0	0	0	0	0	0	1	0	0	0	0	0	0	0	0	0	0	0	0	0	0	0	0	0	0
acromelic acid A	C051743	acromelic acid A	86630-09-3	DTXSID70897146	DTXSID70897146	7	2	0	0	0	0	0	0	0	0	0	0	0	0	0	0	0	0	0	0	0	1	0	0	0	1	0	0	0	0	0	0	0	0	0	0	0	0	0	0	0	0	0	1
Agent Orange	D000075182	Agent Orange	39277-47-9	DTXSID70895783	DTXSID70895783	7	0	2	2	0	0	0	0	0	0	0	0	0	0	0	0	0	0	0	0	0	0	0	0	0	0	0	0	0	0	0	0	0	0	0	0	0	0	0	0	0	0	0	1
Aldicarb	D000448	Aldicarb	1646-75-9	DTXSID9024431	DTXSID9024431	7	0	1	1	0	1	0	0	0	0	1	0	0	0	0	0	0	0	1	0	0	0	0	0	0	0	0	0	0	0	0	0	0	0	0	0	0	0	0	0	0	0	0	0
Ammonium Chloride	D000643	Ammonium Chloride	12125-02-9	DTXSID0020078	DTXSID0020078	7	1	0	0	0	0	0	0	3	0	0	0	0	0	0	0	0	0	0	0	0	0	0	0	0	0	0	0	0	0	0	0	0	0	0	1	0	0	0	0	0	0	0	0
barium chloride	C024986	barium chloride	10361-37-2	DTXSID7044508	DTXSID7044508	7	1	0	0	0	1	0	0	1	0	0	0	0	0	0	0	0	0	0	0	0	1	0	0	0	0	0	0	0	0	0	0	0	0	0	0	0	0	0	0	0	0	0	1
Bumetanide	D002034	Bumetanide	28395-03-1	DTXSID5022699	DTXSID5022699	7	0	0	0	0	3	0	0	0	0	0	0	0	0	0	0	0	0	0	0	1	0	0	0	0	1	0	0	1	0	0	0	0	0	0	0	0	0	0	0	0	0	0	0
Calcium Carbonate	D002119	Calcium Carbonate	14791-73-2	DTXSID80163829	DTXSID80163829	7	2	1	0	1	0	0	0	1	0	0	0	0	0	0	0	0	0	0	0	0	0	0	0	0	0	0	0	0	0	0	0	0	0	0	0	0	0	0	0	0	0	0	0
Carnitine	D002331	Carnitine	541-15-1	DTXSID4023208	DTXSID4023208	7	1	0	0	0	2	0	0	0	0	0	0	0	0	0	0	0	0	0	0	0	0	0	0	0	0	0	0	0	0	0	0	0	0	0	0	0	0	0	0	0	0	0	1
Cefuroxime	D002444	Cefuroxime	55268-75-2	DTXSID5022774	DTXSID5022774	7	0	0	0	1	0	0	0	0	0	0	0	0	0	0	0	0	1	0	0	0	0	1	0	0	0	0	0	1	0	0	0	0	0	0	0	0	0	0	0	0	0	0	0
Cellulose	D002482	Cellulose	9004-34-6	DTXSID3050492	DTXSID3050492	7	0	1	0	0	0	0	0	0	0	0	0	0	0	0	0	0	0	0	0	0	0	0	0	0	0	0	1	0	0	1	0	0	0	0	0	0	0	0	0	0	0	0	0
chlorophacinone	C004662	chlorophacinone	3691-35-8	DTXSID2032348	DTXSID2032348	7	0	0	0	0	0	0	0	1	0	0	0	0	0	1	0	0	0	0	0	0	0	0	0	0	0	0	0	0	0	0	0	0	0	0	0	1	0	0	0	0	0	0	0
Cycloheximide	D003513	Cycloheximide	66-81-9	DTXSID6024882	DTXSID6024882	7	0	0	0	0	0	0	0	0	0	0	3	0	0	0	0	0	0	0	0	0	0	0	0	0	0	0	0	0	0	0	0	0	0	0	0	0	0	0	0	0	0	3	0
cyclohexyl methylphosphonofluoridate	C053914	cyclohexyl methylphosphonofluoridate	329-99-7	DTXSID00861875	DTXSID00861875	7	3	1	0	0	0	0	0	0	0	0	0	0	0	0	0	0	0	0	0	0	0	0	0	0	0	0	0	0	0	0	0	0	0	0	0	0	0	0	0	0	0	0	0
desloratadine	C121345	desloratadine	100643-71-8	DTXSID1044196	DTXSID1044196	7	0	0	0	0	0	0	0	0	0	0	0	1	0	0	0	0	0	2	1	0	0	0	0	2	0	0	0	0	0	0	0	0	0	0	0	0	0	0	0	0	0	0	0
Deuterium	D003903	Deuterium	7782-39-0	DTXSID2064810	DTXSID2064810	7	0	0	0	0	0	0	0	1	0	0	0	1	0	0	0	0	0	2	0	0	0	0	0	0	0	0	0	0	0	0	0	0	0	0	0	1	0	0	0	0	0	0	0
Dibucaine	D003992	Dibucaine	85-79-0	DTXSID3045271	DTXSID3045271	7	1	1	0	0	0	0	0	0	0	0	0	0	0	0	0	0	0	1	0	0	0	1	0	0	0	0	0	0	0	0	0	0	0	0	0	0	0	0	0	0	0	0	0
Diethylcarbamazine	D004049	Diethylcarbamazine	1642-54-2	DTXSID4045555	DTXSID4045555	7	0	0	0	0	0	0	0	0	0	0	0	0	0	0	0	0	0	0	0	0	1	0	0	0	0	0	0	0	0	0	0	0	0	0	0	0	0	0	0	0	0	0	0
entacapone	C071192	entacapone	130929-57-6	DTXSID5046439	DTXSID5046439	7	0	0	1	0	0	0	1	0	0	0	0	0	0	0	0	0	0	0	0	0	0	0	0	0	0	0	0	0	0	0	0	0	0	0	0	0	0	0	0	0	0	0	0
ethylbenzene	C004912	ethylbenzene	100-41-4	DTXSID3020596	DTXSID3020596	7	0	0	0	0	0	0	0	0	0	0	1	0	0	0	0	0	0	0	0	0	0	0	0	0	0	0	0	1	0	0	1	0	0	0	0	0	0	0	0	2	0	0	0
etoricoxib	C422649	etoricoxib	202409-33-4	DTXSID3046457	DTXSID3046457	7	1	0	0	0	0	0	0	0	0	0	1	0	0	0	0	0	0	0	0	0	0	0	0	0	0	0	0	0	1	0	0	0	0	0	0	0	0	0	0	0	0	0	0
flupenthixol decanoate	C007761	flupenthixol decanoate	30909-51-4	DTXSID10897160	DTXSID10897160	7	0	0	0	0	0	2	2	0	0	0	0	0	0	0	0	1	0	0	0	0	0	0	0	0	0	0	0	0	0	0	0	0	0	0	0	0	0	0	0	0	0	0	0
Formoterol Fumarate	D000068759	Formoterol Fumarate	43229-80-7	DTXSID5044239	DTXSID5044239	7	0	0	0	0	0	0	0	0	1	3	0	0	1	0	0	0	0	0	0	0	0	0	0	0	0	0	0	0	0	0	0	0	0	1	0	0	0	0	0	0	0	0	0
germanium oxide	C040516	germanium oxide	1310-53-8	DTXSID0051653	DTXSID0051653	7	0	0	1	0	1	0	0	0	0	0	0	0	0	0	0	0	0	0	0	1	0	0	0	0	0	0	0	0	0	0	0	0	0	0	0	0	0	0	0	0	0	0	0
gluconic acid	C030691	gluconic acid	60816-70-8	DTXSID40209656	DTXSID40209656	7	0	0	0	0	0	0	0	0	0	0	0	0	0	0	0	0	0	0	0	0	0	0	0	0	0	0	0	0	0	0	0	0	0	0	0	0	0	0	0	0	0	0	0
homatropine	C100236	homatropine	87-00-3	DTXSID6044014	DTXSID6044014	7	0	0	0	0	0	1	0	0	1	0	0	0	2	0	0	0	0	0	0	0	0	2	0	0	0	0	0	0	0	0	0	0	0	0	0	0	0	0	0	0	0	0	0
Hydralazine	D006830	Hydralazine	86-54-4	DTXSID4023129	DTXSID4023129	7	0	0	2	0	0	0	0	0	0	0	0	0	0	0	0	0	0	0	0	0	1	0	0	1	0	0	0	0	0	0	0	0	0	0	0	0	0	0	0	0	0	0	0
hydrazine	C029424	hydrazine	13464-80-7	DTXSID5065483	DTXSID5065483	7	1	1	1	1	0	0	0	0	0	0	1	0	0	0	0	0	0	0	0	0	0	0	0	0	0	0	0	0	0	0	0	0	0	0	2	0	0	0	0	0	0	0	0
iomeprol	C057937	iomeprol	78649-41-9	DTXSID1049061	DTXSID1049061	7	3	0	0	0	0	0	0	0	0	0	0	0	0	0	0	0	0	0	1	0	0	0	0	0	0	0	0	0	0	0	0	0	0	0	0	0	0	0	0	0	0	0	0
Iproniazid	D007490	Iproniazid	54-92-2	DTXSID5023168	DTXSID5023168	7	1	0	0	0	0	0	0	0	0	2	0	0	0	0	0	0	1	0	0	0	0	0	0	0	0	1	0	0	0	0	0	0	0	0	1	0	0	0	0	0	0	0	0
Isocarboxazid	D007520	Isocarboxazid	59-63-2	DTXSID4023171	DTXSID4023171	7	0	1	0	0	0	0	0	0	0	0	0	0	0	0	0	0	0	0	0	0	0	0	0	0	0	0	1	0	0	0	0	0	0	0	0	0	3	0	0	0	0	0	1
isofenphos	C035019	isofenphos	25311-71-1	DTXSID8032417	DTXSID8032417	7	0	2	0	1	0	0	0	0	0	0	0	0	0	0	0	0	0	1	0	0	1	0	0	0	0	0	0	0	0	0	0	1	0	0	0	0	0	0	0	0	0	0	1
Lactic Acid	D019344	Lactic Acid	515-98-0	DTXSID3052808	DTXSID3052808	7	0	0	0	1	1	0	0	0	0	0	1	0	0	0	0	0	0	0	0	0	0	0	0	0	0	0	0	0	0	1	0	0	0	0	0	0	0	0	0	0	0	0	0
Loperamide	D008139	Loperamide	53179-11-6	DTXSID6045165	DTXSID6045165	7	1	1	0	0	0	0	0	0	0	0	0	0	2	0	0	0	0	0	0	0	0	0	0	0	1	0	0	0	0	0	0	0	0	0	0	0	0	0	0	0	0	0	0
meloxicam	C065757	meloxicam	71125-38-7	DTXSID1020803	DTXSID1020803	7	0	1	0	0	0	0	0	0	0	0	0	0	0	0	0	0	0	0	0	0	0	0	0	0	0	0	0	0	1	0	0	0	0	0	0	0	0	0	0	0	0	0	0
Menthol	D008610	Menthol	2216-51-5	DTXSID1022180	DTXSID1022180	7	1	0	0	1	1	0	0	0	0	0	0	0	2	0	0	0	0	1	0	0	0	0	0	0	0	0	0	0	1	0	0	0	0	0	0	0	0	0	0	0	0	0	0
Mercuric Chloride	D008627	Mercuric Chloride	7487-94-7	DTXSID5020811	DTXSID5020811	7	0	0	2	0	0	0	0	0	0	1	1	0	0	0	0	0	0	0	1	0	0	0	0	0	0	0	0	0	0	0	0	0	0	0	0	0	0	0	0	0	0	0	0
Metaproterenol	D009921	Metaproterenol	586-06-1	DTXSID8048529	DTXSID8048529	7	0	0	0	0	1	0	0	0	0	3	0	0	0	0	0	0	0	0	0	0	0	0	0	0	0	0	1	0	0	0	0	0	0	0	0	0	0	0	0	0	0	0	1
Methoxyflurane	D008733	Methoxyflurane	76-38-0	DTXSID7025556	DTXSID7025556	7	0	0	0	1	0	0	0	0	0	0	0	0	0	0	1	0	0	0	0	0	0	0	0	0	0	0	0	0	0	0	0	0	0	0	2	0	0	0	0	0	0	0	0
Methyl Chloride	D008737	Methyl Chloride	74-87-3	DTXSID0021541	DTXSID0021541	7	0	2	0	0	0	0	0	0	0	0	0	0	0	0	0	0	0	0	0	0	0	0	0	0	0	0	0	0	0	0	0	0	0	0	0	0	0	0	0	0	0	0	0
methylamphotericin B	C017501	methylamphotericin B	(blank)	DTXSID701009331	DTXSID701009331	7	0	0	1	3	0	0	0	0	0	0	0	0	0	0	0	0	0	0	0	0	0	0	0	0	0	0	0	0	0	0	0	0	0	0	0	0	0	0	0	0	0	0	0
Methylmethacrylate	D020366	Methylmethacrylate	80-62-6	DTXSID2020844	DTXSID2020844	7	0	0	2	1	0	0	0	0	0	0	0	0	0	0	2	0	0	0	0	0	0	0	0	0	0	0	0	0	0	0	0	0	0	0	0	0	0	0	0	0	0	0	0
Metrizoic Acid	D008794	Metrizoic Acid	1949-45-7	DTXSID6023311	DTXSID6023311	7	0	0	0	0	0	0	0	0	0	0	0	1	0	0	3	0	0	0	0	0	0	0	0	0	0	0	0	0	0	0	0	0	0	0	0	0	0	0	0	0	0	0	0
milnacipran	C048107	milnacipran	92623-85-3	DTXSID3048287	DTXSID3048287	7	0	0	0	0	0	0	1	0	0	1	0	0	0	0	0	0	0	0	0	0	0	0	0	1	0	0	0	0	1	0	0	0	0	0	0	0	1	1	0	0	0	0	0
Nimustine	D015376	Nimustine	42471-28-3	DTXSID0045179	DTXSID0045179	7	0	1	0	2	0	0	0	0	0	0	0	0	0	0	0	0	0	0	0	0	0	0	0	0	0	0	0	0	0	1	0	0	0	0	0	1	0	0	0	0	0	0	0
nitromethane	C008640	nitromethane	75-52-5	DTXSID2020977	DTXSID2020977	7	0	0	1	0	0	0	1	0	0	0	0	0	0	0	0	0	0	0	0	0	0	0	1	0	0	2	0	0	0	0	0	0	0	0	0	0	0	0	0	0	0	0	0
N-methylolacrylamide	C066443	N-methylolacrylamide	924-42-5	DTXSID3020885	DTXSID3020885	7	0	0	2	0	0	0	0	0	0	0	0	1	0	0	1	0	0	2	0	0	1	0	0	0	0	0	0	0	0	0	0	0	0	0	0	0	0	0	0	0	0	0	0
omega-Chloroacetophenone	D002721	omega-Chloroacetophenone	532-27-4	DTXSID9020293	DTXSID9020293	7	0	0	0	0	0	0	0	0	0	0	0	0	0	0	0	0	0	0	0	0	0	0	0	0	0	0	0	0	0	0	0	0	0	0	0	0	0	0	0	0	0	0	0
Ornidazole	D009950	Ornidazole	16773-42-5	DTXSID4045420	DTXSID4045420	7	0	0	1	0	0	0	0	0	0	0	0	0	0	0	0	0	0	0	0	0	0	0	0	0	0	0	0	0	0	0	0	0	0	0	0	0	0	0	0	0	0	0	0
Oxamniquine	D010073	Oxamniquine	21738-42-1	DTXSID3023398	DTXSID3023398	7	4	1	0	0	0	0	0	0	0	0	0	1	0	0	0	0	0	0	0	0	0	0	0	0	0	0	0	0	0	0	0	0	0	0	0	0	0	0	0	0	0	0	0
Paromomycin	D010303	Paromomycin	1263-89-4	DTXSID5047829	DTXSID5047829	7	0	0	0	0	0	0	0	0	0	0	0	0	0	0	0	0	0	0	0	0	0	0	0	0	0	0	0	1	0	0	1	0	0	0	0	0	0	0	0	2	0	0	0
potassium bromate	C019536	potassium bromate	7758-01-2	DTXSID6020195	DTXSID6020195	7	0	1	0	0	0	0	0	0	0	0	0	0	0	0	0	0	0	0	0	1	0	0	0	0	0	0	0	1	0	0	1	0	0	0	0	0	0	0	0	3	0	0	0
Prasugrel Hydrochloride	D000068799	Prasugrel Hydrochloride	389574-19-0	DTXSID1049067	DTXSID1049067	7	0	0	0	0	0	0	0	0	0	0	0	0	0	0	0	0	0	0	0	0	0	0	0	0	0	0	0	0	2	0	0	0	0	0	0	0	0	0	0	0	2	0	0
Promazine	D011395	Promazine	58-40-2	DTXSID2023517	DTXSID2023517	7	1	0	0	0	0	0	1	0	0	0	0	0	1	1	0	0	0	0	0	0	0	0	0	0	0	0	0	0	0	0	0	0	1	0	0	0	0	0	0	0	0	0	0
pseudoephedrine, triprolidine drug combination	C006399	pseudoephedrine, triprolidine drug combination	(blank)	DTXSID401009332	DTXSID401009332	7	0	0	0	0	0	0	0	0	6	0	0	0	0	0	0	0	1	0	0	0	0	0	0	0	0	0	0	0	0	0	0	0	0	0	0	0	0	0	0	0	0	0	0
quinapril	C041125	quinapril	82586-55-8	DTXSID3021221	DTXSID3021221	7	0	0	0	0	0	0	0	0	2	0	0	0	0	0	0	0	0	0	0	0	0	0	0	0	0	0	0	0	0	0	0	0	0	0	0	0	4	0	0	0	0	0	0
Ruthenium Red	D012430	Ruthenium Red	11103-72-3	DTXSID80108179	DTXSID80108179	7	2	0	0	0	0	0	0	0	0	0	0	0	0	0	0	0	0	0	0	0	2	0	0	0	0	0	0	0	0	0	0	0	0	0	0	0	0	0	0	0	0	0	0
Salmeterol Xinafoate	D000068299	Salmeterol Xinafoate	94749-08-3	DTXSID1045798	DTXSID1045798	7	0	0	0	0	0	0	0	0	0	3	0	0	0	0	0	0	0	0	0	0	0	0	0	0	0	0	0	0	1	0	0	0	0	0	0	0	0	0	0	0	0	0	0
salsolinol	C036617	salsolinol	38221-21-5	DTXSID60191600	DTXSID60191600	7	0	0	0	0	0	0	3	0	0	0	0	0	0	0	0	0	0	0	0	0	0	0	0	0	0	0	0	0	0	0	0	0	0	0	0	0	0	3	0	0	0	0	0
sodium bromate	C060553	sodium bromate	7789-38-0	DTXSID9023837	DTXSID9023837	7	0	1	0	1	0	0	0	0	0	0	0	0	0	0	0	0	0	0	0	0	0	0	0	0	0	0	0	0	0	0	3	1	0	0	0	0	0	0	0	1	0	0	0
spirogermanium	C026818	spirogermanium	41992-22-7	DTXSID80194799	DTXSID80194799	7	2	3	0	0	0	0	0	0	0	0	0	1	0	1	0	0	0	0	0	0	0	0	0	0	0	0	0	0	0	0	0	0	0	0	0	0	0	0	0	0	0	0	0
Sulfadoxine	D013413	Sulfadoxine	2447-57-6	DTXSID6023608	DTXSID6023608	7	0	0	0	0	0	1	0	0	0	0	0	0	0	0	0	0	0	0	0	0	0	0	0	0	0	0	0	0	0	1	0	0	0	0	0	0	0	0	0	0	0	0	0
Sulfisoxazole	D013444	Sulfisoxazole	6155-81-3	DTXSID10210537	DTXSID10210537	7	0	1	0	0	0	0	0	0	0	0	0	0	0	0	0	0	0	1	0	0	0	0	0	0	0	0	0	0	0	0	0	0	0	0	0	0	0	0	0	0	0	0	0
Sulfur Dioxide	D013458	Sulfur Dioxide	7446-09-5	DTXSID6029672	DTXSID6029672	7	0	0	0	1	0	0	0	0	0	0	0	0	0	0	0	0	0	0	0	0	0	0	0	0	0	0	0	0	1	0	0	0	0	0	0	0	0	0	0	0	0	0	0
Talc	D013627	Talc	14807-96-6	DTXSID5032109	DTXSID5032109	7	0	0	0	0	0	0	0	0	0	0	0	0	0	0	0	0	0	0	0	0	0	0	0	0	0	0	0	0	0	1	0	0	0	0	0	0	0	0	0	0	0	0	0
tizanidine	C023754	tizanidine	64461-82-1	DTXSID9046990	DTXSID9046990	7	1	0	0	0	0	0	0	0	0	0	0	0	1	0	0	0	0	0	0	0	0	0	0	1	0	0	0	0	0	0	0	0	0	0	0	0	0	0	0	0	0	0	0
trans-1,4-Bis(2-chlorobenzaminomethyl)cyclohexane Dihydrochloride	D001371	trans-1,4-Bis(2-chlorobenzaminomethyl)cyclohexane Dihydrochloride	(blank)	DTXSID10957874	DTXSID10957874	7	0	0	0	0	0	0	0	0	0	0	0	0	0	0	0	0	0	0	0	0	0	0	0	0	0	0	0	0	0	0	0	0	0	0	0	0	0	0	0	0	0	0	0
Trypan Blue	D014343	Trypan Blue	72-57-1	DTXSID4026268	DTXSID4026268	7	0	0	0	0	0	0	0	0	0	0	0	0	0	0	0	0	0	0	0	0	0	0	0	0	0	0	0	0	0	0	0	0	0	0	0	0	0	0	0	0	0	0	0
vemurafenib	C551177	vemurafenib	918504-65-1	DTXSID50238710	DTXSID50238710	7	0	0	0	0	0	0	0	0	0	0	0	0	0	0	0	0	0	0	0	0	0	0	0	0	0	0	0	0	0	0	0	0	0	0	0	0	0	0	0	0	0	0	0
VX	C009680	VX	50782-69-9	DTXSID80866161	DTXSID80866161	7	4	0	0	0	0	0	0	0	0	1	0	0	0	0	0	0	0	0	0	0	1	0	0	0	0	0	0	0	0	0	0	0	0	0	0	0	0	0	0	0	0	0	0
xylometazoline	C009695	xylometazoline	526-36-3	DTXSID8046957	DTXSID8046957	7	0	0	0	0	0	0	0	1	1	0	0	0	0	0	0	0	0	0	0	0	0	0	0	0	0	0	0	0	1	0	0	0	0	0	0	0	0	0	0	0	0	0	0
Zinc Oxide	D015034	Zinc Oxide	1314-13-2	DTXSID7035016	DTXSID7035016	7	0	0	0	0	1	0	0	0	0	0	0	0	0	0	3	0	0	0	0	0	0	0	0	0	0	0	0	0	0	0	0	0	0	0	0	0	0	0	0	0	0	0	0
Zinc Sulfate	D019287	Zinc Sulfate	7733-02-0	DTXSID2040315	DTXSID2040315	7	0	0	2	0	0	0	0	0	0	0	0	0	0	0	0	0	0	0	0	0	0	0	0	0	0	0	0	0	0	0	0	1	0	0	0	0	0	0	0	0	0	0	0
1-(3-chlorophenyl)piperazine	C015068	1-(3-chlorophenyl)piperazine	6640-24-0	DTXSID9045138	DTXSID9045138	6	0	0	0	0	0	0	0	0	0	0	0	0	0	0	0	1	1	0	0	0	0	0	0	0	0	0	0	0	0	0	0	0	0	0	0	0	0	0	0	0	0	0	0
1,2,3,4-tetrahydro-1-(phenylmethyl)isoquinoline	C084924	1,2,3,4-tetrahydro-1-(phenylmethyl)isoquinoline	57680-86-1	DTXSID30360922	DTXSID30360922	6	0	0	0	0	0	0	2	0	0	0	0	0	0	0	0	0	0	0	0	0	0	0	0	0	0	0	0	0	0	0	0	0	0	0	0	0	0	2	0	0	0	0	0
2-(2-cresyl)-4H-1-3-2-benzodioxaphosphorin-2-oxide	C000516	2-(2-cresyl)-4H-1-3-2-benzodioxaphosphorin-2-oxide	(blank)	DTXSID00924111	DTXSID00924111	6	1	2	1	0	0	0	0	0	0	1	0	0	0	0	0	0	0	0	0	0	0	0	0	0	0	0	0	0	0	0	0	0	0	0	0	0	0	0	0	0	0	0	0
2,4-Dinitrophenol	D019297	2,4-Dinitrophenol	51-28-5	DTXSID0020523	DTXSID0020523	6	1	0	2	0	1	0	0	0	0	0	0	0	0	0	0	0	0	0	0	0	0	0	0	0	0	0	0	0	0	0	0	1	0	0	0	0	0	0	0	0	0	0	0
4-methyl-N-(3-(4-methylimidazol-1-yl)-5-(trifluoromethyl)phenyl)-3-((4-pyridin-3-ylpyrimidin-2-yl)amino)benzamide	C498826	4-methyl-N-(3-(4-methylimidazol-1-yl)-5-(trifluoromethyl)phenyl)-3-((4-pyridin-3-ylpyrimidin-2-yl)amino)benzamide	641571-10-0	DTXSID5042663	DTXSID5042663	6	0	0	0	0	1	0	0	0	0	0	0	0	0	0	0	0	0	0	0	0	0	0	0	0	0	0	0	0	1	0	0	0	0	0	0	0	0	0	0	0	0	0	0
4-phenylenediamine	C029728	4-phenylenediamine	16245-77-5	DTXSID6066028	DTXSID6066028	6	0	0	0	1	1	0	0	0	0	0	0	0	0	0	1	0	0	0	0	0	1	0	0	0	0	0	0	0	0	0	0	0	0	0	0	0	0	0	0	0	0	0	0
9,10-Dimethyl-1,2-benzanthracene	D015127	9,10-Dimethyl-1,2-benzanthracene	57-97-6	DTXSID1020510	DTXSID1020510	6	0	0	0	0	0	0	0	0	0	0	0	0	0	0	0	0	0	0	0	0	0	0	0	0	0	0	0	0	0	0	0	0	0	0	0	0	0	0	0	0	0	0	0
Acepromazine	D000075	Acepromazine	3598-37-6	DTXSID6047783	DTXSID6047783	6	2	0	0	0	0	0	0	1	0	0	0	0	0	0	0	0	0	0	0	0	0	0	0	0	0	0	0	0	0	0	0	0	0	1	0	0	0	0	0	0	0	0	0
acivicin	C006303	acivicin	42228-92-2	DTXSID0046010	DTXSID0046010	6	0	1	0	1	0	0	0	0	0	0	0	3	0	0	0	0	0	0	0	0	0	0	0	0	0	0	0	1	0	0	0	0	0	0	0	0	0	0	0	0	0	0	0
alfuzosin	C047638	alfuzosin	81403-80-7	DTXSID6048549	DTXSID6048549	6	0	0	0	0	0	0	0	0	0	0	0	0	0	0	0	0	0	0	0	0	0	0	0	0	0	0	0	0	0	0	0	0	0	0	0	0	3	0	0	0	0	0	0
aluminum maltolate	C067527	aluminum maltolate	(blank)	DTXSID601009326	DTXSID601009326	6	0	0	0	0	0	0	0	0	0	0	2	0	0	0	0	0	0	0	0	0	0	0	0	0	0	0	0	0	0	0	0	0	0	0	0	0	0	0	0	0	0	0	0
Amiloride	D000584	Amiloride	17440-83-4	DTXSID80169826	DTXSID80169826	6	0	0	0	0	0	0	0	0	0	0	0	0	0	0	0	0	0	0	0	0	2	0	0	0	0	2	0	0	0	0	0	1	0	0	0	0	0	0	1	0	0	0	0
amyl acetate	C005716	amyl acetate	628-63-7	DTXSID1027263	DTXSID1027263	6	1	0	1	0	0	1	0	0	0	0	0	1	0	0	0	0	0	0	0	0	0	0	0	0	0	0	0	0	0	0	0	0	0	0	0	0	0	0	0	0	0	0	0
anastrozole	C090450	anastrozole	120511-73-1	DTXSID9022607	DTXSID9022607	6	0	0	0	0	0	0	0	0	0	0	2	0	0	0	0	0	0	0	0	0	0	0	0	0	0	0	0	0	0	0	0	0	0	0	0	0	0	0	0	0	0	0	0
apraclonidine	C016986	apraclonidine	66711-21-5	DTXSID1048415	DTXSID1048415	6	0	0	0	0	0	0	0	0	0	0	0	0	0	0	0	0	0	0	0	0	0	0	0	1	0	0	0	0	0	0	0	0	0	1	0	0	0	0	0	0	0	0	0
artemether-lumefantrine combination	C515298	artemether-lumefantrine combination	141204-94-6	DTXSID70894857	DTXSID70894857	6	0	0	0	0	0	0	0	0	0	0	0	0	0	0	0	0	0	0	0	2	0	0	0	0	0	0	0	3	0	0	0	0	0	0	0	0	0	0	0	0	0	0	0
Benzyl Alcohol	D019905	Benzyl Alcohol	100-51-6	DTXSID5020152	DTXSID5020152	6	1	1	0	0	0	0	0	0	0	0	0	1	0	1	0	0	0	0	0	0	0	0	0	0	0	0	0	0	0	0	0	0	0	0	0	0	0	0	0	0	0	0	0
Betahistine	D001621	Betahistine	5579-84-0	DTXSID10204355	DTXSID10204355	6	0	0	0	0	0	0	0	0	1	0	0	0	1	0	0	1	0	0	0	0	0	0	0	0	0	0	0	0	0	0	0	0	0	0	0	0	0	0	0	0	0	0	0
BIA 10-2474	C000612073	BIA 10-2474	(blank)	DTXSID901009325	DTXSID901009325	6	0	1	0	0	0	0	0	0	0	0	1	0	0	1	0	0	0	0	0	0	0	0	0	0	0	0	0	0	0	0	0	0	0	0	0	0	0	0	0	0	0	0	0
bismuth subgallate	C002170	bismuth subgallate	99-26-3	DTXSID3046588	DTXSID3046588	6	0	0	0	1	0	0	1	0	1	0	0	0	0	0	0	0	1	0	0	0	0	0	0	0	0	0	0	0	0	0	0	0	0	0	0	0	0	0	0	0	0	0	0
Butorphanol	D002077	Butorphanol	42408-82-2	DTXSID1022714	DTXSID1022714	6	0	0	0	1	1	0	0	0	0	0	0	0	0	0	0	0	0	1	0	0	0	0	0	0	0	0	0	0	0	0	0	0	0	0	0	0	0	0	0	0	0	0	0
calomel	C015728	calomel	10112-91-1	DTXSID6044351	DTXSID6044351	6	0	0	1	0	0	0	0	0	0	1	0	0	1	0	0	0	0	0	0	0	0	0	0	1	0	0	0	0	0	0	0	0	0	0	0	0	0	0	0	0	0	0	0
Cantharidin	D002193	Cantharidin	56-25-7	DTXSID7041752	DTXSID7041752	6	0	1	1	0	0	0	0	0	0	0	0	0	0	0	0	0	0	0	0	0	1	0	0	0	0	0	0	0	0	0	0	0	0	0	0	0	0	0	0	0	0	0	1
Carbenoxolone	D002229	Carbenoxolone	5697-56-3	DTXSID4022733	DTXSID4022733	6	0	0	0	0	1	0	0	0	0	0	0	0	0	0	0	0	0	0	0	0	1	0	0	0	0	0	0	0	0	0	0	0	0	0	0	0	0	0	0	0	0	0	0
Cefixime	D020682	Cefixime	79350-37-1	DTXSID7022754	DTXSID7022754	6	0	0	0	0	0	0	0	0	0	0	0	0	1	0	0	0	0	0	0	0	0	1	1	0	0	0	0	0	0	0	0	0	0	0	0	0	0	0	0	0	0	0	0
Cephalexin	D002506	Cephalexin	59695-59-9	DTXSID20208400	DTXSID20208400	6	2	1	0	0	0	0	0	0	0	0	0	0	1	0	0	1	0	0	0	0	0	0	0	0	0	0	0	0	0	0	0	0	0	0	0	0	0	0	0	0	0	0	0
chlorhexidine gluconate	C010882	chlorhexidine gluconate	18472-51-0	DTXSID5034519	DTXSID5034519	6	0	0	0	0	0	0	0	0	0	0	0	0	0	0	0	0	0	0	0	0	0	0	0	0	0	0	0	0	0	0	0	0	0	0	0	0	0	0	0	0	0	0	0
Cromolyn Sodium	D004205	Cromolyn Sodium	16110-51-3	DTXSID4022860	DTXSID4022860	6	1	0	0	0	0	0	0	0	1	1	0	0	0	0	0	0	0	0	0	0	0	0	0	0	0	0	0	0	0	0	0	0	0	0	0	0	0	0	0	0	0	0	0
Cyproterone	D003534	Cyproterone	2098-66-0	DTXSID3022873	DTXSID3022873	6	0	0	0	0	0	0	0	0	1	0	0	0	0	0	0	0	0	0	0	0	0	0	0	0	0	0	0	0	0	0	0	0	0	0	1	0	0	0	0	0	0	0	0
desflurane	C053562	desflurane	(blank)	DTXSID80866606	DTXSID80866606	6	0	0	0	0	0	0	0	0	0	0	1	0	2	0	0	0	0	0	1	0	0	0	0	0	0	0	0	0	0	0	0	0	0	0	0	0	0	0	0	0	0	0	0
Diethylhexyl Phthalate	D004051	Diethylhexyl Phthalate	117-81-7	DTXSID5020607	DTXSID5020607	6	0	0	0	0	0	0	0	0	0	1	0	0	0	0	0	0	0	0	0	0	0	0	0	0	0	0	0	0	0	0	0	0	0	0	0	0	0	0	0	0	0	0	0
Dimethoxyphenylethylamine	D004118	Dimethoxyphenylethylamine	120-20-7	DTXSID8059506	DTXSID8059506	6	1	0	0	0	0	0	0	0	1	0	0	0	0	0	0	0	0	0	0	0	0	0	0	0	0	0	0	0	0	0	0	0	0	0	0	0	0	0	0	0	0	0	0
Dipyrone	D004177	Dipyrone	50567-35-6	DTXSID6044143	DTXSID6044143	6	2	0	0	0	0	0	0	1	0	0	0	0	0	1	0	0	0	0	0	0	0	0	0	0	0	0	0	0	0	0	0	0	0	0	0	0	0	0	0	0	0	0	0
Doxazosin	D017292	Doxazosin	77883-43-3	DTXSID5045598	DTXSID5045598	6	0	0	0	0	0	0	0	0	0	0	0	0	0	0	0	0	0	0	0	0	0	0	0	0	0	0	0	0	1	0	0	0	0	0	0	0	3	0	0	0	0	0	0
Edetic Acid	D004492	Edetic Acid	76353-66-7	DTXSID20227212	DTXSID20227212	6	1	0	0	0	0	0	0	0	0	0	0	0	0	0	0	0	0	0	0	0	0	0	0	0	0	1	0	0	0	0	0	0	0	0	0	1	0	0	0	0	0	0	0
Etidocaine	D005041	Etidocaine	36637-18-0	DTXSID1023027	DTXSID1023027	6	6	0	0	0	0	0	0	0	0	0	0	0	0	0	0	0	0	0	0	0	0	0	0	0	0	0	0	0	0	0	0	0	0	0	0	0	0	0	0	0	0	0	0
ferric chloride	C024555	ferric chloride	18497-67-1	DTXSID00171688	DTXSID00171688	6	1	0	0	0	0	0	1	0	0	0	0	0	0	0	0	0	0	0	1	0	0	0	0	0	0	0	0	0	0	0	0	0	0	0	0	0	0	0	0	0	0	0	0
flumequine	C012976	flumequine	42835-25-6	DTXSID5045623	DTXSID5045623	6	2	1	0	1	0	0	0	1	0	0	0	0	0	0	0	0	0	0	0	0	0	0	0	0	0	0	0	0	0	0	0	0	0	0	0	0	0	0	0	0	0	0	0
Flutamide	D005485	Flutamide	13311-84-7	DTXSID7032004	DTXSID7032004	6	0	0	0	0	0	0	0	0	0	0	0	0	0	0	0	0	0	0	0	0	0	0	0	0	0	0	0	0	0	0	0	0	0	0	6	0	0	0	0	0	0	0	0
Fusidic Acid	D005672	Fusidic Acid	751-94-0	DTXSID9045552	DTXSID9045552	6	1	0	1	0	0	0	0	0	0	0	0	0	0	0	0	0	0	0	0	0	0	0	0	0	0	0	0	0	0	0	0	0	1	0	0	0	0	0	0	0	0	0	0
gadodiamide	C064925	gadodiamide	122795-43-1	DTXSID9048647	DTXSID9048647	6	0	0	0	1	0	0	0	0	0	0	0	2	0	0	0	0	1	0	0	0	0	0	0	0	0	0	0	0	0	0	0	0	0	0	0	0	0	0	0	0	0	0	0
Gallium	D005708	Gallium	7440-55-3	DTXSID8064696	DTXSID8064696	6	0	0	0	0	0	0	0	0	0	0	0	0	0	0	0	0	0	0	0	0	1	0	0	0	0	0	0	0	0	1	0	0	0	0	0	0	0	0	0	0	0	0	0
gefitinib	C419708	gefitinib	184475-35-2	DTXSID8041034	DTXSID8041034	6	0	0	0	0	1	0	0	0	0	0	0	0	0	0	1	0	0	0	0	0	0	0	0	0	0	0	0	0	1	0	0	0	0	0	0	0	0	0	0	0	0	0	0
Hydrochloric Acid	D006851	Hydrochloric Acid	7647-01-0	DTXSID2020711	DTXSID2020711	6	0	0	0	1	0	0	0	0	0	0	0	0	0	0	0	0	0	0	0	0	0	0	0	0	2	0	1	0	0	1	0	0	0	0	0	0	0	0	0	0	0	0	0
Ibogaine	D007050	Ibogaine	83-74-9	DTXSID20894069	DTXSID20894069	6	1	0	0	0	0	0	0	0	2	2	0	0	0	0	0	0	0	0	0	0	0	0	0	0	0	1	0	0	0	0	0	0	0	0	0	0	0	0	0	0	0	0	0
iodixanol	C044834	iodixanol	92339-11-2	DTXSID2045523	DTXSID2045523	6	0	0	0	2	0	0	0	0	0	0	0	0	0	0	0	0	0	0	0	0	0	0	0	0	0	0	0	0	0	1	0	0	0	0	0	0	0	0	0	0	0	0	0
iotrolan	C033300	iotrolan	79770-24-4	DTXSID0023165	DTXSID0023165	6	1	0	0	1	0	0	0	0	0	0	0	0	0	0	0	0	0	0	0	0	0	0	0	0	0	0	0	0	0	0	0	0	0	0	0	1	0	0	0	0	0	0	0
Isoproterenol	D007545	Isoproterenol	51-30-9	DTXSID6025486	DTXSID6025486	6	0	0	0	0	0	0	0	0	0	2	0	0	0	0	0	0	0	0	0	0	0	0	0	0	0	0	0	0	0	0	0	0	0	1	0	0	1	0	0	0	0	0	0
Lasalocid	D007832	Lasalocid	25999-31-9	DTXSID9048485	DTXSID9048485	6	0	0	1	0	0	0	0	0	0	0	0	0	0	0	0	0	0	2	0	0	2	0	0	0	0	0	0	0	0	0	0	0	0	0	0	0	0	0	0	0	0	0	0
lormetazepam	C023842	lormetazepam	(blank)	DTXSID40862442	DTXSID40862442	6	0	0	0	0	0	0	0	0	1	0	0	0	0	0	0	0	0	0	0	0	0	0	0	1	0	0	1	0	0	0	0	0	0	0	0	0	0	0	0	0	0	0	0
MDV 3100	C540278	MDV 3100	(blank)	DTXSID10912307	DTXSID10912307	6	2	0	0	0	0	0	0	0	0	0	0	0	0	0	0	0	0	0	0	0	0	0	0	0	0	0	0	0	0	0	0	0	0	0	0	0	0	0	1	0	0	0	0
methyl iodide	C014055	methyl iodide	865-50-9	DTXSID20235599	DTXSID20235599	6	0	0	0	1	0	0	1	0	0	0	0	0	0	0	0	0	0	0	0	0	0	1	0	0	0	0	0	0	0	0	0	0	0	0	0	0	0	0	0	0	0	0	0
Methylprednisolone Hemisuccinate	D008776	Methylprednisolone Hemisuccinate	2921-57-5	DTXSID80183466	DTXSID80183466	6	0	0	0	0	0	0	0	0	0	0	0	0	0	0	0	0	0	0	0	0	0	0	1	0	0	0	0	0	0	0	0	0	0	0	0	0	0	0	0	0	0	0	0
Mevinphos	D008799	Mevinphos	7786-34-7	DTXSID2032683	DTXSID2032683	6	1	0	0	0	0	0	0	0	0	0	0	0	0	0	0	0	0	0	0	0	0	0	0	0	0	0	0	0	0	0	0	1	0	0	0	0	0	0	0	0	0	0	1
Mifepristone	D015735	Mifepristone	84371-65-3	DTXSID5023322	DTXSID5023322	6	0	0	0	0	0	0	0	0	0	0	1	0	0	0	0	0	0	0	0	0	0	0	0	0	0	0	0	0	0	0	0	0	0	0	0	0	0	0	0	0	0	0	0
Mitoguazone	D008935	Mitoguazone	(blank)	DTXSID70861943	DTXSID70861943	6	0	0	1	0	1	0	0	0	0	0	0	1	0	0	1	0	0	0	0	0	0	0	0	0	0	0	0	0	0	0	0	0	0	0	0	0	0	0	0	1	0	0	0
Mitoxantrone	D008942	Mitoxantrone	65271-80-9	DTXSID4046947	DTXSID4046947	6	0	1	0	0	1	0	0	0	0	0	0	0	0	0	0	0	0	0	0	0	0	0	0	0	0	0	0	0	0	0	0	0	0	0	0	0	0	0	0	0	0	0	0
N-benzylpiperazine	C461488	N-benzylpiperazine	2759-28-6	DTXSID0022197	DTXSID0022197	6	1	0	0	0	0	0	0	0	2	0	0	0	0	0	0	0	0	0	0	0	0	0	0	0	0	0	1	0	0	0	0	0	0	0	0	0	0	0	0	0	0	0	0
N-butylbenzenesulfonamide	C065565	N-butylbenzenesulfonamide	3622-84-2	DTXSID7027540	DTXSID7027540	6	0	3	0	0	0	0	0	1	0	0	0	0	0	0	0	0	0	1	0	0	0	0	0	0	0	0	0	0	0	0	0	0	0	0	0	0	0	0	0	0	0	0	0
Nitrofurazone	D009583	Nitrofurazone	59-87-0	DTXSID5020944	DTXSID5020944	6	1	0	0	0	0	0	0	0	0	0	0	1	0	0	0	0	0	0	0	0	3	0	0	0	0	0	0	0	0	0	0	1	0	0	0	0	0	0	0	0	0	0	0
Nitrogen	D009584	Nitrogen	7727-37-9	DTXSID4036304	DTXSID4036304	6	1	0	1	1	0	0	0	0	0	0	0	0	0	0	0	0	0	0	0	0	0	0	0	0	0	0	0	1	0	0	0	0	0	1	0	0	0	0	0	0	0	0	0
norharman	C010262	norharman	7259-44-1	DTXSID30222915	DTXSID30222915	6	0	0	0	0	0	0	3	0	0	0	0	0	0	0	0	0	0	0	0	0	0	0	0	0	0	0	0	0	0	0	0	0	0	0	0	0	0	1	0	0	0	0	0
o-Chlorobenzylidenemalonitrile	D009763	o-Chlorobenzylidenemalonitrile	2698-41-1	DTXSID9020297	DTXSID9020297	6	0	0	0	0	0	0	0	0	0	0	0	0	0	0	0	0	0	0	0	0	0	0	0	0	0	0	0	0	0	0	0	0	0	0	0	0	0	0	0	0	0	0	0
pazopanib	C516667	pazopanib	444731-52-6	DTXSID8048733	DTXSID8048733	6	0	0	0	0	0	0	0	0	1	0	0	0	0	0	0	0	0	0	0	0	0	0	0	0	0	0	0	0	0	0	0	0	0	0	0	0	0	0	0	0	0	0	0
Penicillanic Acid	D010397	Penicillanic Acid	87-53-6	DTXSID90236038	DTXSID90236038	6	1	0	0	0	0	0	0	0	1	0	0	0	1	1	0	0	1	0	0	0	0	1	0	0	0	0	0	0	0	0	0	0	0	0	0	0	0	0	0	0	0	0	0
perampanel	C551441	perampanel	380917-97-5	DTXSID80191501	DTXSID80191501	6	2	0	0	0	0	0	0	0	0	0	0	0	0	0	0	0	0	1	1	0	0	0	0	1	0	0	0	0	0	0	0	0	0	0	0	0	0	0	0	0	0	0	0
Phenacetin	D010615	Phenacetin	62-44-2	DTXSID1021116	DTXSID1021116	6	0	0	0	0	0	0	0	0	0	0	0	0	0	0	0	0	0	1	0	0	0	0	0	0	0	0	0	3	0	0	0	0	0	0	0	0	0	0	0	0	0	0	0
Phenylthiohydantoin	D010669	Phenylthiohydantoin	2010-15-3	DTXSID20879730	DTXSID20879730	6	2	0	0	0	0	0	0	0	0	0	0	0	0	0	0	0	0	0	0	0	0	0	0	0	0	0	0	0	0	0	0	0	0	0	0	0	0	0	1	0	0	0	0
Phosphonoacetic Acid	D010746	Phosphonoacetic Acid	4408-78-0	DTXSID2045107	DTXSID2045107	6	2	0	0	2	0	0	0	0	0	0	0	0	0	0	1	0	0	0	1	0	0	0	0	0	0	0	0	0	0	0	0	0	0	0	0	0	0	0	0	0	0	0	0
Povidone	D011205	Povidone	9003-39-8	DTXSID0025941	DTXSID0025941	6	0	0	0	0	1	0	0	0	0	0	0	0	0	0	0	0	0	0	0	0	0	0	0	0	0	1	0	1	0	0	0	1	0	0	0	0	0	0	0	0	0	0	1
Procarbazine	D011344	Procarbazine	18969-59-0	DTXSID50172382	DTXSID50172382	6	0	1	0	0	0	1	0	0	0	0	0	1	0	0	1	0	0	0	0	0	0	0	0	0	0	0	0	0	0	0	0	0	0	0	0	0	0	0	0	0	0	0	0
Procaterol	D017265	Procaterol	72332-33-3	DTXSID5045673	DTXSID5045673	6	0	0	0	0	0	0	0	0	0	6	0	0	0	0	0	0	0	0	0	0	0	0	0	0	0	0	0	0	0	0	0	0	0	0	0	0	0	0	0	0	0	0	0
Ranolazine	D000069458	Ranolazine	95635-55-5	DTXSID3045196	DTXSID3045196	6	1	1	0	0	2	0	0	0	0	0	0	0	0	0	0	0	0	0	0	0	0	0	0	0	0	0	1	0	0	0	0	0	0	0	0	0	0	0	0	0	0	0	0
Rolipram	D020889	Rolipram	61413-54-5	DTXSID3044124	DTXSID3044124	6	0	0	0	0	0	0	0	0	0	0	0	0	0	1	0	0	0	0	0	0	0	0	0	0	0	0	0	0	0	0	0	0	0	0	0	0	0	0	0	0	0	0	0
Surgicel	C013695	Surgicel	(blank)	DTXSID201009324	DTXSID201009324	6	0	0	0	0	0	0	0	0	0	0	0	0	0	0	0	0	0	0	0	0	0	0	0	0	0	0	0	0	0	0	0	0	0	0	0	0	0	0	0	0	0	0	0
Thiamphenicol	D013839	Thiamphenicol	15318-45-3	DTXSID5021338	DTXSID5021338	6	0	0	0	0	0	0	0	0	0	0	0	0	0	0	2	0	0	0	0	0	0	0	0	0	0	0	0	0	0	0	0	1	0	0	0	0	0	0	0	0	0	0	0
Ticarcillin	D013982	Ticarcillin	4697-14-7	DTXSID8045561	DTXSID8045561	6	0	0	0	0	0	0	0	0	1	0	0	0	0	0	0	0	1	0	0	0	0	0	0	0	0	0	0	0	0	0	1	0	1	1	0	0	0	0	0	0	0	0	0
titanium dioxide	C009495	titanium dioxide	1317-70-0	DTXSID9050432	DTXSID9050432	6	0	2	0	1	0	0	0	0	0	0	1	0	0	0	0	0	0	0	0	0	0	0	0	0	0	0	0	0	0	0	0	0	0	0	0	0	0	1	0	0	0	0	0
Tolbutamide	D014044	Tolbutamide	64-77-7	DTXSID8021359	DTXSID8021359	6	0	0	0	0	0	0	1	3	0	0	0	0	0	0	0	0	0	0	0	0	0	0	0	0	0	0	0	0	0	0	0	0	0	0	0	0	0	0	1	0	0	0	0
triamcinolone hexacetonide	C005900	triamcinolone hexacetonide	5611-51-8	DTXSID0048634	DTXSID0048634	6	0	0	0	0	0	0	0	0	1	0	0	0	0	0	0	0	0	0	0	0	0	0	0	0	0	0	0	0	0	0	0	0	0	0	0	0	0	0	0	0	0	0	0
triethylamine	C016162	triethylamine	5204-74-0	DTXSID5063736	DTXSID5063736	6	0	0	0	0	0	0	0	0	0	0	0	0	0	0	0	0	0	0	0	0	0	0	0	0	0	0	0	0	0	0	0	0	0	0	0	0	0	0	0	0	0	0	0
trimethyltin chloride	C040533	trimethyltin chloride	1066-45-1	DTXSID6042496	DTXSID6042496	6	0	3	0	0	0	0	0	0	0	1	0	0	0	0	0	0	0	0	0	0	0	0	0	0	0	0	0	1	0	0	0	0	0	0	0	0	0	0	0	0	0	0	0
trimethyltin hydroxide	C037718	trimethyltin hydroxide	56-24-6	DTXSID9032240	DTXSID9032240	6	1	0	0	2	0	0	0	0	0	1	1	0	0	0	0	0	0	0	0	0	0	0	0	0	0	1	0	0	0	0	0	0	0	0	0	0	0	0	0	0	0	0	0
Trimipramine	D014299	Trimipramine	509-87-5	DTXSID70198928	DTXSID70198928	6	4	0	0	0	0	0	0	0	0	0	0	0	0	0	0	0	0	0	0	0	0	0	0	0	0	1	0	0	0	0	0	0	0	0	0	0	0	0	0	0	0	0	0
Tromethamine	D014325	Tromethamine	1185-53-1	DTXSID4044373	DTXSID4044373	6	0	0	0	1	0	0	0	0	0	0	0	0	0	0	0	1	0	1	0	0	1	0	0	0	0	0	0	0	0	0	1	0	0	0	0	0	0	0	0	0	0	0	0
Tropicamide	D014331	Tropicamide	92934-64-0	DTXSID60276365	DTXSID60276365	6	1	1	0	0	0	0	0	0	1	0	0	0	0	1	0	0	0	0	0	0	0	0	0	0	0	0	0	0	0	0	0	0	0	0	0	0	0	0	0	0	0	0	0
valnoctamide	C045179	valnoctamide	(blank)	DTXSID40863333	DTXSID40863333	6	0	0	0	0	0	0	0	2	0	0	0	0	0	0	0	0	0	0	0	0	0	0	1	0	0	0	0	0	0	0	0	0	0	0	0	0	0	0	0	0	0	0	0
Veratridine	D014701	Veratridine	71-62-5	DTXSID2058467	DTXSID2058467	6	2	0	0	1	0	0	0	0	0	0	0	0	0	0	0	0	0	0	0	0	1	0	1	0	0	0	0	0	0	0	0	0	0	0	0	0	0	0	0	0	0	0	0
(1-pentyl-1H-indol-3-yl)(2,2,3,3-tetramethylcyclopropyl)methanone	C586710	(1-pentyl-1H-indol-3-yl)(2,2,3,3-tetramethylcyclopropyl)methanone	1199943-44-6	DTXSID60152635	DTXSID60152635	5	1	0	0	0	0	0	0	0	1	0	0	0	0	0	0	0	0	0	0	0	0	0	0	0	0	0	0	0	0	0	0	0	0	1	0	0	0	0	0	0	0	0	0
1-(3-trifluoromethylphenyl)piperazine	C018406	1-(3-trifluoromethylphenyl)piperazine	15532-75-9	DTXSID10165876	DTXSID10165876	5	1	0	0	0	0	0	0	0	1	0	0	0	0	0	0	0	0	0	0	0	0	0	0	0	0	0	1	0	0	0	0	0	0	0	0	0	0	0	0	0	0	0	0
1,2-diacetylbenzene	C048792	1,2-diacetylbenzene	704-00-7	DTXSID20220667	DTXSID20220667	5	0	3	0	0	0	0	0	0	0	0	0	1	0	0	0	0	0	0	0	0	0	0	0	0	0	0	0	0	0	0	0	0	0	0	0	0	0	0	0	0	0	0	0
1,3-butadiene	C031763	1,3-butadiene	106-99-0	DTXSID3020203	DTXSID3020203	5	0	0	0	0	0	0	0	0	0	0	0	1	0	0	0	0	0	0	0	0	0	0	0	0	0	0	0	0	0	0	0	0	0	0	0	0	0	0	0	0	0	0	0
1-methyl-1,2,3,4-tetrahydroisoquinoline	C050386	1-methyl-1,2,3,4-tetrahydroisoquinoline	4965-09-7	DTXSID70897161	DTXSID70897161	5	0	0	0	0	0	0	1	0	0	0	0	0	0	0	0	0	0	0	0	0	0	0	0	0	0	0	0	0	0	0	0	0	0	0	0	0	0	2	0	0	0	0	0
4-methylimidazole	C023439	4-methylimidazole	822-36-6	DTXSID9025617	DTXSID9025617	5	2	1	0	0	0	0	0	0	0	1	0	0	0	0	0	0	0	1	0	0	0	0	0	0	0	0	0	0	0	0	0	0	0	0	0	0	0	0	0	0	0	0	0
5-methoxy-N,N-diisopropyltryptamine	C033696	5-methoxy-N,N-diisopropyltryptamine	4021-34-5	DTXSID00193209	DTXSID00193209	5	0	0	0	0	0	0	0	0	1	0	0	0	0	0	1	0	0	0	0	0	0	0	0	0	0	0	0	0	0	0	0	0	0	0	0	0	0	0	0	0	0	0	0
5-Methoxytryptamine	D008735	5-Methoxytryptamine	608-07-1	DTXSID60209638	DTXSID60209638	5	0	0	0	0	0	0	0	0	1	0	0	0	0	0	1	0	0	0	0	0	0	0	0	0	0	0	0	0	0	0	0	0	0	0	0	0	0	0	0	0	0	0	0
9-fluoroprednisolone	C010958	9-fluoroprednisolone	(blank)	DTXSID101009333	DTXSID101009333	5	0	0	0	0	3	0	0	0	0	0	0	0	0	0	0	0	0	0	0	0	1	0	0	0	0	0	0	0	0	0	0	0	0	0	0	0	0	0	0	0	0	0	0
abamectin	C048324	abamectin	71751-41-2	DTXSID8023892	DTXSID8023892	5	0	1	0	0	0	0	0	2	0	0	0	0	0	0	0	0	0	1	0	0	0	1	0	0	0	0	0	0	0	0	0	0	0	0	0	0	0	0	0	0	0	0	0
Acebutolol	D000070	Acebutolol	37517-30-9	DTXSID2048539	DTXSID2048539	5	0	0	0	0	0	0	0	0	0	0	0	0	0	0	1	0	0	0	0	0	0	0	0	0	0	0	1	0	0	0	0	0	0	0	0	0	1	0	0	0	0	0	0
Adamantane	D000218	Adamantane	281-23-2	DTXSID5022017	DTXSID5022017	5	1	1	0	0	0	0	0	0	1	0	0	0	0	0	0	0	0	0	0	0	0	0	0	0	0	0	0	0	0	0	0	0	0	0	0	0	0	0	0	0	0	0	0
Adenosine Triphosphate	D000255	Adenosine Triphosphate	1476-84-2	DTXSID30163753	DTXSID30163753	5	0	0	0	0	0	0	0	0	0	0	0	0	0	0	0	0	0	0	0	0	0	0	0	0	3	0	0	0	0	0	0	0	0	0	0	0	0	0	0	1	0	0	0
Aldrin	D000452	Aldrin	465-73-6	DTXSID7042065	DTXSID7042065	5	5	0	0	0	0	0	0	0	0	0	0	0	0	0	0	0	0	0	0	0	0	0	0	0	0	0	0	0	0	0	0	0	0	0	0	0	0	0	0	0	0	0	0
aliskiren	C446481	aliskiren	173399-03-6	DTXSID3049045	DTXSID3049045	5	0	0	0	0	0	0	0	0	0	0	0	0	0	0	0	0	0	0	0	0	0	0	0	0	0	0	0	0	4	0	0	0	0	0	0	0	0	0	0	0	0	0	0
Amifostine	D004999	Amifostine	63717-27-1	DTXSID70213140	DTXSID70213140	5	0	1	0	0	0	0	0	0	0	0	0	0	0	0	0	0	0	0	0	3	0	0	0	0	0	0	0	0	0	0	1	0	0	0	0	0	0	0	0	0	0	0	0
Anisomycin	D000841	Anisomycin	22862-76-6	DTXSID5040966	DTXSID5040966	5	0	0	0	0	0	0	0	0	0	0	1	0	0	0	0	0	0	0	0	0	0	0	0	0	0	0	0	0	0	0	0	0	0	0	0	0	0	0	0	0	0	3	0
Antimony	D000965	Antimony	7440-36-0	DTXSID5023879	DTXSID5023879	5	0	1	0	0	0	0	0	0	0	1	0	0	0	0	0	0	0	0	0	0	0	0	0	1	0	0	0	0	0	0	0	0	0	0	0	0	0	0	0	0	0	0	0
argatroban	C031942	argatroban	141396-28-3	DTXSID5057888	DTXSID5057888	5	0	0	0	0	0	0	0	0	0	0	0	0	0	4	0	0	0	0	0	0	0	0	0	0	0	0	0	0	0	0	0	0	0	0	0	0	0	0	0	0	0	0	0
aurotioprol	C013394	aurotioprol	(blank)	DTXSID60912312	DTXSID60912312	5	0	0	0	0	0	0	0	0	0	0	0	0	0	0	0	0	1	0	0	0	0	0	0	0	0	0	0	0	0	0	0	0	0	0	0	0	0	0	0	0	0	0	0
avermectin	C019264	avermectin	65195-51-9	DTXSID8058613	DTXSID8058613	5	0	0	0	0	0	0	0	1	0	0	0	1	0	0	0	0	1	0	0	0	0	0	0	0	0	0	0	0	0	0	0	1	0	0	0	0	0	0	0	0	0	0	0
Azauridine	D001380	Azauridine	(blank)	DTXSID20960091	DTXSID20960091	5	0	1	0	1	0	0	0	1	0	0	0	1	0	0	0	0	0	0	0	0	0	0	0	0	0	0	0	0	0	0	0	0	0	0	0	0	0	0	0	0	0	0	0
barium nitrate	C023545	barium nitrate	10022-31-8	DTXSID8049200	DTXSID8049200	5	1	0	0	0	0	0	0	0	0	0	0	0	0	0	0	0	0	0	0	0	0	0	0	0	0	0	0	0	0	0	0	0	0	0	0	0	0	0	0	0	0	0	0
Barium Sulfate	D001466	Barium Sulfate	7727-43-7	DTXSID0050471	DTXSID0050471	5	1	0	0	2	0	0	0	0	0	0	0	0	0	0	0	0	0	0	0	0	0	0	0	1	0	0	0	0	0	0	0	0	0	0	0	0	0	0	0	0	0	0	0
benzoylecgonine	C005618	benzoylecgonine	60305-56-8	DTXSID20291059	DTXSID20291059	5	1	0	0	0	0	0	0	1	0	0	0	0	0	1	0	0	0	0	0	0	0	0	0	0	0	0	0	0	0	0	0	0	0	0	0	0	0	0	0	0	0	0	0
beta-fluoroethylacetate	C067837	beta-fluoroethylacetate	462-26-0	DTXSID40196759	DTXSID40196759	5	0	0	0	0	0	0	0	1	0	0	0	0	0	0	0	0	0	0	0	0	0	0	0	0	0	0	0	0	0	0	0	0	0	0	0	0	0	0	0	0	0	0	0
bifenthrin	C099952	bifenthrin	82657-04-3	DTXSID9020160	DTXSID9020160	5	0	0	0	0	0	0	0	1	0	2	0	0	0	0	0	0	0	0	0	0	0	0	1	0	0	1	0	0	0	0	0	0	0	0	0	0	0	0	0	0	0	0	0
Bisoprolol	D017298	Bisoprolol	66722-44-9	DTXSID6022682	DTXSID6022682	5	0	0	0	0	0	0	0	0	0	1	0	0	0	0	0	0	0	0	0	0	0	0	0	1	0	0	0	0	1	0	0	0	0	1	0	0	0	0	0	0	0	0	0
blonanserin	C079310	blonanserin	132810-10-7	DTXSID7048790	DTXSID7048790	5	0	0	0	0	0	1	0	0	0	0	0	0	0	0	0	0	0	0	0	0	0	0	0	0	0	0	0	0	0	0	0	0	0	0	0	0	0	0	0	0	0	0	0
Brompheniramine	D001977	Brompheniramine	980-71-2	DTXSID2052657	DTXSID2052657	5	0	0	0	1	0	0	0	0	0	0	0	0	0	0	0	1	0	0	0	0	0	0	0	0	0	0	1	0	0	0	0	0	0	0	0	0	0	0	0	0	0	0	0
butyl phosphorotrithioate	C006863	butyl phosphorotrithioate	78-48-8	DTXSID1024174	DTXSID1024174	5	0	2	0	0	0	0	0	0	0	0	0	0	0	0	0	0	0	2	0	0	1	0	0	0	0	0	0	0	0	0	0	0	0	0	0	0	0	0	0	0	0	0	0
calcium carbide	C006873	calcium carbide	75-20-7	DTXSID4026399	DTXSID4026399	5	1	0	0	0	0	0	0	1	0	0	0	0	1	0	0	0	0	0	0	0	0	0	0	0	0	0	0	0	0	1	0	0	0	0	0	0	0	0	0	0	0	0	0
calcium heparin	C006871	calcium heparin	(blank)	DTXSID801009334	DTXSID801009334	5	0	0	0	0	4	0	0	0	0	0	0	0	0	1	0	0	0	0	0	0	0	0	0	0	0	0	0	0	0	0	0	0	0	0	0	0	0	0	0	0	0	0	0
carvedilol	C043211	carvedilol	95093-99-5	DTXSID90241748	DTXSID90241748	5	1	0	0	0	0	0	0	0	0	0	0	0	0	0	0	0	0	0	0	0	0	0	0	0	0	0	0	0	0	0	0	0	0	0	0	0	2	0	0	0	0	0	0
cefditoren pivoxil	C057710	cefditoren pivoxil	117467-28-4	DTXSID2048743	DTXSID2048743	5	1	0	0	0	1	0	0	0	0	0	0	0	0	0	0	0	0	0	0	0	0	0	0	0	0	0	0	0	0	0	0	0	0	0	0	0	0	0	0	0	0	0	0
Cephaloridine	D002509	Cephaloridine	50-59-9	DTXSID9022782	DTXSID9022782	5	2	0	0	2	0	0	1	0	0	0	0	0	0	0	0	0	0	0	0	0	0	0	0	0	0	0	0	0	0	0	0	0	0	0	0	0	0	0	0	0	0	0	0
chloroacetic acid	C006972	chloroacetic acid	79-11-8	DTXSID4020901	DTXSID4020901	5	1	0	0	0	0	0	0	2	0	0	0	0	0	0	0	0	0	0	0	0	0	0	0	0	0	0	0	0	0	0	0	0	0	0	0	1	0	0	0	0	0	0	0
Cholesterol	D002784	Cholesterol	57-88-5	DTXSID3022401	DTXSID3022401	5	0	0	0	0	0	0	0	0	0	0	0	0	0	0	0	0	0	0	0	0	0	0	0	0	0	0	0	0	0	0	0	0	0	0	0	0	0	0	0	0	0	0	0
ciprofibrate	C019304	ciprofibrate	52214-84-3	DTXSID8020331	DTXSID8020331	5	0	0	0	0	3	0	0	0	0	0	0	0	0	0	0	0	0	0	0	0	0	0	0	0	0	0	0	0	0	0	0	0	0	1	0	0	0	0	0	0	0	0	0
clothiapine	C084602	clothiapine	2058-52-8	DTXSID5022851	DTXSID5022851	5	0	0	0	0	0	0	0	0	0	0	0	0	0	0	0	1	0	0	0	0	0	0	0	0	0	0	0	0	0	0	0	0	0	0	0	0	0	1	0	0	0	0	0
Cloxacillin	D003023	Cloxacillin	61-72-3	DTXSID5022853	DTXSID5022853	5	2	0	0	0	0	0	0	0	0	0	0	0	0	0	0	0	1	0	0	1	0	0	0	0	0	0	0	0	0	0	0	0	0	0	0	0	0	0	0	0	0	0	0
Copper Sulfate	D019327	Copper Sulfate	7758-98-7	DTXSID6034479	DTXSID6034479	5	0	0	0	0	0	0	0	0	0	0	2	0	0	0	0	0	0	0	0	0	0	0	0	0	0	0	0	0	0	0	0	0	0	0	0	0	0	0	0	0	0	0	0
cremophor EL	C000515	cremophor EL	61791-12-6	DTXSID2047696	DTXSID2047696	5	1	2	0	0	0	0	0	0	0	0	0	0	0	0	0	0	0	0	0	0	0	0	0	0	0	0	0	0	0	0	0	0	0	0	0	0	0	0	0	0	0	0	0
Darunavir	D000069454	Darunavir	206361-99-1	DTXSID0046779	DTXSID0046779	5	0	1	0	0	0	0	0	0	0	0	0	1	0	0	0	0	0	0	0	0	0	0	0	0	0	0	0	0	0	0	0	1	0	0	0	0	0	0	0	0	0	0	0
Diethylpropion	D004053	Diethylpropion	90-84-6	DTXSID6022929	DTXSID6022929	5	0	0	0	0	0	0	0	0	1	0	0	0	0	0	0	0	0	0	0	0	0	0	0	0	0	0	2	0	0	0	0	0	0	0	0	0	0	0	0	0	0	0	0
dimethoxon	C002302	dimethoxon	1113-02-6	DTXSID4037580	DTXSID4037580	5	0	1	1	0	0	0	0	0	0	0	0	0	0	0	0	0	0	0	0	0	0	0	0	0	0	0	0	0	0	0	0	0	0	0	0	1	0	0	0	0	0	0	0
Diminazene	D004133	Diminazene	536-71-0	DTXSID7043792	DTXSID7043792	5	0	0	0	1	0	0	0	0	0	1	0	0	0	0	0	0	0	1	0	0	1	0	0	0	0	0	0	0	0	0	0	1	0	0	0	0	0	0	0	0	0	0	0
diphenyldiselenide	C061132	diphenyldiselenide	1666-13-3	DTXSID6061864	DTXSID6061864	5	5	0	0	0	0	0	0	0	0	0	0	0	0	0	0	0	0	0	0	0	0	0	0	0	0	0	0	0	0	0	0	0	0	0	0	0	0	0	0	0	0	0	0
distigmine	C084645	distigmine	17299-00-2	DTXSID00169484	DTXSID00169484	5	0	0	0	0	0	0	1	0	0	0	0	0	0	0	0	0	0	0	0	0	0	0	0	0	0	0	0	0	0	0	0	0	0	0	0	0	0	0	0	0	0	0	0
DSP 4	C012102	DSP 4	62078-98-2	DTXSID50211124	DTXSID50211124	5	0	1	0	0	0	0	0	0	0	0	1	0	0	0	0	0	0	0	0	0	0	0	0	0	0	0	0	0	0	0	0	0	0	0	0	0	0	1	0	0	0	0	0
Durapatite	D017886	Durapatite	1306-06-5	DTXSID10872538	DTXSID10872538	5	0	0	0	0	0	0	0	0	0	0	0	0	0	0	0	0	0	0	0	0	0	0	0	0	0	0	0	0	0	1	0	0	0	0	0	0	0	0	0	0	0	0	0
enprofylline	C034347	enprofylline	41078-02-8	DTXSID9045186	DTXSID9045186	5	1	0	0	0	0	0	0	0	0	3	0	0	0	0	0	0	0	0	0	0	0	0	0	1	0	0	0	0	0	0	0	0	0	0	0	0	0	0	0	0	0	0	0
epothilone B	C093788	epothilone B	152044-54-7	DTXSID4046862	DTXSID4046862	5	0	0	4	0	0	0	0	0	0	0	0	0	0	0	0	0	0	0	0	0	0	0	0	0	0	0	0	0	0	0	0	0	0	0	0	0	0	0	0	0	0	0	0
Esomeprazole	D064098	Esomeprazole	161796-84-5	DTXSID20167240	DTXSID20167240	5	0	0	0	0	1	0	0	0	0	0	0	0	0	0	0	0	0	0	0	0	0	1	0	0	0	0	0	0	0	0	0	0	0	0	0	0	0	0	0	0	0	0	0
Ethylmercuric Chloride	D005034	Ethylmercuric Chloride	107-27-7	DTXSID9042128	DTXSID9042128	5	0	1	0	1	0	0	0	0	0	0	1	0	0	0	0	0	0	0	0	0	0	0	0	1	0	0	0	0	0	0	0	0	0	0	0	0	0	0	0	0	0	0	0
exemestane	C056516	exemestane	107868-30-4	DTXSID5023037	DTXSID5023037	5	0	0	0	0	0	0	0	0	0	0	0	0	0	0	0	0	0	0	0	0	0	0	0	0	0	0	0	0	0	0	0	0	0	0	0	0	0	0	0	0	0	0	0
fanasil, pyrimethamine drug combination	C001205	fanasil, pyrimethamine drug combination	37338-39-9	DTXSID70190780	DTXSID70190780	5	0	0	0	0	0	0	0	0	0	0	0	0	0	0	0	0	0	0	0	0	0	0	0	0	0	0	0	0	0	1	0	0	0	0	0	0	0	0	0	0	0	0	0
Fleroxacin	D016576	Fleroxacin	79660-72-3	DTXSID1046714	DTXSID1046714	5	0	0	0	0	0	0	0	0	0	0	0	0	0	0	0	0	0	0	0	0	0	0	0	1	0	0	3	0	0	0	0	0	0	0	0	0	0	0	0	0	0	0	0
fomepizole	C010238	fomepizole	7554-65-6	DTXSID3040649	DTXSID3040649	5	1	0	0	0	0	0	0	1	0	0	0	0	0	0	0	0	0	0	0	0	0	0	0	0	0	0	0	0	0	0	0	0	0	0	0	0	0	0	0	0	0	0	0
fomocain	C100275	fomocain	56583-43-8	DTXSID80205137	DTXSID80205137	5	0	0	0	0	0	0	0	0	0	0	0	0	0	0	0	0	0	0	0	0	5	0	0	0	0	0	0	0	0	0	0	0	0	0	0	0	0	0	0	0	0	0	0
Fumitremorgin A	C024743	Fumitremorgin A	(blank)	DTXSID30925479	DTXSID30925479	5	3	0	0	0	0	0	0	0	0	2	0	0	0	0	0	0	0	0	0	0	0	0	0	0	0	0	0	0	0	0	0	0	0	0	0	0	0	0	0	0	0	0	0
Gentian Violet	D005840	Gentian Violet	8004-87-3	DTXSID8046666	DTXSID8046666	5	0	0	0	0	0	0	0	0	0	0	0	0	0	0	0	0	0	0	0	0	0	0	0	0	0	0	0	0	0	0	0	0	0	0	0	0	0	0	0	0	0	0	0
Glucosamine	D005944	Glucosamine	3416-24-8	DTXSID4023098	DTXSID4023098	5	0	0	1	0	0	0	0	0	0	0	0	0	0	0	0	0	0	0	0	0	0	0	0	0	0	0	0	0	0	0	0	0	0	0	0	0	0	0	0	0	0	0	0
Gossypol	D006072	Gossypol	303-45-7	DTXSID5023110	DTXSID5023110	5	0	0	0	0	0	0	0	0	0	0	0	0	0	0	0	0	0	0	0	0	4	0	0	0	0	0	0	0	0	0	0	0	0	0	0	0	0	0	0	0	0	0	0
guanidinosuccinic acid	C001318	guanidinosuccinic acid	(blank)	DTXSID80863695	DTXSID80863695	5	4	0	0	0	0	0	0	0	0	0	0	0	0	0	0	0	0	0	1	0	0	0	0	0	0	0	0	0	0	0	0	0	0	0	0	0	0	0	0	0	0	0	0
Heptachlor	D006533	Heptachlor	76-44-8	DTXSID3020679	DTXSID3020679	5	0	0	1	0	0	0	0	0	0	1	0	0	0	0	0	0	0	0	0	0	0	0	0	0	0	0	0	0	0	0	0	0	0	0	0	0	0	1	0	0	0	0	0
Hydroxocobalamin	D006879	Hydroxocobalamin	13422-51-0	DTXSID60897433	DTXSID60897433	5	1	0	0	0	0	0	0	0	0	1	0	0	0	0	0	0	1	0	0	0	0	0	0	0	0	0	0	0	0	0	0	0	0	2	0	0	0	0	0	0	0	0	0
imidacloprid	C082359	imidacloprid	138261-41-3	DTXSID5032442	DTXSID5032442	5	0	0	0	0	0	0	0	1	0	0	1	0	2	0	0	0	0	0	0	0	0	0	0	0	0	0	0	0	0	0	0	0	0	0	0	0	0	0	0	0	0	0	0
Indapamide	D007190	Indapamide	26807-65-8	DTXSID7044633	DTXSID7044633	5	0	0	0	0	0	0	0	0	0	0	0	0	0	0	0	0	0	0	0	0	0	0	0	0	0	0	0	0	0	0	0	0	0	1	0	0	0	0	0	0	0	0	0
Indoramin	D007217	Indoramin	26844-12-2	DTXSID7048370	DTXSID7048370	5	0	0	0	0	0	0	0	0	0	0	0	0	0	0	0	0	0	0	0	0	0	0	0	1	0	0	0	0	0	0	0	0	0	2	0	0	1	0	0	0	0	0	0
intetrix	C037666	intetrix	87453-65-4	DTXSID00236347	DTXSID00236347	5	0	1	0	0	0	0	0	0	0	0	0	0	0	0	0	0	0	0	0	0	0	0	0	0	0	0	0	0	0	0	0	0	0	0	0	0	0	0	0	0	0	0	0
Ketorolac	D020910	Ketorolac	74103-06-3	DTXSID8023189	DTXSID8023189	5	0	0	0	0	0	0	0	0	0	0	0	0	0	0	0	0	0	1	0	0	0	0	0	0	0	0	0	0	0	0	1	0	0	0	0	0	0	0	0	0	1	0	0
Ketotifen	D007665	Ketotifen	34580-13-7	DTXSID7023190	DTXSID7023190	5	1	0	0	0	0	0	0	0	0	0	0	0	0	0	0	0	0	0	1	0	0	0	0	0	0	0	0	0	0	0	0	0	0	0	0	0	0	0	0	0	0	0	0
LDE225	C561435	LDE225	(blank)	DTXSID501009335	DTXSID501009335	5	0	0	0	0	1	0	0	0	0	0	0	0	0	0	0	0	0	0	0	0	0	0	0	0	0	0	0	0	0	0	0	0	0	0	0	0	0	0	0	0	0	0	0
letrozole	C067431	letrozole	112809-51-5	DTXSID4023202	DTXSID4023202	5	0	0	0	0	0	1	0	0	0	0	0	0	0	0	0	0	0	0	0	0	0	0	0	0	0	0	0	0	0	0	0	0	0	0	0	0	0	0	0	0	0	0	0
Leucovorin	D002955	Leucovorin	73951-54-9	DTXSID10224654	DTXSID10224654	5	1	0	0	1	0	0	0	1	0	0	0	1	0	0	0	0	0	0	0	0	0	0	0	0	0	0	0	0	0	0	0	0	0	0	0	0	0	0	0	0	0	0	0
levosulpiride	C078143	levosulpiride	23672-07-3	DTXSID0042583	DTXSID0042583	5	0	0	0	0	0	1	1	0	0	3	0	0	0	0	0	0	0	0	0	0	0	0	0	0	0	0	0	0	0	0	0	0	0	0	0	0	0	0	0	0	0	0	0
Lincomycin	D008034	Lincomycin	859-18-7	DTXSID7047803	DTXSID7047803	5	0	0	0	0	0	0	0	0	0	0	0	0	0	0	0	0	0	0	0	0	2	0	0	0	0	0	0	1	0	0	0	1	0	0	0	0	0	0	0	0	0	0	0
liposomal amphotericin B	C068538	liposomal amphotericin B	1397-89-3	DTXSID9022601	DTXSID9022601	5	0	0	0	0	0	0	0	0	0	1	1	0	0	0	0	0	1	0	0	0	0	1	0	0	0	0	0	0	0	0	0	0	0	0	0	0	0	0	0	0	0	0	0
Lisdexamfetamine Dimesylate	D000069478	Lisdexamfetamine Dimesylate	608137-33-3	DTXSID60209653	DTXSID60209653	5	0	0	0	0	0	0	0	0	0	0	0	0	0	0	0	0	0	0	0	0	0	0	0	0	0	0	4	0	0	0	0	0	0	0	0	0	0	0	0	0	0	0	0
malaoxon	C100082	malaoxon	1634-78-2	DTXSID9020790	DTXSID9020790	5	4	0	0	1	0	0	0	0	0	0	0	0	0	0	0	0	0	0	0	0	0	0	0	0	0	0	0	0	0	0	0	0	0	0	0	0	0	0	0	0	0	0	0
Medetomidine	D020926	Medetomidine	86347-14-0	DTXSID6048258	DTXSID6048258	5	1	0	0	0	0	0	0	0	0	0	1	0	0	0	0	0	0	1	0	0	0	0	0	1	0	0	0	0	0	0	0	0	0	0	0	0	0	0	0	0	0	0	0
Methoxsalen	D008730	Methoxsalen	298-81-7	DTXSID8020830	DTXSID8020830	5	0	0	0	0	0	0	0	0	0	0	0	0	0	0	0	0	0	0	0	0	0	0	0	2	0	0	0	0	0	0	0	0	0	0	0	0	0	0	0	0	0	0	0
methyl isobutyl ketone	C005458	methyl isobutyl ketone	108-10-1	DTXSID5021889	DTXSID5021889	5	0	2	0	0	0	0	0	0	0	0	0	0	0	0	0	0	0	1	0	0	1	0	0	0	0	0	0	0	0	0	0	0	0	0	0	0	0	0	0	0	0	1	0
Midrin	C008527	Midrin	(blank)	DTXSID601009338	DTXSID601009338	5	0	0	0	0	0	0	0	0	0	0	0	0	0	2	0	0	0	0	0	0	0	0	0	0	0	0	0	0	0	0	0	0	0	0	0	0	0	0	0	0	0	0	0
morphine-6-glucuronide	C035349	morphine-6-glucuronide	20290-10-2	DTXSID40174158	DTXSID40174158	5	1	0	0	0	0	0	0	0	0	0	0	0	0	0	0	0	2	0	0	0	0	1	0	0	1	0	0	0	0	0	0	0	0	0	0	0	0	0	0	0	0	0	0
Moxalactam	D009070	Moxalactam	64952-97-2	DTXSID9023338	DTXSID9023338	5	2	0	0	1	0	0	0	0	0	0	0	0	0	0	0	0	1	0	0	0	0	0	0	0	0	0	0	1	0	0	0	0	0	0	0	0	0	0	0	0	0	0	0
Nafronyl	D009257	Nafronyl	31329-57-4	DTXSID3023344	DTXSID3023344	5	2	0	0	0	0	0	0	0	0	0	0	0	0	0	0	0	0	0	1	0	0	0	1	0	0	1	0	0	0	0	0	0	0	0	0	0	0	0	0	0	0	0	0
naphthalene	C031721	naphthalene	91-20-3	DTXSID8020913	DTXSID8020913	5	0	0	1	1	0	0	0	0	0	0	0	0	0	0	0	0	0	0	0	0	0	0	0	0	0	0	0	0	0	0	0	0	0	0	0	0	0	0	0	0	0	0	0
Nefopam	D009340	Nefopam	13669-70-0	DTXSID2048535	DTXSID2048535	5	2	0	0	0	0	0	0	0	0	0	0	0	1	0	0	0	0	0	0	0	0	0	0	0	0	0	0	0	0	1	0	0	0	0	0	0	0	0	0	0	0	0	0
n-heptane	C028618	n-heptane	142-82-5	DTXSID6024127	DTXSID6024127	5	0	1	3	0	0	0	0	0	0	0	0	0	0	0	0	0	0	0	0	0	0	0	0	0	0	0	0	0	0	0	0	0	0	0	0	0	0	0	0	0	0	0	1
Nialamide	D009526	Nialamide	51-12-7	DTXSID1023362	DTXSID1023362	5	0	0	0	0	0	0	0	0	1	1	0	0	0	0	0	0	0	0	0	0	0	0	0	0	0	0	0	0	0	0	0	1	0	0	0	0	0	0	0	1	0	0	0
Nicorandil	D020108	Nicorandil	65141-46-0	DTXSID8045692	DTXSID8045692	5	0	0	0	0	0	0	0	0	0	0	0	0	0	0	0	0	0	0	0	0	0	0	0	0	0	0	0	0	0	0	0	0	0	0	0	0	0	0	0	0	0	0	0
nilutamide	C021277	nilutamide	63612-50-0	DTXSID3034165	DTXSID3034165	5	0	0	0	0	0	0	0	0	0	0	0	0	0	0	0	0	0	0	0	0	0	0	0	0	0	0	0	0	0	0	0	0	0	0	1	0	0	0	0	0	0	0	0
nimesulide	C012655	nimesulide	51803-78-2	DTXSID3037250	DTXSID3037250	5	1	0	0	0	0	0	0	0	0	0	0	0	0	0	0	0	0	0	0	0	0	0	0	0	0	0	0	0	0	0	0	0	0	0	3	0	0	0	0	0	0	0	0
Niridazole	D009560	Niridazole	61-57-4	DTXSID6045244	DTXSID6045244	5	0	0	0	1	0	0	0	0	1	0	0	0	0	0	0	0	0	0	0	0	0	0	0	0	0	0	0	0	0	0	0	0	1	0	0	1	0	0	0	0	0	0	0
Nitrogen Dioxide	D009585	Nitrogen Dioxide	10102-44-0	DTXSID7020974	DTXSID7020974	5	0	0	0	0	0	0	0	0	0	0	0	0	0	0	0	0	0	0	0	0	0	0	0	0	0	0	0	0	1	0	0	0	0	0	0	0	0	0	0	0	0	0	0
N-nitrosobutylurea	C002738	N-nitrosobutylurea	869-01-2	DTXSID2020214	DTXSID2020214	5	0	0	0	0	0	0	0	0	0	0	0	0	0	0	0	0	0	0	0	0	0	0	0	0	0	0	0	0	0	0	0	0	0	0	0	0	0	0	0	0	0	0	0
ormaplatin	C049777	ormaplatin	62816-98-2	DTXSID50897225	DTXSID50897225	5	0	3	2	0	0	0	0	0	0	0	0	0	0	0	0	0	0	0	0	0	0	0	0	0	0	0	0	0	0	0	0	0	0	0	0	0	0	0	0	0	0	0	0
oxatomide	C015408	oxatomide	60607-34-3	DTXSID4045181	DTXSID4045181	5	0	0	0	0	0	0	0	0	0	0	0	0	0	0	0	2	0	0	0	0	0	0	0	0	0	0	0	0	0	0	0	0	0	0	0	0	0	0	0	0	0	0	0
Oxytetracycline	D010118	Oxytetracycline	7179-50-2	DTXSID2034413	DTXSID2034413	5	0	0	0	0	0	0	0	2	0	0	0	0	0	0	1	0	0	0	0	0	0	0	0	0	0	0	0	0	0	0	0	0	0	0	0	0	0	0	0	0	0	0	0
pantoprazole	C064276	pantoprazole	138786-67-1	DTXSID7044215	DTXSID7044215	5	1	0	0	0	1	0	0	0	0	0	0	0	0	0	0	0	0	0	0	0	0	0	0	0	0	0	0	0	0	0	0	0	0	0	0	0	0	0	0	0	0	0	0
p-Chloroamphetamine	D010133	p-Chloroamphetamine	64-12-0	DTXSID90897229	DTXSID90897229	5	0	2	0	0	0	0	0	0	0	1	0	0	0	0	0	0	1	0	0	0	0	0	0	0	0	0	0	0	0	0	0	0	0	0	0	0	0	0	0	0	0	1	0
Pentosan Sulfuric Polyester	D010426	Pentosan Sulfuric Polyester	37300-21-3	DTXSID10190764	DTXSID10190764	5	0	0	0	0	0	0	0	0	0	0	0	0	0	1	0	0	0	0	0	0	0	0	0	0	0	0	0	0	0	0	0	0	0	0	0	0	0	0	0	0	0	0	0
perflutren	C042852	perflutren	76-19-7	DTXSID9052503	DTXSID9052503	5	1	0	0	0	0	0	0	0	0	0	0	0	0	0	0	0	0	0	0	0	0	0	0	0	0	0	0	0	0	3	0	0	0	0	0	0	0	0	0	0	0	0	0
periciazine	C084584	periciazine	2622-26-6	DTXSID5045910	DTXSID5045910	5	0	0	0	0	0	0	0	0	1	1	0	0	0	0	0	0	0	0	0	0	0	0	0	0	0	0	0	0	0	0	0	0	0	0	0	0	0	0	0	0	0	0	0
Perindopril	D020913	Perindopril	107133-36-8	DTXSID1044198	DTXSID1044198	5	0	0	0	0	0	0	0	0	0	0	0	0	0	0	0	0	0	0	0	0	0	0	0	0	0	0	0	0	0	0	0	0	0	0	0	0	0	0	0	0	0	0	0
perospirone	C065533	perospirone	150915-41-6	DTXSID2048163	DTXSID2048163	5	0	0	0	0	0	3	0	0	0	0	0	0	0	0	0	0	0	0	0	0	0	0	0	0	0	0	0	0	0	0	0	0	0	0	0	0	0	0	0	0	0	0	0
Phenformin	D010629	Phenformin	114-86-3	DTXSID1023449	DTXSID1023449	5	0	0	0	0	3	0	0	1	0	0	0	0	0	0	0	0	0	0	0	0	0	0	0	0	0	0	0	0	0	1	0	0	0	0	0	0	0	0	0	0	0	0	0
Phenindione	D010630	Phenindione	83-12-5	DTXSID5023453	DTXSID5023453	5	0	0	2	0	1	0	0	0	0	0	0	0	0	0	0	0	0	0	0	0	0	0	0	0	0	0	0	0	0	0	0	0	0	0	0	0	0	0	0	0	0	0	0
Pheniramine	D010632	Pheniramine	86-21-5	DTXSID0023454	DTXSID0023454	5	0	0	0	0	0	0	0	0	2	0	0	0	1	0	0	0	0	0	0	0	0	0	0	0	0	0	0	0	0	0	0	0	0	0	0	1	0	0	0	0	0	0	0
Phentolamine	D010646	Phentolamine	73-05-2	DTXSID40223271	DTXSID40223271	5	0	0	0	0	0	0	0	0	0	0	0	0	0	0	0	0	0	0	0	0	0	0	0	0	0	0	0	0	0	0	0	0	0	0	0	0	2	0	0	0	0	0	0
phenylsaligenin cyclic phosphate	C046357	phenylsaligenin cyclic phosphate	(blank)	DTXSID20961225	DTXSID20961225	5	0	2	1	0	0	0	0	0	0	0	0	0	0	0	0	0	0	2	0	0	0	0	0	0	0	0	0	0	0	0	0	0	0	0	0	0	0	0	0	0	0	0	0
Phorate	D010702	Phorate	298-02-2	DTXSID4032459	DTXSID4032459	5	0	0	0	0	0	0	0	2	0	0	0	0	0	0	0	0	0	0	0	0	1	0	0	0	0	0	0	0	0	0	0	1	0	0	0	0	0	0	0	0	0	0	0
Propanidid	D011410	Propanidid	1421-14-3	DTXSID7048825	DTXSID7048825	5	1	0	0	0	0	0	0	0	0	2	0	0	0	0	0	0	0	0	1	0	0	0	0	0	0	1	0	0	0	0	0	0	0	0	0	0	0	0	0	0	0	0	0
propylene oxide	C009068	propylene oxide	75-56-9	DTXSID5021207	DTXSID5021207	5	0	2	1	0	0	0	0	0	0	0	0	0	0	0	0	0	0	1	0	0	0	0	0	0	0	0	0	0	0	0	0	0	0	0	0	0	0	0	0	0	0	0	0
Pyrithioxin	D011746	Pyrithioxin	1098-97-1	DTXSID3048362	DTXSID3048362	5	0	0	0	0	0	0	0	0	0	0	0	0	0	0	0	0	0	0	0	0	0	0	0	0	0	0	0	0	0	0	0	0	0	0	0	0	0	0	0	0	0	0	0
Rimantadine	D012299	Rimantadine	13392-28-4	DTXSID2023561	DTXSID2023561	5	1	1	0	0	0	0	0	0	0	0	0	2	0	0	0	0	0	0	0	0	0	0	0	1	0	0	0	0	0	0	0	0	0	0	0	0	0	0	0	0	0	0	0
Rose Bengal	D012395	Rose Bengal	11121-48-5	DTXSID20110074	DTXSID20110074	5	0	0	0	0	0	0	0	0	0	0	0	0	0	0	0	0	0	0	0	0	0	0	0	0	0	0	0	0	0	0	0	0	0	0	0	0	0	0	0	0	0	0	0
rotigotine	C047508	rotigotine	99755-59-6	DTXSID5046772	DTXSID5046772	5	0	0	0	0	0	0	0	0	0	0	0	0	0	0	0	0	0	0	0	0	0	0	0	1	0	0	0	0	0	0	0	0	0	0	0	0	0	0	0	0	0	0	0
Roxarsone	D012406	Roxarsone	121-19-7	DTXSID9020956	DTXSID9020956	5	0	2	2	0	0	0	0	0	0	0	0	0	0	0	0	0	0	0	0	0	0	0	0	0	0	0	0	0	0	0	0	0	0	0	0	0	0	0	0	0	0	0	0
rufinamide	C079703	rufinamide	106308-44-5	DTXSID1046506	DTXSID1046506	5	0	1	0	0	0	0	0	0	0	0	0	1	0	0	0	0	0	0	0	0	0	0	0	1	0	0	0	0	0	0	0	0	0	0	0	0	0	0	0	0	0	0	0
Ruthenium	D012428	Ruthenium	7440-18-8	DTXSID9064687	DTXSID9064687	5	1	0	0	0	0	0	0	0	0	0	0	0	0	0	0	0	0	0	0	0	2	0	0	0	0	0	0	0	0	0	0	0	0	0	0	0	0	0	0	0	0	0	0
Silicon	D012825	Silicon	7440-21-3	DTXSID0051441	DTXSID0051441	5	0	1	0	0	0	0	0	0	0	0	0	0	0	0	0	0	0	0	0	0	0	0	0	0	0	0	0	0	0	0	0	0	0	0	0	0	0	0	0	0	0	0	0
Sodium Azide	D019810	Sodium Azide	26628-22-8	DTXSID8020121	DTXSID8020121	5	0	2	0	0	0	0	0	0	0	0	0	0	0	0	0	0	0	0	0	0	0	0	0	0	0	0	0	0	0	0	0	0	0	0	0	0	0	0	0	0	0	0	0
sodium bisulfite	C009279	sodium bisulfite	7631-90-5	DTXSID8034902	DTXSID8034902	5	0	0	1	0	0	0	0	0	0	0	0	0	0	0	0	0	0	0	0	0	2	0	0	0	0	1	0	0	0	0	0	0	0	0	0	0	0	0	0	0	0	0	0
Sodium Cyanide	D012966	Sodium Cyanide	143-33-9	DTXSID4024309	DTXSID4024309	5	1	0	0	0	0	0	1	0	0	0	1	0	0	0	0	1	0	0	0	0	0	0	0	0	0	0	0	0	0	1	0	0	0	0	0	0	0	0	0	0	0	0	0
Sodium Tetradecyl Sulfate	D012981	Sodium Tetradecyl Sulfate	1191-50-0	DTXSID4042416	DTXSID4042416	5	0	1	1	0	1	0	0	0	0	0	0	0	0	0	0	0	0	0	0	0	0	0	0	0	0	0	0	0	0	0	0	0	0	0	0	0	0	0	0	0	0	0	0
suvorexant	C551624	suvorexant	1030377-33-3	DTXSID90145616	DTXSID90145616	5	0	0	0	0	0	0	0	0	1	0	0	0	0	0	0	0	0	0	0	0	0	0	0	1	0	0	1	0	0	0	0	0	0	0	0	0	0	0	0	0	0	0	0
Synephrine	D013578	Synephrine	94-07-5	DTXSID0030588	DTXSID0030588	5	0	0	0	0	0	0	0	0	1	0	0	0	0	0	0	0	0	1	0	0	0	0	0	0	0	0	0	0	1	0	0	0	0	1	0	0	0	0	0	0	0	0	0
tandospirone	C055267	tandospirone	87760-53-0	DTXSID6048836	DTXSID6048836	5	0	0	0	0	0	0	0	0	0	0	0	0	1	0	0	0	1	0	0	0	0	0	0	0	0	0	0	0	0	0	0	0	0	0	0	0	0	0	0	0	0	0	0
Terazosin	C041226	Terazosin	63590-64-7	DTXSID3023639	DTXSID3023639	5	0	0	0	0	0	0	0	0	0	0	0	0	0	0	0	0	0	0	0	0	0	0	0	0	0	0	0	0	0	0	0	0	0	1	0	0	3	0	0	0	0	0	0
Thiabendazole	D013827	Thiabendazole	148-79-8	DTXSID0021337	DTXSID0021337	5	0	0	0	0	0	0	0	0	0	0	0	0	0	0	0	0	0	0	0	0	0	0	0	0	0	1	0	0	0	0	0	0	0	0	0	0	0	0	0	0	0	0	0
Thioacetazone	D013828	Thioacetazone	104-06-3	DTXSID2022593	DTXSID2022593	5	0	0	1	0	0	0	0	0	0	0	0	0	0	0	0	0	0	0	0	0	0	0	0	0	0	0	0	0	0	0	0	0	0	0	0	0	0	0	0	0	0	0	0
Ticagrelor	C503700	Ticagrelor	(blank)	DTXSID901009337	DTXSID901009337	5	0	0	0	0	0	0	0	0	0	0	0	0	0	0	0	0	0	0	0	0	0	0	0	0	0	0	0	0	3	0	0	0	0	0	0	0	0	0	0	0	1	0	0
Toluene 2,4-Diisocyanate	D014051	Toluene 2,4-Diisocyanate	26471-62-5	DTXSID0024341	DTXSID0024341	5	0	1	0	0	1	0	0	0	0	0	1	0	0	0	0	0	0	0	0	0	0	0	0	0	0	0	0	0	0	0	0	0	0	0	0	0	0	0	0	0	0	0	0
trichloronate	C004372	trichloronate	327-98-0	DTXSID9038420	DTXSID9038420	5	0	0	1	1	0	0	0	0	0	0	0	0	0	1	0	0	0	0	0	0	1	0	0	0	0	0	0	0	0	0	0	1	0	0	0	0	0	0	0	0	0	0	0
triethyltin	C031575	triethyltin	997-50-2	DTXSID1032226	DTXSID1032226	5	0	2	0	0	0	0	0	0	0	0	0	0	0	0	0	0	0	0	0	0	0	0	0	0	0	0	0	0	0	0	0	0	0	0	0	3	0	0	0	0	0	0	0
Trinitrotoluene	D014303	Trinitrotoluene	118-96-7	DTXSID7024372	DTXSID7024372	5	1	2	1	0	0	0	0	0	0	0	0	1	0	0	0	0	0	0	0	0	0	0	0	0	0	0	0	0	0	0	0	0	0	0	0	0	0	0	0	0	0	0	0
Vilazodone Hydrochloride	D000069503	Vilazodone Hydrochloride	(blank)	DTXSID80936833	DTXSID80936833	5	3	0	0	0	0	0	0	1	0	0	0	0	0	0	0	0	0	0	0	0	0	0	1	0	0	0	0	0	0	0	0	0	0	0	0	0	0	0	0	0	0	0	0
vorapaxar	C530299	vorapaxar	(blank)	DTXSID201009336	DTXSID201009336	5	0	0	0	0	0	0	0	0	0	0	0	0	0	0	0	0	0	0	0	0	0	0	0	0	0	0	0	0	0	0	0	0	0	0	0	0	0	0	0	0	4	0	0
Win 55212-2	C070417	Win 55212-2	131543-22-1	DTXSID40894849	DTXSID40894849	5	0	0	0	0	0	0	1	0	0	0	2	0	0	0	0	0	0	0	0	0	0	0	0	0	0	0	0	0	0	0	0	0	0	0	0	0	0	0	0	0	0	1	0
zipeprol	C013341	zipeprol	(blank)	DTXSID00865732	DTXSID00865732	5	3	1	0	0	0	0	0	0	1	0	0	0	0	0	0	0	0	0	0	0	0	0	0	0	0	0	0	0	0	0	0	0	0	0	0	0	0	0	0	0	0	0	0
[truncated: 511 more columns]

## Sheet: Detail
Detail
Chemical	Disease	chemuid	ChemName	CAS RN	DSSToxID	Pub Yr	PMID	Title	LinkPMID	Descriptor	disuid	BioEff	DSSToxID
(1-pentyl-1H-indol-3-yl)(2,2,3,3-tetramethylcyclopropyl)methanone	Hallucinations	C586710	(1-pentyl-1H-indol-3-yl)(2,2,3,3-tetramethylcyclopropyl)methanone	1199943-44-6	DTXSID60152635	2017	28283378	The effects of synthetic cannabinoid UR-144 on the human body-A review of 39 cases.	28283378	Neurologic Manifestations	D006212	Hallucinations	DTXSID60152635
(1-pentyl-1H-indol-3-yl)(2,2,3,3-tetramethylcyclopropyl)methanone	Seizures	C586710	(1-pentyl-1H-indol-3-yl)(2,2,3,3-tetramethylcyclopropyl)methanone	1199943-44-6	DTXSID60152635	2017	28283378	The effects of synthetic cannabinoid UR-144 on the human body-A review of 39 cases.	28283378	Neurologic Manifestations	D012640	Seizures	DTXSID60152635
(1-pentyl-1H-indol-3-yl)(2,2,3,3-tetramethylcyclopropyl)methanone	Speech Disorders	C586710	(1-pentyl-1H-indol-3-yl)(2,2,3,3-tetramethylcyclopropyl)methanone	1199943-44-6	DTXSID60152635	2017	28283378	The effects of synthetic cannabinoid UR-144 on the human body-A review of 39 cases.	28283378	Neurologic Manifestations	D013064	Speech Disorders	DTXSID60152635
(1-pentyl-1H-indol-3-yl)(2,2,3,3-tetramethylcyclopropyl)methanone	Syncope	C586710	(1-pentyl-1H-indol-3-yl)(2,2,3,3-tetramethylcyclopropyl)methanone	1199943-44-6	DTXSID60152635	2017	28283378	The effects of synthetic cannabinoid UR-144 on the human body-A review of 39 cases.	28283378	Neurologic Manifestations	D013575	Syncope	DTXSID60152635
(1-pentyl-1H-indol-3-yl)(2,2,3,3-tetramethylcyclopropyl)methanone	Unconsciousness	C586710	(1-pentyl-1H-indol-3-yl)(2,2,3,3-tetramethylcyclopropyl)methanone	1199943-44-6	DTXSID60152635	2017	28283378	The effects of synthetic cannabinoid UR-144 on the human body-A review of 39 cases.	28283378	Neurologic Manifestations	D014474	Unconsciousness	DTXSID60152635
1-(3-chlorophenyl)piperazine	Autonomic Nervous System Diseases	C015068	1-(3-chlorophenyl)piperazine	6640-24-0	DTXSID9045138	1998	9704867	Serotonin syndrome after challenge with the 5-HT agonist meta-chlorophenylpiperazine.	9704867	Autonomic Nervous System Diseases	D001342	Autonomic Nervous System Diseases	DTXSID9045138
1-(3-chlorophenyl)piperazine	Dystonia	C015068	1-(3-chlorophenyl)piperazine	6640-24-0	DTXSID9045138	1993	8480838	Precipitation of dystonia by m-CPP in a schizophrenic patient treated with haloperidol.	8480838	Neurologic Manifestations	D004421	Dystonia	DTXSID9045138
1-(3-chlorophenyl)piperazine	Hyperkinesis	C015068	1-(3-chlorophenyl)piperazine	6640-24-0	DTXSID9045138	2004	15234597	A 5-HT2C agonist elicits hyperactivity and oral dyskinesia with hypophagia in rabbits.	15234597	Neurologic Manifestations	D006948	Hyperkinesis	DTXSID9045138
1-(3-chlorophenyl)piperazine	Migraine Disorders	C015068	1-(3-chlorophenyl)piperazine	6640-24-0	DTXSID9045138	1992	1575270	Trazodone induction of migraine headache through mCPP.	1575270	Central Nervous System Diseases	D008881	Migraine Disorders	DTXSID9045138
1-(3-chlorophenyl)piperazine	Migraine Disorders	C015068	1-(3-chlorophenyl)piperazine	6640-24-0	DTXSID9045138	2000	10891925	The serotonergic agent m-chlorophenylpiperazine induces migraine attacks: A controlled study.	10891925	Central Nervous System Diseases	D008881	Migraine Disorders	DTXSID9045138
1-(3-chlorophenyl)piperazine	Myoclonus	C015068	1-(3-chlorophenyl)piperazine	6640-24-0	DTXSID9045138	1998	9704867	Serotonin syndrome after challenge with the 5-HT agonist meta-chlorophenylpiperazine.	9704867	Neurologic Manifestations	D009207	Myoclonus	DTXSID9045138
1-(3-trifluoromethylphenyl)piperazine	Hallucinations	C018406	1-(3-trifluoromethylphenyl)piperazine	15532-75-9	DTXSID10165876	2010	19329546	Randomised double-blind, placebo-controlled trial of the effects of the 'party pills' BZP/TFMPP alone and in combination with alcohol.	19329546	Neurologic Manifestations	D006212	Hallucinations	DTXSID10165876
1-(3-trifluoromethylphenyl)piperazine	Migraine Disorders	C018406	1-(3-trifluoromethylphenyl)piperazine	15532-75-9	DTXSID10165876	2010	19329546	Randomised double-blind, placebo-controlled trial of the effects of the 'party pills' BZP/TFMPP alone and in combination with alcohol.	19329546	Central Nervous System Diseases	D008881	Migraine Disorders	DTXSID10165876
1-(3-trifluoromethylphenyl)piperazine	Seizures	C018406	1-(3-trifluoromethylphenyl)piperazine	15532-75-9	DTXSID10165876	2011	21495881	The clinical toxicology of the designer "party pills" benzylpiperazine and trifluoromethylphenylpiperazine.	21495881	Neurologic Manifestations	D012640	Seizures	DTXSID10165876
1-(3-trifluoromethylphenyl)piperazine	Sleep Initiation and Maintenance Disorders	C018406	1-(3-trifluoromethylphenyl)piperazine	15532-75-9	DTXSID10165876	2010	19329546	Randomised double-blind, placebo-controlled trial of the effects of the 'party pills' BZP/TFMPP alone and in combination with alcohol.	19329546	Sleep Wake Disorders	D007319	Sleep Initiation and Maintenance Disorders	DTXSID10165876
1-(3-trifluoromethylphenyl)piperazine	Somatosensory Disorders	C018406	1-(3-trifluoromethylphenyl)piperazine	15532-75-9	DTXSID10165876	2010	19329546	Randomised double-blind, placebo-controlled trial of the effects of the 'party pills' BZP/TFMPP alone and in combination with alcohol.	19329546	Neurologic Manifestations	D020886	Somatosensory Disorders	DTXSID10165876
1,1,1-trichloroethane	Brain Damage, Chronic	C024566	1,1,1-trichloroethane	71-55-6	DTXSID0021381	1993	8331433	Toxic encephalopathy due to 1,1,1-trichloroethane.	8331433	Central Nervous System Diseases	D001925	Brain Damage, Chronic	DTXSID0021381
1,1,1-trichloroethane	Brain Damage, Chronic	C024566	1,1,1-trichloroethane	71-55-6	DTXSID0021381	1996	8791934	MR in trichloroethane poisoning.	8791934	Central Nervous System Diseases	D001925	Brain Damage, Chronic	DTXSID0021381
1,1,1-trichloroethane	Brain Diseases	C024566	1,1,1-trichloroethane	71-55-6	DTXSID0021381	1994	8160661	Toxic encephalopathy due to 1,1,1-trichloroethane exposure.	8160661	Central Nervous System Diseases	D001927	Brain Diseases	DTXSID0021381
1,1,1-trichloroethane	Brain Diseases	C024566	1,1,1-trichloroethane	71-55-6	DTXSID0021381	1995	7605490	Toxic encephalopathy due to 1,1,1-trichloroethane exposure.	7605490	Central Nervous System Diseases	D001927	Brain Diseases	DTXSID0021381
1,1,1-trichloroethane	Brain Edema	C024566	1,1,1-trichloroethane	71-55-6	DTXSID0021381	1990	2231588	Fatal cerebral oedema following trichloroethane abuse.	2231588	Central Nervous System Diseases	D001929	Brain Edema	DTXSID0021381
1,1,1-trichloroethane	Cerebral Infarction	C024566	1,1,1-trichloroethane	71-55-6	DTXSID0021381	1983	6662442	Fatal poisoning by 1,1,1-trichloroethane after prolonged survival.	6662442	Central Nervous System Diseases	D002544	Cerebral Infarction	DTXSID0021381
1,1,1-trichloroethane	Coma	C024566	1,1,1-trichloroethane	71-55-6	DTXSID0021381	1996	8791934	MR in trichloroethane poisoning.	8791934	Neurologic Manifestations	D003128	Coma	DTXSID0021381
1,1,1-trichloroethane	Hypoxia, Brain	C024566	1,1,1-trichloroethane	71-55-6	DTXSID0021381	1983	6662442	Fatal poisoning by 1,1,1-trichloroethane after prolonged survival.	6662442	Central Nervous System Diseases	D002534	Hypoxia, Brain	DTXSID0021381
1,1,1-trichloroethane	Nervous System Diseases	C024566	1,1,1-trichloroethane	71-55-6	DTXSID0021381	1993	8277925	Neurotoxicologic examination of rats exposed to 1,1,1-trichloroethane vapor for 13 weeks.	8277925	Nervous System Diseases	D009422	Nervous System Diseases	DTXSID0021381
1,1,1-trichloroethane	Paresthesia	C024566	1,1,1-trichloroethane	71-55-6	DTXSID0021381	1996	8673514	Paresthesias and sensory neuropathy due to 1,1,1-trichloroethane.	8673514	Neurologic Manifestations	D010292	Paresthesia	DTXSID0021381
1,1,1-trichloroethane	Paresthesia	C024566	1,1,1-trichloroethane	71-55-6	DTXSID0021381	1994	8185391	Peripheral sensory neuropathy associated with 1,1,1-trichloroethane.	8185391	Neurologic Manifestations	D010292	Paresthesia	DTXSID0021381
1,1,1-trichloroethane	Peripheral Nervous System Diseases	C024566	1,1,1-trichloroethane	71-55-6	DTXSID0021381	1996	8673514	Paresthesias and sensory neuropathy due to 1,1,1-trichloroethane.	8673514	Neuromuscular Diseases	D010523	Peripheral Nervous System Diseases	DTXSID0021381
1,1,1-trichloroethane	Peripheral Nervous System Diseases	C024566	1,1,1-trichloroethane	71-55-6	DTXSID0021381	1994	8185391	Peripheral sensory neuropathy associated with 1,1,1-trichloroethane.	8185391	Neuromuscular Diseases	D010523	Peripheral Nervous System Diseases	DTXSID0021381
1,1,1-trichloroethane	Peripheral Nervous System Diseases	C024566	1,1,1-trichloroethane	71-55-6	DTXSID0021381	1995	7605490	Toxic encephalopathy due to 1,1,1-trichloroethane exposure.	7605490	Neuromuscular Diseases	D010523	Peripheral Nervous System Diseases	DTXSID0021381
1,1,1-trichloroethane	Peripheral Nervous System Diseases	C024566	1,1,1-trichloroethane	71-55-6	DTXSID0021381	1988	2845159	Peripheral neuropathy in two workers exposed to 1,1,1-trichloroethane.	2845159	Neuromuscular Diseases	D010523	Peripheral Nervous System Diseases	DTXSID0021381
1,1,1-trichloroethane	Seizures	C024566	1,1,1-trichloroethane	71-55-6	DTXSID0021381	1996	8888022	Functional observational battery comparing effects of ethanol, 1,1,1-trichloroethane, ether, and flurothyl.	8888022	Neurologic Manifestations	D012640	Seizures	DTXSID0021381
1,1,1-trichloroethane	Sensation Disorders	C024566	1,1,1-trichloroethane	71-55-6	DTXSID0021381	1996	8673514	Paresthesias and sensory neuropathy due to 1,1,1-trichloroethane.	8673514	Neurologic Manifestations	D012678	Sensation Disorders	DTXSID0021381
1,2,3,4-tetrahydro-1-(phenylmethyl)isoquinoline	Hyperkinesis	C084924	1,2,3,4-tetrahydro-1-(phenylmethyl)isoquinoline	57680-86-1	DTXSID30360922	2016	26303030	Neuroprotective Effect of the Endogenous Amine 1MeTIQ in an Animal Model of Parkinson's Disease.	26303030	Neurologic Manifestations	D006948	Hyperkinesis	DTXSID30360922
1,2,3,4-tetrahydro-1-(phenylmethyl)isoquinoline	Hyperkinesis	C084924	1,2,3,4-tetrahydro-1-(phenylmethyl)isoquinoline	57680-86-1	DTXSID30360922	2014	24842650	1-Benzyl-1,2,3,4-tetrahydroisoquinoline, an endogenous neurotoxic compound, disturbs the behavioral and biochemical effects of L-DOPA: in vivo and ex vivo studies in the rat.	24842650	Neurologic Manifestations	D006948	Hyperkinesis	DTXSID30360922
1,2,3,4-tetrahydro-1-(phenylmethyl)isoquinoline	Parkinson Disease, Secondary	C084924	1,2,3,4-tetrahydro-1-(phenylmethyl)isoquinoline	57680-86-1	DTXSID30360922	1996	8905742	Chronic administration of 1-benzyl-1,2,3,4-tetrahydroisoquinoline, an endogenous amine in the brain, induces parkinsonism in a primate.	8905742	Basal Ganglia Diseases	D010302	Parkinson Disease, Secondary	DTXSID30360922
1,2,3,4-tetrahydro-1-(phenylmethyl)isoquinoline	Parkinson Disease, Secondary	C084924	1,2,3,4-tetrahydro-1-(phenylmethyl)isoquinoline	57680-86-1	DTXSID30360922	2001	11430895	Biochemical and pathological study of endogenous 1-benzyl-1,2,3,4-tetrahydroisoquinoline-induced parkinsonism in the mouse.	11430895	Basal Ganglia Diseases	D010302	Parkinson Disease, Secondary	DTXSID30360922
1,2,3,4-tetrahydro-1-(phenylmethyl)isoquinoline	Parkinsonian Disorders	C084924	1,2,3,4-tetrahydro-1-(phenylmethyl)isoquinoline	57680-86-1	DTXSID30360922	2016	26303030	Neuroprotective Effect of the Endogenous Amine 1MeTIQ in an Animal Model of Parkinson's Disease.	26303030	Basal Ganglia Diseases	D020734	Parkinsonian Disorders	DTXSID30360922
1,2,3,4-tetrahydro-1-(phenylmethyl)isoquinoline	Parkinsonian Disorders	C084924	1,2,3,4-tetrahydro-1-(phenylmethyl)isoquinoline	57680-86-1	DTXSID30360922	2003	14739562	Salsolinol causing parkinsonism activates endoplasmic reticulum-stress signaling pathways in human dopaminergic SK-N-SH cells.	14739562	Basal Ganglia Diseases	D020734	Parkinsonian Disorders	DTXSID30360922
1,2,3,4-tetrahydroisoquinoline	Catalepsy	C014843	1,2,3,4-tetrahydroisoquinoline	91-21-4	DTXSID6026115	2000	11041279	Antidopaminergic effects of 1,2,3,4-tetrahydroisoquinoline and salsolinol.	11041279	Neurologic Manifestations	D002375	Catalepsy	DTXSID6026115
1,2,3,4-tetrahydroisoquinoline	Hypokinesia	C014843	1,2,3,4-tetrahydroisoquinoline	91-21-4	DTXSID6026115	2001	11723179	Evaluation of neurotoxicity of TIQ and MPTP and of parkinsonism-preventing effect of 1-MeTIQ by in vivo measurement of pre-synaptic dopamine transporters and post-synaptic dopamine D(2) receptors in the mouse striatum.	11723179	Neurologic Manifestations	D018476	Hypokinesia	DTXSID6026115
1,2,3,4-tetrahydroisoquinoline	Parkinson Disease, Secondary	C014843	1,2,3,4-tetrahydroisoquinoline	91-21-4	DTXSID6026115	1993	8093578	Parkinsonism produced by tetrahydroisoquinoline (TIQ) or the analogues.	8093578	Basal Ganglia Diseases	D010302	Parkinson Disease, Secondary	DTXSID6026115
1,2,3,4-tetrahydroisoquinoline	Parkinson Disease, Secondary	C014843	1,2,3,4-tetrahydroisoquinoline	91-21-4	DTXSID6026115	1989	2630145	[Tetrahydroisoquinoline and parkinsonism].	2630145	Basal Ganglia Diseases	D010302	Parkinson Disease, Secondary	DTXSID6026115
1,2,3,4-tetrahydroisoquinoline	Parkinson Disease, Secondary	C014843	1,2,3,4-tetrahydroisoquinoline	91-21-4	DTXSID6026115	1989	2584300	Presence of tetrahydroisoquinoline, a parkinsonism-related compound, in foods.	2584300	Basal Ganglia Diseases	D010302	Parkinson Disease, Secondary	DTXSID6026115
1,2,3,4-tetrahydroisoquinoline	Parkinson Disease, Secondary	C014843	1,2,3,4-tetrahydroisoquinoline	91-21-4	DTXSID6026115	2000	11041279	Antidopaminergic effects of 1,2,3,4-tetrahydroisoquinoline and salsolinol.	11041279	Basal Ganglia Diseases	D010302	Parkinson Disease, Secondary	DTXSID6026115
1,2,3,4-tetrahydroisoquinoline	Parkinson Disease, Secondary	C014843	1,2,3,4-tetrahydroisoquinoline	91-21-4	DTXSID6026115	2000	10705483	A chiral synthesis of four stereoisomers of 1,3-dimethyl-1,2,3,4-tetrahydroisoquinoline, an inducer of Parkinson-like syndrome.	10705483	Basal Ganglia Diseases	D010302	Parkinson Disease, Secondary	DTXSID6026115
1,2,3,4-tetrahydroisoquinoline	Parkinsonian Disorders	C014843	1,2,3,4-tetrahydroisoquinoline	91-21-4	DTXSID6026115	2001	11723179	Evaluation of neurotoxicity of TIQ and MPTP and of parkinsonism-preventing effect of 1-MeTIQ by in vivo measurement of pre-synaptic dopamine transporters and post-synaptic dopamine D(2) receptors in the mouse striatum.	11723179	Basal Ganglia Diseases	D020734	Parkinsonian Disorders	DTXSID6026115
1,2-diacetylbenzene	Amyotrophic Lateral Sclerosis	C048792	1,2-diacetylbenzene	704-00-7	DTXSID20220667	2005	15759132	A new murine model of giant proximal axonopathy.	15759132	Central Nervous System Diseases	D000690	Amyotrophic Lateral Sclerosis	DTXSID20220667
1,2-diacetylbenzene	Central Nervous System Diseases	C048792	1,2-diacetylbenzene	704-00-7	DTXSID20220667	1992	1447480	Alteration of brainstem auditory evoked potentials in diethylbenzene and diacetylbenzene-treated rats.	1447480	Central Nervous System Diseases	D002493	Central Nervous System Diseases	DTXSID20220667
1,2-diacetylbenzene	Nervous System Diseases	C048792	1,2-diacetylbenzene	704-00-7	DTXSID20220667	1991	1939999	Possible involvement of 1,2-diacetylbenzene in diethylbenzene-induced neuropathy in rats.	1939999	Nervous System Diseases	D009422	Nervous System Diseases	DTXSID20220667
1,2-diacetylbenzene	Nervous System Diseases	C048792	1,2-diacetylbenzene	704-00-7	DTXSID20220667	2001	11740911	1,2-diacetylbenzene, the neurotoxic metabolite of a chromogenic aromatic solvent, induces proximal axonopathy.	11740911	Nervous System Diseases	D009422	Nervous System Diseases	DTXSID20220667
1,2-diacetylbenzene	Nervous System Diseases	C048792	1,2-diacetylbenzene	704-00-7	DTXSID20220667	2002	11890826	Theoretical determination of chromophores in the chromogenic effects of aromatic neurotoxicants.	11890826	Nervous System Diseases	D009422	Nervous System Diseases	DTXSID20220667
1,3-butadiene	Brain Neoplasms	C031763	1,3-butadiene	106-99-0	DTXSID3020203	1985	3966163	Multiple organ carcinogenicity of 1,3-butadiene in B6C3F1 mice after 60 weeks of inhalation exposure.	3966163	Central Nervous System Diseases	D001932	Brain Neoplasms	DTXSID3020203
1,3-butadiene	Brain Neoplasms	C031763	1,3-butadiene	106-99-0	DTXSID3020203	2005	15814359	Genetic alterations in brain tumors following 1,3-butadiene exposure in B6C3F1 mice.	15814359	Central Nervous System Diseases	D001932	Brain Neoplasms	DTXSID3020203
1,3-butadiene	Brain Neoplasms	C031763	1,3-butadiene	106-99-0	DTXSID3020203	2007	16860786	Evaluation of genetic alterations in cancer-related genes in lung and brain tumors from B6C3F1 mice exposed to 1,3-butadiene or chloroprene.	16860786	Central Nervous System Diseases	D001932	Brain Neoplasms	DTXSID3020203
1,3-butadiene	Central Nervous System Diseases	C031763	1,3-butadiene	106-99-0	DTXSID3020203	2007	18220155	Clinical evaluation of 1,3-butadiene neurotoxicity in humans.	18220155	Central Nervous System Diseases	D002493	Central Nervous System Diseases	DTXSID3020203
1,3-butadiene	Central Nervous System Neoplasms	C031763	1,3-butadiene	106-99-0	DTXSID3020203	2017	26443468	Differences in environmental exposure assignment due to residential mobility among children with a central nervous system tumor: Texas, 1995-2009.	26443468	Nervous System Neoplasms	D016543	Central Nervous System Neoplasms	DTXSID3020203
1,4-butanediol	Ataxia	C039681	1,4-butanediol	110-63-4	DTXSID2024666	2009	19655283	1,4-Butanediol content of aqua dots children's craft toy beads.	19655283	Neurologic Manifestations	D001259	Ataxia	DTXSID2024666
1,4-butanediol	Catalepsy	C039681	1,4-butanediol	110-63-4	DTXSID2024666	2013	23104245	Comparative study of equimolar doses of gamma-hydroxybutyrate (GHB), 1,4-butanediol (1,4-BD) and gamma-butyrolactone (GBL) on catalepsy after acute and chronic administration.	23104245	Neurologic Manifestations	D002375	Catalepsy	DTXSID2024666
1,4-butanediol	Coma	C039681	1,4-butanediol	110-63-4	DTXSID2024666	2009	19915428	Coma in a 20-month-old child from an ingestion of a toy containing 1,4-butanediol, a precursor of gamma-hydroxybutyrate.	19915428	Neurologic Manifestations	D003128	Coma	DTXSID2024666
1,4-butanediol	Coma	C039681	1,4-butanediol	110-63-4	DTXSID2024666	2009	19655283	1,4-Butanediol content of aqua dots children's craft toy beads.	19655283	Neurologic Manifestations	D003128	Coma	DTXSID2024666
1,4-butanediol	Coma	C039681	1,4-butanediol	110-63-4	DTXSID2024666	2001	11493842	Gamma-hydroxybutyrate, gamma-butyrolactone, and 1,4-butanediol.	11493842	Neurologic Manifestations	D003128	Coma	DTXSID2024666
1,4-butanediol	Coma	C039681	1,4-butanediol	110-63-4	DTXSID2024666	2002	11990207	Treatment of a 1,4-butanediol poisoning with fomepizole.	11990207	Neurologic Manifestations	D003128	Coma	DTXSID2024666
1,4-butanediol	Seizures	C039681	1,4-butanediol	110-63-4	DTXSID2024666	2008	18226321	Withdrawal from gamma-hydroxybutyrate, 1,4-butanediol and gamma-butyrolactone: a case report and systematic review.	18226321	Neurologic Manifestations	D012640	Seizures	DTXSID2024666
1,4-butanediol	Seizures	C039681	1,4-butanediol	110-63-4	DTXSID2024666	2004	15298490	Gamma-butyrolactone and 1,4-butanediol: abused analogues of gamma-hydroxybutyrate.	15298490	Neurologic Manifestations	D012640	Seizures	DTXSID2024666
1,4-butanediol	Seizures	C039681	1,4-butanediol	110-63-4	DTXSID2024666	2005	15953232	Survival of massive gamma-hydroxybutyrate/1,4-butanediol overdose.	15953232	Neurologic Manifestations	D012640	Seizures	DTXSID2024666
1,4-butanediol	Seizures	C039681	1,4-butanediol	110-63-4	DTXSID2024666	2009	19655283	1,4-Butanediol content of aqua dots children's craft toy beads.	19655283	Neurologic Manifestations	D012640	Seizures	DTXSID2024666
1,4-butanediol	Seizures	C039681	1,4-butanediol	110-63-4	DTXSID2024666	2000	11138892	Gamma-hydroxybutyrate, gamma-butyrolactone, and 1,4-butanediol: a case report and review of the literature.	11138892	Neurologic Manifestations	D012640	Seizures	DTXSID2024666
1,4-butanediol	Seizures	C039681	1,4-butanediol	110-63-4	DTXSID2024666	2001	11493842	Gamma-hydroxybutyrate, gamma-butyrolactone, and 1,4-butanediol.	11493842	Neurologic Manifestations	D012640	Seizures	DTXSID2024666
1,4-butanediol	Seizures	C039681	1,4-butanediol	110-63-4	DTXSID2024666	2002	11990207	Treatment of a 1,4-butanediol poisoning with fomepizole.	11990207	Neurologic Manifestations	D012640	Seizures	DTXSID2024666
1,4-butanediol	Unconsciousness	C039681	1,4-butanediol	110-63-4	DTXSID2024666	2001	11150358	Adverse events, including death, associated with the use of 1,4-butanediol.	11150358	Neurologic Manifestations	D014474	Unconsciousness	DTXSID2024666
1-hexylcarbamoyl-5-fluorouracil	Brain Damage, Chronic	C017367	1-hexylcarbamoyl-5-fluorouracil	61422-45-5	DTXSID2045941	1995	8748897	Carmofur-induced leukoencephalopathy: MRI.	8748897	Central Nervous System Diseases	D001925	Brain Damage, Chronic	DTXSID2045941
1-hexylcarbamoyl-5-fluorouracil	Brain Diseases	C017367	1-hexylcarbamoyl-5-fluorouracil	61422-45-5	DTXSID2045941	1985	3937066	[A case of toxic leucoencephalopathy induced by 5FU derivatives].	3937066	Central Nervous System Diseases	D001927	Brain Diseases	DTXSID2045941
1-hexylcarbamoyl-5-fluorouracil	Brain Diseases	C017367	1-hexylcarbamoyl-5-fluorouracil	61422-45-5	DTXSID2045941	1989	2667512	Leukoencephalopathy following treatment with carmofur: a case report and review of the Japanese literature.	2667512	Central Nervous System Diseases	D001927	Brain Diseases	DTXSID2045941
1-hexylcarbamoyl-5-fluorouracil	Brain Diseases	C017367	1-hexylcarbamoyl-5-fluorouracil	61422-45-5	DTXSID2045941	1988	3379758	[A case of leukoencephalopathy caused by HCFU].	3379758	Central Nervous System Diseases	D001927	Brain Diseases	DTXSID2045941
1-hexylcarbamoyl-5-fluorouracil	Brain Diseases	C017367	1-hexylcarbamoyl-5-fluorouracil	61422-45-5	DTXSID2045941	2008	18306661	[Leukoencephalopathy caused by antineoplastic drugs].	18306661	Central Nervous System Diseases	D001927	Brain Diseases	DTXSID2045941
1-hexylcarbamoyl-5-fluorouracil	Brain Diseases	C017367	1-hexylcarbamoyl-5-fluorouracil	61422-45-5	DTXSID2045941	2001	11734966	Diffusion-weighted MR imaging of Carmofur-induced leukoencephalopathy.	11734966	Central Nervous System Diseases	D001927	Brain Diseases	DTXSID2045941
1-hexylcarbamoyl-5-fluorouracil	Brain Diseases	C017367	1-hexylcarbamoyl-5-fluorouracil	61422-45-5	DTXSID2045941	2001	11725511	[A case of reversible carmofur-induced leukoencephalopathy].	11725511	Central Nervous System Diseases	D001927	Brain Diseases	DTXSID2045941
1-hexylcarbamoyl-5-fluorouracil	Brain Edema	C017367	1-hexylcarbamoyl-5-fluorouracil	61422-45-5	DTXSID2045941	2008	17682013	Delayed leukoencephalopathy with stroke-like presentation in chemotherapy recipients.	17682013	Central Nervous System Diseases	D001929	Brain Edema	DTXSID2045941
1-hexylcarbamoyl-5-fluorouracil	Central Nervous System Diseases	C017367	1-hexylcarbamoyl-5-fluorouracil	61422-45-5	DTXSID2045941	1986	3814445	[Central nervous system toxicity of carmofur, an antineoplastic drug].	3814445	Central Nervous System Diseases	D002493	Central Nervous System Diseases	DTXSID2045941
1-hexylcarbamoyl-5-fluorouracil	Dementia, Vascular	C017367	1-hexylcarbamoyl-5-fluorouracil	61422-45-5	DTXSID2045941	2008	17682013	Delayed leukoencephalopathy with stroke-like presentation in chemotherapy recipients.	17682013	Central Nervous System Diseases	D015140	Dementia, Vascular	DTXSID2045941
1-hexylcarbamoyl-5-fluorouracil	Demyelinating Diseases	C017367	1-hexylcarbamoyl-5-fluorouracil	61422-45-5	DTXSID2045941	1995	8748897	Carmofur-induced leukoencephalopathy: MRI.	8748897	Demyelinating Diseases	D003711	Demyelinating Diseases	DTXSID2045941
1-hexylcarbamoyl-5-fluorouracil	Encephalomalacia	C017367	1-hexylcarbamoyl-5-fluorouracil	61422-45-5	DTXSID2045941	2001	11734966	Diffusion-weighted MR imaging of Carmofur-induced leukoencephalopathy.	11734966	Central Nervous System Diseases	D004678	Encephalomalacia	DTXSID2045941
1-hexylcarbamoyl-5-fluorouracil	Leukoencephalopathy, Progressive Multifocal	C017367	1-hexylcarbamoyl-5-fluorouracil	61422-45-5	DTXSID2045941	1987	3329075	[Report on an autopsy of a cancer patient with Carmofur (HCFU) leukoencephalopathy].	3329075	Central Nervous System Diseases	D007968	Leukoencephalopathy, Progressive Multifocal	DTXSID2045941
1-hexylcarbamoyl-5-fluorouracil	Leukoencephalopathy, Progressive Multifocal	C017367	1-hexylcarbamoyl-5-fluorouracil	61422-45-5	DTXSID2045941	1987	3309192	Subacute leucoencephalopathy induced by carmofur, a 5-fluorouracil derivative.	3309192	Central Nervous System Diseases	D007968	Leukoencephalopathy, Progressive Multifocal	DTXSID2045941
1-hexylcarbamoyl-5-fluorouracil	Leukoencephalopathy, Progressive Multifocal	C017367	1-hexylcarbamoyl-5-fluorouracil	61422-45-5	DTXSID2045941	1986	3080815	Reversible leukoencephalopathy caused by 5-fluorouracil derivatives, presenting as akinetic mutism.	3080815	Central Nervous System Diseases	D007968	Leukoencephalopathy, Progressive Multifocal	DTXSID2045941
1-hexylcarbamoyl-5-fluorouracil	Leukoencephalopathy, Progressive Multifocal	C017367	1-hexylcarbamoyl-5-fluorouracil	61422-45-5	DTXSID2045941	1989	2487975	A case of carmofur-induced leukoencephalopathy--MR images and CT findings.	2487975	Central Nervous System Diseases	D007968	Leukoencephalopathy, Progressive Multifocal	DTXSID2045941
1-hexylcarbamoyl-5-fluorouracil	Leukoencephalopathy, Progressive Multifocal	C017367	1-hexylcarbamoyl-5-fluorouracil	61422-45-5	DTXSID2045941	1990	2096243	Carmofur-induced organic mental disorders.	2096243	Central Nervous System Diseases	D007968	Leukoencephalopathy, Progressive Multifocal	DTXSID2045941
1-hexylcarbamoyl-5-fluorouracil	Nervous System Diseases	C017367	1-hexylcarbamoyl-5-fluorouracil	61422-45-5	DTXSID2045941	2001	11410695	5-fluorouracil-induced leukoencephalopathy in patients with breast cancer.	11410695	Nervous System Diseases	D009422	Nervous System Diseases	DTXSID2045941
1-hexylcarbamoyl-5-fluorouracil	Nervous System Diseases	C017367	1-hexylcarbamoyl-5-fluorouracil	61422-45-5	DTXSID2045941	2001	11528249	A phase I study of raltitrexed (Tomudex) combined with carmofur in metastatic colorectal cancer.	11528249	Nervous System Diseases	D009422	Nervous System Diseases	DTXSID2045941
1-hexylcarbamoyl-5-fluorouracil	Paresthesia	C017367	1-hexylcarbamoyl-5-fluorouracil	61422-45-5	DTXSID2045941	1980	7448823	Phase I study of a new antitumor drug, 1-hexylcarbamoyl-5-fluorouracil (HCFU), administered orally: an HCFU clinical study group report.	7448823	Neurologic Manifestations	D010292	Paresthesia	DTXSID2045941
1-hexylcarbamoyl-5-fluorouracil	Posterior Leukoencephalopathy Syndrome	C017367	1-hexylcarbamoyl-5-fluorouracil	61422-45-5	DTXSID2045941	2007	18074566	[Drug-induced leukoencephalopathy].	18074566	Central Nervous System Diseases	D054038	Posterior Leukoencephalopathy Syndrome	DTXSID2045941
1-hexylcarbamoyl-5-fluorouracil	Speech Disorders	C017367	1-hexylcarbamoyl-5-fluorouracil	61422-45-5	DTXSID2045941	1984	6093712	[Clinical evaluation of 1-hexylcarbamoyl-5-fluorouracil (HCFU) in hepatocellular carcinoma].	6093712	Neurologic Manifestations	D013064	Speech Disorders	DTXSID2045941
1-hexylcarbamoyl-5-fluorouracil	Stroke	C017367	1-hexylcarbamoyl-5-fluorouracil	61422-45-5	DTXSID2045941	2008	17682013	Delayed leukoencephalopathy with stroke-like presentation in chemotherapy recipients.	17682013	Central Nervous System Diseases	D020521	Stroke	DTXSID2045941
1-hexylcarbamoyl-5-fluorouracil	Unconsciousness	C017367	1-hexylcarbamoyl-5-fluorouracil	61422-45-5	DTXSID2045941	1984	6093712	[Clinical evaluation of 1-hexylcarbamoyl-5-fluorouracil (HCFU) in hepatocellular carcinoma].	6093712	Neurologic Manifestations	D014474	Unconsciousness	DTXSID2045941
1-methyl-1,2,3,4-tetrahydroisoquinoline	Hyperkinesis	C050386	1-methyl-1,2,3,4-tetrahydroisoquinoline	4965-09-7	DTXSID70897161	2016	26303030	Neuroprotective Effect of the Endogenous Amine 1MeTIQ in an Animal Model of Parkinson's Disease.	26303030	Neurologic Manifestations	D006948	Hyperkinesis	DTXSID70897161
1-methyl-1,2,3,4-tetrahydroisoquinoline	Hypokinesia	C050386	1-methyl-1,2,3,4-tetrahydroisoquinoline	4965-09-7	DTXSID70897161	2001	11723179	Evaluation of neurotoxicity of TIQ and MPTP and of parkinsonism-preventing effect of 1-MeTIQ by in vivo measurement of pre-synaptic dopamine transporters and post-synaptic dopamine D(2) receptors in the mouse striatum.	11723179	Neurologic Manifestations	D018476	Hypokinesia	DTXSID70897161
1-methyl-1,2,3,4-tetrahydroisoquinoline	Parkinson Disease, Secondary	C050386	1-methyl-1,2,3,4-tetrahydroisoquinoline	4965-09-7	DTXSID70897161	1993	8093578	Parkinsonism produced by tetrahydroisoquinoline (TIQ) or the analogues.	8093578	Basal Ganglia Diseases	D010302	Parkinson Disease, Secondary	DTXSID70897161
1-methyl-1,2,3,4-tetrahydroisoquinoline	Parkinsonian Disorders	C050386	1-methyl-1,2,3,4-tetrahydroisoquinoline	4965-09-7	DTXSID70897161	2016	26303030	Neuroprotective Effect of the Endogenous Amine 1MeTIQ in an Animal Model of Parkinson's Disease.	26303030	Basal Ganglia Diseases	D020734	Parkinsonian Disorders	DTXSID70897161
1-methyl-1,2,3,4-tetrahydroisoquinoline	Parkinsonian Disorders	C050386	1-methyl-1,2,3,4-tetrahydroisoquinoline	4965-09-7	DTXSID70897161	2001	11723179	Evaluation of neurotoxicity of TIQ and MPTP and of parkinsonism-preventing effect of 1-MeTIQ by in vivo measurement of pre-synaptic dopamine transporters and post-synaptic dopamine D(2) receptors in the mouse striatum.	11723179	Basal Ganglia Diseases	D020734	Parkinsonian Disorders	DTXSID70897161
1-methyl-4-(2'-methylphenyl)-1,2,3,6-tetrahydropyridine	Brain Diseases	C048977	1-methyl-4-(2'-methylphenyl)-1,2,3,6-tetrahydropyridine	102417-86-7	DTXSID70877241	1993	7683168	Neuroprotective effects of alpha-dihydroergocryptine against damages in the substantia nigra caused by severe treatment with 1-methyl-4-phenyl-1,2,3,6-tetrahydropyridine.	7683168	Central Nervous System Diseases	D001927	Brain Diseases	DTXSID70877241
1-methyl-4-(2'-methylphenyl)-1,2,3,6-tetrahydropyridine	MPTP Poisoning	C048977	1-methyl-4-(2'-methylphenyl)-1,2,3,6-tetrahydropyridine	102417-86-7	DTXSID70877241	1993	8094427	Behavioral tolerance to repeated apomorphine administration in parkinsonian monkeys.	8094427	Neurotoxicity Syndromes	D020267	MPTP Poisoning	DTXSID70877241
1-methyl-4-(2'-methylphenyl)-1,2,3,6-tetrahydropyridine	MPTP Poisoning	C048977	1-methyl-4-(2'-methylphenyl)-1,2,3,6-tetrahydropyridine	102417-86-7	DTXSID70877241	1997	9396088	Comparison of key steps in 1-methyl-4-phenyl-1,2,3,6-tetrahydropyridine (MPTP) neurotoxicity in rodents.	9396088	Neurotoxicity Syndromes	D020267	MPTP Poisoning	DTXSID70877241
1-methyl-4-(2'-methylphenyl)-1,2,3,6-tetrahydropyridine	MPTP Poisoning	C048977	1-methyl-4-(2'-methylphenyl)-1,2,3,6-tetrahydropyridine	102417-86-7	DTXSID70877241	1990	2253695	Effects of chronic treatment of MPTP monkeys with bromocriptine alone or in combination with SKF 38393.	2253695	Neurotoxicity Syndromes	D020267	MPTP Poisoning	DTXSID70877241
1-methyl-4-(2'-methylphenyl)-1,2,3,6-tetrahydropyridine	MPTP Poisoning	C048977	1-methyl-4-(2'-methylphenyl)-1,2,3,6-tetrahydropyridine	102417-86-7	DTXSID70877241	1990	2204050	The neurotoxicity of MPTP and the relevance to Parkinson's disease.	2204050	Neurotoxicity Syndromes	D020267	MPTP Poisoning	DTXSID70877241
1-methyl-4-(2'-methylphenyl)-1,2,3,6-tetrahydropyridine	MPTP Poisoning	C048977	1-methyl-4-(2'-methylphenyl)-1,2,3,6-tetrahydropyridine	102417-86-7	DTXSID70877241	1992	1362875	Molecular basis of discrepancies in neurotoxic properties among 1-methyl-4-aryl-1,2,3,6-tetrahydropyridines.	1362875	Neurotoxicity Syndromes	D020267	MPTP Poisoning	DTXSID70877241
1-methyl-4-(2'-methylphenyl)-1,2,3,6-tetrahydropyridine	Nervous System Diseases	C048977	1-methyl-4-(2'-methylphenyl)-1,2,3,6-tetrahydropyridine	102417-86-7	DTXSID70877241	1995	8534316	Relative resistance of rabbits to MPTP neurotoxicity.	8534316	Nervous System Diseases	D009422	Nervous System Diseases	DTXSID70877241
1-methyl-4-(2'-methylphenyl)-1,2,3,6-tetrahydropyridine	Nervous System Diseases	C048977	1-methyl-4-(2'-methylphenyl)-1,2,3,6-tetrahydropyridine	102417-86-7	DTXSID70877241	1993	8102929	Selective MPP+ uptake into synaptic dopamine vesicles: possible involvement in MPTP neurotoxicity.	8102929	Nervous System Diseases	D009422	Nervous System Diseases	DTXSID70877241
1-methyl-4-(2'-methylphenyl)-1,2,3,6-tetrahydropyridine	Nervous System Diseases	C048977	1-methyl-4-(2'-methylphenyl)-1,2,3,6-tetrahydropyridine	102417-86-7	DTXSID70877241	1990	2325834	Attenuation of 1-methyl-4-phenyl-1,2,3,6-tetrahydropyridine-induced neurotoxicity by tobacco smoke.	2325834	Nervous System Diseases	D009422	Nervous System Diseases	DTXSID70877241
1-methyl-4-(2'-methylphenyl)-1,2,3,6-tetrahydropyridine	Nervous System Diseases	C048977	1-methyl-4-(2'-methylphenyl)-1,2,3,6-tetrahydropyridine	102417-86-7	DTXSID70877241	1989	2485822	The neurotoxicity of MPTP and its relationship to the pathophysiology of Parkinson's disease.	2485822	Nervous System Diseases	D009422	Nervous System Diseases	DTXSID70877241
1-methyl-4-(2'-methylphenyl)-1,2,3,6-tetrahydropyridine	Nervous System Diseases	C048977	1-methyl-4-(2'-methylphenyl)-1,2,3,6-tetrahydropyridine	102417-86-7	DTXSID70877241	1990	1974854	Differential recovery of dopamine synthetic enzymes following MPTP and the consequences of GM1 ganglioside treatment.	1974854	Nervous System Diseases	D009422	Nervous System Diseases	DTXSID70877241
1-methyl-4-(2'-methylphenyl)-1,2,3,6-tetrahydropyridine	Nervous System Diseases	C048977	1-methyl-4-(2'-methylphenyl)-1,2,3,6-tetrahydropyridine	102417-86-7	DTXSID70877241	1990	2117541	1-Methyl-4-(2'-methylphenyl)-1,2,3,6-tetrahydropyridine (2'-methyl-MPTP) is less neurotoxic than MPTP in the common marmoset.	2117541	Nervous System Diseases	D009422	Nervous System Diseases	DTXSID70877241
1-methyl-4-(2'-methylphenyl)-1,2,3,6-tetrahydropyridine	Nervous System Diseases	C048977	1-methyl-4-(2'-methylphenyl)-1,2,3,6-tetrahydropyridine	102417-86-7	DTXSID70877241	1992	1364057	Comparative studies of the neurotoxicity of MPTP in rats of different ages.	1364057	Nervous System Diseases	D009422	Nervous System Diseases	DTXSID70877241
1-methyl-4-(2'-methylphenyl)-1,2,3,6-tetrahydropyridine	Parkinson Disease, Secondary	C048977	1-methyl-4-(2'-methylphenyl)-1,2,3,6-tetrahydropyridine	102417-86-7	DTXSID70877241	1993	8094427	Behavioral tolerance to repeated apomorphine administration in parkinsonian monkeys.	8094427	Basal Ganglia Diseases	D010302	Parkinson Disease, Secondary	DTXSID70877241
1-methyl-4-(2'-methylphenyl)-1,2,3,6-tetrahydropyridine	Parkinson Disease, Secondary	C048977	1-methyl-4-(2'-methylphenyl)-1,2,3,6-tetrahydropyridine	102417-86-7	DTXSID70877241	1997	9396088	Comparison of key steps in 1-methyl-4-phenyl-1,2,3,6-tetrahydropyridine (MPTP) neurotoxicity in rodents.	9396088	Basal Ganglia Diseases	D010302	Parkinson Disease, Secondary	DTXSID70877241
1-methyl-4-(2'-methylphenyl)-1,2,3,6-tetrahydropyridine	Parkinson Disease, Secondary	C048977	1-methyl-4-(2'-methylphenyl)-1,2,3,6-tetrahydropyridine	102417-86-7	DTXSID70877241	1990	2253695	Effects of chronic treatment of MPTP monkeys with bromocriptine alone or in combination with SKF 38393.	2253695	Basal Ganglia Diseases	D010302	Parkinson Disease, Secondary	DTXSID70877241
1-methyl-4-(2'-methylphenyl)-1,2,3,6-tetrahydropyridine	Parkinson Disease, Secondary	C048977	1-methyl-4-(2'-methylphenyl)-1,2,3,6-tetrahydropyridine	102417-86-7	DTXSID70877241	1990	2204050	The neurotoxicity of MPTP and the relevance to Parkinson's disease.	2204050	Basal Ganglia Diseases	D010302	Parkinson Disease, Secondary	DTXSID70877241
1-methyl-4-(2'-methylphenyl)-1,2,3,6-tetrahydropyridine	Parkinson Disease, Secondary	C048977	1-methyl-4-(2'-methylphenyl)-1,2,3,6-tetrahydropyridine	102417-86-7	DTXSID70877241	1992	1362875	Molecular basis of discrepancies in neurotoxic properties among 1-methyl-4-aryl-1,2,3,6-tetrahydropyridines.	1362875	Basal Ganglia Diseases	D010302	Parkinson Disease, Secondary	DTXSID70877241
1-methyl-4-(2'-methylphenyl)-1,2,3,6-tetrahydropyridine	Parkinsonian Disorders	C048977	1-methyl-4-(2'-methylphenyl)-1,2,3,6-tetrahydropyridine	102417-86-7	DTXSID70877241	2002	12379867	Neural stem cells display an inherent mechanism for rescuing dysfunctional neurons.	12379867	Basal Ganglia Diseases	D020734	Parkinsonian Disorders	DTXSID70877241
1-methyl-4-(2'-methylphenyl)-1,2,3,6-tetrahydropyridine	Parkinsonian Disorders	C048977	1-methyl-4-(2'-methylphenyl)-1,2,3,6-tetrahydropyridine	102417-86-7	DTXSID70877241	2002	12410250	Neural stem cells, scaffolds, and chaperones.	12410250	Basal Ganglia Diseases	D020734	Parkinsonian Disorders	DTXSID70877241
1-Methyl-4-phenyl-1,2,3,6-tetrahydropyridine	Alzheimer Disease	D015632	1-Methyl-4-phenyl-1,2,3,6-tetrahydropyridine	28289-54-5	DTXSID8040933	1993	8512193	The goldfish as a drug discovery vehicle for Parkinson's disease and other neurodegenerative disorders.	8512193	Neurodegenerative Diseases	D000544	Alzheimer Disease	DTXSID8040933
1-Methyl-4-phenyl-1,2,3,6-tetrahydropyridine	Alzheimer Disease	D015632	1-Methyl-4-phenyl-1,2,3,6-tetrahydropyridine	28289-54-5	DTXSID8040933	2011	21413090	The herbal preparation Padma® 28 protects against neurotoxicity in PC12 cells.	21413090	Neurodegenerative Diseases	D000544	Alzheimer Disease	DTXSID8040933
1-Methyl-4-phenyl-1,2,3,6-tetrahydropyridine	Amyotrophic Lateral Sclerosis	D015632	1-Methyl-4-phenyl-1,2,3,6-tetrahydropyridine	28289-54-5	DTXSID8040933	2008	17985252	Neurodegenerative diseases: neurotoxins as sufficient etiologic agents?	17985252	Central Nervous System Diseases	D000690	Amyotrophic Lateral Sclerosis	DTXSID8040933
1-Methyl-4-phenyl-1,2,3,6-tetrahydropyridine	Ataxia	D015632	1-Methyl-4-phenyl-1,2,3,6-tetrahydropyridine	28289-54-5	DTXSID8040933	2011	21804220	Neuroprotective effect of kaempferol against a 1-methyl-4-phenyl-1,2,3,6-tetrahydropyridine-induced mouse model of Parkinson's disease.	21804220	Neurologic Manifestations	D001259	Ataxia	DTXSID8040933
1-Methyl-4-phenyl-1,2,3,6-tetrahydropyridine	Basal Ganglia Diseases	D015632	1-Methyl-4-phenyl-1,2,3,6-tetrahydropyridine	28289-54-5	DTXSID8040933	1997	9163560	Talipexole or pramipexole combinations with chloro-APB (SKF 82958) in MPTP-induced hemiparkinsonian monkeys.	9163560	Basal Ganglia Diseases	D001480	Basal Ganglia Diseases	DTXSID8040933
1-Methyl-4-phenyl-1,2,3,6-tetrahydropyridine	Basal Ganglia Diseases	D015632	1-Methyl-4-phenyl-1,2,3,6-tetrahydropyridine	28289-54-5	DTXSID8040933	1985	2858007	Neurological consequence of industrial exposure to 1-methyl-4-phenyl-1,2,3,6-tetrahydropyridine.	2858007	Basal Ganglia Diseases	D001480	Basal Ganglia Diseases	DTXSID8040933
1-Methyl-4-phenyl-1,2,3,6-tetrahydropyridine	Basal Ganglia Diseases	D015632	1-Methyl-4-phenyl-1,2,3,6-tetrahydropyridine	28289-54-5	DTXSID8040933	1987	2437428	Partial protection from the dopaminergic neurotoxin 1-methyl-4-phenyl-1,2,3,6-tetrahydropyridine (MPTP) by Pro-Leu-Gly-NH2(PLG; MIF-1).	2437428	Basal Ganglia Diseases	D001480	Basal Ganglia Diseases	DTXSID8040933
1-Methyl-4-phenyl-1,2,3,6-tetrahydropyridine	Basal Ganglia Diseases	D015632	1-Methyl-4-phenyl-1,2,3,6-tetrahydropyridine	28289-54-5	DTXSID8040933	2009	19319673	MPTP intoxication in mice: a useful model of Leigh syndrome to study mitochondrial diseases in childhood.	19319673	Basal Ganglia Diseases	D001480	Basal Ganglia Diseases	DTXSID8040933
1-Methyl-4-phenyl-1,2,3,6-tetrahydropyridine	Basal Ganglia Diseases	D015632	1-Methyl-4-phenyl-1,2,3,6-tetrahydropyridine	28289-54-5	DTXSID8040933	1991	1956587	A model of chronic neurotoxicity: long-term retention of the neurotoxin 1-methyl-4-phenylpyridinium (MPP+) within catecholaminergic neurons.	1956587	Basal Ganglia Diseases	D001480	Basal Ganglia Diseases	DTXSID8040933
1-Methyl-4-phenyl-1,2,3,6-tetrahydropyridine	Basal Ganglia Diseases	D015632	1-Methyl-4-phenyl-1,2,3,6-tetrahydropyridine	28289-54-5	DTXSID8040933	1992	1317497	Calbindin-D28K-containing neurons in animal models of neurodegeneration: possible protection from excitotoxicity.	1317497	Basal Ganglia Diseases	D001480	Basal Ganglia Diseases	DTXSID8040933
1-Methyl-4-phenyl-1,2,3,6-tetrahydropyridine	Brain Damage, Chronic	D015632	1-Methyl-4-phenyl-1,2,3,6-tetrahydropyridine	28289-54-5	DTXSID8040933	2008	18328580	Hemiparkinsonian rats rotate toward the side with the weaker dopaminergic neurotransmission.	18328580	Central Nervous System Diseases	D001925	Brain Damage, Chronic	DTXSID8040933
1-Methyl-4-phenyl-1,2,3,6-tetrahydropyridine	Brain Diseases	D015632	1-Methyl-4-phenyl-1,2,3,6-tetrahydropyridine	28289-54-5	DTXSID8040933	1984	6607092	Selective nigral toxicity after systemic administration of 1-methyl-4-phenyl-1,2,5,6-tetrahydropyrine (MPTP) in the squirrel monkey.	6607092	Central Nervous System Diseases	D001927	Brain Diseases	DTXSID8040933
1-Methyl-4-phenyl-1,2,3,6-tetrahydropyridine	Brain Diseases	D015632	1-Methyl-4-phenyl-1,2,3,6-tetrahydropyridine	28289-54-5	DTXSID8040933	1994	8149986	Methamphetamine protects against MPTP neurotoxicity in C57BL mice.	8149986	Central Nervous System Diseases	D001927	Brain Diseases	DTXSID8040933
1-Methyl-4-phenyl-1,2,3,6-tetrahydropyridine	Brain Diseases	D015632	1-Methyl-4-phenyl-1,2,3,6-tetrahydropyridine	28289-54-5	DTXSID8040933	1994	7513362	The sigma receptor ligand (+/-)-BMY 14802 prevents methamphetamine-induced dopaminergic neurotoxicity via interactions at dopamine receptors.	7513362	Central Nervous System Diseases	D001927	Brain Diseases	DTXSID8040933
1-Methyl-4-phenyl-1,2,3,6-tetrahydropyridine	Brain Diseases	D015632	1-Methyl-4-phenyl-1,2,3,6-tetrahydropyridine	28289-54-5	DTXSID8040933	1993	7683168	Neuroprotective effects of alpha-dihydroergocryptine against damages in the substantia nigra caused by severe treatment with 1-methyl-4-phenyl-1,2,3,6-tetrahydropyridine.	7683168	Central Nervous System Diseases	D001927	Brain Diseases	DTXSID8040933
1-Methyl-4-phenyl-1,2,3,6-tetrahydropyridine	Brain Diseases	D015632	1-Methyl-4-phenyl-1,2,3,6-tetrahydropyridine	28289-54-5	DTXSID8040933	1993	8512600	Effect of acetyl-L-carnitine on 1-methyl-4-phenyl-1,2,3,6-tetrahydropyridine (MPTP) neurotoxicity.	8512600	Central Nervous System Diseases	D001927	Brain Diseases	DTXSID8040933
1-Methyl-4-phenyl-1,2,3,6-tetrahydropyridine	Brain Diseases	D015632	1-Methyl-4-phenyl-1,2,3,6-tetrahydropyridine	28289-54-5	DTXSID8040933	1998	9848095	Manganese superoxide dismutase overexpression attenuates MPTP toxicity.	9848095	Central Nervous System Diseases	D001927	Brain Diseases	DTXSID8040933
1-Methyl-4-phenyl-1,2,3,6-tetrahydropyridine	Brain Diseases	D015632	1-Methyl-4-phenyl-1,2,3,6-tetrahydropyridine	28289-54-5	DTXSID8040933	1987	2882814	Studies on the effect of 1-methyl-4-phenyl-1,2,3,6-tetrahydropyridine (MPTP) on central catecholamine neurons in C57BL/6 mice. Comparison with three other strains of mice.	2882814	Central Nervous System Diseases	D001927	Brain Diseases	DTXSID8040933
1-Methyl-4-phenyl-1,2,3,6-tetrahydropyridine	Brain Diseases	D015632	1-Methyl-4-phenyl-1,2,3,6-tetrahydropyridine	28289-54-5	DTXSID8040933	1986	2872936	Neurotoxic effects of N-methyl-4-phenyl-1,2,3,6-tetrahydropyridine (MPTP) in the cat. Tyrosine hydroxylase immunohistochemistry.	2872936	Central Nervous System Diseases	D001927	Brain Diseases	DTXSID8040933
1-Methyl-4-phenyl-1,2,3,6-tetrahydropyridine	Brain Diseases	D015632	1-Methyl-4-phenyl-1,2,3,6-tetrahydropyridine	28289-54-5	DTXSID8040933	1991	1815982	MPTP mechanisms of neurotoxicity and their implications for Parkinson's disease.	1815982	Central Nervous System Diseases	D001927	Brain Diseases	DTXSID8040933
1-Methyl-4-phenyl-1,2,3,6-tetrahydropyridine	Brain Diseases	D015632	1-Methyl-4-phenyl-1,2,3,6-tetrahydropyridine	28289-54-5	DTXSID8040933	1985	2417166	The toxic actions of MPTP and its metabolite MPP+ are not mimicked by analogues of MPTP lacking an N-methyl moiety.	2417166	Central Nervous System Diseases	D001927	Brain Diseases	DTXSID8040933
1-Methyl-4-phenyl-1,2,3,6-tetrahydropyridine	Brain Diseases	D015632	1-Methyl-4-phenyl-1,2,3,6-tetrahydropyridine	28289-54-5	DTXSID8040933	1991	1684822	Neurotoxic effects of 1-methyl-4-phenyl-1,2,3,6-tetrahydropyridine in the substantia nigra and the locus coeruleus in BALB/c mice.	1684822	Central Nervous System Diseases	D001927	Brain Diseases	DTXSID8040933
1-Methyl-4-phenyl-1,2,3,6-tetrahydropyridine	Catalepsy	D015632	1-Methyl-4-phenyl-1,2,3,6-tetrahydropyridine	28289-54-5	DTXSID8040933	1989	2616897	Maneb enhances MPTP neurotoxicity in mice.	2616897	Neurologic Manifestations	D002375	Catalepsy	DTXSID8040933
1-Methyl-4-phenyl-1,2,3,6-tetrahydropyridine	Catalepsy	D015632	1-Methyl-4-phenyl-1,2,3,6-tetrahydropyridine	28289-54-5	DTXSID8040933	1989	2532697	Continued administration of GM1 ganglioside is required to maintain recovery from neuroleptic-induced sensorimotor deficits in MPTP-treated mice.	2532697	Neurologic Manifestations	D002375	Catalepsy	DTXSID8040933
1-Methyl-4-phenyl-1,2,3,6-tetrahydropyridine	Catalepsy	D015632	1-Methyl-4-phenyl-1,2,3,6-tetrahydropyridine	28289-54-5	DTXSID8040933	1991	1649252	Diethyldithiocarbamate potentiates the neurotoxicity of in vivo 1-methyl-4-phenyl-1,2,3,6-tetrahydropyridine and of in vitro 1-methyl-4-phenylpyridinium.	1649252	Neurologic Manifestations	D002375	Catalepsy	DTXSID8040933
1-Methyl-4-phenyl-1,2,3,6-tetrahydropyridine	Catalepsy	D015632	1-Methyl-4-phenyl-1,2,3,6-tetrahydropyridine	28289-54-5	DTXSID8040933	2012	22912680	Neuroprotective activities of palmitoylethanolamide in an animal model of Parkinson's disease.	22912680	Neurologic Manifestations	D002375	Catalepsy	DTXSID8040933
1-Methyl-4-phenyl-1,2,3,6-tetrahydropyridine	Catalepsy	D015632	1-Methyl-4-phenyl-1,2,3,6-tetrahydropyridine	28289-54-5	DTXSID8040933	2000	10802035	Neuroprotection by sodium salicylate against 1-methyl-4-phenyl-1,2,3, 6-tetrahydropyridine-induced neurotoxicity.	10802035	Neurologic Manifestations	D002375	Catalepsy	DTXSID8040933
1-Methyl-4-phenyl-1,2,3,6-tetrahydropyridine	Catatonia	D015632	1-Methyl-4-phenyl-1,2,3,6-tetrahydropyridine	28289-54-5	DTXSID8040933	2009	19666045	Protective effect of cyclooxygenase (COX)-inhibitors against drug-induced catatonia and MPTP-induced striatal lesions in rats.	19666045	Neurologic Manifestations	D002389	Catatonia	DTXSID8040933
1-Methyl-4-phenyl-1,2,3,6-tetrahydropyridine	Central Nervous System Diseases	D015632	1-Methyl-4-phenyl-1,2,3,6-tetrahydropyridine	28289-54-5	DTXSID8040933	2001	11778669	Neurotoxicology of the brain barrier system: new implications.	11778669	Central Nervous System Diseases	D002493	Central Nervous System Diseases	DTXSID8040933
1-Methyl-4-phenyl-1,2,3,6-tetrahydropyridine	Chorea	D015632	1-Methyl-4-phenyl-1,2,3,6-tetrahydropyridine	28289-54-5	DTXSID8040933	1993	7688878	Thalamotomy for the alleviation of levodopa-induced dyskinesia: experimental studies in the 1-methyl-4-phenyl-1,2,3,6-tetrahydropyridine-treated parkinsonian monkey.	7688878	Central Nervous System Diseases	D002819	Chorea	DTXSID8040933
1-Methyl-4-phenyl-1,2,3,6-tetrahydropyridine	Chorea	D015632	1-Methyl-4-phenyl-1,2,3,6-tetrahydropyridine	28289-54-5	DTXSID8040933	1990	2296255	Induction of chorea and dystonia in parkinsonian primates.	2296255	Central Nervous System Diseases	D002819	Chorea	DTXSID8040933
1-Methyl-4-phenyl-1,2,3,6-tetrahydropyridine	Chronobiology Disorders	D015632	1-Methyl-4-phenyl-1,2,3,6-tetrahydropyridine	28289-54-5	DTXSID8040933	2013	23292542	A disruption mechanism of the molecular clock in a MPTP mouse model of Parkinson's disease.	23292542	Chronobiology Disorders	D021081	Chronobiology Disorders	DTXSID8040933
1-Methyl-4-phenyl-1,2,3,6-tetrahydropyridine	Dementia	D015632	1-Methyl-4-phenyl-1,2,3,6-tetrahydropyridine	28289-54-5	DTXSID8040933	2008	17985252	Neurodegenerative diseases: neurotoxins as sufficient etiologic agents?	17985252	Central Nervous System Diseases	D003704	Dementia	DTXSID8040933
1-Methyl-4-phenyl-1,2,3,6-tetrahydropyridine	Dystonia	D015632	1-Methyl-4-phenyl-1,2,3,6-tetrahydropyridine	28289-54-5	DTXSID8040933	1993	7688878	Thalamotomy for the alleviation of levodopa-induced dyskinesia: experimental studies in the 1-methyl-4-phenyl-1,2,3,6-tetrahydropyridine-treated parkinsonian monkey.	7688878	Neurologic Manifestations	D004421	Dystonia	DTXSID8040933
1-Methyl-4-phenyl-1,2,3,6-tetrahydropyridine	Dystonia	D015632	1-Methyl-4-phenyl-1,2,3,6-tetrahydropyridine	28289-54-5	DTXSID8040933	2008	18842698	Neuropathological changes induced by neurotoxin 1-methyl-4-phenyl-1,2,3,6-tetrahydropyridine in male Swiss albino mice.	18842698	Neurologic Manifestations	D004421	Dystonia	DTXSID8040933
1-Methyl-4-phenyl-1,2,3,6-tetrahydropyridine	Dystonia	D015632	1-Methyl-4-phenyl-1,2,3,6-tetrahydropyridine	28289-54-5	DTXSID8040933	1990	2296255	Induction of chorea and dystonia in parkinsonian primates.	2296255	Neurologic Manifestations	D004421	Dystonia	DTXSID8040933
1-Methyl-4-phenyl-1,2,3,6-tetrahydropyridine	Dystonia	D015632	1-Methyl-4-phenyl-1,2,3,6-tetrahydropyridine	28289-54-5	DTXSID8040933	1990	2296259	Neural mechanisms of dystonia: evidence from a 2-deoxyglucose uptake study in a primate model of dopamine agonist-induced dystonia.	2296259	Neurologic Manifestations	D004421	Dystonia	DTXSID8040933
1-Methyl-4-phenyl-1,2,3,6-tetrahydropyridine	Encephalitis	D015632	1-Methyl-4-phenyl-1,2,3,6-tetrahydropyridine	28289-54-5	DTXSID8040933	2012	22035588	Microglia-inhibiting activity of Parkinson's disease drug amantadine.	22035588	Central Nervous System Diseases	D004660	Encephalitis	DTXSID8040933
1-Methyl-4-phenyl-1,2,3,6-tetrahydropyridine	Epilepsy	D015632	1-Methyl-4-phenyl-1,2,3,6-tetrahydropyridine	28289-54-5	DTXSID8040933	1989	2598030	MPTP is proconvulsant acutely but has no long-term effect in rodent models of seizure and epilepsy.	2598030	Central Nervous System Diseases	D004827	Epilepsy	DTXSID8040933
1-Methyl-4-phenyl-1,2,3,6-tetrahydropyridine	Epilepsy	D015632	1-Methyl-4-phenyl-1,2,3,6-tetrahydropyridine	28289-54-5	DTXSID8040933	1989	2615919	Evidence for an epileptogenic action of 1-methyl-4-phenyl-1,2,3,6,-tetrahydropyridine.	2615919	Central Nervous System Diseases	D004827	Epilepsy	DTXSID8040933
1-Methyl-4-phenyl-1,2,3,6-tetrahydropyridine	Epilepsy	D015632	1-Methyl-4-phenyl-1,2,3,6-tetrahydropyridine	28289-54-5	DTXSID8040933	1991	1713316	The acute convulsant effect of MPTP is dependent on intracerebral MPP+.	1713316	Central Nervous System Diseases	D004827	Epilepsy	DTXSID8040933
1-Methyl-4-phenyl-1,2,3,6-tetrahydropyridine	Gait Disorders, Neurologic	D015632	1-Methyl-4-phenyl-1,2,3,6-tetrahydropyridine	28289-54-5	DTXSID8040933	2017	28363982	Deficiency in Neuronal TGF-β Signaling Leads to Nigrostriatal Degeneration and Activation of TGF-β Signaling Protects against MPTP Neurotoxicity in Mice.	28363982	Neurologic Manifestations	D020233	Gait Disorders, Neurologic	DTXSID8040933
1-Methyl-4-phenyl-1,2,3,6-tetrahydropyridine	Gait Disorders, Neurologic	D015632	1-Methyl-4-phenyl-1,2,3,6-tetrahydropyridine	28289-54-5	DTXSID8040933	2010	20478277	Neurotrophic and neurorescue effects of Echinacoside in the subacute MPTP mouse model of Parkinson's disease.	20478277	Neurologic Manifestations	D020233	Gait Disorders, Neurologic	DTXSID8040933
1-Methyl-4-phenyl-1,2,3,6-tetrahydropyridine	Huntington Disease	D015632	1-Methyl-4-phenyl-1,2,3,6-tetrahydropyridine	28289-54-5	DTXSID8040933	2007	17127354	Mitochondrial toxins and neurodegenerative diseases.	17127354	Basal Ganglia Diseases	D006816	Huntington Disease	DTXSID8040933
1-Methyl-4-phenyl-1,2,3,6-tetrahydropyridine	Hyperkinesis	D015632	1-Methyl-4-phenyl-1,2,3,6-tetrahydropyridine	28289-54-5	DTXSID8040933	2015	26111725	Chronic MPTP treatment produces hyperactivity in male mice which is not alleviated by concurrent trehalose treatment.	26111725	Neurologic Manifestations	D006948	Hyperkinesis	DTXSID8040933
1-Methyl-4-phenyl-1,2,3,6-tetrahydropyridine	Hyperkinesis	D015632	1-Methyl-4-phenyl-1,2,3,6-tetrahydropyridine	28289-54-5	DTXSID8040933	2007	17351422	Plasma levels of rotigotine and the reversal of motor deficits in MPTP-treated primates.	17351422	Neurologic Manifestations	D006948	Hyperkinesis	DTXSID8040933
1-Methyl-4-phenyl-1,2,3,6-tetrahydropyridine	Hyperkinesis	D015632	1-Methyl-4-phenyl-1,2,3,6-tetrahydropyridine	28289-54-5	DTXSID8040933	2008	18657593	Effects of levodopa on striatal monoamines in mice with levodopa-induced hyperactivity.	18657593	Neurologic Manifestations	D006948	Hyperkinesis	DTXSID8040933
1-Methyl-4-phenyl-1,2,3,6-tetrahydropyridine	Hyperkinesis	D015632	1-Methyl-4-phenyl-1,2,3,6-tetrahydropyridine	28289-54-5	DTXSID8040933	2013	23737982	Electro-acupuncture stimulation improves spontaneous locomotor hyperactivity in MPTP intoxicated mice.	23737982	Neurologic Manifestations	D006948	Hyperkinesis	DTXSID8040933
1-Methyl-4-phenyl-1,2,3,6-tetrahydropyridine	Hypokinesia	D015632	1-Methyl-4-phenyl-1,2,3,6-tetrahydropyridine	28289-54-5	DTXSID8040933	2005	15707778	Acanthopanax senticosus Harms as a prophylactic for MPTP-induced Parkinson's disease in rats.	15707778	Neurologic Manifestations	D018476	Hypokinesia	DTXSID8040933
1-Methyl-4-phenyl-1,2,3,6-tetrahydropyridine	Hypokinesia	D015632	1-Methyl-4-phenyl-1,2,3,6-tetrahydropyridine	28289-54-5	DTXSID8040933	2011	21736911	The influence and the mechanism of docosahexaenoic acid on a mouse model of Parkinson's disease.	21736911	Neurologic Manifestations	D018476	Hypokinesia	DTXSID8040933
1-Methyl-4-phenyl-1,2,3,6-tetrahydropyridine	Hypokinesia	D015632	1-Methyl-4-phenyl-1,2,3,6-tetrahydropyridine	28289-54-5	DTXSID8040933	2012	22850123	The food reaching test: a sensitive test of behavioral improvements by deep brain stimulation in MPTP-treated monkey.	22850123	Neurologic Manifestations	D018476	Hypokinesia	DTXSID8040933
1-Methyl-4-phenyl-1,2,3,6-tetrahydropyridine	Hypokinesia	D015632	1-Methyl-4-phenyl-1,2,3,6-tetrahydropyridine	28289-54-5	DTXSID8040933	2004	14978195	S32504, a novel naphtoxazine agonist at dopamine D3/D2 receptors: II. Actions in rodent, primate, and cellular models of antiparkinsonian activity in comparison to ropinirole.	14978195	Neurologic Manifestations	D018476	Hypokinesia	DTXSID8040933
1-Methyl-4-phenyl-1,2,3,6-tetrahydropyridine	Hypothalamic Diseases	D015632	1-Methyl-4-phenyl-1,2,3,6-tetrahydropyridine	28289-54-5	DTXSID8040933	1986	3486388	The dopamine neurotoxin 1-methyl-4-phenyl-1,2,3,6-tetrahydropyridine (MPTP) produces histological lesions in the hypothalamus of the common marmoset.	3486388	Central Nervous System Diseases	D007027	Hypothalamic Diseases	DTXSID8040933
1-Methyl-4-phenyl-1,2,3,6-tetrahydropyridine	Leigh Disease	D015632	1-Methyl-4-phenyl-1,2,3,6-tetrahydropyridine	28289-54-5	DTXSID8040933	2016	27787743	Respiratory chain inhibition: one more feature to propose MPTP intoxication as a Leigh syndrome model.	27787743	Central Nervous System Diseases	D007888	Leigh Disease	DTXSID8040933
1-Methyl-4-phenyl-1,2,3,6-tetrahydropyridine	Leigh Disease	D015632	1-Methyl-4-phenyl-1,2,3,6-tetrahydropyridine	28289-54-5	DTXSID8040933	2009	19319673	MPTP intoxication in mice: a useful model of Leigh syndrome to study mitochondrial diseases in childhood.	19319673	Central Nervous System Diseases	D007888	Leigh Disease	DTXSID8040933
1-Methyl-4-phenyl-1,2,3,6-tetrahydropyridine	Movement Disorders	D015632	1-Methyl-4-phenyl-1,2,3,6-tetrahydropyridine	28289-54-5	DTXSID8040933	1989	2785168	Deficits in reaction times and movement times as correlates of hypokinesia in monkeys with MPTP-induced striatal dopamine depletion.	2785168	Central Nervous System Diseases	D009069	Movement Disorders	DTXSID8040933
1-Methyl-4-phenyl-1,2,3,6-tetrahydropyridine	Movement Disorders	D015632	1-Methyl-4-phenyl-1,2,3,6-tetrahydropyridine	28289-54-5	DTXSID8040933	1987	3498531	MPTP, impairment of motor performance and amine accumulation in Macaca fascicularis.	3498531	Central Nervous System Diseases	D009069	Movement Disorders	DTXSID8040933
1-Methyl-4-phenyl-1,2,3,6-tetrahydropyridine	Movement Disorders	D015632	1-Methyl-4-phenyl-1,2,3,6-tetrahydropyridine	28289-54-5	DTXSID8040933	1985	2417166	The toxic actions of MPTP and its metabolite MPP+ are not mimicked by analogues of MPTP lacking an N-methyl moiety.	2417166	Central Nervous System Diseases	D009069	Movement Disorders	DTXSID8040933
1-Methyl-4-phenyl-1,2,3,6-tetrahydropyridine	MPTP Poisoning	D015632	1-Methyl-4-phenyl-1,2,3,6-tetrahydropyridine	28289-54-5	DTXSID8040933	1994	7911652	Glutamate and Parkinson's disease.	7911652	Neurotoxicity Syndromes	D020267	MPTP Poisoning	DTXSID8040933
1-Methyl-4-phenyl-1,2,3,6-tetrahydropyridine	MPTP Poisoning	D015632	1-Methyl-4-phenyl-1,2,3,6-tetrahydropyridine	28289-54-5	DTXSID8040933	1995	8588064	Effect of adding the D-1 agonist CY 208-243 to chronic bromocriptine treatment of MPTP-monkeys: regional changes of brain dopamine receptors.	8588064	Neurotoxicity Syndromes	D020267	MPTP Poisoning	DTXSID8040933
1-Methyl-4-phenyl-1,2,3,6-tetrahydropyridine	MPTP Poisoning	D015632	1-Methyl-4-phenyl-1,2,3,6-tetrahydropyridine	28289-54-5	DTXSID8040933	1993	8420136	MPTP and aging. Studies in the C57BL/6 mouse.	8420136	Neurotoxicity Syndromes	D020267	MPTP Poisoning	DTXSID8040933
1-Methyl-4-phenyl-1,2,3,6-tetrahydropyridine	MPTP Poisoning	D015632	1-Methyl-4-phenyl-1,2,3,6-tetrahydropyridine	28289-54-5	DTXSID8040933	1993	8413979	Gangliosides and parkinsonism.	8413979	Neurotoxicity Syndromes	D020267	MPTP Poisoning	DTXSID8040933
1-Methyl-4-phenyl-1,2,3,6-tetrahydropyridine	MPTP Poisoning	D015632	1-Methyl-4-phenyl-1,2,3,6-tetrahydropyridine	28289-54-5	DTXSID8040933	1993	8380523	Biochemical mechanisms underlying MPTP-induced and idiopathic parkinsonism. New vistas.	8380523	Neurotoxicity Syndromes	D020267	MPTP Poisoning	DTXSID8040933
1-Methyl-4-phenyl-1,2,3,6-tetrahydropyridine	MPTP Poisoning	D015632	1-Methyl-4-phenyl-1,2,3,6-tetrahydropyridine	28289-54-5	DTXSID8040933	1994	7925842	Regulation by D2 dopamine receptors of in vivo dopamine synthesis in striata of rats and mice with experimental parkinsonism.	7925842	Neurotoxicity Syndromes	D020267	MPTP Poisoning	DTXSID8040933
1-Methyl-4-phenyl-1,2,3,6-tetrahydropyridine	MPTP Poisoning	D015632	1-Methyl-4-phenyl-1,2,3,6-tetrahydropyridine	28289-54-5	DTXSID8040933	1994	8210225	MRI detects acute degeneration of the nigrostriatal dopamine system after MPTP exposure in hemiparkinsonian monkeys.	8210225	Neurotoxicity Syndromes	D020267	MPTP Poisoning	DTXSID8040933
1-Methyl-4-phenyl-1,2,3,6-tetrahydropyridine	MPTP Poisoning	D015632	1-Methyl-4-phenyl-1,2,3,6-tetrahydropyridine	28289-54-5	DTXSID8040933	1993	7688878	Thalamotomy for the alleviation of levodopa-induced dyskinesia: experimental studies in the 1-methyl-4-phenyl-1,2,3,6-tetrahydropyridine-treated parkinsonian monkey.	7688878	Neurotoxicity Syndromes	D020267	MPTP Poisoning	DTXSID8040933
1-Methyl-4-phenyl-1,2,3,6-tetrahydropyridine	MPTP Poisoning	D015632	1-Methyl-4-phenyl-1,2,3,6-tetrahydropyridine	28289-54-5	DTXSID8040933	1996	8615126	Excitatory amino acids and MPTP toxicity.	8615126	Neurotoxicity Syndromes	D020267	MPTP Poisoning	DTXSID8040933
1-Methyl-4-phenyl-1,2,3,6-tetrahydropyridine	MPTP Poisoning	D015632	1-Methyl-4-phenyl-1,2,3,6-tetrahydropyridine	28289-54-5	DTXSID8040933	1995	7672436	Might environmental factors contribute to neurodegenerative diseases?	7672436	Neurotoxicity Syndromes	D020267	MPTP Poisoning	DTXSID8040933
1-Methyl-4-phenyl-1,2,3,6-tetrahydropyridine	MPTP Poisoning	D015632	1-Methyl-4-phenyl-1,2,3,6-tetrahydropyridine	28289-54-5	DTXSID8040933	1996	8744121	[Effect of interferon on the development of Parkinson's syndrome, caused by administration of 1-methyl-4-phenyl-1,2,3,6-tetrahydropyridine (MPTP) in C57Bl/6 mice].	8744121	Neurotoxicity Syndromes	D020267	MPTP Poisoning	DTXSID8040933
1-Methyl-4-phenyl-1,2,3,6-tetrahydropyridine	MPTP Poisoning	D015632	1-Methyl-4-phenyl-1,2,3,6-tetrahydropyridine	28289-54-5	DTXSID8040933	1994	8179773	Long-term MPTP-treated monkeys are resistant to GM1 systemic therapy.	8179773	Neurotoxicity Syndromes	D020267	MPTP Poisoning	DTXSID8040933
1-Methyl-4-phenyl-1,2,3,6-tetrahydropyridine	MPTP Poisoning	D015632	1-Methyl-4-phenyl-1,2,3,6-tetrahydropyridine	28289-54-5	DTXSID8040933	1996	8618687	Consequences of nigrostriatal denervation on the gamma-aminobutyric acidic neurons of substantia nigra pars reticulata and superior colliculus in parkinsonian syndromes.	8618687	Neurotoxicity Syndromes	D020267	MPTP Poisoning	DTXSID8040933
1-Methyl-4-phenyl-1,2,3,6-tetrahydropyridine	MPTP Poisoning	D015632	1-Methyl-4-phenyl-1,2,3,6-tetrahydropyridine	28289-54-5	DTXSID8040933	1994	8197222	[MPTP--neurotoxin and model substance in Parkinson research].	8197222	Neurotoxicity Syndromes	D020267	MPTP Poisoning	DTXSID8040933
1-Methyl-4-phenyl-1,2,3,6-tetrahydropyridine	MPTP Poisoning	D015632	1-Methyl-4-phenyl-1,2,3,6-tetrahydropyridine	28289-54-5	DTXSID8040933	1995	8544992	Effects of L-DOPA on preproenkephalin and preprotachykinin gene expression in the MPTP-treated monkey striatum.	8544992	Neurotoxicity Syndromes	D020267	MPTP Poisoning	DTXSID8040933
1-Methyl-4-phenyl-1,2,3,6-tetrahydropyridine	MPTP Poisoning	D015632	1-Methyl-4-phenyl-1,2,3,6-tetrahydropyridine	28289-54-5	DTXSID8040933	1994	8309350	Development of a model for Parkinson's disease in sheep using unilateral intracarotid injection of MPTP via slow continuous infusion.	8309350	Neurotoxicity Syndromes	D020267	MPTP Poisoning	DTXSID8040933
1-Methyl-4-phenyl-1,2,3,6-tetrahydropyridine	MPTP Poisoning	D015632	1-Methyl-4-phenyl-1,2,3,6-tetrahydropyridine	28289-54-5	DTXSID8040933	1994	8263513	Increased iron in the substantia nigra compacta of the MPTP-lesioned hemiparkinsonian African green monkey: evidence from proton microprobe elemental microanalysis.	8263513	Neurotoxicity Syndromes	D020267	MPTP Poisoning	DTXSID8040933
1-Methyl-4-phenyl-1,2,3,6-tetrahydropyridine	MPTP Poisoning	D015632	1-Methyl-4-phenyl-1,2,3,6-tetrahydropyridine	28289-54-5	DTXSID8040933	1994	8289584	The novel anticonvulsant lamotrigine prevents dopamine depletion in C57 black mice in the MPTP animal model of Parkinson's disease.	8289584	Neurotoxicity Syndromes	D020267	MPTP Poisoning	DTXSID8040933
1-Methyl-4-phenyl-1,2,3,6-tetrahydropyridine	MPTP Poisoning	D015632	1-Methyl-4-phenyl-1,2,3,6-tetrahydropyridine	28289-54-5	DTXSID8040933	1996	8714707	Chronic alterations in dopaminergic neurotransmission produce a persistent elevation of deltaFosB-like protein(s) in both the rodent and primate striatum.	8714707	Neurotoxicity Syndromes	D020267	MPTP Poisoning	DTXSID8040933
1-Methyl-4-phenyl-1,2,3,6-tetrahydropyridine	MPTP Poisoning	D015632	1-Methyl-4-phenyl-1,2,3,6-tetrahydropyridine	28289-54-5	DTXSID8040933	1991	7580173	The effects of electroconvulsive shock on dopamine-1 and dopamine-2 receptor ligand binding activity in MPTP-treated mice.	7580173	Neurotoxicity Syndromes	D020267	MPTP Poisoning	DTXSID8040933
1-Methyl-4-phenyl-1,2,3,6-tetrahydropyridine	MPTP Poisoning	D015632	1-Methyl-4-phenyl-1,2,3,6-tetrahydropyridine	28289-54-5	DTXSID8040933	1994	8028787	Iron accumulation in the substantia nigra of 1-methyl-4-phenyl-1,2,3,6-tetrahydropyridine (MPTP)-induced hemiparkinsonian monkeys.	8028787	Neurotoxicity Syndromes	D020267	MPTP Poisoning	DTXSID8040933
1-Methyl-4-phenyl-1,2,3,6-tetrahydropyridine	MPTP Poisoning	D015632	1-Methyl-4-phenyl-1,2,3,6-tetrahydropyridine	28289-54-5	DTXSID8040933	1993	8469305	Stable parkinsonian syndrome and uneven loss of striatal dopamine fibres following chronic MPTP administration in baboons.	8469305	Neurotoxicity Syndromes	D020267	MPTP Poisoning	DTXSID8040933
1-Methyl-4-phenyl-1,2,3,6-tetrahydropyridine	MPTP Poisoning	D015632	1-Methyl-4-phenyl-1,2,3,6-tetrahydropyridine	28289-54-5	DTXSID8040933	1994	8028778	Alteration of pallidal cholinergic activity in MPTP-treated monkeys: effect of dihydro-alpha-ergocryptine (DEK).	8028778	Neurotoxicity Syndromes	D020267	MPTP Poisoning	DTXSID8040933
1-Methyl-4-phenyl-1,2,3,6-tetrahydropyridine	MPTP Poisoning	D015632	1-Methyl-4-phenyl-1,2,3,6-tetrahydropyridine	28289-54-5	DTXSID8040933	1993	8247275	Does neuromelanin contribute to the vulnerability of catecholaminergic neurons in monkeys intoxicated with MPTP?	8247275	Neurotoxicity Syndromes	D020267	MPTP Poisoning	DTXSID8040933
1-Methyl-4-phenyl-1,2,3,6-tetrahydropyridine	MPTP Poisoning	D015632	1-Methyl-4-phenyl-1,2,3,6-tetrahydropyridine	28289-54-5	DTXSID8040933	1994	7851473	Antiparkinsonian activity of talipexole in MPTP-treated monkeys: in combination with L-dopa and as chronic treatment.	7851473	Neurotoxicity Syndromes	D020267	MPTP Poisoning	DTXSID8040933
1-Methyl-4-phenyl-1,2,3,6-tetrahydropyridine	MPTP Poisoning	D015632	1-Methyl-4-phenyl-1,2,3,6-tetrahydropyridine	28289-54-5	DTXSID8040933	1993	8243537	L-deprenyl confers specific protection against MPTP-induced Parkinson's disease-like movement disorder in the goldfish.	8243537	Neurotoxicity Syndromes	D020267	MPTP Poisoning	DTXSID8040933
1-Methyl-4-phenyl-1,2,3,6-tetrahydropyridine	MPTP Poisoning	D015632	1-Methyl-4-phenyl-1,2,3,6-tetrahydropyridine	28289-54-5	DTXSID8040933	1994	7838312	Potential parkinsonian protoxicants within and without.	7838312	Neurotoxicity Syndromes	D020267	MPTP Poisoning	DTXSID8040933
1-Methyl-4-phenyl-1,2,3,6-tetrahydropyridine	MPTP Poisoning	D015632	1-Methyl-4-phenyl-1,2,3,6-tetrahydropyridine	28289-54-5	DTXSID8040933	1994	8263548	Modulatory effects of testosterone on 1-methyl-4-phenyl-1,2,3,6-tetrahydropyridine-induced neurotoxicity.	8263548	Neurotoxicity Syndromes	D020267	MPTP Poisoning	DTXSID8040933
1-Methyl-4-phenyl-1,2,3,6-tetrahydropyridine	MPTP Poisoning	D015632	1-Methyl-4-phenyl-1,2,3,6-tetrahydropyridine	28289-54-5	DTXSID8040933	1993	8512193	The goldfish as a drug discovery vehicle for Parkinson's disease and other neurodegenerative disorders.	8512193	Neurotoxicity Syndromes	D020267	MPTP Poisoning	DTXSID8040933
1-Methyl-4-phenyl-1,2,3,6-tetrahydropyridine	MPTP Poisoning	D015632	1-Methyl-4-phenyl-1,2,3,6-tetrahydropyridine	28289-54-5	DTXSID8040933	1994	7970192	MPTP-induced parkinsonism in primates: pattern of striatal dopamine loss following acute and chronic administration.	7970192	Neurotoxicity Syndromes	D020267	MPTP Poisoning	DTXSID8040933
1-Methyl-4-phenyl-1,2,3,6-tetrahydropyridine	MPTP Poisoning	D015632	1-Methyl-4-phenyl-1,2,3,6-tetrahydropyridine	28289-54-5	DTXSID8040933	1993	8095431	Differential effect of chronic dopaminergic treatment on dopamine D1 and D2 receptors in the monkey brain in MPTP-induced parkinsonism.	8095431	Neurotoxicity Syndromes	D020267	MPTP Poisoning	DTXSID8040933
1-Methyl-4-phenyl-1,2,3,6-tetrahydropyridine	MPTP Poisoning	D015632	1-Methyl-4-phenyl-1,2,3,6-tetrahydropyridine	28289-54-5	DTXSID8040933	1994	8177363	Parkinson-like disease by 1-methyl-4-phenyl-1,2,3,6-tetrahydropyridine (MPTP) toxicity in Macaca fascicularis: synaptosomal metabolism and action of dihydroergocriptine.	8177363	Neurotoxicity Syndromes	D020267	MPTP Poisoning	DTXSID8040933
1-Methyl-4-phenyl-1,2,3,6-tetrahydropyridine	MPTP Poisoning	D015632	1-Methyl-4-phenyl-1,2,3,6-tetrahydropyridine	28289-54-5	DTXSID8040933	1993	8094427	Behavioral tolerance to repeated apomorphine administration in parkinsonian monkeys.	8094427	Neurotoxicity Syndromes	D020267	MPTP Poisoning	DTXSID8040933
1-Methyl-4-phenyl-1,2,3,6-tetrahydropyridine	MPTP Poisoning	D015632	1-Methyl-4-phenyl-1,2,3,6-tetrahydropyridine	28289-54-5	DTXSID8040933	1993	8098931	Effects of terguride, a partial D2 agonist, on MPTP-lesioned parkinsonian cynomolgus monkeys.	8098931	Neurotoxicity Syndromes	D020267	MPTP Poisoning	DTXSID8040933
1-Methyl-4-phenyl-1,2,3,6-tetrahydropyridine	MPTP Poisoning	D015632	1-Methyl-4-phenyl-1,2,3,6-tetrahydropyridine	28289-54-5	DTXSID8040933	1996	8684621	Metabolic activity of the basal ganglia in parkinsonian syndromes in human and non-human primates: a cytochrome oxidase histochemistry study.	8684621	Neurotoxicity Syndromes	D020267	MPTP Poisoning	DTXSID8040933
1-Methyl-4-phenyl-1,2,3,6-tetrahydropyridine	MPTP Poisoning	D015632	1-Methyl-4-phenyl-1,2,3,6-tetrahydropyridine	28289-54-5	DTXSID8040933	1993	8105418	Chronic administration of 1-methyl-4-phenyl-1,2,3,6-tetrahydropyridine to monkeys: behavioural, morphological and biochemical correlates.	8105418	Neurotoxicity Syndromes	D020267	MPTP Poisoning	DTXSID8040933
1-Methyl-4-phenyl-1,2,3,6-tetrahydropyridine	MPTP Poisoning	D015632	1-Methyl-4-phenyl-1,2,3,6-tetrahydropyridine	28289-54-5	DTXSID8040933	1993	7509198	6-[18F]fluoro-L-dopa and cerebral blood flow in unilaterally MPTP-treated monkeys.	7509198	Neurotoxicity Syndromes	D020267	MPTP Poisoning	DTXSID8040933
1-Methyl-4-phenyl-1,2,3,6-tetrahydropyridine	MPTP Poisoning	D015632	1-Methyl-4-phenyl-1,2,3,6-tetrahydropyridine	28289-54-5	DTXSID8040933	1996	9280455	[The effect of liposomal form of L-Dopa on the level of dopamine, its metabolites, and phospholipid metabolism in the striatum of mice with experimental parkinsonian syndrome].	9280455	Neurotoxicity Syndromes	D020267	MPTP Poisoning	DTXSID8040933
1-Methyl-4-phenyl-1,2,3,6-tetrahydropyridine	MPTP Poisoning	D015632	1-Methyl-4-phenyl-1,2,3,6-tetrahydropyridine	28289-54-5	DTXSID8040933	1998	9518590	Effects of L-DOPA on neuronal activity of the globus pallidus externalis (GPe) and globus pallidus internalis (GPi) in the MPTP-treated monkey.	9518590	Neurotoxicity Syndromes	D020267	MPTP Poisoning	DTXSID8040933
1-Methyl-4-phenyl-1,2,3,6-tetrahydropyridine	MPTP Poisoning	D015632	1-Methyl-4-phenyl-1,2,3,6-tetrahydropyridine	28289-54-5	DTXSID8040933	1997	9163560	Talipexole or pramipexole combinations with chloro-APB (SKF 82958) in MPTP-induced hemiparkinsonian monkeys.	9163560	Neurotoxicity Syndromes	D020267	MPTP Poisoning	DTXSID8040933
1-Methyl-4-phenyl-1,2,3,6-tetrahydropyridine	MPTP Poisoning	D015632	1-Methyl-4-phenyl-1,2,3,6-tetrahydropyridine	28289-54-5	DTXSID8040933	1996	8819134	Microglial reaction in MPTP (1-methyl-4-phenyl-1,2,3,6-tetrahydropyridine) induced Parkinson's disease mice model.	8819134	Neurotoxicity Syndromes	D020267	MPTP Poisoning	DTXSID8040933
1-Methyl-4-phenyl-1,2,3,6-tetrahydropyridine	MPTP Poisoning	D015632	1-Methyl-4-phenyl-1,2,3,6-tetrahydropyridine	28289-54-5	DTXSID8040933	1998	9756328	Glial cell line-derived neurotrophic factor protects against 1-methyl-4-phenyl-1,2,3,6-tetrahydropyridine (MPTP)-induced neurotoxicity in C57BL/6 mice.	9756328	Neurotoxicity Syndromes	D020267	MPTP Poisoning	DTXSID8040933
1-Methyl-4-phenyl-1,2,3,6-tetrahydropyridine	MPTP Poisoning	D015632	1-Methyl-4-phenyl-1,2,3,6-tetrahydropyridine	28289-54-5	DTXSID8040933	1997	9398471	Effects of different schedules of MPTP administration on dopaminergic neurodegeneration in mice.	9398471	Neurotoxicity Syndromes	D020267	MPTP Poisoning	DTXSID8040933
1-Methyl-4-phenyl-1,2,3,6-tetrahydropyridine	MPTP Poisoning	D015632	1-Methyl-4-phenyl-1,2,3,6-tetrahydropyridine	28289-54-5	DTXSID8040933	1996	8974482	[Sleep disorders and impaired learning ability in rats with parkinsonian syndrome induced by MPTP].	8974482	Neurotoxicity Syndromes	D020267	MPTP Poisoning	DTXSID8040933
1-Methyl-4-phenyl-1,2,3,6-tetrahydropyridine	MPTP Poisoning	D015632	1-Methyl-4-phenyl-1,2,3,6-tetrahydropyridine	28289-54-5	DTXSID8040933	1997	9195598	Species differences in the role of excitatory amino acids in experimental parkinsonism.	9195598	Neurotoxicity Syndromes	D020267	MPTP Poisoning	DTXSID8040933
1-Methyl-4-phenyl-1,2,3,6-tetrahydropyridine	MPTP Poisoning	D015632	1-Methyl-4-phenyl-1,2,3,6-tetrahydropyridine	28289-54-5	DTXSID8040933	1998	9613716	Mechanisms of MPTP toxicity.	9613716	Neurotoxicity Syndromes	D020267	MPTP Poisoning	DTXSID8040933
1-Methyl-4-phenyl-1,2,3,6-tetrahydropyridine	MPTP Poisoning	D015632	1-Methyl-4-phenyl-1,2,3,6-tetrahydropyridine	28289-54-5	DTXSID8040933	1998	9635986	N-methyl-(R)-salsolinol and Parkinson's disease.	9635986	Neurotoxicity Syndromes	D020267	MPTP Poisoning	DTXSID8040933
1-Methyl-4-phenyl-1,2,3,6-tetrahydropyridine	MPTP Poisoning	D015632	1-Methyl-4-phenyl-1,2,3,6-tetrahydropyridine	28289-54-5	DTXSID8040933	1998	9668361	Effects of GM1 ganglioside treatment on dopamine innervation of the striatum of MPTP-treated mice.	9668361	Neurotoxicity Syndromes	D020267	MPTP Poisoning	DTXSID8040933
1-Methyl-4-phenyl-1,2,3,6-tetrahydropyridine	MPTP Poisoning	D015632	1-Methyl-4-phenyl-1,2,3,6-tetrahydropyridine	28289-54-5	DTXSID8040933	1998	9473580	MPTP-Parkinsonism is accompanied by persistent expression of a delta-FosB-like protein in dopaminergic pathways.	9473580	Neurotoxicity Syndromes	D020267	MPTP Poisoning	DTXSID8040933
1-Methyl-4-phenyl-1,2,3,6-tetrahydropyridine	MPTP Poisoning	D015632	1-Methyl-4-phenyl-1,2,3,6-tetrahydropyridine	28289-54-5	DTXSID8040933	1998	9754903	Microglial and astrocytic involvement in a murine model of Parkinson's disease induced by 1-methyl-4-phenyl-1,2,3,6-tetrahydropyridine (MPTP).	9754903	Neurotoxicity Syndromes	D020267	MPTP Poisoning	DTXSID8040933
1-Methyl-4-phenyl-1,2,3,6-tetrahydropyridine	MPTP Poisoning	D015632	1-Methyl-4-phenyl-1,2,3,6-tetrahydropyridine	28289-54-5	DTXSID8040933	1998	9710523	Trihexyphenidyl potentiation of L-DOPA: reduced effectiveness three years later in MPTP-induced chronic hemiparkinsonian monkeys.	9710523	Neurotoxicity Syndromes	D020267	MPTP Poisoning	DTXSID8040933
1-Methyl-4-phenyl-1,2,3,6-tetrahydropyridine	MPTP Poisoning	D015632	1-Methyl-4-phenyl-1,2,3,6-tetrahydropyridine	28289-54-5	DTXSID8040933	1997	9126147	Neuroprotective therapy for Parkinson's disease.	9126147	Neurotoxicity Syndromes	D020267	MPTP Poisoning	DTXSID8040933
1-Methyl-4-phenyl-1,2,3,6-tetrahydropyridine	MPTP Poisoning	D015632	1-Methyl-4-phenyl-1,2,3,6-tetrahydropyridine	28289-54-5	DTXSID8040933	1998	9860271	Efferent synaptic connections of dopaminergic neurons grafted into the caudate nucleus of experimentally induced parkinsonian monkeys are different from those of control animals.	9860271	Neurotoxicity Syndromes	D020267	MPTP Poisoning	DTXSID8040933
1-Methyl-4-phenyl-1,2,3,6-tetrahydropyridine	MPTP Poisoning	D015632	1-Methyl-4-phenyl-1,2,3,6-tetrahydropyridine	28289-54-5	DTXSID8040933	1997	9396088	Comparison of key steps in 1-methyl-4-phenyl-1,2,3,6-tetrahydropyridine (MPTP) neurotoxicity in rodents.	9396088	Neurotoxicity Syndromes	D020267	MPTP Poisoning	DTXSID8040933
1-Methyl-4-phenyl-1,2,3,6-tetrahydropyridine	MPTP Poisoning	D015632	1-Methyl-4-phenyl-1,2,3,6-tetrahydropyridine	28289-54-5	DTXSID8040933	1996	9001722	1-Methyl-4-phenyl-1,2,3,6-tetrahydropyridine-induced neurotoxicity in non-human primates is antagonized by pretreatment with nimodipine at the nigral, but not at the striatal level.	9001722	Neurotoxicity Syndromes	D020267	MPTP Poisoning	DTXSID8040933
1-Methyl-4-phenyl-1,2,3,6-tetrahydropyridine	MPTP Poisoning	D015632	1-Methyl-4-phenyl-1,2,3,6-tetrahydropyridine	28289-54-5	DTXSID8040933	1998	9710520	MPTP-Induced hemiparkinsonism in nonhuman primates 6-8 years after a single unilateral intracarotid dose.	9710520	Neurotoxicity Syndromes	D020267	MPTP Poisoning	DTXSID8040933
1-Methyl-4-phenyl-1,2,3,6-tetrahydropyridine	MPTP Poisoning	D015632	1-Methyl-4-phenyl-1,2,3,6-tetrahydropyridine	28289-54-5	DTXSID8040933	1996	8915594	Effects of L-DOPA-therapy on dopamine D2 receptor mRNA expression in the striatum of MPTP-intoxicated parkinsonian monkeys.	8915594	Neurotoxicity Syndromes	D020267	MPTP Poisoning	DTXSID8040933
1-Methyl-4-phenyl-1,2,3,6-tetrahydropyridine	MPTP Poisoning	D015632	1-Methyl-4-phenyl-1,2,3,6-tetrahydropyridine	28289-54-5	DTXSID8040933	1989	2689379	Animal models of parkinsonism using selective neurotoxins: clinical and basic implications.	2689379	Neurotoxicity Syndromes	D020267	MPTP Poisoning	DTXSID8040933
1-Methyl-4-phenyl-1,2,3,6-tetrahydropyridine	MPTP Poisoning	D015632	1-Methyl-4-phenyl-1,2,3,6-tetrahydropyridine	28289-54-5	DTXSID8040933	2015	26205255	Lack of additive role of ageing in nigrostriatal neurodegeneration triggered by α-synuclein overexpression.	26205255	Neurotoxicity Syndromes	D020267	MPTP Poisoning	DTXSID8040933
1-Methyl-4-phenyl-1,2,3,6-tetrahydropyridine	MPTP Poisoning	D015632	1-Methyl-4-phenyl-1,2,3,6-tetrahydropyridine	28289-54-5	DTXSID8040933	1989	2586750	Neural mechanisms underlying parkinsonian symptoms based upon regional uptake of 2-deoxyglucose in monkeys exposed to 1-methyl-4-phenyl-1,2,3,6-tetrahydropyridine.	2586750	Neurotoxicity Syndromes	D020267	MPTP Poisoning	DTXSID8040933
1-Methyl-4-phenyl-1,2,3,6-tetrahydropyridine	MPTP Poisoning	D015632	1-Methyl-4-phenyl-1,2,3,6-tetrahydropyridine	28289-54-5	DTXSID8040933	2016	26451750	Dopaminergic lesioning impairs adult hippocampal neurogenesis by distinct modification of α-synuclein.	26451750	Neurotoxicity Syndromes	D020267	MPTP Poisoning	DTXSID8040933
1-Methyl-4-phenyl-1,2,3,6-tetrahydropyridine	MPTP Poisoning	D015632	1-Methyl-4-phenyl-1,2,3,6-tetrahydropyridine	28289-54-5	DTXSID8040933	2016	27213850	Neural Stem Cells Derived from Human Parthenogenetic Stem Cells Engraft and Promote Recovery in a Nonhuman Primate Model of Parkinson's Disease.	27213850	Neurotoxicity Syndromes	D020267	MPTP Poisoning	DTXSID8040933
1-Methyl-4-phenyl-1,2,3,6-tetrahydropyridine	MPTP Poisoning	D015632	1-Methyl-4-phenyl-1,2,3,6-tetrahydropyridine	28289-54-5	DTXSID8040933	2016	26431624	Progression and recovery of Parkinsonism in a chronic progressive MPTP-induction model in the marmoset without persistent molecular and cellular damage.	26431624	Neurotoxicity Syndromes	D020267	MPTP Poisoning	DTXSID8040933
1-Methyl-4-phenyl-1,2,3,6-tetrahydropyridine	MPTP Poisoning	D015632	1-Methyl-4-phenyl-1,2,3,6-tetrahydropyridine	28289-54-5	DTXSID8040933	2016	27395789	Nimodipine, an L-type calcium channel blocker attenuates mitochondrial dysfunctions to protect against 1-methyl-4-phenyl-1,2,3,6-tetrahydropyridine-induced Parkinsonism in mice.	27395789	Neurotoxicity Syndromes	D020267	MPTP Poisoning	DTXSID8040933
1-Methyl-4-phenyl-1,2,3,6-tetrahydropyridine	MPTP Poisoning	D015632	1-Methyl-4-phenyl-1,2,3,6-tetrahydropyridine	28289-54-5	DTXSID8040933	2016	26511587	Evidence for a role of adaptive immune response in the disease pathogenesis of the MPTP mouse model of Parkinson's disease.	26511587	Neurotoxicity Syndromes	D020267	MPTP Poisoning	DTXSID8040933
1-Methyl-4-phenyl-1,2,3,6-tetrahydropyridine	MPTP Poisoning	D015632	1-Methyl-4-phenyl-1,2,3,6-tetrahydropyridine	28289-54-5	DTXSID8040933	1989	2687716	Effect of the NMDA antagonist MK-801 on MPTP-induced parkinsonism in the monkey.	2687716	Neurotoxicity Syndromes	D020267	MPTP Poisoning	DTXSID8040933
1-Methyl-4-phenyl-1,2,3,6-tetrahydropyridine	MPTP Poisoning	D015632	1-Methyl-4-phenyl-1,2,3,6-tetrahydropyridine	28289-54-5	DTXSID8040933	2016	27182044	MPTP neurotoxicity is highly concordant between the sexes among BXD recombinant inbred mouse strains.	27182044	Neurotoxicity Syndromes	D020267	MPTP Poisoning	DTXSID8040933
1-Methyl-4-phenyl-1,2,3,6-tetrahydropyridine	MPTP Poisoning	D015632	1-Methyl-4-phenyl-1,2,3,6-tetrahydropyridine	28289-54-5	DTXSID8040933	2014	25665403	[Moving activity and wakefulness-sleep cycle changes in a mouse MPTP model of Parkinson's disease].	25665403	Neurotoxicity Syndromes	D020267	MPTP Poisoning	DTXSID8040933
1-Methyl-4-phenyl-1,2,3,6-tetrahydropyridine	MPTP Poisoning	D015632	1-Methyl-4-phenyl-1,2,3,6-tetrahydropyridine	28289-54-5	DTXSID8040933	2017	28181071	Neurotrophic Effect of Asiatic acid, a Triterpene of Centella asiatica Against Chronic 1-Methyl 4-Phenyl 1, 2, 3, 6-Tetrahydropyridine Hydrochloride/Probenecid Mouse Model of Parkinson's disease: The Role of MAPK, PI3K-Akt-GSK3β and mTOR Signalling Pathways.	28181071	Neurotoxicity Syndromes	D020267	MPTP Poisoning	DTXSID8040933
1-Methyl-4-phenyl-1,2,3,6-tetrahydropyridine	MPTP Poisoning	D015632	1-Methyl-4-phenyl-1,2,3,6-tetrahydropyridine	28289-54-5	DTXSID8040933	2017	28082123	Nicotine suppresses the neurotoxicity by MPP+/MPTP through activating α7nAChR/PI3K/Trx-1 and suppressing ER stress.	28082123	Neurotoxicity Syndromes	D020267	MPTP Poisoning	DTXSID8040933
1-Methyl-4-phenyl-1,2,3,6-tetrahydropyridine	MPTP Poisoning	D015632	1-Methyl-4-phenyl-1,2,3,6-tetrahydropyridine	28289-54-5	DTXSID8040933	2015	25581060	Systemically administered neuregulin-1β1 rescues nigral dopaminergic neurons via the ErbB4 receptor tyrosine kinase in MPTP mouse models of Parkinson's disease.	25581060	Neurotoxicity Syndromes	D020267	MPTP Poisoning	DTXSID8040933
1-Methyl-4-phenyl-1,2,3,6-tetrahydropyridine	MPTP Poisoning	D015632	1-Methyl-4-phenyl-1,2,3,6-tetrahydropyridine	28289-54-5	DTXSID8040933	2016	26500044	Chronic and progressive Parkinson's disease MPTP model in adult and aged mice.	26500044	Neurotoxicity Syndromes	D020267	MPTP Poisoning	DTXSID8040933
1-Methyl-4-phenyl-1,2,3,6-tetrahydropyridine	MPTP Poisoning	D015632	1-Methyl-4-phenyl-1,2,3,6-tetrahydropyridine	28289-54-5	DTXSID8040933	2015	25857436	Ferulic acid pretreatment mitigates MPTP-induced motor impairment and histopathological alterations in C57BL/6 mice.	25857436	Neurotoxicity Syndromes	D020267	MPTP Poisoning	DTXSID8040933
1-Methyl-4-phenyl-1,2,3,6-tetrahydropyridine	MPTP Poisoning	D015632	1-Methyl-4-phenyl-1,2,3,6-tetrahydropyridine	28289-54-5	DTXSID8040933	1989	2622529	Symptomatic and asymptomatic 1-methyl-4-phenyl-1,2,3,6-tetrahydropyridine-treated primates: biochemical changes in striatal regions.	2622529	Neurotoxicity Syndromes	D020267	MPTP Poisoning	DTXSID8040933
1-Methyl-4-phenyl-1,2,3,6-tetrahydropyridine	MPTP Poisoning	D015632	1-Methyl-4-phenyl-1,2,3,6-tetrahydropyridine	28289-54-5	DTXSID8040933	2015	26215120	Transiently impaired neurogenesis in MPTP mouse model of Parkinson's disease.	26215120	Neurotoxicity Syndromes	D020267	MPTP Poisoning	DTXSID8040933
1-Methyl-4-phenyl-1,2,3,6-tetrahydropyridine	MPTP Poisoning	D015632	1-Methyl-4-phenyl-1,2,3,6-tetrahydropyridine	28289-54-5	DTXSID8040933	2016	26453962	Neuroprotective effects of a GIP analogue in the MPTP Parkinson's disease mouse model.	26453962	Neurotoxicity Syndromes	D020267	MPTP Poisoning	DTXSID8040933
1-Methyl-4-phenyl-1,2,3,6-tetrahydropyridine	MPTP Poisoning	D015632	1-Methyl-4-phenyl-1,2,3,6-tetrahydropyridine	28289-54-5	DTXSID8040933	2016	26996132	Deferoxamine-mediated up-regulation of HIF-1α prevents dopaminergic neuronal death via the activation of MAPK family proteins in MPTP-treated mice.	26996132	Neurotoxicity Syndromes	D020267	MPTP Poisoning	DTXSID8040933
1-Methyl-4-phenyl-1,2,3,6-tetrahydropyridine	MPTP Poisoning	D015632	1-Methyl-4-phenyl-1,2,3,6-tetrahydropyridine	28289-54-5	DTXSID8040933	2015	26415982	The adenosine A2A receptor antagonist, istradefylline enhances anti-parkinsonian activity induced by combined treatment with low doses of L-DOPA and dopamine agonists in MPTP-treated common marmosets.	26415982	Neurotoxicity Syndromes	D020267	MPTP Poisoning	DTXSID8040933
1-Methyl-4-phenyl-1,2,3,6-tetrahydropyridine	MPTP Poisoning	D015632	1-Methyl-4-phenyl-1,2,3,6-tetrahydropyridine	28289-54-5	DTXSID8040933	2016	26979073	Long Non-coding RNA HOTAIR Promotes Parkinson's Disease Induced by MPTP Through up-regulating the Expression of LRRK2.	26979073	Neurotoxicity Syndromes	D020267	MPTP Poisoning	DTXSID8040933
1-Methyl-4-phenyl-1,2,3,6-tetrahydropyridine	MPTP Poisoning	D015632	1-Methyl-4-phenyl-1,2,3,6-tetrahydropyridine	28289-54-5	DTXSID8040933	2016	26918675	A novel dual GLP-1 and GIP incretin receptor agonist is neuroprotective in a mouse model of Parkinson's disease by reducing chronic inflammation in the brain.	26918675	Neurotoxicity Syndromes	D020267	MPTP Poisoning	DTXSID8040933
1-Methyl-4-phenyl-1,2,3,6-tetrahydropyridine	MPTP Poisoning	D015632	1-Methyl-4-phenyl-1,2,3,6-tetrahydropyridine	28289-54-5	DTXSID8040933	2016	26961958	Ghrelin-AMPK Signaling Mediates the Neuroprotective Effects of Calorie Restriction in Parkinson's Disease.	26961958	Neurotoxicity Syndromes	D020267	MPTP Poisoning	DTXSID8040933
1-Methyl-4-phenyl-1,2,3,6-tetrahydropyridine	MPTP Poisoning	D015632	1-Methyl-4-phenyl-1,2,3,6-tetrahydropyridine	28289-54-5	DTXSID8040933	1989	2637935	MPTP-induced Parkinson-like disease in sheep: clinical and pathologic findings.	2637935	Neurotoxicity Syndromes	D020267	MPTP Poisoning	DTXSID8040933
1-Methyl-4-phenyl-1,2,3,6-tetrahydropyridine	MPTP Poisoning	D015632	1-Methyl-4-phenyl-1,2,3,6-tetrahydropyridine	28289-54-5	DTXSID8040933	2016	27265894	Neuroprotective and anti-inflammatory effects of morin in a murine model of Parkinson's disease.	27265894	Neurotoxicity Syndromes	D020267	MPTP Poisoning	DTXSID8040933
1-Methyl-4-phenyl-1,2,3,6-tetrahydropyridine	MPTP Poisoning	D015632	1-Methyl-4-phenyl-1,2,3,6-tetrahydropyridine	28289-54-5	DTXSID8040933	2016	27012392	Physical exercise counteracts MPTP-induced changes in neural precursor cell proliferation in the hippocampus and restores spatial learning but not memory performance in the water maze.	27012392	Neurotoxicity Syndromes	D020267	MPTP Poisoning	DTXSID8040933
1-Methyl-4-phenyl-1,2,3,6-tetrahydropyridine	MPTP Poisoning	D015632	1-Methyl-4-phenyl-1,2,3,6-tetrahydropyridine	28289-54-5	DTXSID8040933	2015	25796140	HIF1α is necessary for exercise-induced neuroprotection while HIF2α is needed for dopaminergic neuron survival in the substantia nigra pars compacta.	25796140	Neurotoxicity Syndromes	D020267	MPTP Poisoning	DTXSID8040933
1-Methyl-4-phenyl-1,2,3,6-tetrahydropyridine	MPTP Poisoning	D015632	1-Methyl-4-phenyl-1,2,3,6-tetrahydropyridine	28289-54-5	DTXSID8040933	2015	25680233	Neuroprotective effects of 5-(4-hydroxy-3-dimethoxybenzylidene)-thiazolidinone in MPTP induced Parkinsonism model in mice.	25680233	Neurotoxicity Syndromes	D020267	MPTP Poisoning	DTXSID8040933
1-Methyl-4-phenyl-1,2,3,6-tetrahydropyridine	MPTP Poisoning	D015632	1-Methyl-4-phenyl-1,2,3,6-tetrahydropyridine	28289-54-5	DTXSID8040933	1989	2790469	Responses of pallidal neurons to striatal stimulation in monkeys with MPTP-induced parkinsonism.	2790469	Neurotoxicity Syndromes	D020267	MPTP Poisoning	DTXSID8040933
1-Methyl-4-phenyl-1,2,3,6-tetrahydropyridine	MPTP Poisoning	D015632	1-Methyl-4-phenyl-1,2,3,6-tetrahydropyridine	28289-54-5	DTXSID8040933	2015	26117365	Behavioural impact of a double dopaminergic and serotonergic lesion in the non-human primate.	26117365	Neurotoxicity Syndromes	D020267	MPTP Poisoning	DTXSID8040933
1-Methyl-4-phenyl-1,2,3,6-tetrahydropyridine	MPTP Poisoning	D015632	1-Methyl-4-phenyl-1,2,3,6-tetrahydropyridine	28289-54-5	DTXSID8040933	1989	2790166	[Evaluation of the capability of 1-methyl-4-phenyl-1,2,3,6-tetrahydropyridine and pyridine derivatives to evoke parkinsonism].	2790166	Neurotoxicity Syndromes	D020267	MPTP Poisoning	DTXSID8040933
1-Methyl-4-phenyl-1,2,3,6-tetrahydropyridine	MPTP Poisoning	D015632	1-Methyl-4-phenyl-1,2,3,6-tetrahydropyridine	28289-54-5	DTXSID8040933	2017	27806193	Neuroprotective Effect of a New 7,8-Dihydroxycoumarin-Based Fe2+/Cu2+ Chelator in Cell and Animal Models of Parkinson's Disease.	27806193	Neurotoxicity Syndromes	D020267	MPTP Poisoning	DTXSID8040933
1-Methyl-4-phenyl-1,2,3,6-tetrahydropyridine	MPTP Poisoning	D015632	1-Methyl-4-phenyl-1,2,3,6-tetrahydropyridine	28289-54-5	DTXSID8040933	1989	2614476	Transplantation of human sympathetic neurons and adrenal chromaffin cells into parkinsonian monkeys: no reversal of clinical symptoms.	2614476	Neurotoxicity Syndromes	D020267	MPTP Poisoning	DTXSID8040933
1-Methyl-4-phenyl-1,2,3,6-tetrahydropyridine	MPTP Poisoning	D015632	1-Methyl-4-phenyl-1,2,3,6-tetrahydropyridine	28289-54-5	DTXSID8040933	1989	2597310	MDL 72,974: a potent and selective enzyme-activated irreversible inhibitor of monoamine oxidase type B with potential for use in Parkinson's disease.	2597310	Neurotoxicity Syndromes	D020267	MPTP Poisoning	DTXSID8040933
1-Methyl-4-phenyl-1,2,3,6-tetrahydropyridine	MPTP Poisoning	D015632	1-Methyl-4-phenyl-1,2,3,6-tetrahydropyridine	28289-54-5	DTXSID8040933	2017	28108849	Toll Like Receptor 4 Affects the Cerebral Biochemical Changes Induced by MPTP Treatment.	28108849	Neurotoxicity Syndromes	D020267	MPTP Poisoning	DTXSID8040933
1-Methyl-4-phenyl-1,2,3,6-tetrahydropyridine	MPTP Poisoning	D015632	1-Methyl-4-phenyl-1,2,3,6-tetrahydropyridine	28289-54-5	DTXSID8040933	2015	25907446	Effect of serotonin transporter blockade on L-DOPA-induced dyskinesia in animal models of Parkinson's disease.	25907446	Neurotoxicity Syndromes	D020267	MPTP Poisoning	DTXSID8040933
1-Methyl-4-phenyl-1,2,3,6-tetrahydropyridine	MPTP Poisoning	D015632	1-Methyl-4-phenyl-1,2,3,6-tetrahydropyridine	28289-54-5	DTXSID8040933	2017	28442167	Tipping Points and Endogenous Determinants of Nigrostriatal Degeneration by MPTP.	28442167	Neurotoxicity Syndromes	D020267	MPTP Poisoning	DTXSID8040933
1-Methyl-4-phenyl-1,2,3,6-tetrahydropyridine	MPTP Poisoning	D015632	1-Methyl-4-phenyl-1,2,3,6-tetrahydropyridine	28289-54-5	DTXSID8040933	2017	28734031	Downregulation of DEC1 contributes to the neurotoxicity induced by MPP+ by suppressing PI3K/Akt/GSK3β pathway.	28734031	Neurotoxicity Syndromes	D020267	MPTP Poisoning	DTXSID8040933
1-Methyl-4-phenyl-1,2,3,6-tetrahydropyridine	MPTP Poisoning	D015632	1-Methyl-4-phenyl-1,2,3,6-tetrahydropyridine	28289-54-5	DTXSID8040933	2008	18036149	Spinal cord degeneration in C57BL/6N mice following induction of experimental parkinsonism with MPTP.	18036149	Neurotoxicity Syndromes	D020267	MPTP Poisoning	DTXSID8040933
1-Methyl-4-phenyl-1,2,3,6-tetrahydropyridine	MPTP Poisoning	D015632	1-Methyl-4-phenyl-1,2,3,6-tetrahydropyridine	28289-54-5	DTXSID8040933	2006	17067307	Effects of nicotinic therapies on attention and executive functions in chronic low-dose MPTP-treated monkeys.	17067307	Neurotoxicity Syndromes	D020267	MPTP Poisoning	DTXSID8040933
1-Methyl-4-phenyl-1,2,3,6-tetrahydropyridine	MPTP Poisoning	D015632	1-Methyl-4-phenyl-1,2,3,6-tetrahydropyridine	28289-54-5	DTXSID8040933	2008	18381061	Globus pallidus plays a critical role in neurotrophic factor induced functional improvements in hemiparkinsonian monkeys.	18381061	Neurotoxicity Syndromes	D020267	MPTP Poisoning	DTXSID8040933
1-Methyl-4-phenyl-1,2,3,6-tetrahydropyridine	MPTP Poisoning	D015632	1-Methyl-4-phenyl-1,2,3,6-tetrahydropyridine	28289-54-5	DTXSID8040933	2009	18700057	Iptakalim protects against MPP+-induced degeneration of dopaminergic neurons in association with astrocyte activation.	18700057	Neurotoxicity Syndromes	D020267	MPTP Poisoning	DTXSID8040933
1-Methyl-4-phenyl-1,2,3,6-tetrahydropyridine	MPTP Poisoning	D015632	1-Methyl-4-phenyl-1,2,3,6-tetrahydropyridine	28289-54-5	DTXSID8040933	2008	18648323	Pathologic modifications of alpha-synuclein in 1-methyl-4-phenyl-1,2,3,6-tetrahydropyridine (MPTP)-treated squirrel monkeys.	18648323	Neurotoxicity Syndromes	D020267	MPTP Poisoning	DTXSID8040933
1-Methyl-4-phenyl-1,2,3,6-tetrahydropyridine	MPTP Poisoning	D015632	1-Methyl-4-phenyl-1,2,3,6-tetrahydropyridine	28289-54-5	DTXSID8040933	2007	17583437	Unique responses to mitochondrial complex I inhibition in tuberoinfundibular dopamine neurons may impart resistance to toxic insult.	17583437	Neurotoxicity Syndromes	D020267	MPTP Poisoning	DTXSID8040933
1-Methyl-4-phenyl-1,2,3,6-tetrahydropyridine	MPTP Poisoning	D015632	1-Methyl-4-phenyl-1,2,3,6-tetrahydropyridine	28289-54-5	DTXSID8040933	2007	17127354	Mitochondrial toxins and neurodegenerative diseases.	17127354	Neurotoxicity Syndromes	D020267	MPTP Poisoning	DTXSID8040933
1-Methyl-4-phenyl-1,2,3,6-tetrahydropyridine	MPTP Poisoning	D015632	1-Methyl-4-phenyl-1,2,3,6-tetrahydropyridine	28289-54-5	DTXSID8040933	2008	18577498	Ghrelin antagonizes MPTP-induced neurotoxicity to the dopaminergic neurons in mouse substantia nigra.	18577498	Neurotoxicity Syndromes	D020267	MPTP Poisoning	DTXSID8040933
1-Methyl-4-phenyl-1,2,3,6-tetrahydropyridine	MPTP Poisoning	D015632	1-Methyl-4-phenyl-1,2,3,6-tetrahydropyridine	28289-54-5	DTXSID8040933	2007	18007638	A model of MPTP-induced Parkinson's disease in the goldfish.	18007638	Neurotoxicity Syndromes	D020267	MPTP Poisoning	DTXSID8040933
1-Methyl-4-phenyl-1,2,3,6-tetrahydropyridine	MPTP Poisoning	D015632	1-Methyl-4-phenyl-1,2,3,6-tetrahydropyridine	28289-54-5	DTXSID8040933	2008	18657577	A novel adenosine A(1) and A(2A) receptor antagonist ASP5854 ameliorates motor impairment in MPTP-treated marmosets: comparison with existing anti-Parkinson's disease drugs.	18657577	Neurotoxicity Syndromes	D020267	MPTP Poisoning	DTXSID8040933
1-Methyl-4-phenyl-1,2,3,6-tetrahydropyridine	MPTP Poisoning	D015632	1-Methyl-4-phenyl-1,2,3,6-tetrahydropyridine	28289-54-5	DTXSID8040933	2007	17439923	Manganese does not alter the severe neurotoxicity of MPTP.	17439923	Neurotoxicity Syndromes	D020267	MPTP Poisoning	DTXSID8040933
1-Methyl-4-phenyl-1,2,3,6-tetrahydropyridine	MPTP Poisoning	D015632	1-Methyl-4-phenyl-1,2,3,6-tetrahydropyridine	28289-54-5	DTXSID8040933	2007	17196944	Lipid-lowering drugs in the MPTP mouse model of Parkinson's disease: fenofibrate has a neuroprotective effect, whereas bezafibrate and HMG-CoA reductase inhibitors do not.	17196944	Neurotoxicity Syndromes	D020267	MPTP Poisoning	DTXSID8040933
1-Methyl-4-phenyl-1,2,3,6-tetrahydropyridine	MPTP Poisoning	D015632	1-Methyl-4-phenyl-1,2,3,6-tetrahydropyridine	28289-54-5	DTXSID8040933	2008	18808450	Caffeine protects against MPTP-induced blood-brain barrier dysfunction in mouse striatum.	18808450	Neurotoxicity Syndromes	D020267	MPTP Poisoning	DTXSID8040933
1-Methyl-4-phenyl-1,2,3,6-tetrahydropyridine	MPTP Poisoning	D015632	1-Methyl-4-phenyl-1,2,3,6-tetrahydropyridine	28289-54-5	DTXSID8040933	2008	18328479	Attenuation of MPTP neurotoxicity by rolipram, a specific inhibitor of phosphodiesterase IV.	18328479	Neurotoxicity Syndromes	D020267	MPTP Poisoning	DTXSID8040933
1-Methyl-4-phenyl-1,2,3,6-tetrahydropyridine	MPTP Poisoning	D015632	1-Methyl-4-phenyl-1,2,3,6-tetrahydropyridine	28289-54-5	DTXSID8040933	2007	17038483	Obligatory role for complex I inhibition in the dopaminergic neurotoxicity of 1-methyl-4-phenyl-1,2,3,6-tetrahydropyridine (MPTP).	17038483	Neurotoxicity Syndromes	D020267	MPTP Poisoning	DTXSID8040933
1-Methyl-4-phenyl-1,2,3,6-tetrahydropyridine	MPTP Poisoning	D015632	1-Methyl-4-phenyl-1,2,3,6-tetrahydropyridine	28289-54-5	DTXSID8040933	1991	1771272	Pyridine derivatives: structure-activity relationships causing parkinsonism-like symptoms.	1771272	Neurotoxicity Syndromes	D020267	MPTP Poisoning	DTXSID8040933
1-Methyl-4-phenyl-1,2,3,6-tetrahydropyridine	MPTP Poisoning	D015632	1-Methyl-4-phenyl-1,2,3,6-tetrahydropyridine	28289-54-5	DTXSID8040933	2008	18573265	A neuroprotective agent, T-817MA (1-{3-[2-(1-benzothiophen-5-yl)ethoxy]propyl} azetidin-3-ol maleate), prevents 1-methyl-4-phenyl-1,2,3,6-tetrahydropyridine-induced neurotoxicity in mice.	18573265	Neurotoxicity Syndromes	D020267	MPTP Poisoning	DTXSID8040933
1-Methyl-4-phenyl-1,2,3,6-tetrahydropyridine	MPTP Poisoning	D015632	1-Methyl-4-phenyl-1,2,3,6-tetrahydropyridine	28289-54-5	DTXSID8040933	2013	23893731	The yeast product Milmed enhances the effect of physical exercise on motor performance and dopamine neurochemistry recovery in MPTP-lesioned mice.	23893731	Neurotoxicity Syndromes	D020267	MPTP Poisoning	DTXSID8040933
1-Methyl-4-phenyl-1,2,3,6-tetrahydropyridine	MPTP Poisoning	D015632	1-Methyl-4-phenyl-1,2,3,6-tetrahydropyridine	28289-54-5	DTXSID8040933	2014	24726706	Neuroprotective effects of the andrographolide analogue AL-1 in the MPP⁺/MPTP-induced Parkinson's disease model in vitro and in mice.	24726706	Neurotoxicity Syndromes	D020267	MPTP Poisoning	DTXSID8040933
1-Methyl-4-phenyl-1,2,3,6-tetrahydropyridine	MPTP Poisoning	D015632	1-Methyl-4-phenyl-1,2,3,6-tetrahydropyridine	28289-54-5	DTXSID8040933	2014	24220636	Metabolic inflammation exacerbates dopaminergic neuronal degeneration in response to acute MPTP challenge in type 2 diabetes mice.	24220636	Neurotoxicity Syndromes	D020267	MPTP Poisoning	DTXSID8040933
1-Methyl-4-phenyl-1,2,3,6-tetrahydropyridine	MPTP Poisoning	D015632	1-Methyl-4-phenyl-1,2,3,6-tetrahydropyridine	28289-54-5	DTXSID8040933	2013	23375447	Antiparkinsonian activity of some 9-N-, O-, S- and C-derivatives of 3-methyl-6-(prop-1-en-2-yl)cyclohex-3-ene-1,2-diol.	23375447	Neurotoxicity Syndromes	D020267	MPTP Poisoning	DTXSID8040933
1-Methyl-4-phenyl-1,2,3,6-tetrahydropyridine	MPTP Poisoning	D015632	1-Methyl-4-phenyl-1,2,3,6-tetrahydropyridine	28289-54-5	DTXSID8040933	2014	23959162	Cholinergic manipulation of motor disability and L-DOPA-induced dyskinesia in 1-methyl-4-phenyl-1,2,3,6-tetrahydropyridine (MPTP)-treated common marmosets.	23959162	Neurotoxicity Syndromes	D020267	MPTP Poisoning	DTXSID8040933
1-Methyl-4-phenyl-1,2,3,6-tetrahydropyridine	MPTP Poisoning	D015632	1-Methyl-4-phenyl-1,2,3,6-tetrahydropyridine	28289-54-5	DTXSID8040933	2014	25127682	Neuroprotective effects of peroxisome proliferator-activated receptor alpha and gamma agonists in model of parkinsonism induced by intranigral 1-methyl-4-phenyl-1,2,3,6-tetrahyropyridine.	25127682	Neurotoxicity Syndromes	D020267	MPTP Poisoning	DTXSID8040933
1-Methyl-4-phenyl-1,2,3,6-tetrahydropyridine	MPTP Poisoning	D015632	1-Methyl-4-phenyl-1,2,3,6-tetrahydropyridine	28289-54-5	DTXSID8040933	2014	24744393	Human neural stem cells survive long term in the midbrain of dopamine-depleted monkeys after GDNF overexpression and project neurites toward an appropriate target.	24744393	Neurotoxicity Syndromes	D020267	MPTP Poisoning	DTXSID8040933
1-Methyl-4-phenyl-1,2,3,6-tetrahydropyridine	MPTP Poisoning	D015632	1-Methyl-4-phenyl-1,2,3,6-tetrahydropyridine	28289-54-5	DTXSID8040933	2013	23820985	Intranasal and subcutaneous administration of dopamine D3 receptor agonists functionally restores nigrostriatal dopamine in MPTP-treated mice.	23820985	Neurotoxicity Syndromes	D020267	MPTP Poisoning	DTXSID8040933
1-Methyl-4-phenyl-1,2,3,6-tetrahydropyridine	MPTP Poisoning	D015632	1-Methyl-4-phenyl-1,2,3,6-tetrahydropyridine	28289-54-5	DTXSID8040933	2014	24140863	The role of thioredoxin-1 in suppression of endoplasmic reticulum stress in Parkinson disease.	24140863	Neurotoxicity Syndromes	D020267	MPTP Poisoning	DTXSID8040933
1-Methyl-4-phenyl-1,2,3,6-tetrahydropyridine	MPTP Poisoning	D015632	1-Methyl-4-phenyl-1,2,3,6-tetrahydropyridine	28289-54-5	DTXSID8040933	2013	23670541	Microtubule alterations occur early in experimental parkinsonism and the microtubule stabilizer epothilone D is neuroprotective.	23670541	Neurotoxicity Syndromes	D020267	MPTP Poisoning	DTXSID8040933
1-Methyl-4-phenyl-1,2,3,6-tetrahydropyridine	MPTP Poisoning	D015632	1-Methyl-4-phenyl-1,2,3,6-tetrahydropyridine	28289-54-5	DTXSID8040933	1990	2350702	MPTP-induced parkinsonism: relative changes in dopamine concentration in subregions of substantia nigra, ventral tegmental area and retrorubral field of symptomatic and asymptomatic vervet monkeys.	2350702	Neurotoxicity Syndromes	D020267	MPTP Poisoning	DTXSID8040933
1-Methyl-4-phenyl-1,2,3,6-tetrahydropyridine	MPTP Poisoning	D015632	1-Methyl-4-phenyl-1,2,3,6-tetrahydropyridine	28289-54-5	DTXSID8040933	2014	25038418	Neuroprotection by Orexin-A via HIF-1α induction in a cellular model of Parkinson's disease.	25038418	Neurotoxicity Syndromes	D020267	MPTP Poisoning	DTXSID8040933
1-Methyl-4-phenyl-1,2,3,6-tetrahydropyridine	MPTP Poisoning	D015632	1-Methyl-4-phenyl-1,2,3,6-tetrahydropyridine	28289-54-5	DTXSID8040933	1990	2393218	Pharmacological correction of CNS functional disorders and parkinsonian syndrome in old animals.	2393218	Neurotoxicity Syndromes	D020267	MPTP Poisoning	DTXSID8040933
1-Methyl-4-phenyl-1,2,3,6-tetrahydropyridine	MPTP Poisoning	D015632	1-Methyl-4-phenyl-1,2,3,6-tetrahydropyridine	28289-54-5	DTXSID8040933	2013	23810671	Anti-inflammatory and anti-apoptotic effects of (RS)-glucoraphanin bioactivated with myrosinase in murine sub-acute and acute MPTP-induced Parkinson's disease.	23810671	Neurotoxicity Syndromes	D020267	MPTP Poisoning	DTXSID8040933
1-Methyl-4-phenyl-1,2,3,6-tetrahydropyridine	MPTP Poisoning	D015632	1-Methyl-4-phenyl-1,2,3,6-tetrahydropyridine	28289-54-5	DTXSID8040933	2013	24055409	Trasferrin receptor 2 gene regulation by microRNA 221 in SH-SY5Y cells treated with MPP⁺ as Parkinson's disease cellular model.	24055409	Neurotoxicity Syndromes	D020267	MPTP Poisoning	DTXSID8040933
1-Methyl-4-phenyl-1,2,3,6-tetrahydropyridine	MPTP Poisoning	D015632	1-Methyl-4-phenyl-1,2,3,6-tetrahydropyridine	28289-54-5	DTXSID8040933	2013	23876367	Neuroprotective effects of madecassoside in early stage of Parkinson's disease induced by MPTP in rats.	23876367	Neurotoxicity Syndromes	D020267	MPTP Poisoning	DTXSID8040933
1-Methyl-4-phenyl-1,2,3,6-tetrahydropyridine	MPTP Poisoning	D015632	1-Methyl-4-phenyl-1,2,3,6-tetrahydropyridine	28289-54-5	DTXSID8040933	2013	23902361	Dopamine receptor 3 might be an essential molecule in 1-methyl-4-phenyl-1,2,3,6-tetrahydropyridine-induced neurotoxicity.	23902361	Neurotoxicity Syndromes	D020267	MPTP Poisoning	DTXSID8040933
1-Methyl-4-phenyl-1,2,3,6-tetrahydropyridine	MPTP Poisoning	D015632	1-Methyl-4-phenyl-1,2,3,6-tetrahydropyridine	28289-54-5	DTXSID8040933	1990	2357577	Evaluation of a 1-methyl-4-phenyl-1,2,3,6-tetrahydropyridine (MPTP)-treated C57 black mouse model for parkinsonism.	2357577	Neurotoxicity Syndromes	D020267	MPTP Poisoning	DTXSID8040933
1-Methyl-4-phenyl-1,2,3,6-tetrahydropyridine	MPTP Poisoning	D015632	1-Methyl-4-phenyl-1,2,3,6-tetrahydropyridine	28289-54-5	DTXSID8040933	2006	16464239	Pramipexole protects against MPTP toxicity in non-human primates.	16464239	Neurotoxicity Syndromes	D020267	MPTP Poisoning	DTXSID8040933
1-Methyl-4-phenyl-1,2,3,6-tetrahydropyridine	MPTP Poisoning	D015632	1-Methyl-4-phenyl-1,2,3,6-tetrahydropyridine	28289-54-5	DTXSID8040933	1992	1613817	MPTP-induced parkinsonism: acceleration of biochemical and behavioral recovery by GM1 ganglioside treatment.	1613817	Neurotoxicity Syndromes	D020267	MPTP Poisoning	DTXSID8040933
1-Methyl-4-phenyl-1,2,3,6-tetrahydropyridine	MPTP Poisoning	D015632	1-Methyl-4-phenyl-1,2,3,6-tetrahydropyridine	28289-54-5	DTXSID8040933	1992	1584431	Emerging perspectives in Parkinson's disease.	1584431	Neurotoxicity Syndromes	D020267	MPTP Poisoning	DTXSID8040933
1-Methyl-4-phenyl-1,2,3,6-tetrahydropyridine	MPTP Poisoning	D015632	1-Methyl-4-phenyl-1,2,3,6-tetrahydropyridine	28289-54-5	DTXSID8040933	2004	15377875	MPTP as a mitochondrial neurotoxic model of Parkinson's disease.	15377875	Neurotoxicity Syndromes	D020267	MPTP Poisoning	DTXSID8040933
1-Methyl-4-phenyl-1,2,3,6-tetrahydropyridine	MPTP Poisoning	D015632	1-Methyl-4-phenyl-1,2,3,6-tetrahydropyridine	28289-54-5	DTXSID8040933	2004	15262334	The strong inhibition of triosephosphate isomerase by the natural beta-carbolines may explain their neurotoxic actions.	15262334	Neurotoxicity Syndromes	D020267	MPTP Poisoning	DTXSID8040933
1-Methyl-4-phenyl-1,2,3,6-tetrahydropyridine	MPTP Poisoning	D015632	1-Methyl-4-phenyl-1,2,3,6-tetrahydropyridine	28289-54-5	DTXSID8040933	2006	16336966	Role of ICAM-1 in persisting inflammation in Parkinson disease and MPTP monkeys.	16336966	Neurotoxicity Syndromes	D020267	MPTP Poisoning	DTXSID8040933
1-Methyl-4-phenyl-1,2,3,6-tetrahydropyridine	MPTP Poisoning	D015632	1-Methyl-4-phenyl-1,2,3,6-tetrahydropyridine	28289-54-5	DTXSID8040933	1992	1521037	Differential effects of acute and chronic nicotine treatment on MPTP-(1-methyl-4-phenyl-1,2,3,6-tetrahydropyridine) induced degeneration of nigrostriatal dopamine neurons in the black mouse.	1521037	Neurotoxicity Syndromes	D020267	MPTP Poisoning	DTXSID8040933
1-Methyl-4-phenyl-1,2,3,6-tetrahydropyridine	MPTP Poisoning	D015632	1-Methyl-4-phenyl-1,2,3,6-tetrahydropyridine	28289-54-5	DTXSID8040933	1991	1681090	Effect of D1 and D2 agonists and antagonists on dyskinesia produced by L-dopa in 1-methyl-4-phenyl-1,2,3,6-tetrahydropyridine-treated monkeys.	1681090	Neurotoxicity Syndromes	D020267	MPTP Poisoning	DTXSID8040933
1-Methyl-4-phenyl-1,2,3,6-tetrahydropyridine	MPTP Poisoning	D015632	1-Methyl-4-phenyl-1,2,3,6-tetrahydropyridine	28289-54-5	DTXSID8040933	2006	16920272	Dynamic modeling of alpha-synuclein aggregation for the sporadic and genetic forms of Parkinson's disease.	16920272	Neurotoxicity Syndromes	D020267	MPTP Poisoning	DTXSID8040933
1-Methyl-4-phenyl-1,2,3,6-tetrahydropyridine	MPTP Poisoning	D015632	1-Methyl-4-phenyl-1,2,3,6-tetrahydropyridine	28289-54-5	DTXSID8040933	1992	1637057	Mitochondrial mechanisms of neurotoxicity.	1637057	Neurotoxicity Syndromes	D020267	MPTP Poisoning	DTXSID8040933
1-Methyl-4-phenyl-1,2,3,6-tetrahydropyridine	MPTP Poisoning	D015632	1-Methyl-4-phenyl-1,2,3,6-tetrahydropyridine	28289-54-5	DTXSID8040933	2006	16424396	Enhanced de novo neurogenesis and dopaminergic neurogenesis in the substantia nigra of 1-methyl-4-phenyl-1,2,3,6-tetrahydropyridine-induced Parkinson's disease-like mice.	16424396	Neurotoxicity Syndromes	D020267	MPTP Poisoning	DTXSID8040933
1-Methyl-4-phenyl-1,2,3,6-tetrahydropyridine	MPTP Poisoning	D015632	1-Methyl-4-phenyl-1,2,3,6-tetrahydropyridine	28289-54-5	DTXSID8040933	2006	16437566	Docosahexaenoic acid reduces levodopa-induced dyskinesias in 1-methyl-4-phenyl-1,2,3,6-tetrahydropyridine monkeys.	16437566	Neurotoxicity Syndromes	D020267	MPTP Poisoning	DTXSID8040933
1-Methyl-4-phenyl-1,2,3,6-tetrahydropyridine	MPTP Poisoning	D015632	1-Methyl-4-phenyl-1,2,3,6-tetrahydropyridine	28289-54-5	DTXSID8040933	2005	15490461	Multiple small doses of levodopa plus entacapone produce continuous dopaminergic stimulation and reduce dyskinesia induction in MPTP-treated drug-naive primates.	15490461	Neurotoxicity Syndromes	D020267	MPTP Poisoning	DTXSID8040933
1-Methyl-4-phenyl-1,2,3,6-tetrahydropyridine	MPTP Poisoning	D015632	1-Methyl-4-phenyl-1,2,3,6-tetrahydropyridine	28289-54-5	DTXSID8040933	1992	1623269	MPTP and other Parkinson-inducing agents.	1623269	Neurotoxicity Syndromes	D020267	MPTP Poisoning	DTXSID8040933
1-Methyl-4-phenyl-1,2,3,6-tetrahydropyridine	MPTP Poisoning	D015632	1-Methyl-4-phenyl-1,2,3,6-tetrahydropyridine	28289-54-5	DTXSID8040933	1990	1978517	Chronic administration of MPTP to marmosets.	1978517	Neurotoxicity Syndromes	D020267	MPTP Poisoning	DTXSID8040933
1-Methyl-4-phenyl-1,2,3,6-tetrahydropyridine	MPTP Poisoning	D015632	1-Methyl-4-phenyl-1,2,3,6-tetrahydropyridine	28289-54-5	DTXSID8040933	2010	20197696	Social odor recognition: a novel behavioral model for cognitive dysfunction in Parkinson's disease.	20197696	Neurotoxicity Syndromes	D020267	MPTP Poisoning	DTXSID8040933
1-Methyl-4-phenyl-1,2,3,6-tetrahydropyridine	MPTP Poisoning	D015632	1-Methyl-4-phenyl-1,2,3,6-tetrahydropyridine	28289-54-5	DTXSID8040933	2009	19490092	WIN55,212-2, a cannabinoid receptor agonist, protects against nigrostriatal cell loss in the 1-methyl-4-phenyl-1,2,3,6-tetrahydropyridine mouse model of Parkinson's disease.	19490092	Neurotoxicity Syndromes	D020267	MPTP Poisoning	DTXSID8040933
1-Methyl-4-phenyl-1,2,3,6-tetrahydropyridine	MPTP Poisoning	D015632	1-Methyl-4-phenyl-1,2,3,6-tetrahydropyridine	28289-54-5	DTXSID8040933	2009	19817968	Inactivation of neuronal forebrain A receptors protects dopaminergic neurons in a mouse model of Parkinson's disease.	19817968	Neurotoxicity Syndromes	D020267	MPTP Poisoning	DTXSID8040933
1-Methyl-4-phenyl-1,2,3,6-tetrahydropyridine	MPTP Poisoning	D015632	1-Methyl-4-phenyl-1,2,3,6-tetrahydropyridine	28289-54-5	DTXSID8040933	2009	19245367	PPAR-gamma-mediated neuroprotection in a chronic mouse model of Parkinson's disease.	19245367	Neurotoxicity Syndromes	D020267	MPTP Poisoning	DTXSID8040933
1-Methyl-4-phenyl-1,2,3,6-tetrahydropyridine	MPTP Poisoning	D015632	1-Methyl-4-phenyl-1,2,3,6-tetrahydropyridine	28289-54-5	DTXSID8040933	2009	19551455	CXCR4 and CXCL12 expression is increased in the nigro-striatal system of Parkinson's disease.	19551455	Neurotoxicity Syndromes	D020267	MPTP Poisoning	DTXSID8040933
1-Methyl-4-phenyl-1,2,3,6-tetrahydropyridine	MPTP Poisoning	D015632	1-Methyl-4-phenyl-1,2,3,6-tetrahydropyridine	28289-54-5	DTXSID8040933	1991	2036621	MPTP-induced neurotoxicity and the quest for a preventative therapy for Parkinson's disease.	2036621	Neurotoxicity Syndromes	D020267	MPTP Poisoning	DTXSID8040933
1-Methyl-4-phenyl-1,2,3,6-tetrahydropyridine	MPTP Poisoning	D015632	1-Methyl-4-phenyl-1,2,3,6-tetrahydropyridine	28289-54-5	DTXSID8040933	1990	1976438	Modulatory role for CCK-B antagonists in Parkinson's disease.	1976438	Neurotoxicity Syndromes	D020267	MPTP Poisoning	DTXSID8040933
1-Methyl-4-phenyl-1,2,3,6-tetrahydropyridine	MPTP Poisoning	D015632	1-Methyl-4-phenyl-1,2,3,6-tetrahydropyridine	28289-54-5	DTXSID8040933	1991	2064731	Acetyl-levo-carnitine protects against MPTP-induced parkinsonism in primates.	2064731	Neurotoxicity Syndromes	D020267	MPTP Poisoning	DTXSID8040933
1-Methyl-4-phenyl-1,2,3,6-tetrahydropyridine	MPTP Poisoning	D015632	1-Methyl-4-phenyl-1,2,3,6-tetrahydropyridine	28289-54-5	DTXSID8040933	2009	19635479	Sleep disorders in Parkinson's disease: the contribution of the MPTP non-human primate model.	19635479	Neurotoxicity Syndromes	D020267	MPTP Poisoning	DTXSID8040933
1-Methyl-4-phenyl-1,2,3,6-tetrahydropyridine	MPTP Poisoning	D015632	1-Methyl-4-phenyl-1,2,3,6-tetrahydropyridine	28289-54-5	DTXSID8040933	2009	19070648	Neuroprotective effects of (+/-)-catechin against 1-methyl-4-phenyl-1,2,3,6-tetrahydropyridine (MPTP)-induced dopaminergic neurotoxicity in mice.	19070648	Neurotoxicity Syndromes	D020267	MPTP Poisoning	DTXSID8040933
1-Methyl-4-phenyl-1,2,3,6-tetrahydropyridine	MPTP Poisoning	D015632	1-Methyl-4-phenyl-1,2,3,6-tetrahydropyridine	28289-54-5	DTXSID8040933	2011	20980117	Assessment of metabolic changes in the striatum of a MPTP-intoxicated canine model: in vivo ¹H-MRS study of an animal model for Parkinson's disease.	20980117	Neurotoxicity Syndromes	D020267	MPTP Poisoning	DTXSID8040933
1-Methyl-4-phenyl-1,2,3,6-tetrahydropyridine	MPTP Poisoning	D015632	1-Methyl-4-phenyl-1,2,3,6-tetrahydropyridine	28289-54-5	DTXSID8040933	1991	2005976	Parkinson's disease. Fresh factors to consider.	2005976	Neurotoxicity Syndromes	D020267	MPTP Poisoning	DTXSID8040933
1-Methyl-4-phenyl-1,2,3,6-tetrahydropyridine	MPTP Poisoning	D015632	1-Methyl-4-phenyl-1,2,3,6-tetrahydropyridine	28289-54-5	DTXSID8040933	1990	2233418	Parkinson's disease and cytochrome P450: a possible link?	2233418	Neurotoxicity Syndromes	D020267	MPTP Poisoning	DTXSID8040933
1-Methyl-4-phenyl-1,2,3,6-tetrahydropyridine	MPTP Poisoning	D015632	1-Methyl-4-phenyl-1,2,3,6-tetrahydropyridine	28289-54-5	DTXSID8040933	2011	21725169	Effect of endurance exercise training on the expression of GFAP, S100B, and NSE in the striatum of chronic/progressive mouse model of Parkinson's disease.	21725169	Neurotoxicity Syndromes	D020267	MPTP Poisoning	DTXSID8040933
1-Methyl-4-phenyl-1,2,3,6-tetrahydropyridine	MPTP Poisoning	D015632	1-Methyl-4-phenyl-1,2,3,6-tetrahydropyridine	28289-54-5	DTXSID8040933	2011	21322017	Bioactivity of AAV2-neurturin gene therapy (CERE-120): differences between Parkinson's disease and nonhuman primate brains.	21322017	Neurotoxicity Syndromes	D020267	MPTP Poisoning	DTXSID8040933
1-Methyl-4-phenyl-1,2,3,6-tetrahydropyridine	MPTP Poisoning	D015632	1-Methyl-4-phenyl-1,2,3,6-tetrahydropyridine	28289-54-5	DTXSID8040933	1990	2199253	Biochemical aspects of drug-induced Parkinson's disease.	2199253	Neurotoxicity Syndromes	D020267	MPTP Poisoning	DTXSID8040933
1-Methyl-4-phenyl-1,2,3,6-tetrahydropyridine	MPTP Poisoning	D015632	1-Methyl-4-phenyl-1,2,3,6-tetrahydropyridine	28289-54-5	DTXSID8040933	2012	22546197	Mesenchymal stem cells augment neurogenesis in the subventricular zone and enhance differentiation of neural precursor cells into dopaminergic neurons in the substantia nigra of a parkinsonian model.	22546197	Neurotoxicity Syndromes	D020267	MPTP Poisoning	DTXSID8040933
1-Methyl-4-phenyl-1,2,3,6-tetrahydropyridine	MPTP Poisoning	D015632	1-Methyl-4-phenyl-1,2,3,6-tetrahydropyridine	28289-54-5	DTXSID8040933	1990	2253695	Effects of chronic treatment of MPTP monkeys with bromocriptine alone or in combination with SKF 38393.	2253695	Neurotoxicity Syndromes	D020267	MPTP Poisoning	DTXSID8040933
1-Methyl-4-phenyl-1,2,3,6-tetrahydropyridine	MPTP Poisoning	D015632	1-Methyl-4-phenyl-1,2,3,6-tetrahydropyridine	28289-54-5	DTXSID8040933	2011	21375482	The intranasal administration of 1-methyl-4-phenyl-1,2,3,6-tetrahydropyridine (MPTP): a new rodent model to test palliative and neuroprotective agents for Parkinson's disease.	21375482	Neurotoxicity Syndromes	D020267	MPTP Poisoning	DTXSID8040933
1-Methyl-4-phenyl-1,2,3,6-tetrahydropyridine	MPTP Poisoning	D015632	1-Methyl-4-phenyl-1,2,3,6-tetrahydropyridine	28289-54-5	DTXSID8040933	1990	2296259	Neural mechanisms of dystonia: evidence from a 2-deoxyglucose uptake study in a primate model of dopamine agonist-induced dystonia.	2296259	Neurotoxicity Syndromes	D020267	MPTP Poisoning	DTXSID8040933
1-Methyl-4-phenyl-1,2,3,6-tetrahydropyridine	MPTP Poisoning	D015632	1-Methyl-4-phenyl-1,2,3,6-tetrahydropyridine	28289-54-5	DTXSID8040933	2012	22639229	Comparison of the D2 receptor regulation and neurotoxicant susceptibility of nigrostriatal dopamine neurons in wild-type and CB1/CB2 receptor knockout mice.	22639229	Neurotoxicity Syndromes	D020267	MPTP Poisoning	DTXSID8040933
1-Methyl-4-phenyl-1,2,3,6-tetrahydropyridine	MPTP Poisoning	D015632	1-Methyl-4-phenyl-1,2,3,6-tetrahydropyridine	28289-54-5	DTXSID8040933	2013	21798732	Acute toxicity of MPTP and MPP(+) in the brain of embryo and newborn mice.	21798732	Neurotoxicity Syndromes	D020267	MPTP Poisoning	DTXSID8040933
1-Methyl-4-phenyl-1,2,3,6-tetrahydropyridine	MPTP Poisoning	D015632	1-Methyl-4-phenyl-1,2,3,6-tetrahydropyridine	28289-54-5	DTXSID8040933	2010	21254589	[Effects of subchronic hemantane administration on dopamine and serotonin receptors in intact and MPP+-treated rat brain ex vivo].	21254589	Neurotoxicity Syndromes	D020267	MPTP Poisoning	DTXSID8040933
1-Methyl-4-phenyl-1,2,3,6-tetrahydropyridine	MPTP Poisoning	D015632	1-Methyl-4-phenyl-1,2,3,6-tetrahydropyridine	28289-54-5	DTXSID8040933	2012	22166429	Animal models of Parkinson's disease.	22166429	Neurotoxicity Syndromes	D020267	MPTP Poisoning	DTXSID8040933
1-Methyl-4-phenyl-1,2,3,6-tetrahydropyridine	MPTP Poisoning	D015632	1-Methyl-4-phenyl-1,2,3,6-tetrahydropyridine	28289-54-5	DTXSID8040933	1990	2130940	Studies on 4-benzyl-1-methyl-1,2,3,6-tetrahydropyridine, a nonneurotoxic analogue of the parkinsonian inducing agent 1-methyl-4-phenyl-1,2,3,6-tetrahydropyridine.	2130940	Neurotoxicity Syndromes	D020267	MPTP Poisoning	DTXSID8040933
1-Methyl-4-phenyl-1,2,3,6-tetrahydropyridine	MPTP Poisoning	D015632	1-Methyl-4-phenyl-1,2,3,6-tetrahydropyridine	28289-54-5	DTXSID8040933	1990	2309157	1-methyl-4-phenyl-1,2,3,6-tetrahydropyridine-induced neurotoxicity in the rat: characterization and age-dependent effects.	2309157	Neurotoxicity Syndromes	D020267	MPTP Poisoning	DTXSID8040933
1-Methyl-4-phenyl-1,2,3,6-tetrahydropyridine	MPTP Poisoning	D015632	1-Methyl-4-phenyl-1,2,3,6-tetrahydropyridine	28289-54-5	DTXSID8040933	2011	21760537	Parkin-mediated protection of dopaminergic neurons in a chronic MPTP-minipump mouse model of Parkinson disease.	21760537	Neurotoxicity Syndromes	D020267	MPTP Poisoning	DTXSID8040933
1-Methyl-4-phenyl-1,2,3,6-tetrahydropyridine	MPTP Poisoning	D015632	1-Methyl-4-phenyl-1,2,3,6-tetrahydropyridine	28289-54-5	DTXSID8040933	1990	2204050	The neurotoxicity of MPTP and the relevance to Parkinson's disease.	2204050	Neurotoxicity Syndromes	D020267	MPTP Poisoning	DTXSID8040933
1-Methyl-4-phenyl-1,2,3,6-tetrahydropyridine	MPTP Poisoning	D015632	1-Methyl-4-phenyl-1,2,3,6-tetrahydropyridine	28289-54-5	DTXSID8040933	1990	2296255	Induction of chorea and dystonia in parkinsonian primates.	2296255	Neurotoxicity Syndromes	D020267	MPTP Poisoning	DTXSID8040933
1-Methyl-4-phenyl-1,2,3,6-tetrahydropyridine	MPTP Poisoning	D015632	1-Methyl-4-phenyl-1,2,3,6-tetrahydropyridine	28289-54-5	DTXSID8040933	2013	22669749	Therapeutic attenuation of neuroinflammation and apoptosis by black tea theaflavin in chronic MPTP/probenecid model of Parkinson's disease.	22669749	Neurotoxicity Syndromes	D020267	MPTP Poisoning	DTXSID8040933
1-Methyl-4-phenyl-1,2,3,6-tetrahydropyridine	MPTP Poisoning	D015632	1-Methyl-4-phenyl-1,2,3,6-tetrahydropyridine	28289-54-5	DTXSID8040933	2011	22040668	Impact of exercise on mitochondrial transcription factor expression and damage in the striatum of a chronic mouse model of Parkinson's disease.	22040668	Neurotoxicity Syndromes	D020267	MPTP Poisoning	DTXSID8040933
1-Methyl-4-phenyl-1,2,3,6-tetrahydropyridine	MPTP Poisoning	D015632	1-Methyl-4-phenyl-1,2,3,6-tetrahydropyridine	28289-54-5	DTXSID8040933	2012	22356806	Involvement of PPAR-γ in the neuroprotective and anti-inflammatory effects of angiotensin type 1 receptor inhibition: effects of the receptor antagonist telmisartan and receptor deletion in a mouse MPTP model of Parkinson's disease.	22356806	Neurotoxicity Syndromes	D020267	MPTP Poisoning	DTXSID8040933
1-Methyl-4-phenyl-1,2,3,6-tetrahydropyridine	MPTP Poisoning	D015632	1-Methyl-4-phenyl-1,2,3,6-tetrahydropyridine	28289-54-5	DTXSID8040933	2013	21788124	Neuronal or inducible nitric oxide synthase (NOS) expression level is not involved in the different susceptibility to nigro-striatal dopaminergic neurotoxicity induced by 1-methyl-4-phenyl-1,2,3,6-tetrahydropyridine (MPTP) between C57BL/6 and BALB/c mice.	21788124	Neurotoxicity Syndromes	D020267	MPTP Poisoning	DTXSID8040933
1-Methyl-4-phenyl-1,2,3,6-tetrahydropyridine	MPTP Poisoning	D015632	1-Methyl-4-phenyl-1,2,3,6-tetrahydropyridine	28289-54-5	DTXSID8040933	2011	21669281	Neuroprotection effects of retained acupuncture in neurotoxin-induced Parkinson's disease mice.	21669281	Neurotoxicity Syndromes	D020267	MPTP Poisoning	DTXSID8040933
1-Methyl-4-phenyl-1,2,3,6-tetrahydropyridine	MPTP Poisoning	D015632	1-Methyl-4-phenyl-1,2,3,6-tetrahydropyridine	28289-54-5	DTXSID8040933	2012	22964486	Brain-resident microglia predominate over infiltrating myeloid cells in activation, phagocytosis and interaction with T-lymphocytes in the MPTP mouse model of Parkinson disease.	22964486	Neurotoxicity Syndromes	D020267	MPTP Poisoning	DTXSID8040933
1-Methyl-4-phenyl-1,2,3,6-tetrahydropyridine	MPTP Poisoning	D015632	1-Methyl-4-phenyl-1,2,3,6-tetrahydropyridine	28289-54-5	DTXSID8040933	2011	21209200	Novel regulation of parkin function through c-Abl-mediated tyrosine phosphorylation: implications for Parkinson's disease.	21209200	Neurotoxicity Syndromes	D020267	MPTP Poisoning	DTXSID8040933
1-Methyl-4-phenyl-1,2,3,6-tetrahydropyridine	MPTP Poisoning	D015632	1-Methyl-4-phenyl-1,2,3,6-tetrahydropyridine	28289-54-5	DTXSID8040933	1990	2192787	Drug-induced parkinsonism and other movement disorders.	2192787	Neurotoxicity Syndromes	D020267	MPTP Poisoning	DTXSID8040933
1-Methyl-4-phenyl-1,2,3,6-tetrahydropyridine	MPTP Poisoning	D015632	1-Methyl-4-phenyl-1,2,3,6-tetrahydropyridine	28289-54-5	DTXSID8040933	1990	2123984	Animal models of parkinsonism.	2123984	Neurotoxicity Syndromes	D020267	MPTP Poisoning	DTXSID8040933
1-Methyl-4-phenyl-1,2,3,6-tetrahydropyridine	MPTP Poisoning	D015632	1-Methyl-4-phenyl-1,2,3,6-tetrahydropyridine	28289-54-5	DTXSID8040933	2013	21855308	Different susceptibility to 1-methyl-4-phenylpyridium (MPP(+))-induced nigro-striatal dopaminergic cell loss between C57BL/6 and BALB/c mice is not related to the difference of monoamine oxidase-B (MAO-B).	21855308	Neurotoxicity Syndromes	D020267	MPTP Poisoning	DTXSID8040933
1-Methyl-4-phenyl-1,2,3,6-tetrahydropyridine	MPTP Poisoning	D015632	1-Methyl-4-phenyl-1,2,3,6-tetrahydropyridine	28289-54-5	DTXSID8040933	2012	22155743	The MPTP neurotoxic lesion model of Parkinson's disease activates the apolipoprotein E cascade in the mouse brain.	22155743	Neurotoxicity Syndromes	D020267	MPTP Poisoning	DTXSID8040933
1-Methyl-4-phenyl-1,2,3,6-tetrahydropyridine	MPTP Poisoning	D015632	1-Methyl-4-phenyl-1,2,3,6-tetrahydropyridine	28289-54-5	DTXSID8040933	2011	21413090	The herbal preparation Padma® 28 protects against neurotoxicity in PC12 cells.	21413090	Neurotoxicity Syndromes	D020267	MPTP Poisoning	DTXSID8040933
1-Methyl-4-phenyl-1,2,3,6-tetrahydropyridine	MPTP Poisoning	D015632	1-Methyl-4-phenyl-1,2,3,6-tetrahydropyridine	28289-54-5	DTXSID8040933	2012	22708926	Aging of the dopaminergic system and motor behavior in mice intoxicated with the parkinsonian toxin 1-methyl-4-phenyl-1,2,3,6-tetrahydropyridine.	22708926	Neurotoxicity Syndromes	D020267	MPTP Poisoning	DTXSID8040933
1-Methyl-4-phenyl-1,2,3,6-tetrahydropyridine	MPTP Poisoning	D015632	1-Methyl-4-phenyl-1,2,3,6-tetrahydropyridine	28289-54-5	DTXSID8040933	2012	23139861	ROCK/Cdc42-mediated microglial motility and gliapse formation lead to phagocytosis of degenerating dopaminergic neurons in vivo.	23139861	Neurotoxicity Syndromes	D020267	MPTP Poisoning	DTXSID8040933
1-Methyl-4-phenyl-1,2,3,6-tetrahydropyridine	MPTP Poisoning	D015632	1-Methyl-4-phenyl-1,2,3,6-tetrahydropyridine	28289-54-5	DTXSID8040933	1999	10223460	Reversal of experimental parkinsonism by using selective chemical ablation of the medial globus pallidus.	10223460	Neurotoxicity Syndromes	D020267	MPTP Poisoning	DTXSID8040933
1-Methyl-4-phenyl-1,2,3,6-tetrahydropyridine	MPTP Poisoning	D015632	1-Methyl-4-phenyl-1,2,3,6-tetrahydropyridine	28289-54-5	DTXSID8040933	2000	10823583	MPTP decreases MT-I mRNA in mouse striatum.	10823583	Neurotoxicity Syndromes	D020267	MPTP Poisoning	DTXSID8040933
1-Methyl-4-phenyl-1,2,3,6-tetrahydropyridine	MPTP Poisoning	D015632	1-Methyl-4-phenyl-1,2,3,6-tetrahydropyridine	28289-54-5	DTXSID8040933	2000	10817604	Inhibition of neuronal nitric oxide synthase protects against MPTP toxicity.	10817604	Neurotoxicity Syndromes	D020267	MPTP Poisoning	DTXSID8040933
1-Methyl-4-phenyl-1,2,3,6-tetrahydropyridine	MPTP Poisoning	D015632	1-Methyl-4-phenyl-1,2,3,6-tetrahydropyridine	28289-54-5	DTXSID8040933	1999	10375668	Dopamine transporter loss and clinical changes in MPTP-lesioned primates.	10375668	Neurotoxicity Syndromes	D020267	MPTP Poisoning	DTXSID8040933
1-Methyl-4-phenyl-1,2,3,6-tetrahydropyridine	MPTP Poisoning	D015632	1-Methyl-4-phenyl-1,2,3,6-tetrahydropyridine	28289-54-5	DTXSID8040933	1999	10320728	Differential strain susceptibility following 1-methyl-4-phenyl-1,2,3,6-tetrahydropyridine (MPTP) administration acts in an autosomal dominant fashion: quantitative analysis in seven strains of Mus musculus.	10320728	Neurotoxicity Syndromes	D020267	MPTP Poisoning	DTXSID8040933
1-Methyl-4-phenyl-1,2,3,6-tetrahydropyridine	MPTP Poisoning	D015632	1-Methyl-4-phenyl-1,2,3,6-tetrahydropyridine	28289-54-5	DTXSID8040933	1999	10192785	Immunochemical analysis of vesicular monoamine transporter (VMAT2) protein in Parkinson's disease.	10192785	Neurotoxicity Syndromes	D020267	MPTP Poisoning	DTXSID8040933
1-Methyl-4-phenyl-1,2,3,6-tetrahydropyridine	MPTP Poisoning	D015632	1-Methyl-4-phenyl-1,2,3,6-tetrahydropyridine	28289-54-5	DTXSID8040933	2001	11208898	Group II metabotropic glutamate receptor activation protects striatal dopaminergic nerve terminals against MPP+-induced neurotoxicity along with brain-derived neurotrophic factor induction.	11208898	Neurotoxicity Syndromes	D020267	MPTP Poisoning	DTXSID8040933
1-Methyl-4-phenyl-1,2,3,6-tetrahydropyridine	MPTP Poisoning	D015632	1-Methyl-4-phenyl-1,2,3,6-tetrahydropyridine	28289-54-5	DTXSID8040933	1999	10398297	Dietary restriction and 2-deoxyglucose administration improve behavioral outcome and reduce degeneration of dopaminergic neurons in models of Parkinson's disease.	10398297	Neurotoxicity Syndromes	D020267	MPTP Poisoning	DTXSID8040933
1-Methyl-4-phenyl-1,2,3,6-tetrahydropyridine	MPTP Poisoning	D015632	1-Methyl-4-phenyl-1,2,3,6-tetrahydropyridine	28289-54-5	DTXSID8040933	1992	1362875	Molecular basis of discrepancies in neurotoxic properties among 1-methyl-4-aryl-1,2,3,6-tetrahydropyridines.	1362875	Neurotoxicity Syndromes	D020267	MPTP Poisoning	DTXSID8040933
1-Methyl-4-phenyl-1,2,3,6-tetrahydropyridine	MPTP Poisoning	D015632	1-Methyl-4-phenyl-1,2,3,6-tetrahydropyridine	28289-54-5	DTXSID8040933	2003	12900079	Effect of manganese exposure on MPTP neurotoxicities.	12900079	Neurotoxicity Syndromes	D020267	MPTP Poisoning	DTXSID8040933
1-Methyl-4-phenyl-1,2,3,6-tetrahydropyridine	MPTP Poisoning	D015632	1-Methyl-4-phenyl-1,2,3,6-tetrahydropyridine	28289-54-5	DTXSID8040933	2003	12846982	Apoptosis inducing factor and PARP-mediated injury in the MPTP mouse model of Parkinson's disease.	12846982	Neurotoxicity Syndromes	D020267	MPTP Poisoning	DTXSID8040933
1-Methyl-4-phenyl-1,2,3,6-tetrahydropyridine	MPTP Poisoning	D015632	1-Methyl-4-phenyl-1,2,3,6-tetrahydropyridine	28289-54-5	DTXSID8040933	2003	12846988	Pathophysiology of Parkinson's disease: the MPTP primate model of the human disorder.	12846988	Neurotoxicity Syndromes	D020267	MPTP Poisoning	DTXSID8040933
1-Methyl-4-phenyl-1,2,3,6-tetrahydropyridine	MPTP Poisoning	D015632	1-Methyl-4-phenyl-1,2,3,6-tetrahydropyridine	28289-54-5	DTXSID8040933	1992	1287728	Astrocytes and Parkinson's disease.	1287728	Neurotoxicity Syndromes	D020267	MPTP Poisoning	DTXSID8040933
1-Methyl-4-phenyl-1,2,3,6-tetrahydropyridine	MPTP Poisoning	D015632	1-Methyl-4-phenyl-1,2,3,6-tetrahydropyridine	28289-54-5	DTXSID8040933	2003	14656072	MPP+ induces the endoplasmic reticulum stress response in rabbit brain involving activation of the ATF-6 and NF-kappaB signaling pathways.	14656072	Neurotoxicity Syndromes	D020267	MPTP Poisoning	DTXSID8040933
1-Methyl-4-phenyl-1,2,3,6-tetrahydropyridine	MPTP Poisoning	D015632	1-Methyl-4-phenyl-1,2,3,6-tetrahydropyridine	28289-54-5	DTXSID8040933	1992	1461362	Mitochondrial factors involved in Parkinson's disease by MPTP toxicity in Macaca fascicularis and drug effect.	1461362	Neurotoxicity Syndromes	D020267	MPTP Poisoning	DTXSID8040933
1-Methyl-4-phenyl-1,2,3,6-tetrahydropyridine	MPTP Poisoning	D015632	1-Methyl-4-phenyl-1,2,3,6-tetrahydropyridine	28289-54-5	DTXSID8040933	1992	1354166	Effect of chronic treatment with (+)-PHNO, a D2 agonist in MPTP-treated monkeys.	1354166	Neurotoxicity Syndromes	D020267	MPTP Poisoning	DTXSID8040933
1-Methyl-4-phenyl-1,2,3,6-tetrahydropyridine	MPTP Poisoning	D015632	1-Methyl-4-phenyl-1,2,3,6-tetrahydropyridine	28289-54-5	DTXSID8040933	2003	12805479	Sympathetic innervation in the 1-methyl-4-phenyl-1,2,3,6-tetrahydropyridine primate model of Parkinson's disease.	12805479	Neurotoxicity Syndromes	D020267	MPTP Poisoning	DTXSID8040933
1-Methyl-4-phenyl-1,2,3,6-tetrahydropyridine	MPTP Poisoning	D015632	1-Methyl-4-phenyl-1,2,3,6-tetrahydropyridine	28289-54-5	DTXSID8040933	1992	1353337	Midbrain dopaminergic cell loss in Parkinson's disease and MPTP-induced parkinsonism: sparing of calbindin-D28k-containing cells.	1353337	Neurotoxicity Syndromes	D020267	MPTP Poisoning	DTXSID8040933
1-Methyl-4-phenyl-1,2,3,6-tetrahydropyridine	MPTP Poisoning	D015632	1-Methyl-4-phenyl-1,2,3,6-tetrahydropyridine	28289-54-5	DTXSID8040933	2003	12920198	L-DOPA treatment modulates nicotinic receptors in monkey striatum.	12920198	Neurotoxicity Syndromes	D020267	MPTP Poisoning	DTXSID8040933
1-Methyl-4-phenyl-1,2,3,6-tetrahydropyridine	MPTP Poisoning	D015632	1-Methyl-4-phenyl-1,2,3,6-tetrahydropyridine	28289-54-5	DTXSID8040933	1992	1353328	Neurotoxin-related research: from the laboratory to the clinic.	1353328	Neurotoxicity Syndromes	D020267	MPTP Poisoning	DTXSID8040933
1-Methyl-4-phenyl-1,2,3,6-tetrahydropyridine	MPTP Poisoning	D015632	1-Methyl-4-phenyl-1,2,3,6-tetrahydropyridine	28289-54-5	DTXSID8040933	2003	12642174	Effect of postnatal iron administration on MPTP-induced behavioral deficits and neurotoxicity: behavioral enhancement by L-Dopa-MK-801 co-administration.	12642174	Neurotoxicity Syndromes	D020267	MPTP Poisoning	DTXSID8040933
1-Methyl-4-phenyl-1,2,3,6-tetrahydropyridine	MPTP Poisoning	D015632	1-Methyl-4-phenyl-1,2,3,6-tetrahydropyridine	28289-54-5	DTXSID8040933	2004	14749427	Endogenous activation of mGlu5 metabotropic glutamate receptors contributes to the development of nigro-striatal damage induced by 1-methyl-4-phenyl-1,2,3,6-tetrahydropyridine in mice.	14749427	Neurotoxicity Syndromes	D020267	MPTP Poisoning	DTXSID8040933
1-Methyl-4-phenyl-1,2,3,6-tetrahydropyridine	MPTP Poisoning	D015632	1-Methyl-4-phenyl-1,2,3,6-tetrahydropyridine	28289-54-5	DTXSID8040933	2003	12871582	Alpha-1B adrenergic receptor knockout mice are protected against methamphetamine toxicity.	12871582	Neurotoxicity Syndromes	D020267	MPTP Poisoning	DTXSID8040933
1-Methyl-4-phenyl-1,2,3,6-tetrahydropyridine	MPTP Poisoning	D015632	1-Methyl-4-phenyl-1,2,3,6-tetrahydropyridine	28289-54-5	DTXSID8040933	2003	12871570	Attenuation of MPTP-induced dopaminergic neurotoxicity by TV3326, a cholinesterase-monoamine oxidase inhibitor.	12871570	Neurotoxicity Syndromes	D020267	MPTP Poisoning	DTXSID8040933
1-Methyl-4-phenyl-1,2,3,6-tetrahydropyridine	MPTP Poisoning	D015632	1-Methyl-4-phenyl-1,2,3,6-tetrahydropyridine	28289-54-5	DTXSID8040933	2003	12606067	Grid performance test to measure behavioral impairment in the MPTP-treated-mouse model of parkinsonism.	12606067	Neurotoxicity Syndromes	D020267	MPTP Poisoning	DTXSID8040933
1-Methyl-4-phenyl-1,2,3,6-tetrahydropyridine	Multiple System Atrophy	D015632	1-Methyl-4-phenyl-1,2,3,6-tetrahydropyridine	28289-54-5	DTXSID8040933	2011	21054946	Neuroprotective effect of human mesenchymal stem cells in an animal model of double toxin-induced multiple system atrophy parkinsonism.	21054946	Basal Ganglia Diseases	D019578	Multiple System Atrophy	DTXSID8040933
1-Methyl-4-phenyl-1,2,3,6-tetrahydropyridine	Muscle Rigidity	D015632	1-Methyl-4-phenyl-1,2,3,6-tetrahydropyridine	28289-54-5	DTXSID8040933	1991	1762681	Influence of N-methyl-4-phenyl-1,2,3,6-tetrahydropyridine-induced injury of dopaminergic nigrostriatal system on movement components of the instrumental reflex and motor thalamic neurons' reactions in the cat.	1762681	Neurologic Manifestations	D009127	Muscle Rigidity	DTXSID8040933
1-Methyl-4-phenyl-1,2,3,6-tetrahydropyridine	Nervous System Diseases	D015632	1-Methyl-4-phenyl-1,2,3,6-tetrahydropyridine	28289-54-5	DTXSID8040933	1994	8039547	1-Methyl-4-phenylpyridinium has greater neurotoxic effect after selenium deficiency than after vitamin E deficiency in rat striatum.	8039547	Nervous System Diseases	D009422	Nervous System Diseases	DTXSID8040933
1-Methyl-4-phenyl-1,2,3,6-tetrahydropyridine	Nervous System Diseases	D015632	1-Methyl-4-phenyl-1,2,3,6-tetrahydropyridine	28289-54-5	DTXSID8040933	1995	8534316	Relative resistance of rabbits to MPTP neurotoxicity.	8534316	Nervous System Diseases	D009422	Nervous System Diseases	DTXSID8040933
1-Methyl-4-phenyl-1,2,3,6-tetrahydropyridine	Nervous System Diseases	D015632	1-Methyl-4-phenyl-1,2,3,6-tetrahydropyridine	28289-54-5	DTXSID8040933	1994	8089930	A study of the biological pharmacology of IFO, a new selective and reversible monoamine oxidase-B inhibitor.	8089930	Nervous System Diseases	D009422	Nervous System Diseases	DTXSID8040933
1-Methyl-4-phenyl-1,2,3,6-tetrahydropyridine	Nervous System Diseases	D015632	1-Methyl-4-phenyl-1,2,3,6-tetrahydropyridine	28289-54-5	DTXSID8040933	1993	8102929	Selective MPP+ uptake into synaptic dopamine vesicles: possible involvement in MPTP neurotoxicity.	8102929	Nervous System Diseases	D009422	Nervous System Diseases	DTXSID8040933
1-Methyl-4-phenyl-1,2,3,6-tetrahydropyridine	Nervous System Diseases	D015632	1-Methyl-4-phenyl-1,2,3,6-tetrahydropyridine	28289-54-5	DTXSID8040933	1993	8487266	Design and synthesis of 18F-labeled neurotoxic analogs of MPTP.	8487266	Nervous System Diseases	D009422	Nervous System Diseases	DTXSID8040933
1-Methyl-4-phenyl-1,2,3,6-tetrahydropyridine	Nervous System Diseases	D015632	1-Methyl-4-phenyl-1,2,3,6-tetrahydropyridine	28289-54-5	DTXSID8040933	1996	8739629	Effects of testosterone upon MPTP-induced neurotoxicity of the nigrostriatal dopaminergic system of C57/B1 mice.	8739629	Nervous System Diseases	D009422	Nervous System Diseases	DTXSID8040933
1-Methyl-4-phenyl-1,2,3,6-tetrahydropyridine	Nervous System Diseases	D015632	1-Methyl-4-phenyl-1,2,3,6-tetrahydropyridine	28289-54-5	DTXSID8040933	1998	9663939	Neurotoxicity risk assessment of MPTP (N-methyl-4-phenyl-1,2,3,6-tetrahydropyridine) as a synthetic impurity of drugs.	9663939	Nervous System Diseases	D009422	Nervous System Diseases	DTXSID8040933
1-Methyl-4-phenyl-1,2,3,6-tetrahydropyridine	Nervous System Diseases	D015632	1-Methyl-4-phenyl-1,2,3,6-tetrahydropyridine	28289-54-5	DTXSID8040933	1985	3878976	Mechanisms of MPTP (1-methyl-4-phenyl-1,2,3,6-tetrahydropyridine) neurotoxicity to striatal dopamine neurons in mice.	3878976	Nervous System Diseases	D009422	Nervous System Diseases	DTXSID8040933
1-Methyl-4-phenyl-1,2,3,6-tetrahydropyridine	Nervous System Diseases	D015632	1-Methyl-4-phenyl-1,2,3,6-tetrahydropyridine	28289-54-5	DTXSID8040933	1985	3878793	Differential neurotoxicity of 1-methyl-4-phenyl-1,2,3,6-tetrahydropyridine (MPTP) in Swiss-Webster mice from different sources.	3878793	Nervous System Diseases	D009422	Nervous System Diseases	DTXSID8040933
1-Methyl-4-phenyl-1,2,3,6-tetrahydropyridine	Nervous System Diseases	D015632	1-Methyl-4-phenyl-1,2,3,6-tetrahydropyridine	28289-54-5	DTXSID8040933	1989	2616897	Maneb enhances MPTP neurotoxicity in mice.	2616897	Nervous System Diseases	D009422	Nervous System Diseases	DTXSID8040933
1-Methyl-4-phenyl-1,2,3,6-tetrahydropyridine	Nervous System Diseases	D015632	1-Methyl-4-phenyl-1,2,3,6-tetrahydropyridine	28289-54-5	DTXSID8040933	1989	2570859	A high dose of MPTP overcomes the protective effect of selegiline against dopaminergic neurotoxicity.	2570859	Nervous System Diseases	D009422	Nervous System Diseases	DTXSID8040933
1-Methyl-4-phenyl-1,2,3,6-tetrahydropyridine	Nervous System Diseases	D015632	1-Methyl-4-phenyl-1,2,3,6-tetrahydropyridine	28289-54-5	DTXSID8040933	1988	3068045	[The bases of MPTP neurotoxicity].	3068045	Nervous System Diseases	D009422	Nervous System Diseases	DTXSID8040933
1-Methyl-4-phenyl-1,2,3,6-tetrahydropyridine	Nervous System Diseases	D015632	1-Methyl-4-phenyl-1,2,3,6-tetrahydropyridine	28289-54-5	DTXSID8040933	1985	3002815	1-Methyl-4-phenyl-1,2,3,6-tetrahydropyridine (MPTP) neurotoxicity in mice is enhanced by pretreatment with diethyldithiocarbamate.	3002815	Nervous System Diseases	D009422	Nervous System Diseases	DTXSID8040933
1-Methyl-4-phenyl-1,2,3,6-tetrahydropyridine	Nervous System Diseases	D015632	1-Methyl-4-phenyl-1,2,3,6-tetrahydropyridine	28289-54-5	DTXSID8040933	1987	3492590	Evaluation of the biological activity of several analogs of the dopaminergic neurotoxin 1-methyl-4-phenyl-1,2,3,6-tetrahydropyridine.	3492590	Nervous System Diseases	D009422	Nervous System Diseases	DTXSID8040933
1-Methyl-4-phenyl-1,2,3,6-tetrahydropyridine	Nervous System Diseases	D015632	1-Methyl-4-phenyl-1,2,3,6-tetrahydropyridine	28289-54-5	DTXSID8040933	1986	3491762	Diphenylhydantoin and phenobarbital suppress the dopaminergic neurotoxicity of MPTP in mice.	3491762	Nervous System Diseases	D009422	Nervous System Diseases	DTXSID8040933
1-Methyl-4-phenyl-1,2,3,6-tetrahydropyridine	Nervous System Diseases	D015632	1-Methyl-4-phenyl-1,2,3,6-tetrahydropyridine	28289-54-5	DTXSID8040933	1990	2325834	Attenuation of 1-methyl-4-phenyl-1,2,3,6-tetrahydropyridine-induced neurotoxicity by tobacco smoke.	2325834	Nervous System Diseases	D009422	Nervous System Diseases	DTXSID8040933
1-Methyl-4-phenyl-1,2,3,6-tetrahydropyridine	Nervous System Diseases	D015632	1-Methyl-4-phenyl-1,2,3,6-tetrahydropyridine	28289-54-5	DTXSID8040933	1990	2323346	Behavioural effects and supersensitivity in the rat following intranigral MPTP and MPP+ administration.	2323346	Nervous System Diseases	D009422	Nervous System Diseases	DTXSID8040933
1-Methyl-4-phenyl-1,2,3,6-tetrahydropyridine	Nervous System Diseases	D015632	1-Methyl-4-phenyl-1,2,3,6-tetrahydropyridine	28289-54-5	DTXSID8040933	1989	2485822	The neurotoxicity of MPTP and its relationship to the pathophysiology of Parkinson's disease.	2485822	Nervous System Diseases	D009422	Nervous System Diseases	DTXSID8040933
1-Methyl-4-phenyl-1,2,3,6-tetrahydropyridine	Nervous System Diseases	D015632	1-Methyl-4-phenyl-1,2,3,6-tetrahydropyridine	28289-54-5	DTXSID8040933	2004	15178694	SL25.1131 [3(S),3a(S)-3-methoxymethyl-7-[4,4,4-trifluorobutoxy]-3,3a,4,5-tetrahydro-1,3-oxazolo[3,4-a]quinolin-1-one], a new, reversible, and mixed inhibitor of monoamine oxidase-A and monoamine oxidase-B: biochemical and behavioral profile.	15178694	Nervous System Diseases	D009422	Nervous System Diseases	DTXSID8040933
1-Methyl-4-phenyl-1,2,3,6-tetrahydropyridine	Nervous System Diseases	D015632	1-Methyl-4-phenyl-1,2,3,6-tetrahydropyridine	28289-54-5	DTXSID8040933	1991	1933326	Correlation of MPTP neurotoxicity in vivo with oxidation of MPTP by the brain and blood-brain barrier in vitro in five rat strains.	1933326	Nervous System Diseases	D009422	Nervous System Diseases	DTXSID8040933
1-Methyl-4-phenyl-1,2,3,6-tetrahydropyridine	Nervous System Diseases	D015632	1-Methyl-4-phenyl-1,2,3,6-tetrahydropyridine	28289-54-5	DTXSID8040933	1990	1974854	Differential recovery of dopamine synthetic enzymes following MPTP and the consequences of GM1 ganglioside treatment.	1974854	Nervous System Diseases	D009422	Nervous System Diseases	DTXSID8040933
1-Methyl-4-phenyl-1,2,3,6-tetrahydropyridine	Nervous System Diseases	D015632	1-Methyl-4-phenyl-1,2,3,6-tetrahydropyridine	28289-54-5	DTXSID8040933	1990	2117541	1-Methyl-4-(2'-methylphenyl)-1,2,3,6-tetrahydropyridine (2'-methyl-MPTP) is less neurotoxic than MPTP in the common marmoset.	2117541	Nervous System Diseases	D009422	Nervous System Diseases	DTXSID8040933
1-Methyl-4-phenyl-1,2,3,6-tetrahydropyridine	Nervous System Diseases	D015632	1-Methyl-4-phenyl-1,2,3,6-tetrahydropyridine	28289-54-5	DTXSID8040933	1999	10389142	Enzyme-catalyzed bioactivation of cyclic tertiary amines to form potential neurotoxins.	10389142	Nervous System Diseases	D009422	Nervous System Diseases	DTXSID8040933
1-Methyl-4-phenyl-1,2,3,6-tetrahydropyridine	Nervous System Diseases	D015632	1-Methyl-4-phenyl-1,2,3,6-tetrahydropyridine	28289-54-5	DTXSID8040933	1992	1364057	Comparative studies of the neurotoxicity of MPTP in rats of different ages.	1364057	Nervous System Diseases	D009422	Nervous System Diseases	DTXSID8040933
1-Methyl-4-phenyl-1,2,3,6-tetrahydropyridine	Neurodegenerative Diseases	D015632	1-Methyl-4-phenyl-1,2,3,6-tetrahydropyridine	28289-54-5	DTXSID8040933	2017	28363982	Deficiency in Neuronal TGF-β Signaling Leads to Nigrostriatal Degeneration and Activation of TGF-β Signaling Protects against MPTP Neurotoxicity in Mice.	28363982	Neurodegenerative Diseases	D019636	Neurodegenerative Diseases	DTXSID8040933
1-Methyl-4-phenyl-1,2,3,6-tetrahydropyridine	Neurodegenerative Diseases	D015632	1-Methyl-4-phenyl-1,2,3,6-tetrahydropyridine	28289-54-5	DTXSID8040933	2017	28442167	Tipping Points and Endogenous Determinants of Nigrostriatal Degeneration by MPTP.	28442167	Neurodegenerative Diseases	D019636	Neurodegenerative Diseases	DTXSID8040933
1-Methyl-4-phenyl-1,2,3,6-tetrahydropyridine	Neurodegenerative Diseases	D015632	1-Methyl-4-phenyl-1,2,3,6-tetrahydropyridine	28289-54-5	DTXSID8040933	2008	17985252	Neurodegenerative diseases: neurotoxins as sufficient etiologic agents?	17985252	Neurodegenerative Diseases	D019636	Neurodegenerative Diseases	DTXSID8040933
1-Methyl-4-phenyl-1,2,3,6-tetrahydropyridine	Neurodegenerative Diseases	D015632	1-Methyl-4-phenyl-1,2,3,6-tetrahydropyridine	28289-54-5	DTXSID8040933	2007	17127354	Mitochondrial toxins and neurodegenerative diseases.	17127354	Neurodegenerative Diseases	D019636	Neurodegenerative Diseases	DTXSID8040933
1-Methyl-4-phenyl-1,2,3,6-tetrahydropyridine	Neuromuscular Diseases	D015632	1-Methyl-4-phenyl-1,2,3,6-tetrahydropyridine	28289-54-5	DTXSID8040933	2013	24103762	Geraniol attenuates α-synuclein expression and neuromuscular impairment through increase dopamine content in MPTP intoxicated mice by dose dependent manner.	24103762	Neuromuscular Diseases	D009468	Neuromuscular Diseases	DTXSID8040933
1-Methyl-4-phenyl-1,2,3,6-tetrahydropyridine	Olfaction Disorders	D015632	1-Methyl-4-phenyl-1,2,3,6-tetrahydropyridine	28289-54-5	DTXSID8040933	2004	15277042	Olfactory impairment and Parkinson's disease-like symptoms observed in the common marmoset following administration of 1-methyl-4-phenyl-1,2,3,6-tetrahydropyridine.	15277042	Neurologic Manifestations	D000857	Olfaction Disorders	DTXSID8040933
1-Methyl-4-phenyl-1,2,3,6-tetrahydropyridine	Parkinson Disease, Secondary	D015632	1-Methyl-4-phenyl-1,2,3,6-tetrahydropyridine	28289-54-5	DTXSID8040933	1984	6610772	Leads from the MMWR. Street-drug contaminant causing parkinsonism.	6610772	Basal Ganglia Diseases	D010302	Parkinson Disease, Secondary	DTXSID8040933
1-Methyl-4-phenyl-1,2,3,6-tetrahydropyridine	Parkinson Disease, Secondary	D015632	1-Methyl-4-phenyl-1,2,3,6-tetrahydropyridine	28289-54-5	DTXSID8040933	1984	6608980	The neurotoxicity of 1-methyl-4-phenyl-1,2,3,6-tetrahydropyridine in the monkey and man.	6608980	Basal Ganglia Diseases	D010302	Parkinson Disease, Secondary	DTXSID8040933
1-Methyl-4-phenyl-1,2,3,6-tetrahydropyridine	Parkinson Disease, Secondary	D015632	1-Methyl-4-phenyl-1,2,3,6-tetrahydropyridine	28289-54-5	DTXSID8040933	1984	6608943	Inhibition of dopamine uptake by N-methyl-4-phenyl-1,2,3,6-tetrahydropyridine, a cause of parkinsonism.	6608943	Basal Ganglia Diseases	D010302	Parkinson Disease, Secondary	DTXSID8040933
1-Methyl-4-phenyl-1,2,3,6-tetrahydropyridine	Parkinson Disease, Secondary	D015632	1-Methyl-4-phenyl-1,2,3,6-tetrahydropyridine	28289-54-5	DTXSID8040933	1984	6335692	Uptake of MPP(+) by dopamine neurons explains selectivity of parkinsonism-inducing neurotoxin, MPTP.	6335692	Basal Ganglia Diseases	D010302	Parkinson Disease, Secondary	DTXSID8040933
1-Methyl-4-phenyl-1,2,3,6-tetrahydropyridine	Parkinson Disease, Secondary	D015632	1-Methyl-4-phenyl-1,2,3,6-tetrahydropyridine	28289-54-5	DTXSID8040933	1983	6602228	Street drugs yield primate Parkinson's model.	6602228	Basal Ganglia Diseases	D010302	Parkinson Disease, Secondary	DTXSID8040933
1-Methyl-4-phenyl-1,2,3,6-tetrahydropyridine	Parkinson Disease, Secondary	D015632	1-Methyl-4-phenyl-1,2,3,6-tetrahydropyridine	28289-54-5	DTXSID8040933	1984	6332378	Pargyline prevents MPTP-induced parkinsonism in primates.	6332378	Basal Ganglia Diseases	D010302	Parkinson Disease, Secondary	DTXSID8040933
1-Methyl-4-phenyl-1,2,3,6-tetrahydropyridine	Parkinson Disease, Secondary	D015632	1-Methyl-4-phenyl-1,2,3,6-tetrahydropyridine	28289-54-5	DTXSID8040933	1984	6332988	Intraneuronal generation of a pyridinium metabolite may cause drug-induced parkinsonism.	6332988	Basal Ganglia Diseases	D010302	Parkinson Disease, Secondary	DTXSID8040933
1-Methyl-4-phenyl-1,2,3,6-tetrahydropyridine	Parkinson Disease, Secondary	D015632	1-Methyl-4-phenyl-1,2,3,6-tetrahydropyridine	28289-54-5	DTXSID8040933	1984	6606784	Chronic parkinsonism secondary to intranasal administration of a product of meperidine-analogue synthesis.	6606784	Basal Ganglia Diseases	D010302	Parkinson Disease, Secondary	DTXSID8040933
1-Methyl-4-phenyl-1,2,3,6-tetrahydropyridine	Parkinson Disease, Secondary	D015632	1-Methyl-4-phenyl-1,2,3,6-tetrahydropyridine	28289-54-5	DTXSID8040933	1984	6332333	Neurochemical and behavioral effects of 1-methyl-4-phenyl-1,2,3,6- tetrahydropyridine (MPTP) in rat, guinea pig, and monkey.	6332333	Basal Ganglia Diseases	D010302	Parkinson Disease, Secondary	DTXSID8040933
1-Methyl-4-phenyl-1,2,3,6-tetrahydropyridine	Parkinson Disease, Secondary	D015632	1-Methyl-4-phenyl-1,2,3,6-tetrahydropyridine	28289-54-5	DTXSID8040933	1984	6333134	MPTP-induced parkinsonism in human and non-human primates--clinical and experimental aspects.	6333134	Basal Ganglia Diseases	D010302	Parkinson Disease, Secondary	DTXSID8040933
1-Methyl-4-phenyl-1,2,3,6-tetrahydropyridine	Parkinson Disease, Secondary	D015632	1-Methyl-4-phenyl-1,2,3,6-tetrahydropyridine	28289-54-5	DTXSID8040933	1983	6602944	Parkinson's disease in a chemist working with 1-methyl-4-phenyl-1,2,5,6-tetrahydropyridine.	6602944	Basal Ganglia Diseases	D010302	Parkinson Disease, Secondary	DTXSID8040933
1-Methyl-4-phenyl-1,2,3,6-tetrahydropyridine	Parkinson Disease, Secondary	D015632	1-Methyl-4-phenyl-1,2,3,6-tetrahydropyridine	28289-54-5	DTXSID8040933	1983	6403987	Monkey model of Parkinson's disease.	6403987	Basal Ganglia Diseases	D010302	Parkinson Disease, Secondary	DTXSID8040933
1-Methyl-4-phenyl-1,2,3,6-tetrahydropyridine	Parkinson Disease, Secondary	D015632	1-Methyl-4-phenyl-1,2,3,6-tetrahydropyridine	28289-54-5	DTXSID8040933	1984	6433484	Brain enzyme is the target of drug toxin.	6433484	Basal Ganglia Diseases	D010302	Parkinson Disease, Secondary	DTXSID8040933
1-Methyl-4-phenyl-1,2,3,6-tetrahydropyridine	Parkinson Disease, Secondary	D015632	1-Methyl-4-phenyl-1,2,3,6-tetrahydropyridine	28289-54-5	DTXSID8040933	1984	6442232	Pargyline and deprenyl prevent the neurotoxicity of 1-methyl-4-phenyl-1,2,3,6-tetrahydropyridine (MPTP) in monkeys.	6442232	Basal Ganglia Diseases	D010302	Parkinson Disease, Secondary	DTXSID8040933
1-Methyl-4-phenyl-1,2,3,6-tetrahydropyridine	Parkinson Disease, Secondary	D015632	1-Methyl-4-phenyl-1,2,3,6-tetrahydropyridine	28289-54-5	DTXSID8040933	1984	6427583	Street-drug contaminant causing parkinsonism.	6427583	Basal Ganglia Diseases	D010302	Parkinson Disease, Secondary	DTXSID8040933
1-Methyl-4-phenyl-1,2,3,6-tetrahydropyridine	Parkinson Disease, Secondary	D015632	1-Methyl-4-phenyl-1,2,3,6-tetrahydropyridine	28289-54-5	DTXSID8040933	1984	6437573	MPTP parkinsonism.	6437573	Basal Ganglia Diseases	D010302	Parkinson Disease, Secondary	DTXSID8040933
1-Methyl-4-phenyl-1,2,3,6-tetrahydropyridine	Parkinson Disease, Secondary	D015632	1-Methyl-4-phenyl-1,2,3,6-tetrahydropyridine	28289-54-5	DTXSID8040933	1993	8105418	Chronic administration of 1-methyl-4-phenyl-1,2,3,6-tetrahydropyridine to monkeys: behavioural, morphological and biochemical correlates.	8105418	Basal Ganglia Diseases	D010302	Parkinson Disease, Secondary	DTXSID8040933
1-Methyl-4-phenyl-1,2,3,6-tetrahydropyridine	Parkinson Disease, Secondary	D015632	1-Methyl-4-phenyl-1,2,3,6-tetrahydropyridine	28289-54-5	DTXSID8040933	1993	8243537	L-deprenyl confers specific protection against MPTP-induced Parkinson's disease-like movement disorder in the goldfish.	8243537	Basal Ganglia Diseases	D010302	Parkinson Disease, Secondary	DTXSID8040933
1-Methyl-4-phenyl-1,2,3,6-tetrahydropyridine	Parkinson Disease, Secondary	D015632	1-Methyl-4-phenyl-1,2,3,6-tetrahydropyridine	28289-54-5	DTXSID8040933	1994	8179773	Long-term MPTP-treated monkeys are resistant to GM1 systemic therapy.	8179773	Basal Ganglia Diseases	D010302	Parkinson Disease, Secondary	DTXSID8040933
1-Methyl-4-phenyl-1,2,3,6-tetrahydropyridine	Parkinson Disease, Secondary	D015632	1-Methyl-4-phenyl-1,2,3,6-tetrahydropyridine	28289-54-5	DTXSID8040933	1994	8177363	Parkinson-like disease by 1-methyl-4-phenyl-1,2,3,6-tetrahydropyridine (MPTP) toxicity in Macaca fascicularis: synaptosomal metabolism and action of dihydroergocriptine.	8177363	Basal Ganglia Diseases	D010302	Parkinson Disease, Secondary	DTXSID8040933
1-Methyl-4-phenyl-1,2,3,6-tetrahydropyridine	Parkinson Disease, Secondary	D015632	1-Methyl-4-phenyl-1,2,3,6-tetrahydropyridine	28289-54-5	DTXSID8040933	1995	7670030	[A new model of depressive syndrome in rats caused by administering 1-methyl-4-phenyl-1,2,3,6-tetrahydropyridine (MPTP)].	7670030	Basal Ganglia Diseases	D010302	Parkinson Disease, Secondary	DTXSID8040933
1-Methyl-4-phenyl-1,2,3,6-tetrahydropyridine	Parkinson Disease, Secondary	D015632	1-Methyl-4-phenyl-1,2,3,6-tetrahydropyridine	28289-54-5	DTXSID8040933	1995	7672436	Might environmental factors contribute to neurodegenerative diseases?	7672436	Basal Ganglia Diseases	D010302	Parkinson Disease, Secondary	DTXSID8040933
1-Methyl-4-phenyl-1,2,3,6-tetrahydropyridine	Parkinson Disease, Secondary	D015632	1-Methyl-4-phenyl-1,2,3,6-tetrahydropyridine	28289-54-5	DTXSID8040933	1994	8210225	MRI detects acute degeneration of the nigrostriatal dopamine system after MPTP exposure in hemiparkinsonian monkeys.	8210225	Basal Ganglia Diseases	D010302	Parkinson Disease, Secondary	DTXSID8040933
1-Methyl-4-phenyl-1,2,3,6-tetrahydropyridine	Parkinson Disease, Secondary	D015632	1-Methyl-4-phenyl-1,2,3,6-tetrahydropyridine	28289-54-5	DTXSID8040933	1996	8714707	Chronic alterations in dopaminergic neurotransmission produce a persistent elevation of deltaFosB-like protein(s) in both the rodent and primate striatum.	8714707	Basal Ganglia Diseases	D010302	Parkinson Disease, Secondary	DTXSID8040933
1-Methyl-4-phenyl-1,2,3,6-tetrahydropyridine	Parkinson Disease, Secondary	D015632	1-Methyl-4-phenyl-1,2,3,6-tetrahydropyridine	28289-54-5	DTXSID8040933	1994	8197222	[MPTP--neurotoxin and model substance in Parkinson research].	8197222	Basal Ganglia Diseases	D010302	Parkinson Disease, Secondary	DTXSID8040933
1-Methyl-4-phenyl-1,2,3,6-tetrahydropyridine	Parkinson Disease, Secondary	D015632	1-Methyl-4-phenyl-1,2,3,6-tetrahydropyridine	28289-54-5	DTXSID8040933	1993	8469305	Stable parkinsonian syndrome and uneven loss of striatal dopamine fibres following chronic MPTP administration in baboons.	8469305	Basal Ganglia Diseases	D010302	Parkinson Disease, Secondary	DTXSID8040933
1-Methyl-4-phenyl-1,2,3,6-tetrahydropyridine	Parkinson Disease, Secondary	D015632	1-Methyl-4-phenyl-1,2,3,6-tetrahydropyridine	28289-54-5	DTXSID8040933	1991	7580173	The effects of electroconvulsive shock on dopamine-1 and dopamine-2 receptor ligand binding activity in MPTP-treated mice.	7580173	Basal Ganglia Diseases	D010302	Parkinson Disease, Secondary	DTXSID8040933
1-Methyl-4-phenyl-1,2,3,6-tetrahydropyridine	Parkinson Disease, Secondary	D015632	1-Methyl-4-phenyl-1,2,3,6-tetrahydropyridine	28289-54-5	DTXSID8040933	1994	8263513	Increased iron in the substantia nigra compacta of the MPTP-lesioned hemiparkinsonian African green monkey: evidence from proton microprobe elemental microanalysis.	8263513	Basal Ganglia Diseases	D010302	Parkinson Disease, Secondary	DTXSID8040933
1-Methyl-4-phenyl-1,2,3,6-tetrahydropyridine	Parkinson Disease, Secondary	D015632	1-Methyl-4-phenyl-1,2,3,6-tetrahydropyridine	28289-54-5	DTXSID8040933	1994	8263548	Modulatory effects of testosterone on 1-methyl-4-phenyl-1,2,3,6-tetrahydropyridine-induced neurotoxicity.	8263548	Basal Ganglia Diseases	D010302	Parkinson Disease, Secondary	DTXSID8040933
1-Methyl-4-phenyl-1,2,3,6-tetrahydropyridine	Parkinson Disease, Secondary	D015632	1-Methyl-4-phenyl-1,2,3,6-tetrahydropyridine	28289-54-5	DTXSID8040933	1993	8512193	The goldfish as a drug discovery vehicle for Parkinson's disease and other neurodegenerative disorders.	8512193	Basal Ganglia Diseases	D010302	Parkinson Disease, Secondary	DTXSID8040933
1-Methyl-4-phenyl-1,2,3,6-tetrahydropyridine	Parkinson Disease, Secondary	D015632	1-Methyl-4-phenyl-1,2,3,6-tetrahydropyridine	28289-54-5	DTXSID8040933	1996	8684621	Metabolic activity of the basal ganglia in parkinsonian syndromes in human and non-human primates: a cytochrome oxidase histochemistry study.	8684621	Basal Ganglia Diseases	D010302	Parkinson Disease, Secondary	DTXSID8040933
1-Methyl-4-phenyl-1,2,3,6-tetrahydropyridine	Parkinson Disease, Secondary	D015632	1-Methyl-4-phenyl-1,2,3,6-tetrahydropyridine	28289-54-5	DTXSID8040933	1993	8247275	Does neuromelanin contribute to the vulnerability of catecholaminergic neurons in monkeys intoxicated with MPTP?	8247275	Basal Ganglia Diseases	D010302	Parkinson Disease, Secondary	DTXSID8040933
1-Methyl-4-phenyl-1,2,3,6-tetrahydropyridine	Parkinson Disease, Secondary	D015632	1-Methyl-4-phenyl-1,2,3,6-tetrahydropyridine	28289-54-5	DTXSID8040933	1993	7688878	Thalamotomy for the alleviation of levodopa-induced dyskinesia: experimental studies in the 1-methyl-4-phenyl-1,2,3,6-tetrahydropyridine-treated parkinsonian monkey.	7688878	Basal Ganglia Diseases	D010302	Parkinson Disease, Secondary	DTXSID8040933
1-Methyl-4-phenyl-1,2,3,6-tetrahydropyridine	Parkinson Disease, Secondary	D015632	1-Methyl-4-phenyl-1,2,3,6-tetrahydropyridine	28289-54-5	DTXSID8040933	1994	8028787	Iron accumulation in the substantia nigra of 1-methyl-4-phenyl-1,2,3,6-tetrahydropyridine (MPTP)-induced hemiparkinsonian monkeys.	8028787	Basal Ganglia Diseases	D010302	Parkinson Disease, Secondary	DTXSID8040933
1-Methyl-4-phenyl-1,2,3,6-tetrahydropyridine	Parkinson Disease, Secondary	D015632	1-Methyl-4-phenyl-1,2,3,6-tetrahydropyridine	28289-54-5	DTXSID8040933	1994	8028778	Alteration of pallidal cholinergic activity in MPTP-treated monkeys: effect of dihydro-alpha-ergocryptine (DEK).	8028778	Basal Ganglia Diseases	D010302	Parkinson Disease, Secondary	DTXSID8040933
1-Methyl-4-phenyl-1,2,3,6-tetrahydropyridine	Parkinson Disease, Secondary	D015632	1-Methyl-4-phenyl-1,2,3,6-tetrahydropyridine	28289-54-5	DTXSID8040933	1994	7838312	Potential parkinsonian protoxicants within and without.	7838312	Basal Ganglia Diseases	D010302	Parkinson Disease, Secondary	DTXSID8040933
1-Methyl-4-phenyl-1,2,3,6-tetrahydropyridine	Parkinson Disease, Secondary	D015632	1-Methyl-4-phenyl-1,2,3,6-tetrahydropyridine	28289-54-5	DTXSID8040933	1994	7970192	MPTP-induced parkinsonism in primates: pattern of striatal dopamine loss following acute and chronic administration.	7970192	Basal Ganglia Diseases	D010302	Parkinson Disease, Secondary	DTXSID8040933
1-Methyl-4-phenyl-1,2,3,6-tetrahydropyridine	Parkinson Disease, Secondary	D015632	1-Methyl-4-phenyl-1,2,3,6-tetrahydropyridine	28289-54-5	DTXSID8040933	1993	8380528	Similarities and differences between MPTP-induced parkinsonsim and Parkinson's disease. Neuropathologic considerations.	8380528	Basal Ganglia Diseases	D010302	Parkinson Disease, Secondary	DTXSID8040933
1-Methyl-4-phenyl-1,2,3,6-tetrahydropyridine	Parkinson Disease, Secondary	D015632	1-Methyl-4-phenyl-1,2,3,6-tetrahydropyridine	28289-54-5	DTXSID8040933	1994	7851473	Antiparkinsonian activity of talipexole in MPTP-treated monkeys: in combination with L-dopa and as chronic treatment.	7851473	Basal Ganglia Diseases	D010302	Parkinson Disease, Secondary	DTXSID8040933
1-Methyl-4-phenyl-1,2,3,6-tetrahydropyridine	Parkinson Disease, Secondary	D015632	1-Methyl-4-phenyl-1,2,3,6-tetrahydropyridine	28289-54-5	DTXSID8040933	1993	8380523	Biochemical mechanisms underlying MPTP-induced and idiopathic parkinsonism. New vistas.	8380523	Basal Ganglia Diseases	D010302	Parkinson Disease, Secondary	DTXSID8040933
1-Methyl-4-phenyl-1,2,3,6-tetrahydropyridine	Parkinson Disease, Secondary	D015632	1-Methyl-4-phenyl-1,2,3,6-tetrahydropyridine	28289-54-5	DTXSID8040933	1995	8544992	Effects of L-DOPA on preproenkephalin and preprotachykinin gene expression in the MPTP-treated monkey striatum.	8544992	Basal Ganglia Diseases	D010302	Parkinson Disease, Secondary	DTXSID8040933
1-Methyl-4-phenyl-1,2,3,6-tetrahydropyridine	Parkinson Disease, Secondary	D015632	1-Methyl-4-phenyl-1,2,3,6-tetrahydropyridine	28289-54-5	DTXSID8040933	1994	7979223	Positron emission tomographic evidence for progression of human MPTP-induced dopaminergic lesions.	7979223	Basal Ganglia Diseases	D010302	Parkinson Disease, Secondary	DTXSID8040933
1-Methyl-4-phenyl-1,2,3,6-tetrahydropyridine	Parkinson Disease, Secondary	D015632	1-Methyl-4-phenyl-1,2,3,6-tetrahydropyridine	28289-54-5	DTXSID8040933	1996	8615126	Excitatory amino acids and MPTP toxicity.	8615126	Basal Ganglia Diseases	D010302	Parkinson Disease, Secondary	DTXSID8040933
1-Methyl-4-phenyl-1,2,3,6-tetrahydropyridine	Parkinson Disease, Secondary	D015632	1-Methyl-4-phenyl-1,2,3,6-tetrahydropyridine	28289-54-5	DTXSID8040933	1993	8420136	MPTP and aging. Studies in the C57BL/6 mouse.	8420136	Basal Ganglia Diseases	D010302	Parkinson Disease, Secondary	DTXSID8040933
1-Methyl-4-phenyl-1,2,3,6-tetrahydropyridine	Parkinson Disease, Secondary	D015632	1-Methyl-4-phenyl-1,2,3,6-tetrahydropyridine	28289-54-5	DTXSID8040933	1993	8420218	Fifteen months' follow-up on bilateral embryonic mesencephalic grafts in two cases of severe MPTP-induced parkinsonism.	8420218	Basal Ganglia Diseases	D010302	Parkinson Disease, Secondary	DTXSID8040933
1-Methyl-4-phenyl-1,2,3,6-tetrahydropyridine	Parkinson Disease, Secondary	D015632	1-Methyl-4-phenyl-1,2,3,6-tetrahydropyridine	28289-54-5	DTXSID8040933	1996	8618687	Consequences of nigrostriatal denervation on the gamma-aminobutyric acidic neurons of substantia nigra pars reticulata and superior colliculus in parkinsonian syndromes.	8618687	Basal Ganglia Diseases	D010302	Parkinson Disease, Secondary	DTXSID8040933
1-Methyl-4-phenyl-1,2,3,6-tetrahydropyridine	Parkinson Disease, Secondary	D015632	1-Methyl-4-phenyl-1,2,3,6-tetrahydropyridine	28289-54-5	DTXSID8040933	1993	8093421	Movement disorders: therapeutic role of vitamin E.	8093421	Basal Ganglia Diseases	D010302	Parkinson Disease, Secondary	DTXSID8040933
1-Methyl-4-phenyl-1,2,3,6-tetrahydropyridine	Parkinson Disease, Secondary	D015632	1-Methyl-4-phenyl-1,2,3,6-tetrahydropyridine	28289-54-5	DTXSID8040933	1994	7911652	Glutamate and Parkinson's disease.	7911652	Basal Ganglia Diseases	D010302	Parkinson Disease, Secondary	DTXSID8040933
1-Methyl-4-phenyl-1,2,3,6-tetrahydropyridine	Parkinson Disease, Secondary	D015632	1-Methyl-4-phenyl-1,2,3,6-tetrahydropyridine	28289-54-5	DTXSID8040933	1994	7925842	Regulation by D2 dopamine receptors of in vivo dopamine synthesis in striata of rats and mice with experimental parkinsonism.	7925842	Basal Ganglia Diseases	D010302	Parkinson Disease, Secondary	DTXSID8040933
1-Methyl-4-phenyl-1,2,3,6-tetrahydropyridine	Parkinson Disease, Secondary	D015632	1-Methyl-4-phenyl-1,2,3,6-tetrahydropyridine	28289-54-5	DTXSID8040933	1996	8689042	Restoration of dopamine transporter density in the striatum of fetal ventral mesencephalon-grafted, but not sham-grafted, MPTP-treated parkinsonian monkeys.	8689042	Basal Ganglia Diseases	D010302	Parkinson Disease, Secondary	DTXSID8040933
1-Methyl-4-phenyl-1,2,3,6-tetrahydropyridine	Parkinson Disease, Secondary	D015632	1-Methyl-4-phenyl-1,2,3,6-tetrahydropyridine	28289-54-5	DTXSID8040933	1993	8098931	Effects of terguride, a partial D2 agonist, on MPTP-lesioned parkinsonian cynomolgus monkeys.	8098931	Basal Ganglia Diseases	D010302	Parkinson Disease, Secondary	DTXSID8040933
1-Methyl-4-phenyl-1,2,3,6-tetrahydropyridine	Parkinson Disease, Secondary	D015632	1-Methyl-4-phenyl-1,2,3,6-tetrahydropyridine	28289-54-5	DTXSID8040933	1994	8289584	The novel anticonvulsant lamotrigine prevents dopamine depletion in C57 black mice in the MPTP animal model of Parkinson's disease.	8289584	Basal Ganglia Diseases	D010302	Parkinson Disease, Secondary	DTXSID8040933
1-Methyl-4-phenyl-1,2,3,6-tetrahydropyridine	Parkinson Disease, Secondary	D015632	1-Methyl-4-phenyl-1,2,3,6-tetrahydropyridine	28289-54-5	DTXSID8040933	1993	8095431	Differential effect of chronic dopaminergic treatment on dopamine D1 and D2 receptors in the monkey brain in MPTP-induced parkinsonism.	8095431	Basal Ganglia Diseases	D010302	Parkinson Disease, Secondary	DTXSID8040933
1-Methyl-4-phenyl-1,2,3,6-tetrahydropyridine	Parkinson Disease, Secondary	D015632	1-Methyl-4-phenyl-1,2,3,6-tetrahydropyridine	28289-54-5	DTXSID8040933	1996	8744121	[Effect of interferon on the development of Parkinson's syndrome, caused by administration of 1-methyl-4-phenyl-1,2,3,6-tetrahydropyridine (MPTP) in C57Bl/6 mice].	8744121	Basal Ganglia Diseases	D010302	Parkinson Disease, Secondary	DTXSID8040933
1-Methyl-4-phenyl-1,2,3,6-tetrahydropyridine	Parkinson Disease, Secondary	D015632	1-Methyl-4-phenyl-1,2,3,6-tetrahydropyridine	28289-54-5	DTXSID8040933	1993	8094427	Behavioral tolerance to repeated apomorphine administration in parkinsonian monkeys.	8094427	Basal Ganglia Diseases	D010302	Parkinson Disease, Secondary	DTXSID8040933
1-Methyl-4-phenyl-1,2,3,6-tetrahydropyridine	Parkinson Disease, Secondary	D015632	1-Methyl-4-phenyl-1,2,3,6-tetrahydropyridine	28289-54-5	DTXSID8040933	1993	8413979	Gangliosides and parkinsonism.	8413979	Basal Ganglia Diseases	D010302	Parkinson Disease, Secondary	DTXSID8040933
1-Methyl-4-phenyl-1,2,3,6-tetrahydropyridine	Parkinson Disease, Secondary	D015632	1-Methyl-4-phenyl-1,2,3,6-tetrahydropyridine	28289-54-5	DTXSID8040933	1994	8064321	Medium latency stretch reflexes in young-onset Parkinson's disease and MPTP-induced parkinsonism.	8064321	Basal Ganglia Diseases	D010302	Parkinson Disease, Secondary	DTXSID8040933
1-Methyl-4-phenyl-1,2,3,6-tetrahydropyridine	Parkinson Disease, Secondary	D015632	1-Methyl-4-phenyl-1,2,3,6-tetrahydropyridine	28289-54-5	DTXSID8040933	1995	8588064	Effect of adding the D-1 agonist CY 208-243 to chronic bromocriptine treatment of MPTP-monkeys: regional changes of brain dopamine receptors.	8588064	Basal Ganglia Diseases	D010302	Parkinson Disease, Secondary	DTXSID8040933
1-Methyl-4-phenyl-1,2,3,6-tetrahydropyridine	Parkinson Disease, Secondary	D015632	1-Methyl-4-phenyl-1,2,3,6-tetrahydropyridine	28289-54-5	DTXSID8040933	1993	7509198	6-[18F]fluoro-L-dopa and cerebral blood flow in unilaterally MPTP-treated monkeys.	7509198	Basal Ganglia Diseases	D010302	Parkinson Disease, Secondary	DTXSID8040933
1-Methyl-4-phenyl-1,2,3,6-tetrahydropyridine	Parkinson Disease, Secondary	D015632	1-Methyl-4-phenyl-1,2,3,6-tetrahydropyridine	28289-54-5	DTXSID8040933	1994	8309350	Development of a model for Parkinson's disease in sheep using unilateral intracarotid injection of MPTP via slow continuous infusion.	8309350	Basal Ganglia Diseases	D010302	Parkinson Disease, Secondary	DTXSID8040933
1-Methyl-4-phenyl-1,2,3,6-tetrahydropyridine	Parkinson Disease, Secondary	D015632	1-Methyl-4-phenyl-1,2,3,6-tetrahydropyridine	28289-54-5	DTXSID8040933	1998	9473580	MPTP-Parkinsonism is accompanied by persistent expression of a delta-FosB-like protein in dopaminergic pathways.	9473580	Basal Ganglia Diseases	D010302	Parkinson Disease, Secondary	DTXSID8040933
1-Methyl-4-phenyl-1,2,3,6-tetrahydropyridine	Parkinson Disease, Secondary	D015632	1-Methyl-4-phenyl-1,2,3,6-tetrahydropyridine	28289-54-5	DTXSID8040933	1998	9518590	Effects of L-DOPA on neuronal activity of the globus pallidus externalis (GPe) and globus pallidus internalis (GPi) in the MPTP-treated monkey.	9518590	Basal Ganglia Diseases	D010302	Parkinson Disease, Secondary	DTXSID8040933
1-Methyl-4-phenyl-1,2,3,6-tetrahydropyridine	Parkinson Disease, Secondary	D015632	1-Methyl-4-phenyl-1,2,3,6-tetrahydropyridine	28289-54-5	DTXSID8040933	1997	9195598	Species differences in the role of excitatory amino acids in experimental parkinsonism.	9195598	Basal Ganglia Diseases	D010302	Parkinson Disease, Secondary	DTXSID8040933
1-Methyl-4-phenyl-1,2,3,6-tetrahydropyridine	Parkinson Disease, Secondary	D015632	1-Methyl-4-phenyl-1,2,3,6-tetrahydropyridine	28289-54-5	DTXSID8040933	1996	8819134	Microglial reaction in MPTP (1-methyl-4-phenyl-1,2,3,6-tetrahydropyridine) induced Parkinson's disease mice model.	8819134	Basal Ganglia Diseases	D010302	Parkinson Disease, Secondary	DTXSID8040933
1-Methyl-4-phenyl-1,2,3,6-tetrahydropyridine	Parkinson Disease, Secondary	D015632	1-Methyl-4-phenyl-1,2,3,6-tetrahydropyridine	28289-54-5	DTXSID8040933	1997	9163560	Talipexole or pramipexole combinations with chloro-APB (SKF 82958) in MPTP-induced hemiparkinsonian monkeys.	9163560	Basal Ganglia Diseases	D010302	Parkinson Disease, Secondary	DTXSID8040933
1-Methyl-4-phenyl-1,2,3,6-tetrahydropyridine	Parkinson Disease, Secondary	D015632	1-Methyl-4-phenyl-1,2,3,6-tetrahydropyridine	28289-54-5	DTXSID8040933	1996	9001722	1-Methyl-4-phenyl-1,2,3,6-tetrahydropyridine-induced neurotoxicity in non-human primates is antagonized by pretreatment with nimodipine at the nigral, but not at the striatal level.	9001722	Basal Ganglia Diseases	D010302	Parkinson Disease, Secondary	DTXSID8040933
1-Methyl-4-phenyl-1,2,3,6-tetrahydropyridine	Parkinson Disease, Secondary	D015632	1-Methyl-4-phenyl-1,2,3,6-tetrahydropyridine	28289-54-5	DTXSID8040933	1997	9396088	Comparison of key steps in 1-methyl-4-phenyl-1,2,3,6-tetrahydropyridine (MPTP) neurotoxicity in rodents.	9396088	Basal Ganglia Diseases	D010302	Parkinson Disease, Secondary	DTXSID8040933
1-Methyl-4-phenyl-1,2,3,6-tetrahydropyridine	Parkinson Disease, Secondary	D015632	1-Methyl-4-phenyl-1,2,3,6-tetrahydropyridine	28289-54-5	DTXSID8040933	1996	9280455	[The effect of liposomal form of L-Dopa on the level of dopamine, its metabolites, and phospholipid metabolism in the striatum of mice with experimental parkinsonian syndrome].	9280455	Basal Ganglia Diseases	D010302	Parkinson Disease, Secondary	DTXSID8040933
1-Methyl-4-phenyl-1,2,3,6-tetrahydropyridine	Parkinson Disease, Secondary	D015632	1-Methyl-4-phenyl-1,2,3,6-tetrahydropyridine	28289-54-5	DTXSID8040933	1996	8915594	Effects of L-DOPA-therapy on dopamine D2 receptor mRNA expression in the striatum of MPTP-intoxicated parkinsonian monkeys.	8915594	Basal Ganglia Diseases	D010302	Parkinson Disease, Secondary	DTXSID8040933
1-Methyl-4-phenyl-1,2,3,6-tetrahydropyridine	Parkinson Disease, Secondary	D015632	1-Methyl-4-phenyl-1,2,3,6-tetrahydropyridine	28289-54-5	DTXSID8040933	1997	9398471	Effects of different schedules of MPTP administration on dopaminergic neurodegeneration in mice.	9398471	Basal Ganglia Diseases	D010302	Parkinson Disease, Secondary	DTXSID8040933
1-Methyl-4-phenyl-1,2,3,6-tetrahydropyridine	Parkinson Disease, Secondary	D015632	1-Methyl-4-phenyl-1,2,3,6-tetrahydropyridine	28289-54-5	DTXSID8040933	1996	8974482	[Sleep disorders and impaired learning ability in rats with parkinsonian syndrome induced by MPTP].	8974482	Basal Ganglia Diseases	D010302	Parkinson Disease, Secondary	DTXSID8040933
1-Methyl-4-phenyl-1,2,3,6-tetrahydropyridine	Parkinson Disease, Secondary	D015632	1-Methyl-4-phenyl-1,2,3,6-tetrahydropyridine	28289-54-5	DTXSID8040933	1997	9126147	Neuroprotective therapy for Parkinson's disease.	9126147	Basal Ganglia Diseases	D010302	Parkinson Disease, Secondary	DTXSID8040933
1-Methyl-4-phenyl-1,2,3,6-tetrahydropyridine	Parkinson Disease, Secondary	D015632	1-Methyl-4-phenyl-1,2,3,6-tetrahydropyridine	28289-54-5	DTXSID8040933	1998	9827593	The role of the thalamus and basal ganglia in parkinsonian tremor.	9827593	Basal Ganglia Diseases	D010302	Parkinson Disease, Secondary	DTXSID8040933
1-Methyl-4-phenyl-1,2,3,6-tetrahydropyridine	Parkinson Disease, Secondary	D015632	1-Methyl-4-phenyl-1,2,3,6-tetrahydropyridine	28289-54-5	DTXSID8040933	1998	9756328	Glial cell line-derived neurotrophic factor protects against 1-methyl-4-phenyl-1,2,3,6-tetrahydropyridine (MPTP)-induced neurotoxicity in C57BL/6 mice.	9756328	Basal Ganglia Diseases	D010302	Parkinson Disease, Secondary	DTXSID8040933
1-Methyl-4-phenyl-1,2,3,6-tetrahydropyridine	Parkinson Disease, Secondary	D015632	1-Methyl-4-phenyl-1,2,3,6-tetrahydropyridine	28289-54-5	DTXSID8040933	1998	9710520	MPTP-Induced hemiparkinsonism in nonhuman primates 6-8 years after a single unilateral intracarotid dose.	9710520	Basal Ganglia Diseases	D010302	Parkinson Disease, Secondary	DTXSID8040933
1-Methyl-4-phenyl-1,2,3,6-tetrahydropyridine	Parkinson Disease, Secondary	D015632	1-Methyl-4-phenyl-1,2,3,6-tetrahydropyridine	28289-54-5	DTXSID8040933	1998	9860271	Efferent synaptic connections of dopaminergic neurons grafted into the caudate nucleus of experimentally induced parkinsonian monkeys are different from those of control animals.	9860271	Basal Ganglia Diseases	D010302	Parkinson Disease, Secondary	DTXSID8040933
1-Methyl-4-phenyl-1,2,3,6-tetrahydropyridine	Parkinson Disease, Secondary	D015632	1-Methyl-4-phenyl-1,2,3,6-tetrahydropyridine	28289-54-5	DTXSID8040933	1998	9928895	Environmental MPTP as a factor in the aetiology of Parkinson's disease?	9928895	Basal Ganglia Diseases	D010302	Parkinson Disease, Secondary	DTXSID8040933
1-Methyl-4-phenyl-1,2,3,6-tetrahydropyridine	Parkinson Disease, Secondary	D015632	1-Methyl-4-phenyl-1,2,3,6-tetrahydropyridine	28289-54-5	DTXSID8040933	1998	9754903	Microglial and astrocytic involvement in a murine model of Parkinson's disease induced by 1-methyl-4-phenyl-1,2,3,6-tetrahydropyridine (MPTP).	9754903	Basal Ganglia Diseases	D010302	Parkinson Disease, Secondary	DTXSID8040933
1-Methyl-4-phenyl-1,2,3,6-tetrahydropyridine	Parkinson Disease, Secondary	D015632	1-Methyl-4-phenyl-1,2,3,6-tetrahydropyridine	28289-54-5	DTXSID8040933	1998	9613716	Mechanisms of MPTP toxicity.	9613716	Basal Ganglia Diseases	D010302	Parkinson Disease, Secondary	DTXSID8040933
1-Methyl-4-phenyl-1,2,3,6-tetrahydropyridine	Parkinson Disease, Secondary	D015632	1-Methyl-4-phenyl-1,2,3,6-tetrahydropyridine	28289-54-5	DTXSID8040933	1998	9635986	N-methyl-(R)-salsolinol and Parkinson's disease.	9635986	Basal Ganglia Diseases	D010302	Parkinson Disease, Secondary	DTXSID8040933
1-Methyl-4-phenyl-1,2,3,6-tetrahydropyridine	Parkinson Disease, Secondary	D015632	1-Methyl-4-phenyl-1,2,3,6-tetrahydropyridine	28289-54-5	DTXSID8040933	1998	9710523	Trihexyphenidyl potentiation of L-DOPA: reduced effectiveness three years later in MPTP-induced chronic hemiparkinsonian monkeys.	9710523	Basal Ganglia Diseases	D010302	Parkinson Disease, Secondary	DTXSID8040933
1-Methyl-4-phenyl-1,2,3,6-tetrahydropyridine	Parkinson Disease, Secondary	D015632	1-Methyl-4-phenyl-1,2,3,6-tetrahydropyridine	28289-54-5	DTXSID8040933	1998	9668361	Effects of GM1 ganglioside treatment on dopamine innervation of the striatum of MPTP-treated mice.	9668361	Basal Ganglia Diseases	D010302	Parkinson Disease, Secondary	DTXSID8040933
1-Methyl-4-phenyl-1,2,3,6-tetrahydropyridine	Parkinson Disease, Secondary	D015632	1-Methyl-4-phenyl-1,2,3,6-tetrahydropyridine	28289-54-5	DTXSID8040933	1985	3878482	Sites of the neurotoxic action of 1-methyl-4-phenyl-1,2,3,6-tetrahydropyridine in the macaque monkey include the ventral tegmental area and the locus coeruleus.	3878482	Basal Ganglia Diseases	D010302	Parkinson Disease, Secondary	DTXSID8040933
1-Methyl-4-phenyl-1,2,3,6-tetrahydropyridine	Parkinson Disease, Secondary	D015632	1-Methyl-4-phenyl-1,2,3,6-tetrahydropyridine	28289-54-5	DTXSID8040933	1985	3875807	Intellectual changes in patients with MPTP-induced parkinsonism.	3875807	Basal Ganglia Diseases	D010302	Parkinson Disease, Secondary	DTXSID8040933
1-Methyl-4-phenyl-1,2,3,6-tetrahydropyridine	Parkinson Disease, Secondary	D015632	1-Methyl-4-phenyl-1,2,3,6-tetrahydropyridine	28289-54-5	DTXSID8040933	1985	3871241	Primate model of parkinsonism: selective lesion of nigrostriatal neurons by 1-methyl-4-phenyl-1,2,3,6-tetrahydropyridine produces an extrapyramidal syndrome in rhesus monkeys.	3871241	Basal Ganglia Diseases	D010302	Parkinson Disease, Secondary	DTXSID8040933
1-Methyl-4-phenyl-1,2,3,6-tetrahydropyridine	Parkinson Disease, Secondary	D015632	1-Methyl-4-phenyl-1,2,3,6-tetrahydropyridine	28289-54-5	DTXSID8040933	1985	3876500	Comparative behavioral, biochemical and pigmentary effects of MPTP, MPP+ and paraquat in Rana pipiens.	3876500	Basal Ganglia Diseases	D010302	Parkinson Disease, Secondary	DTXSID8040933
1-Methyl-4-phenyl-1,2,3,6-tetrahydropyridine	Parkinson Disease, Secondary	D015632	1-Methyl-4-phenyl-1,2,3,6-tetrahydropyridine	28289-54-5	DTXSID8040933	1985	3876510	Positron emission tomography after MPTP: observations relating to the cause of Parkinson's disease.	3876510	Basal Ganglia Diseases	D010302	Parkinson Disease, Secondary	DTXSID8040933
1-Methyl-4-phenyl-1,2,3,6-tetrahydropyridine	Parkinson Disease, Secondary	D015632	1-Methyl-4-phenyl-1,2,3,6-tetrahydropyridine	28289-54-5	DTXSID8040933	1985	3876575	MPTP and parkinsonism.	3876575	Basal Ganglia Diseases	D010302	Parkinson Disease, Secondary	DTXSID8040933
1-Methyl-4-phenyl-1,2,3,6-tetrahydropyridine	Parkinson Disease, Secondary	D015632	1-Methyl-4-phenyl-1,2,3,6-tetrahydropyridine	28289-54-5	DTXSID8040933	1985	3876508	The clinical syndrome of striatal dopamine deficiency: parkinsonism induced by MPTP.	3876508	Basal Ganglia Diseases	D010302	Parkinson Disease, Secondary	DTXSID8040933
1-Methyl-4-phenyl-1,2,3,6-tetrahydropyridine	Parkinson Disease, Secondary	D015632	1-Methyl-4-phenyl-1,2,3,6-tetrahydropyridine	28289-54-5	DTXSID8040933	1989	2783550	Chemically induced Parkinson's disease. II: Intermediates in the oxidation and reduction reactions of the 1-methyl-4-phenyl-2,3-dihydropyridinium ion and its deprotonated form.	2783550	Basal Ganglia Diseases	D010302	Parkinson Disease, Secondary	DTXSID8040933
1-Methyl-4-phenyl-1,2,3,6-tetrahydropyridine	Parkinson Disease, Secondary	D015632	1-Methyl-4-phenyl-1,2,3,6-tetrahydropyridine	28289-54-5	DTXSID8040933	2017	28108849	Toll Like Receptor 4 Affects the Cerebral Biochemical Changes Induced by MPTP Treatment.	28108849	Basal Ganglia Diseases	D010302	Parkinson Disease, Secondary	DTXSID8040933
1-Methyl-4-phenyl-1,2,3,6-tetrahydropyridine	Parkinson Disease, Secondary	D015632	1-Methyl-4-phenyl-1,2,3,6-tetrahydropyridine	28289-54-5	DTXSID8040933	2015	25681412	Reduced cortical innervation of the subthalamic nucleus in MPTP-treated parkinsonian monkeys.	25681412	Basal Ganglia Diseases	D010302	Parkinson Disease, Secondary	DTXSID8040933
1-Methyl-4-phenyl-1,2,3,6-tetrahydropyridine	Parkinson Disease, Secondary	D015632	1-Methyl-4-phenyl-1,2,3,6-tetrahydropyridine	28289-54-5	DTXSID8040933	2015	26114655	Targeted Overexpression of α-Synuclein by rAAV2/1 Vectors Induces Progressive Nigrostriatal Degeneration and Increases Vulnerability to MPTP in Mouse.	26114655	Basal Ganglia Diseases	D010302	Parkinson Disease, Secondary	DTXSID8040933
1-Methyl-4-phenyl-1,2,3,6-tetrahydropyridine	Parkinson Disease, Secondary	D015632	1-Methyl-4-phenyl-1,2,3,6-tetrahydropyridine	28289-54-5	DTXSID8040933	1989	2688042	[MPTP: a new chapter in the history of Parkinson's disease].	2688042	Basal Ganglia Diseases	D010302	Parkinson Disease, Secondary	DTXSID8040933
1-Methyl-4-phenyl-1,2,3,6-tetrahydropyridine	Parkinson Disease, Secondary	D015632	1-Methyl-4-phenyl-1,2,3,6-tetrahydropyridine	28289-54-5	DTXSID8040933	1989	2689379	Animal models of parkinsonism using selective neurotoxins: clinical and basic implications.	2689379	Basal Ganglia Diseases	D010302	Parkinson Disease, Secondary	DTXSID8040933
1-Methyl-4-phenyl-1,2,3,6-tetrahydropyridine	Parkinson Disease, Secondary	D015632	1-Methyl-4-phenyl-1,2,3,6-tetrahydropyridine	28289-54-5	DTXSID8040933	2016	26431624	Progression and recovery of Parkinsonism in a chronic progressive MPTP-induction model in the marmoset without persistent molecular and cellular damage.	26431624	Basal Ganglia Diseases	D010302	Parkinson Disease, Secondary	DTXSID8040933
1-Methyl-4-phenyl-1,2,3,6-tetrahydropyridine	Parkinson Disease, Secondary	D015632	1-Methyl-4-phenyl-1,2,3,6-tetrahydropyridine	28289-54-5	DTXSID8040933	2016	27395789	Nimodipine, an L-type calcium channel blocker attenuates mitochondrial dysfunctions to protect against 1-methyl-4-phenyl-1,2,3,6-tetrahydropyridine-induced Parkinsonism in mice.	27395789	Basal Ganglia Diseases	D010302	Parkinson Disease, Secondary	DTXSID8040933
1-Methyl-4-phenyl-1,2,3,6-tetrahydropyridine	Parkinson Disease, Secondary	D015632	1-Methyl-4-phenyl-1,2,3,6-tetrahydropyridine	28289-54-5	DTXSID8040933	1989	2687716	Effect of the NMDA antagonist MK-801 on MPTP-induced parkinsonism in the monkey.	2687716	Basal Ganglia Diseases	D010302	Parkinson Disease, Secondary	DTXSID8040933
1-Methyl-4-phenyl-1,2,3,6-tetrahydropyridine	Parkinson Disease, Secondary	D015632	1-Methyl-4-phenyl-1,2,3,6-tetrahydropyridine	28289-54-5	DTXSID8040933	1989	2790469	Responses of pallidal neurons to striatal stimulation in monkeys with MPTP-induced parkinsonism.	2790469	Basal Ganglia Diseases	D010302	Parkinson Disease, Secondary	DTXSID8040933
1-Methyl-4-phenyl-1,2,3,6-tetrahydropyridine	Parkinson Disease, Secondary	D015632	1-Methyl-4-phenyl-1,2,3,6-tetrahydropyridine	28289-54-5	DTXSID8040933	1985	2581135	The clinical syndrome of striatal dopamine deficiency. Parkinsonism induced by 1-methyl-4-phenyl-1,2,3,6-tetrahydropyridine (MPTP).	2581135	Basal Ganglia Diseases	D010302	Parkinson Disease, Secondary	DTXSID8040933
1-Methyl-4-phenyl-1,2,3,6-tetrahydropyridine	Parkinson Disease, Secondary	D015632	1-Methyl-4-phenyl-1,2,3,6-tetrahydropyridine	28289-54-5	DTXSID8040933	2015	25839189	Proof of concept studies exploring the safety and functional activity of human parthenogenetic-derived neural stem cells for the treatment of Parkinson's disease.	25839189	Basal Ganglia Diseases	D010302	Parkinson Disease, Secondary	DTXSID8040933
1-Methyl-4-phenyl-1,2,3,6-tetrahydropyridine	Parkinson Disease, Secondary	D015632	1-Methyl-4-phenyl-1,2,3,6-tetrahydropyridine	28289-54-5	DTXSID8040933	1985	2581589	The influence of N-methyl-4-phenyl-1,2,3,6-tetrahydropyridine on the levels of dopamine, serotonin and their metabolites in the caudate nucleus of the rat.	2581589	Basal Ganglia Diseases	D010302	Parkinson Disease, Secondary	DTXSID8040933
1-Methyl-4-phenyl-1,2,3,6-tetrahydropyridine	Parkinson Disease, Secondary	D015632	1-Methyl-4-phenyl-1,2,3,6-tetrahydropyridine	28289-54-5	DTXSID8040933	1989	2622529	Symptomatic and asymptomatic 1-methyl-4-phenyl-1,2,3,6-tetrahydropyridine-treated primates: biochemical changes in striatal regions.	2622529	Basal Ganglia Diseases	D010302	Parkinson Disease, Secondary	DTXSID8040933
1-Methyl-4-phenyl-1,2,3,6-tetrahydropyridine	Parkinson Disease, Secondary	D015632	1-Methyl-4-phenyl-1,2,3,6-tetrahydropyridine	28289-54-5	DTXSID8040933	1989	2686017	[MPTP (N-methyl-4-phenyl-1,2,3,6-tetrahydropyridine) and parkinsonism].	2686017	Basal Ganglia Diseases	D010302	Parkinson Disease, Secondary	DTXSID8040933
1-Methyl-4-phenyl-1,2,3,6-tetrahydropyridine	Parkinson Disease, Secondary	D015632	1-Methyl-4-phenyl-1,2,3,6-tetrahydropyridine	28289-54-5	DTXSID8040933	2015	26859995	[Early Stages of Parkinson's Disease: Comparative Characteristics of Sleep-Wakefulness Cycle in Patients and Model Animals].	26859995	Basal Ganglia Diseases	D010302	Parkinson Disease, Secondary	DTXSID8040933
1-Methyl-4-phenyl-1,2,3,6-tetrahydropyridine	Parkinson Disease, Secondary	D015632	1-Methyl-4-phenyl-1,2,3,6-tetrahydropyridine	28289-54-5	DTXSID8040933	1989	2790166	[Evaluation of the capability of 1-methyl-4-phenyl-1,2,3,6-tetrahydropyridine and pyridine derivatives to evoke parkinsonism].	2790166	Basal Ganglia Diseases	D010302	Parkinson Disease, Secondary	DTXSID8040933
1-Methyl-4-phenyl-1,2,3,6-tetrahydropyridine	Parkinson Disease, Secondary	D015632	1-Methyl-4-phenyl-1,2,3,6-tetrahydropyridine	28289-54-5	DTXSID8040933	2015	25631236	Neurotoxin mechanisms and processes relevant to Parkinson's disease: an update.	25631236	Basal Ganglia Diseases	D010302	Parkinson Disease, Secondary	DTXSID8040933
1-Methyl-4-phenyl-1,2,3,6-tetrahydropyridine	Parkinson Disease, Secondary	D015632	1-Methyl-4-phenyl-1,2,3,6-tetrahydropyridine	28289-54-5	DTXSID8040933	1989	2586750	Neural mechanisms underlying parkinsonian symptoms based upon regional uptake of 2-deoxyglucose in monkeys exposed to 1-methyl-4-phenyl-1,2,3,6-tetrahydropyridine.	2586750	Basal Ganglia Diseases	D010302	Parkinson Disease, Secondary	DTXSID8040933
1-Methyl-4-phenyl-1,2,3,6-tetrahydropyridine	Parkinson Disease, Secondary	D015632	1-Methyl-4-phenyl-1,2,3,6-tetrahydropyridine	28289-54-5	DTXSID8040933	1989	2637935	MPTP-induced Parkinson-like disease in sheep: clinical and pathologic findings.	2637935	Basal Ganglia Diseases	D010302	Parkinson Disease, Secondary	DTXSID8040933
1-Methyl-4-phenyl-1,2,3,6-tetrahydropyridine	Parkinson Disease, Secondary	D015632	1-Methyl-4-phenyl-1,2,3,6-tetrahydropyridine	28289-54-5	DTXSID8040933	1989	2812327	Mild parkinsonism in persons exposed to 1-methyl-4-phenyl-1,2,3,6-tetrahydropyridine (MPTP).	2812327	Basal Ganglia Diseases	D010302	Parkinson Disease, Secondary	DTXSID8040933
1-Methyl-4-phenyl-1,2,3,6-tetrahydropyridine	Parkinson Disease, Secondary	D015632	1-Methyl-4-phenyl-1,2,3,6-tetrahydropyridine	28289-54-5	DTXSID8040933	1989	2669769	Some features of the nigrostriatal dopaminergic neurotoxin 1-methyl-4-phenyl-1,2,3,6-tetrahydropyridine (MPTP) in the mouse.	2669769	Basal Ganglia Diseases	D010302	Parkinson Disease, Secondary	DTXSID8040933
1-Methyl-4-phenyl-1,2,3,6-tetrahydropyridine	Parkinson Disease, Secondary	D015632	1-Methyl-4-phenyl-1,2,3,6-tetrahydropyridine	28289-54-5	DTXSID8040933	1989	2698296	[Contribution of MPTP to studies on the pathogenesis of Parkinson's disease].	2698296	Basal Ganglia Diseases	D010302	Parkinson Disease, Secondary	DTXSID8040933
1-Methyl-4-phenyl-1,2,3,6-tetrahydropyridine	Parkinson Disease, Secondary	D015632	1-Methyl-4-phenyl-1,2,3,6-tetrahydropyridine	28289-54-5	DTXSID8040933	2017	27694423	Posttransplant Lymphoproliferative Disorders in Neuronal Xenotransplanted Macaques.	27694423	Basal Ganglia Diseases	D010302	Parkinson Disease, Secondary	DTXSID8040933
1-Methyl-4-phenyl-1,2,3,6-tetrahydropyridine	Parkinson Disease, Secondary	D015632	1-Methyl-4-phenyl-1,2,3,6-tetrahydropyridine	28289-54-5	DTXSID8040933	2016	26994817	Medicinal plant Combretum leprosum mart ameliorates motor, biochemical and molecular alterations in a Parkinson's disease model induced by MPTP.	26994817	Basal Ganglia Diseases	D010302	Parkinson Disease, Secondary	DTXSID8040933
1-Methyl-4-phenyl-1,2,3,6-tetrahydropyridine	Parkinson Disease, Secondary	D015632	1-Methyl-4-phenyl-1,2,3,6-tetrahydropyridine	28289-54-5	DTXSID8040933	1989	2785665	Effects of 1-methyl-4-phenyl-1,2,3,6-tetrahydropyridine (MPTP) on ultrastructure of nigral neuromelanin in Macaca fascicularis.	2785665	Basal Ganglia Diseases	D010302	Parkinson Disease, Secondary	DTXSID8040933
1-Methyl-4-phenyl-1,2,3,6-tetrahydropyridine	Parkinson Disease, Secondary	D015632	1-Methyl-4-phenyl-1,2,3,6-tetrahydropyridine	28289-54-5	DTXSID8040933	1989	2614476	Transplantation of human sympathetic neurons and adrenal chromaffin cells into parkinsonian monkeys: no reversal of clinical symptoms.	2614476	Basal Ganglia Diseases	D010302	Parkinson Disease, Secondary	DTXSID8040933
1-Methyl-4-phenyl-1,2,3,6-tetrahydropyridine	Parkinson Disease, Secondary	D015632	1-Methyl-4-phenyl-1,2,3,6-tetrahydropyridine	28289-54-5	DTXSID8040933	1989	2694734	MPTP-induced parkinsonism as a model for Parkinson's disease.	2694734	Basal Ganglia Diseases	D010302	Parkinson Disease, Secondary	DTXSID8040933
1-Methyl-4-phenyl-1,2,3,6-tetrahydropyridine	Parkinson Disease, Secondary	D015632	1-Methyl-4-phenyl-1,2,3,6-tetrahydropyridine	28289-54-5	DTXSID8040933	1989	2597310	MDL 72,974: a potent and selective enzyme-activated irreversible inhibitor of monoamine oxidase type B with potential for use in Parkinson's disease.	2597310	Basal Ganglia Diseases	D010302	Parkinson Disease, Secondary	DTXSID8040933
1-Methyl-4-phenyl-1,2,3,6-tetrahydropyridine	Parkinson Disease, Secondary	D015632	1-Methyl-4-phenyl-1,2,3,6-tetrahydropyridine	28289-54-5	DTXSID8040933	1989	2565752	GM1 ganglioside-induced recovery of nigrostriatal dopaminergic neurons after MPTP: an immunohistochemical study.	2565752	Basal Ganglia Diseases	D010302	Parkinson Disease, Secondary	DTXSID8040933
1-Methyl-4-phenyl-1,2,3,6-tetrahydropyridine	Parkinson Disease, Secondary	D015632	1-Methyl-4-phenyl-1,2,3,6-tetrahydropyridine	28289-54-5	DTXSID8040933	1989	2786926	Drug-induced dyskinesia in primates rendered hemiparkinsonian by intracarotid administration of 1-methyl-4-phenyl-1,2,3,6-tetrahydropyridine (MPTP).	2786926	Basal Ganglia Diseases	D010302	Parkinson Disease, Secondary	DTXSID8040933
1-Methyl-4-phenyl-1,2,3,6-tetrahydropyridine	Parkinson Disease, Secondary	D015632	1-Methyl-4-phenyl-1,2,3,6-tetrahydropyridine	28289-54-5	DTXSID8040933	1989	2656447	[Significance of the neurotoxin 1-methyl-4-phenyl-1,2,3,6-tetrahydropyridine for the etiology and therapy of idiopathic Parkinson disease].	2656447	Basal Ganglia Diseases	D010302	Parkinson Disease, Secondary	DTXSID8040933
1-Methyl-4-phenyl-1,2,3,6-tetrahydropyridine	Parkinson Disease, Secondary	D015632	1-Methyl-4-phenyl-1,2,3,6-tetrahydropyridine	28289-54-5	DTXSID8040933	1987	2893993	An immunohistochemical study of the acute and long-term effects of 1-methyl-4-phenyl-1,2,3,6-tetrahydropyridine in the marmoset.	2893993	Basal Ganglia Diseases	D010302	Parkinson Disease, Secondary	DTXSID8040933
1-Methyl-4-phenyl-1,2,3,6-tetrahydropyridine	Parkinson Disease, Secondary	D015632	1-Methyl-4-phenyl-1,2,3,6-tetrahydropyridine	28289-54-5	DTXSID8040933	1986	3520683	[Mechanism of induction of parkinsonism by 1-methyl-4-phenyl-1,2,3,6-tetrahydropyridine (MPTP), a dopaminergic neurotoxin].	3520683	Basal Ganglia Diseases	D010302	Parkinson Disease, Secondary	DTXSID8040933
1-Methyl-4-phenyl-1,2,3,6-tetrahydropyridine	Parkinson Disease, Secondary	D015632	1-Methyl-4-phenyl-1,2,3,6-tetrahydropyridine	28289-54-5	DTXSID8040933	1986	3491578	Saccade responses to dopamine in human MPTP-induced parkinsonism.	3491578	Basal Ganglia Diseases	D010302	Parkinson Disease, Secondary	DTXSID8040933
1-Methyl-4-phenyl-1,2,3,6-tetrahydropyridine	Parkinson Disease, Secondary	D015632	1-Methyl-4-phenyl-1,2,3,6-tetrahydropyridine	28289-54-5	DTXSID8040933	1988	3126391	MPTP in animal models of Parkinson's disease.	3126391	Basal Ganglia Diseases	D010302	Parkinson Disease, Secondary	DTXSID8040933
1-Methyl-4-phenyl-1,2,3,6-tetrahydropyridine	Parkinson Disease, Secondary	D015632	1-Methyl-4-phenyl-1,2,3,6-tetrahydropyridine	28289-54-5	DTXSID8040933	2017	28338241	Neuroprotective Effects of Loganin on MPTP-Induced Parkinson's Disease Mice: Neurochemistry, Glial Reaction and Autophagy Studies.	28338241	Basal Ganglia Diseases	D010302	Parkinson Disease, Secondary	DTXSID8040933
1-Methyl-4-phenyl-1,2,3,6-tetrahydropyridine	Parkinson Disease, Secondary	D015632	1-Methyl-4-phenyl-1,2,3,6-tetrahydropyridine	28289-54-5	DTXSID8040933	1988	3259295	1-Methyl-4-phenyl-1,2,3,6-tetrahydropyridine-induced parkinsonian syndrome in Macaca fascicularis: which midbrain dopaminergic neurons are lost?	3259295	Basal Ganglia Diseases	D010302	Parkinson Disease, Secondary	DTXSID8040933
1-Methyl-4-phenyl-1,2,3,6-tetrahydropyridine	Parkinson Disease, Secondary	D015632	1-Methyl-4-phenyl-1,2,3,6-tetrahydropyridine	28289-54-5	DTXSID8040933	1988	3259617	1-Methyl-4-phenyl-1,2,3,6-tetrahydropyridine (MPTP): one designer drug and serendipity.	3259617	Basal Ganglia Diseases	D010302	Parkinson Disease, Secondary	DTXSID8040933
1-Methyl-4-phenyl-1,2,3,6-tetrahydropyridine	Parkinson Disease, Secondary	D015632	1-Methyl-4-phenyl-1,2,3,6-tetrahydropyridine	28289-54-5	DTXSID8040933	1988	3261249	Behavioral and biochemical effect of chronic treatment with D-1 and/or D-2 dopamine agonists in MPTP monkeys.	3261249	Basal Ganglia Diseases	D010302	Parkinson Disease, Secondary	DTXSID8040933
1-Methyl-4-phenyl-1,2,3,6-tetrahydropyridine	Parkinson Disease, Secondary	D015632	1-Methyl-4-phenyl-1,2,3,6-tetrahydropyridine	28289-54-5	DTXSID8040933	1987	3493624	Changes in the local cerebral metabolic rate for glucose in the MPTP primate model of Parkinson's disease.	3493624	Basal Ganglia Diseases	D010302	Parkinson Disease, Secondary	DTXSID8040933
1-Methyl-4-phenyl-1,2,3,6-tetrahydropyridine	Parkinson Disease, Secondary	D015632	1-Methyl-4-phenyl-1,2,3,6-tetrahydropyridine	28289-54-5	DTXSID8040933	1986	3484707	Production of a Parkinson-like syndrome in the cat with N-methyl-4-phenyl-1,2,3,6-tetrahydropyridine (MPTP): behavior, histology, and biochemistry.	3484707	Basal Ganglia Diseases	D010302	Parkinson Disease, Secondary	DTXSID8040933
1-Methyl-4-phenyl-1,2,3,6-tetrahydropyridine	Parkinson Disease, Secondary	D015632	1-Methyl-4-phenyl-1,2,3,6-tetrahydropyridine	28289-54-5	DTXSID8040933	1986	3091759	The MPTP story: an introduction.	3091759	Basal Ganglia Diseases	D010302	Parkinson Disease, Secondary	DTXSID8040933
1-Methyl-4-phenyl-1,2,3,6-tetrahydropyridine	Parkinson Disease, Secondary	D015632	1-Methyl-4-phenyl-1,2,3,6-tetrahydropyridine	28289-54-5	DTXSID8040933	1988	3264746	Hemiparkinsonism in monkeys after unilateral caudate nucleus infusion of 1-methyl-4-phenyl-1,2,3,6-tetrahydropyridine (MPTP): behavior and histology.	3264746	Basal Ganglia Diseases	D010302	Parkinson Disease, Secondary	DTXSID8040933
1-Methyl-4-phenyl-1,2,3,6-tetrahydropyridine	Parkinson Disease, Secondary	D015632	1-Methyl-4-phenyl-1,2,3,6-tetrahydropyridine	28289-54-5	DTXSID8040933	2017	28552716	Nrf2 activation by tauroursodeoxycholic acid in experimental models of Parkinson's disease.	28552716	Basal Ganglia Diseases	D010302	Parkinson Disease, Secondary	DTXSID8040933
1-Methyl-4-phenyl-1,2,3,6-tetrahydropyridine	Parkinson Disease, Secondary	D015632	1-Methyl-4-phenyl-1,2,3,6-tetrahydropyridine	28289-54-5	DTXSID8040933	1987	3493621	Toxins and Parkinson's disease: MPTP parkinsonism in humans and animals.	3493621	Basal Ganglia Diseases	D010302	Parkinson Disease, Secondary	DTXSID8040933
1-Methyl-4-phenyl-1,2,3,6-tetrahydropyridine	Parkinson Disease, Secondary	D015632	1-Methyl-4-phenyl-1,2,3,6-tetrahydropyridine	28289-54-5	DTXSID8040933	1988	3129982	MPTP toxicity: implications for research in Parkinson's disease.	3129982	Basal Ganglia Diseases	D010302	Parkinson Disease, Secondary	DTXSID8040933
1-Methyl-4-phenyl-1,2,3,6-tetrahydropyridine	Parkinson Disease, Secondary	D015632	1-Methyl-4-phenyl-1,2,3,6-tetrahydropyridine	28289-54-5	DTXSID8040933	1987	3103408	Parkinson's disease: current view.	3103408	Basal Ganglia Diseases	D010302	Parkinson Disease, Secondary	DTXSID8040933
1-Methyl-4-phenyl-1,2,3,6-tetrahydropyridine	Parkinson Disease, Secondary	D015632	1-Methyl-4-phenyl-1,2,3,6-tetrahydropyridine	28289-54-5	DTXSID8040933	1987	3103386	Pathology of MPTP in the marmoset.	3103386	Basal Ganglia Diseases	D010302	Parkinson Disease, Secondary	DTXSID8040933
1-Methyl-4-phenyl-1,2,3,6-tetrahydropyridine	Parkinson Disease, Secondary	D015632	1-Methyl-4-phenyl-1,2,3,6-tetrahydropyridine	28289-54-5	DTXSID8040933	1987	3103385	Determination and visualization of damage to striatal dopaminergic terminals in 1-methyl-4-phenyl-1,2,3,6-tetrahydropyridine-induced parkinsonism by [18F]-labeled 6-fluoro-L-dopa and positron emission tomography.	3103385	Basal Ganglia Diseases	D010302	Parkinson Disease, Secondary	DTXSID8040933
1-Methyl-4-phenyl-1,2,3,6-tetrahydropyridine	Parkinson Disease, Secondary	D015632	1-Methyl-4-phenyl-1,2,3,6-tetrahydropyridine	28289-54-5	DTXSID8040933	1988	3259063	Neuropathological study on 1-methyl-4-phenyl-1,2,3,6-tetrahydropyridine of the crab-eating monkey.	3259063	Basal Ganglia Diseases	D010302	Parkinson Disease, Secondary	DTXSID8040933
1-Methyl-4-phenyl-1,2,3,6-tetrahydropyridine	Parkinson Disease, Secondary	D015632	1-Methyl-4-phenyl-1,2,3,6-tetrahydropyridine	28289-54-5	DTXSID8040933	1987	2881442	Ro 16-6491: a new reversible and highly selective MAO-B inhibitor protects mice from the dopaminergic neurotoxicity of MPTP.	2881442	Basal Ganglia Diseases	D010302	Parkinson Disease, Secondary	DTXSID8040933
1-Methyl-4-phenyl-1,2,3,6-tetrahydropyridine	Parkinson Disease, Secondary	D015632	1-Methyl-4-phenyl-1,2,3,6-tetrahydropyridine	28289-54-5	DTXSID8040933	1987	2881443	MPTP-induced parkinsonism in the common marmoset: behavioral and biochemical effects.	2881443	Basal Ganglia Diseases	D010302	Parkinson Disease, Secondary	DTXSID8040933
1-Methyl-4-phenyl-1,2,3,6-tetrahydropyridine	Parkinson Disease, Secondary	D015632	1-Methyl-4-phenyl-1,2,3,6-tetrahydropyridine	28289-54-5	DTXSID8040933	1988	3257287	MPTP in mice: treatment, distribution and possible source of contamination.	3257287	Basal Ganglia Diseases	D010302	Parkinson Disease, Secondary	DTXSID8040933
1-Methyl-4-phenyl-1,2,3,6-tetrahydropyridine	Parkinson Disease, Secondary	D015632	1-Methyl-4-phenyl-1,2,3,6-tetrahydropyridine	28289-54-5	DTXSID8040933	1988	3258018	Potent neurotoxic fluorinated 1-methyl-4-phenyl-1,2,3,6-tetrahydropyridine analogs as potential probes in models of Parkinson disease.	3258018	Basal Ganglia Diseases	D010302	Parkinson Disease, Secondary	DTXSID8040933
[truncated: 53,217 more rows]
